# Supplementary material for: Deep Learning Deciphers the Related Role of Master Regulators and G-Quadruplexes in Tissue Specification
Source: Research Square preprint supplement (doi:10.21203/rs.3.rs-6165621/v1), 2025-03-11
Supplement: Supplementary file 1 [file 2d8bb3b1cdb59de4c6d94cea.xlsx]

## Sheet: Sheet1
Deep Learning Deciphers the Related Role of Master Regulators and G-Quadruplexes in Tissue Specification
	Artem Bashkatov, Andrey Andreasyan, Dmitry Konovalov, Alan Herbert, Maria Poptsova
Supplementary Table 1.			Comparison of DeepGQ with EndoQuad and other GQ experimental data sets.

## Sheet: with core
Number and share of overlaps between different G4 datasets
		DeepGQ		pattern		EndoQuad		G4-DNABERT		KEx		G4-seq		G4-ChIP		Cut&Tag		KAS-seq		Adipocyte		Bone		Breast		Cardiovascular		Digestive_tract		Epidermis		Kidney		Liver		Lung		Muscle		Neural		Pancreas		Prostate		uterus
	to from	n	%	n	%	n	%	n	%	n	%	n	%	n	%	n	%	n		n		n	%	n	%	n	%	n	%	n	%	n	%	n	%	n	0.241238	n	%	n	%	n	%	n	%	n	%
	DeepGQ	124618	1	42776	0.343257	115871	0.929809	43066	0.345584	22065	0.177061	106781	0.856867	10209	0.0819224	43056	0.345504	41085	0.329688	124618	1	124618	1	124618	1	124618	1	124618	1	124618	1	124618	1	124618	1	124618	1	124618	1	124618	1	124618	1	124618	1	124618	1
	pattern	49139	0.132926	369672	1	96436	0.260869	175622	0.475075	53061	0.143535	273184	0.73899	5202	0.0140719	28147	0.0761405	36340	0.0983034	65255	0.176521	83974	0.227158	77322	0.209164	90892	0.245872	89306	0.241582	83573	0.226073	71017	0.192108	82533	0.22326	89179		82054	0.221964	89684	0.242604	91000	0.246164	82941	0.224364	76626	0.207281
	EndoQuad	167641	0.428199	102966	0.263002	391503	1	95365	0.243587	46358	0.11841	318883	0.81451	16351	0.0417647	91525	0.233779	97078	0.247962	217888	0.556542	271031	0.692283	258028	0.65907	294287	0.751685	285826	0.730074	268746	0.686447	244459	0.624412	258887	0.661264	279035	0.712728	265651	0.678541	281363	0.718674	287226	0.73365	268382	0.685517	250810	0.640634
	G4-DNABERT	49452	0.272107	176626	0.971877	89099	0.490263	181737	1	52519	0.288984	148416	0.816653	5152	0.0283487	26541	0.146041	28509	0.15687	63808	0.351101	81765	0.449908	75279	0.414219	87071	0.479104	86149	0.474031	80522	0.443069	69659	0.383296	80360	0.442177	86165	0.474119	79519	0.43755	85955	0.472964	87728	0.48272	79978	0.440075	75427	0.415034
	KEx	25187	0.474501	53081	1	42906	0.808312	52544	0.989883	53081	1	47525	0.89533	1183	0.0222867	9095	0.171342	9029	0.170099	31001	0.584032	39585	0.745747	36000	0.678209	40698	0.766715	40601	0.764888	38201	0.719674	34124	0.642867	38808	0.731109	40817	0.768957	38308	0.721689	40230	0.757898	41261	0.777321	37461	0.705733	37647	0.709237
	G4-seq	86768	0.121132	248702	0.347198	165539	0.231099	133929	0.18697	42544	0.0593932	716311	1	11371	0.0158744	44193	0.0616953	72602	0.101355	124530	0.173849	151509	0.211513	144683	0.201983	173127	0.241693	162165	0.226389	150834	0.210571	134079	0.18718	143814	0.20077	157424	0.21977	147709	0.206208	164715	0.229949	164980	0.230319	154636	0.215878	133681	0.186624
	G4-ChIP	6341	0.708096	3516	0.39263	6903	0.770854	3470	0.387493	748	0.0835288	7453	0.832272	8955	1	8777	0.980123	6365	0.710776	6819	0.761474	7048	0.787046	6928	0.773646	7049	0.787158	7022	0.784143	6897	0.770184	6935	0.774428	6851	0.765047	6981	0.779564	6885	0.768844	6864	0.766499	6890	0.769403	6853	0.765271	6984	0.779899
	Cut&Tag	11516	0.629703	10614	0.580381	14353	0.784832	9840	0.538058	3678	0.201115	14418	0.788386	7867	0.430173	18288	1	10307	0.563594	12932	0.70713	13356	0.730315	13175	0.720418	13748	0.75175	13560	0.74147	13311	0.727854	13252	0.724628	13059	0.714075	13440	0.734908	13209	0.722277	13463	0.736166	13419	0.73376	13313	0.727964	13085	0.715497
	KAS-seq	11300	0.308667	12255	0.334754	14145	0.38638	9631	0.263077	3191	0.0871644	19870	0.542763	5546	0.151493	9611	0.262531	36609	1	13235	0.361523	13862	0.37865	13821	0.37753	14766	0.403343	14341	0.391734	13948	0.380999	13498	0.368707	13618	0.371985	14200	0.387883	13877	0.37906	14354	0.392089	14302	0.390669	14135	0.386107	13397	0.365948
DeepGQ	Adipocyte	139622	0.622681	61304	0.273402	181606	0.80992	59812	0.266748	29140	0.129958	182117	0.812199	12685	0.0565721	62720	0.279717	62745	0.279828	224227	1	193073	0.86106	183558	0.818626	200793	0.89549	199116	0.888011	188370	0.840086	178258	0.794989	184727	0.823839	193504	0.862983	190955	0.851615	193325	0.862184	195747	0.872986	188589	0.841063	183698	0.81925
	Bone	137707	0.467074	78528	0.266351	223193	0.757025	76287	0.25875	36952	0.125334	236436	0.801943	13134	0.0445479	68773	0.233264	75422	0.255816	188963	0.640924	294829	1	229472	0.778322	259035	0.878594	257094	0.872011	238349	0.808431	220678	0.748495	230967	0.783393	246749	0.836922	238117	0.807644	248368	0.842414	251048	0.851504	235535	0.798887	230585	0.782097
	Breast	139738	0.503248	72317	0.26044	212299	0.764568	70421	0.253612	33808	0.121755	220456	0.793944	12919	0.0465261	65036	0.234219	71265	0.256652	182092	0.655781	231848	0.834971	277672	1	244428	0.880276	243067	0.875375	224979	0.810233	211701	0.762414	222506	0.801327	232358	0.836807	226996	0.817497	233873	0.842264	237657	0.855891	227447	0.819121	215696	0.776801
	Cardiovascular	138802	0.396968	85363	0.244135	243691	0.696947	81511	0.233118	38063	0.108859	268020	0.766527	13152	0.0376142	70990	0.203029	82411	0.235692	197276	0.564202	259400	0.741874	242319	0.693023	349655	1	273102	0.781061	255021	0.72935	232306	0.664386	241202	0.689829	266769	0.762949	252197	0.721274	271621	0.776826	274578	0.785283	253599	0.725283	233047	0.666506
	Digestive_tract	138320	0.427801	83753	0.259034	236455	0.731316	80622	0.249351	38060	0.117713	252654	0.781417	13049	0.0403584	70232	0.217216	80226	0.248126	195372	0.604253	257133	0.79527	240831	0.74485	272860	0.843911	323328	1	246569	0.762597	226451	0.700375	239790	0.741631	256690	0.7939	246638	0.762811	260016	0.804186	264459	0.817928	248553	0.768733	234321	0.724716
	Epidermis	138855	0.47694	78185	0.268551	220838	0.758536	75229	0.258397	35745	0.122777	230371	0.79128	12762	0.043835	66420	0.22814	73036	0.250865	185819	0.638253	239567	0.822867	223828	0.768806	255974	0.879222	247569	0.850352	291137	1	219681	0.754562	224721	0.771874	243378	0.835957	232136	0.797343	248144	0.852327	247791	0.851115	232647	0.799098	219720	0.754696
	Kidney	138646	0.538067	66426	0.257791	201314	0.781274	65056	0.252474	31950	0.123994	204834	0.794935	12895	0.0500439	64248	0.249338	69025	0.267877	175734	0.682001	222143	0.862109	210534	0.817056	233321	0.905489	227684	0.883613	219713	0.852678	257674	1	209942	0.814758	223702	0.868159	215131	0.834896	225783	0.876235	227164	0.881595	215208	0.835195	208033	0.80735
	Liver	138794	0.515415	77238	0.286825	213021	0.791059	75054	0.278715	36296	0.134786	218213	0.810339	12627	0.0468907	64117	0.2381	69787	0.259156	182479	0.67764	232607	0.863792	221644	0.82308	242481	0.900459	241158	0.895546	225100	0.835914	210210	0.78062	269286	1	231941	0.861318	228510	0.848577	233560	0.867331	237420	0.881665	226690	0.841819	215542	0.80042
	Lung	139581	0.457388	83621	0.274014	231887	0.759862	80543	0.263928	38170	0.125078	242121	0.793397	13071	0.0428319	68735	0.225235	76112	0.249409	191522	0.627591	248908	0.815637	231996	0.760219	268763	0.880699	258777	0.847977	244235	0.800324	224467	0.735547	232439	0.761671	305170	1	239691	0.785434	256839	0.841626	262604	0.860517	241356	0.79089	226674	0.742779
	Muscle	139074	0.486179	76572	0.267683	218819	0.764954	74042	0.258838	35730	0.124906	228410	0.798483	12821	0.0448201	66520	0.232543	72791	0.254465	188111	0.657604	239472	0.837154	225828	0.789457	253159	0.885001	247881	0.86655	232197	0.811722	215170	0.752198	228161	0.797612	238796	0.834791	286055	1	241317	0.843604	244375	0.854294	232817	0.813889	220673	0.771436
	Neural	139385	0.432216	84392	0.26169	235009	0.728735	80610	0.249962	37738	0.117021	251677	0.78042	12653	0.0392354	67575	0.209542	77326	0.239779	191241	0.593016	250151	0.775688	233153	0.72298	273152	0.847012	261744	0.811637	248688	0.771152	226248	0.701568	233777	0.724915	256405	0.795081	241909	0.750131	322489	1	263695	0.817687	243779	0.75593	225851	0.700337
	Pancreas	138302	0.43534	85215	0.268236	236342	0.743946	81968	0.258015	38528	0.121277	249981	0.786878	12688	0.0399387	68055	0.21422	77197	0.242997	192482	0.605886	251334	0.791137	235504	0.741308	274518	0.864115	264622	0.832965	246833	0.776969	226233	0.712125	236103	0.743194	260658	0.820487	243436	0.766276	262080	0.824963	317687	1	245575	0.773009	226293	0.712314
	Prostate	138193	0.469843	77735	0.264291	221583	0.753361	74764	0.25419	35061	0.119204	231016	0.785432	12671	0.0430802	66138	0.224863	73445	0.249706	185713	0.631406	236522	0.804152	225861	0.767906	254008	0.863603	249238	0.847385	232229	0.789556	214853	0.730479	225987	0.768334	240099	0.816313	232392	0.79011	242813	0.825541	246100	0.836716	294126	1	216858	0.737296
	Uterus	139113	0.533585	71213	0.273146	204480	0.784308	70020	0.26857	35065	0.134496	212064	0.813397	13188	0.0505842	67462	0.258759	70853	0.271765	180704	0.693112	231859	0.889323	214398	0.822349	233806	0.896791	235401	0.902909	219507	0.841946	207803	0.797053	215027	0.824762	225632	0.865439	220535	0.845889	225192	0.863751	226989	0.870644	217102	0.832721	260714	1

## Sheet: without core
Number and share of overlaps between different G4 datasets
		DeepGQ		pattern		EndoQuad		G4-DNABERT		KEx		G4-seq		G4-ChIP		Cut&Tag		KAS-seq		Adipocyte		bone		breast		cardiovascular		digestive_tract		epidermis		kidney		liver		lung		muscle		neural		pancreas		prostate		uterus
	to from	n	%	n	%	n	%	n	%	n	%	n	%	n	%	n	%	n	%	n	%	n	%	n	%	n	%	n	%	n	%	n	%	n	%	n	%	n	%	n	%	n	%	n	%	n	%
	DeepGQ	124618	100	42776	34.3	115871	93	43066	34.6	22065	17.7	106781	85.7	10209	8.2	43056	34.6	41085	33	0	0	0	0	0	0	0	0	0	0	0	0	0	0	0	0	0	0	0	0	0	0	0	0	0	0	0	0
	pattern	49139	13.3	369672	100	96436	26.1	175622	47.5	53061	14.4	273184	73.9	5202	1.4	28147	7.6	36340	9.8	17682	4.8	35386	9.6	29041	7.9	42146	11.4	40668	11	34992	9.5	22944	6.2	33940	9.2	40353	10.9	33360	9	41078	11.1	42167	11.4	34438	9.3	27953	7.6
	EndoQuad	167641	42.8	102966	26.3	391503	100	95365	24.4	46358	11.8	318883	81.5	16351	4.2	91525	23.4	97078	24.8	57277	14.6	106492	27.2	94226	24.1	128472	32.8	120697	30.8	104133	26.6	81096	20.7	94901	24.2	114225	29.2	100726	25.7	116915	29.9	121726	31.1	104249	26.6	86114	22
	G4-DNABERT	49452	27.2	176626	97.2	89099	49	181737	100	52519	28.9	148416	81.7	5152	2.8	26541	14.6	28509	15.7	15938	8.8	32854	18.1	26701	14.7	38027	20.9	37210	20.5	31648	17.4	21274	11.7	31466	17.3	37034	20.4	30527	16.8	37054	20.4	38612	21.2	31163	17.1	26454	14.6
	KEx	25187	47.5	53081	100	42906	80.8	52544	99	53081	100	47525	89.5	1183	2.2	9095	17.1	9029	17	6607	12.4	14610	27.5	11278	21.2	15671	29.5	15655	29.5	13281	25	9469	17.8	13864	26.1	15748	29.7	13305	25.1	15268	28.8	16196	30.5	12581	23.7	12635	23.8
	G4-seq	86768	12.1	248702	34.7	165539	23.1	133929	18.7	42544	5.9	716311	100	11371	1.6	44193	6.2	72602	10.1	57658	8	96856	13.5	85184	11.9	120057	16.8	108286	15.1	92948	13	73983	10.3	84202	11.8	101139	14.1	90873	12.7	107906	15.1	108978	15.2	96028	13.4	77761	10.9
	G4-ChIP	6341	70.8	3516	39.3	6903	77.1	3470	38.7	748	8.4	7453	83.2	8955	100	8777	98	6365	71.1	1328	14.8	1917	21.4	1530	17.1	1832	20.5	1753	19.6	1460	16.3	1560	17.4	1376	15.4	1697	19	1576	17.6	1407	15.7	1481	16.5	1400	15.6	1819	20.3
	Cut&Tag	11516	63	10614	58	14353	78.5	9840	53.8	3678	20.1	14418	78.8	7867	43	18288	100	10307	56.4	7875	43.1	10054	55	8413	46	10532	57.6	10272	56.2	9100	49.8	8491	46.4	8182	44.7	9880	54	9172	50.2	9314	50.9	9611	52.6	9101	49.8	9506	52
	KAS-seq	11300	30.9	12255	33.5	14145	38.6	9631	26.3	3191	8.7	19870	54.3	5546	15.1	9611	26.3	36609	100	7921	21.6	10016	27.4	8895	24.3	10999	30	10523	28.7	9332	25.5	8551	23.4	8508	23.2	10078	27.5	9401	25.7	9820	26.8	9949	27.2	9564	26.1	9238	25.2
DeepGQ without core	Adipocyte	0	0	17139	20.3	52723	62.3	15383	18.2	6391	7.6	62284	73.6	1506	1.8	13112	15.5	17568	20.8	84605	100	54188	64	45152	53.4	61742	73	60117	71.1	49735	58.8	39931	47.2	46266	54.7	54810	64.8	52050	61.5	54724	64.7	56933	67.3	50090	59.2	44790	52.9
	Bone	0	0	34227	21.8	96626	61.5	31715	20.2	14068	9	118075	75.1	2187	1.4	20837	13.3	30939	19.7	54121	34.4	157122	100	93223	59.3	122140	77.7	120254	76.5	101885	64.8	84510	53.8	94772	60.3	110314	70.2	101549	64.6	111868	71.2	114448	72.8	99374	63.2	93837	59.7
	Breast	0	0	27768	20.1	83644	60.6	25599	18.6	10897	7.9	100349	72.8	1749	1.3	15648	11.3	26110	18.9	45040	32.7	92963	67.4	137934	100	105342	76.4	104128	75.5	86399	62.6	73318	53.2	84097	61	93750	68	88175	63.9	95307	69.1	98912	71.7	89031	64.5	76840	55.7
	Cardiovascular	0	0	40840	19.4	116282	55.1	36719	17.4	15104	7.2	148735	70.5	2105	1	22348	10.6	37511	17.8	61569	29.2	121740	57.7	105207	49.9	210853	100	135430	64.2	117707	55.8	95221	45.2	104186	49.4	129405	61.4	114629	54.4	134250	63.7	137024	65	116523	55.3	95406	45.2
	Digestive_tract	0	0	39308	21.2	109316	59.1	35906	19.4	15135	8.2	133760	72.3	2023	1.1	21719	11.7	35462	19.2	59878	32.4	119807	64.8	103990	56.2	135324	73.1	185008	100	109566	59.2	89723	48.5	103004	55.7	119656	64.7	109407	59.1	123034	66.5	127273	68.8	111739	60.4	96963	52.4
	Epidermis	0	0	33663	22.1	92976	61.1	30446	20	12827	8.4	111042	72.9	1652	1.1	17492	11.5	28123	18.5	49593	32.6	101547	66.7	86374	56.7	117747	77.3	109554	71.9	152282	100	82204	54	87282	57.3	105621	69.4	94241	61.9	110396	72.5	109874	72.2	95119	62.5	81734	53.7
	Kidney	0	0	22168	18.6	73826	62	20524	17.2	9150	7.7	85716	72	1787	1.5	15367	12.9	24069	20.2	39847	33.5	84428	70.9	73312	61.6	95381	80.1	89975	75.6	82289	69.1	119028	100	72756	61.1	86281	72.5	77604	65.2	88370	74.2	89607	75.3	78033	65.6	70337	59.1
	Liver	0	0	32710	25.1	85047	65.2	30261	23.2	13364	10.2	98988	75.9	1546	1.2	15042	11.5	24866	19.1	46169	35.4	94593	72.5	84069	64.4	104277	79.9	103116	79	87326	66.9	72695	55.7	130492	100	94154	72.2	90511	69.4	95826	73.4	99487	76.2	89045	68.2	77586	59.5
	Lung	0	0	38904	23.5	103400	62.4	35554	21.5	15116	9.1	122156	73.8	1942	1.2	19731	11.9	31016	18.7	54745	33.1	110268	66.6	93856	56.7	129781	78.4	120111	72.5	105861	63.9	86388	52.2	94331	57	165589	100	101101	61.1	118327	71.5	123923	74.8	103194	62.3	88049	53.2
	Muscle	0	0	32075	21.8	90945	61.9	29285	19.9	12781	8.7	108886	74.1	1773	1.2	17707	12	27798	18.9	51905	35.3	101390	69	88265	60.1	114836	78.1	109725	74.7	94425	64.2	77663	52.8	90559	61.6	100977	68.7	146981	100	103570	70.5	106426	72.4	95198	64.8	82611	56.2
	Neural	0	0	39763	21.7	106588	58.2	35716	19.5	14734	8	131832	72	1602	0.9	18571	10.1	32302	17.6	54591	29.8	111658	61	95198	52	134389	73.4	123236	67.3	110447	60.3	88296	48.2	95810	52.3	118051	64.5	103520	56.5	183104	100	125205	68.4	105781	57.8	87423	47.7
	Pancreas	0	0	40661	22.7	108898	60.7	37158	20.7	15568	8.7	131152	73.1	1683	0.9	19395	10.8	32461	18.1	56737	31.6	113927	63.5	98595	55	136823	76.3	127145	70.9	109658	61.1	89336	49.8	99213	55.3	123357	68.8	106072	59.1	124874	69.6	179385	100	108679	60.6	88937	49.6
	Prostate	0	0	33336	21.4	94155	60.4	30088	19.3	12189	7.8	112267	72	1590	1	17392	11.2	28670	18.4	49916	32	99111	63.6	88896	57	116425	74.7	111761	71.7	95062	61	77944	50	88984	57.1	102943	66	94999	60.9	105684	67.8	108816	69.8	155933	100	79480	51
	Uterus	0	0	26749	22	76834	63.2	25283	20.8	12097	9.9	92509	76.1	2093	1.7	18672	15.4	25840	21.2	44653	36.7	93766	77.1	76955	63.3	95610	78.6	97310	80	81867	67.3	70392	57.9	77635	63.8	87969	72.3	82691	68	87580	72	89250	73.4	79638	65.5	121601	100
