# Supplementary material for: Deep Learning Deciphers the Related Role of Master Regulators and G-Quadruplexes in Tissue Specification
Source: Research Square preprint supplement (doi:10.21203/rs.3.rs-6165621/v1), 2025-03-11
Supplement: Supplementary file 1 [file 09fd87f3c0cedf0b41fc5c7e.pdf]

## Architecture of the best DeepGQ model

The best RNN-based architecture:

- LSTM(in\_features, 250, num\_layers=2, bidirectional=True)
- Dropout(p=0.5)
- Linear(in\_features=500, out\_features=250)
- ReLU()
- Dropout(p=0.5)
- Linear(in\_features=250, out\_features=2)

in\_features parameter within the first LSTM layer varies from tissue to tissue and equals to OHE sequence width (4) plus number of omics features for the relevant tissue.
