# Supplementary material for: Deep Learning Deciphers the Related Role of Master Regulators and G-Quadruplexes in Tissue Specification
Source: Research Square preprint supplement (doi:10.21203/rs.3.rs-6165621/v1), 2025-03-11
Supplement: Supplementary file 2 [file 463da00a12342293e2d77abb.xlsx]

## Sheet: RNN Model metrics
Deep Learning Deciphers the Related Role of Master Regulators and G-Quadruplexes in Tissue Specification
	Artem Bashkatov, Andrey Andreasyan, Dmitry Konovalov, Alan Herbert, Maria Poptsova
Supplementary Table 2.			DeepGQ models metrics for 14 tissues
		Precision	Recall	IOU	F1	ROC AUC
	Liver	0.485	0.639	0.381	0.551	0.998
	Neural	0.505	0.637	0.392	0.563	0.998
	Lung	0.500	0.694	0.410	0.582	0.998
	Kidney	0.518	0.613	0.390	0.561	0.998
	Pancreas	0.509	0.655	0.401	0.573	0.998
	Prostate	0.484	0.653	0.385	0.556	0.998
	Bone	0.585	0.609	0.425	0.596	0.999
	Epidermis	0.497	0.641	0.389	0.560	0.998
	Uterus	0.518	0.578	0.376	0.546	0.997
	Digestive tract	0.525	0.720	0.436	0.607	0.999
	Cardiovascular	0.470	0.686	0.387	0.558	0.998
	Breast	0.482	0.626	0.374	0.544	0.998
	Muscle	0.520	0.637	0.401	0.572	0.998
	Adipocyte	0.561	0.591	0.404	0.576	0.998
