# Supplementary material for: Deep Learning Deciphers the Related Role of Master Regulators and G-Quadruplexes in Tissue Specification
Source: Research Square preprint supplement (doi:10.21203/rs.3.rs-6165621/v1), 2025-03-11
Supplement: Supplementary file 3 [file 7896a1ce1d8ce6afca643d9c.xlsx]

## Sheet: INFO
Deep Learning Deciphers the Related Role of Master Regulators and G-Quadruplexes in Tissue Specification
	Artem Bashkatov, Andrey Andreasyan, Dmitry Konovalov, Alan Herbert, Maria Poptsova
Supplementary Table 7.			Omics source data for 14 tissues
This document contains lists of omics data, including Antigens, Antigen types and Tissues for all the 14 tissues assessed in the study.

## Sheet: Neural
Antigen	Antigen class	Cell type class	Accession ID
OTX2	TFs and others	Neural	SRX2436021, SRX2436022, SRX2436029, SRX2436030, SRX2436037, SRX2436039, SRX2436041, SRX2436043, SRX2436046, SRX2436048, SRX2436050, SRX2436052, SRX2436059, SRX2436060, SRX2769830, SRX814231
ARNTL	TFs and others	Neural	SRX10976981, SRX10976982, SRX6602360, SRX6602361, SRX6602363, SRX6602364, SRX6602366, SRX6602367, SRX6602369, SRX6602370
STAG2	TFs and others	Neural	SRX15710579, SRX15710580, SRX15710581, SRX21381192, SRX21381193
H2AK119ub	Histone	Neural	SRX16016294, SRX16016295, SRX16016296, SRX16016297, SRX16016298, SRX16016299, SRX3145958, SRX3145961, SRX3145964, SRX3145967, SRX5727037, SRX5727038, SRX5727045, SRX5727046, SRX7196716, SRX7196719, SRX7196722, SRX7196725
LHX2	TFs and others	Neural	SRX814234
TFAP2A	TFs and others	Neural	SRX13439346
TEAD1	TFs and others	Neural	SRX716558, SRX716559
TEAD4	TFs and others	Neural	SRX190314, SRX1948680, SRX7695532, SRX7695533, SRX7695536, SRX7695537
PITX3	TFs and others	Neural	SRX2470089
OLIG2	TFs and others	Neural	SRX5600888, SRX5600889, SRX5600890, SRX5600891, SRX5600892, SRX5600893, SRX5600894, SRX5600895, SRX5600896, SRX5600897, SRX5600898
H3K9me3	Histone	Neural	DRX002909, DRX002913, DRX002916, SRX10187726, SRX10187727, SRX11016784, SRX11016785, SRX11016786, SRX11016787, SRX11016788, SRX11016789, SRX11016790, SRX11016791, SRX11016792, SRX11016793, SRX11016794, SRX11016795, SRX11016796, SRX11016797, SRX11016798, SRX11016799, SRX11159975, SRX11159976, SRX11159977, SRX11159978, SRX11159979, SRX11159980, SRX11161311, SRX11161312, SRX11161313, SRX11161314, SR…
ZNF8	TFs and others	Neural	SRX10977173, SRX10977174
HAND2	TFs and others	Neural	SRX12172285, SRX12172287, SRX12172290, SRX12172293, SRX12172304, SRX12172308, SRX12172321, SRX12172322, SRX12172325, SRX12172327, SRX12172332, SRX12172333, SRX21236729, SRX21236730, SRX21236731, SRX2555289, SRX2555300, SRX2911578
H3.3 K27M mutant	Histone	Neural	SRX2009495, SRX2009496, SRX2009516, SRX2009517, SRX2009532, SRX6075145, SRX6075148, SRX6075151, SRX6075154, SRX6075157, SRX6075160
SUZ12	TFs and others	Neural	SRX15746422, SRX15746423, SRX15746424, SRX15746425, SRX2009523, SRX2009524, SRX5759189, SRX5759190, SRX5759191, SRX5759192, SRX5759193, SRX5759194, SRX8030652, SRX8030657, SRX8030662, SRX8030677, SRX8030678, SRX8030692, SRX8030705, SRX8030715, SRX8713992, SRX8713993, SRX8713994, SRX8713995
CHAT	TFs and others	Neural	SRX1295733, SRX1295734
E2F1	TFs and others	Neural	SRX1036433, SRX11051023, SRX11051041, SRX11051042
SIN3A	TFs and others	Neural	SRX190237, SRX190272
RNA polymerase II	RNA polymerase	Neural	SRX099886, SRX099887, SRX100504, SRX10081215, SRX10081216, SRX10081217, SRX10081218, SRX10081220, SRX10081221, SRX10081222, SRX10081223, SRX103001, SRX11120918, SRX11120919, SRX11120920, SRX11120921, SRX11248403, SRX11248404, SRX11705918, SRX11705919, SRX11926433, SRX11926434, SRX11998580, SRX11998581, SRX11998583, SRX11998584, SRX11998585, SRX11998586, SRX11998597, SRX11998598, SRX12172317, SRX1…
H2A.Z	Histone	Neural	SRX14636804, SRX14636805, SRX16811330, SRX16811331, SRX186695, SRX2635833, SRX2635834, SRX2636169, SRX2636170, SRX2636338, SRX2636339, SRX2636574, SRX2636575, SRX3146570, SRX3146571, SRX3146573, SRX3146574, SRX3146576, SRX3146577, SRX3146579, SRX3146580, SRX8584729, SRX9187726, SRX9187731, SRX9187732
H3K36me1	Histone	Neural	SRX11016704, SRX11016705, SRX11016706, SRX11016707, SRX11016708, SRX11016709, SRX11016710, SRX11016711, SRX11016712, SRX11016713, SRX11016714, SRX11016715, SRX11016716, SRX11016717, SRX11016718, SRX11016719
CHD2	TFs and others	Neural	SRX5457393, SRX5457394
FOXC1	TFs and others	Neural	SRX11998943, SRX11998944, SRX11998946, SRX15225446, SRX15225447, SRX15225448, SRX15225449, SRX15225450, SRX15225451
RBPJ	TFs and others	Neural	SRX2242953, SRX2242954, SRX2242955
GTF3C5	TFs and others	Neural	SRX1616411, SRX1616412
RNF2	TFs and others	Neural	SRX10823677, SRX10823678, SRX15746418, SRX15746419, SRX15746420, SRX15746421, SRX16016300, SRX16016301, SRX16016302, SRX16016303, SRX16016304, SRX16016305
RCOR1	TFs and others	Neural	SRX3322045, SRX3322046
H3K36me2	Histone	Neural	SRX11016720, SRX11016721, SRX11016722, SRX11016723, SRX11016724, SRX11016725, SRX11016726, SRX11016727, SRX11016728, SRX11016729, SRX11016730, SRX11016731, SRX11016732, SRX11016733, SRX11016734, SRX11016735, SRX4599943, SRX4599949, SRX4599951, SRX8030649, SRX8030667, SRX8030670, SRX8030680, SRX8030688, SRX8030702, SRX8030710, SRX8030720, SRX8030726, SRX8030729, SRX8030738, SRX8030740, SRX8030747,…
H3K4me2	Histone	Neural	SRX11016672, SRX11016673, SRX11016674, SRX11016675, SRX11016676, SRX11016677, SRX11016678, SRX11016679, SRX11016680, SRX11016681, SRX11016682, SRX11016683, SRX11016684, SRX11016685, SRX11016686, SRX11016687, SRX14178597, SRX14178598, SRX186729, SRX2166918, SRX2166919, SRX2166920, SRX2166921, SRX2166922, SRX2166923, SRX2166924, SRX2630134, SRX2630135, SRX2630136, SRX2636104, SRX2636105, SRX2636106…
CHD8	TFs and others	Neural	SRX1683031, SRX534844, SRX534845
H3K27ac	Histone	Neural	SRX067514, SRX10162628, SRX10162629, SRX10162630, SRX10162634, SRX10162635, SRX10162636, SRX10162640, SRX10162641, SRX10162642, SRX1023259, SRX1023262, SRX1023265, SRX10445277, SRX10445278, SRX10445279, SRX10445280, SRX10445288, SRX10445298, SRX10445307, SRX10615505, SRX10976112, SRX10976113, SRX10976133, SRX10976134, SRX10976149, SRX10976150, SRX10976156, SRX10976157, SRX10976527, SRX10976528, S…
INTS13	TFs and others	Neural	SRX20140894, SRX20140895, SRX20140896, SRX20140897, SRX20140900, SRX20140901
SMARCC1	TFs and others	Neural	SRX1123853, SRX1123855, SRX2527759, SRX2527760, SRX2527761
FANCD2	TFs and others	Neural	SRX11998588, SRX11998589, SRX11998592, SRX11998593, SRX11998594, SRX11998595
BRD4	TFs and others	Neural	SRX10170781, SRX10170782, SRX10170783, SRX10170784, SRX11823556, SRX14178589, SRX14178591, SRX1690201, SRX2009509, SRX2009510, SRX204914, SRX2166885, SRX2166886, SRX2166887, SRX2166888, SRX2166889, SRX3124391, SRX3124392, SRX3124405, SRX3124406, SRX3124417, SRX3124418, SRX327751, SRX327752, SRX4326271, SRX4326272, SRX4326273, SRX4326274, SRX4779783, SRX4779784, SRX4779785, SRX4779786, SRX4779787,…
Epitope tags	TFs and others	Neural	SRX10989726, SRX10989727, SRX11051004, SRX11051005, SRX11051006, SRX11051007, SRX11051008, SRX11051009, SRX11051010, SRX11051011, SRX11051012, SRX11051013, SRX11051014, SRX11051015, SRX11051016, SRX11051017, SRX11051018, SRX11051019, SRX11051020, SRX11051028, SRX11051035, SRX11051036, SRX11051037, SRX11051038, SRX11051039, SRX11051040, SRX11051043, SRX11051044, SRX11410600, SRX11410601, SRX114106…
ELF1	TFs and others	Neural	SRX190207
ARID1B	TFs and others	Neural	SRX10445270, SRX10445272, SRX10445274, SRX10445313, SRX10445314, SRX11857209, SRX11857215, SRX11857222
ATF4	TFs and others	Neural	SRX13113011, SRX13781786, SRX14984975, SRX14984978, SRX5600876, SRX5600877, SRX5600878, SRX5600879, SRX5600880, SRX5600881, SRX5600882, SRX5600883, SRX5600884, SRX5600885, SRX5600886, SRX5600887
WDR5	TFs and others	Neural	SRX16322774, SRX16322775, SRX16322844, SRX16322845, SRX6764996, SRX6764997, SRX6764998
ERG	TFs and others	Neural	SRX11094512
H3K27me3	Histone	Neural	DRX002910, DRX002914, DRX002917, DRX248835, DRX248837, SRX067480, SRX10187490, SRX10187491, SRX10187775, SRX10976231, SRX10976232, SRX10976253, SRX10976254, SRX10976255, SRX10976256, SRX10976257, SRX10976384, SRX10976385, SRX10976406, SRX10976407, SRX10976418, SRX10976419, SRX10976420, SRX10976421, SRX10976532, SRX10976533, SRX10976611, SRX10976612, SRX10976759, SRX10976760, SRX10976768, SRX10976…
H3K4me3	Histone	Neural	DRX223745, DRX223749, DRX223753, SRX017324, SRX019331, SRX019332, SRX019333, SRX019334, SRX019335, SRX019336, SRX019337, SRX019338, SRX019339, SRX019340, SRX019341, SRX019342, SRX019343, SRX019344, SRX067498, SRX10001296, SRX10001297, SRX10001298, SRX10001299, SRX10001300, SRX10001301, SRX10001348, SRX10001349, SRX10001350, SRX10001351, SRX10001352, SRX10001353, SRX10162625, SRX10162626, SRX10162…
SMC1A	TFs and others	Neural	SRX4155658, SRX4155659, SRX4155668, SRX4155669, SRX7890964, SRX7890965, SRX7890966, SRX7890967
MEF2A	TFs and others	Neural	SRX190290
H3.3	Histone	Neural	DRX197959, DRX197961, DRX223747, DRX223748, DRX223751, DRX223752, SRX2009495, SRX2009496, SRX2009511, SRX2009512, SRX2009516, SRX2009517, SRX2009522, SRX2009532, SRX2009534, SRX2630218, SRX2630219, SRX2636056, SRX2636057, SRX2636181, SRX2636182, SRX2636444, SRX2636445, SRX5678409, SRX5678410, SRX5678411, SRX5678412, SRX5678413, SRX5678422, SRX5678423, SRX5678424, SRX6075144, SRX6075145, SRX607514…
H3K36me3	Histone	Neural	SRX067502, SRX10187587, SRX10187588, SRX11016736, SRX11016737, SRX11016738, SRX11016739, SRX11016740, SRX11016741, SRX11016742, SRX11016743, SRX11016744, SRX11016745, SRX11016746, SRX11016747, SRX11016748, SRX11016749, SRX11016750, SRX11016751, SRX11159828, SRX11159829, SRX11159830, SRX11159831, SRX11159832, SRX11159833, SRX11160764, SRX11160765, SRX11162085, SRX11162086, SRX11162087, SRX11162088…
H3K27me1	Histone	Neural	SRX16660395, SRX8030642, SRX8030647, SRX8030665, SRX8030674, SRX8030684, SRX8030696, SRX8030700, SRX8030719, SRX8030725, SRX8030734, SRX8030741, SRX8030748
ZNF70	TFs and others	Neural	SRX10976772, SRX10976773
GATA3	TFs and others	Neural	SRX1023260, SRX1023263, SRX12172282, SRX12172284, SRX12172298, SRX12172299, SRX12172300, SRX12172306, SRX12172310, SRX150646, SRX190194, SRX21236724, SRX21236725, SRX21236727, SRX2555291, SRX2555304, SRX2911577, SRX4723357, SRX4723358, SRX4723359, SRX866612, SRX866613, SRX866614
ISL1	TFs and others	Neural	SRX16495323, SRX16495324, SRX21236733, SRX21236734, SRX21236735, SRX21236736, SRX2555293, SRX2555296
RFX5	TFs and others	Neural	SRX186634
BRD2	TFs and others	Neural	SRX2009507, SRX2009508, SRX2009518, SRX2009519, SRX4779795, SRX4779796, SRX4779797, SRX4779798, SRX4779799, SRX4779800
H4K5ac	Histone	Neural	SRX20550191, SRX20550192, SRX20550193, SRX20550194, SRX20550195, SRX20550196
MAU2	TFs and others	Neural	SRX11120922, SRX11120923, SRX14178556, SRX14178580, SRX15710569, SRX15710570, SRX15710571, SRX15710572
ASCL1	TFs and others	Neural	SRX21236716, SRX21236717, SRX21236718, SRX21236719, SRX4990371, SRX8538895, SRX8538897, SRX8670123, SRX8670124, SRX8670125, SRX8670126, SRX8670127, SRX8670128, SRX8670129, SRX8670130, SRX8670134, SRX8670135, SRX8670136, SRX9309558
BNC2	TFs and others	Neural	SRX10976820, SRX10976821
H4R3me2	Histone	Neural	SRX19788731, SRX19788732, SRX19788733, SRX19788734, SRX19788735, SRX19788736, SRX19788737, SRX19788738, SRX19788739
AFF4	TFs and others	Neural	SRX14178573, SRX14178574, SRX14535230, SRX14535231, SRX14535252, SRX14535253, SRX14535278, SRX14535279
DYRK1A	TFs and others	Neural	SRX769982, SRX769983, SRX8899546, SRX8899547, SRX8899548
ARID1A	TFs and others	Neural	SRX10445297, SRX10445306, SRX11857202, SRX11857211, SRX8363485
CPSF3L	TFs and others	Neural	SRX20140879, SRX20140880, SRX20140881, SRX20140882, SRX20140885, SRX20140886
ZNF143	TFs and others	Neural	SRX6977272
PHOX2B	TFs and others	Neural	SRX12172281, SRX12172283, SRX12172288, SRX12172291, SRX12172294, SRX12172305, SRX12172309, SRX21236741, SRX21236743, SRX2555287, SRX2911576, SRX3542259
LIN28B	TFs and others	Neural	SRX6977270, SRX6977274, SRX6977276
TOP2B	TFs and others	Neural	SRX6365880, SRX6365881, SRX6365882, SRX6365883, SRX6433358, SRX6433359, SRX6433361, SRX6433362, SRX6433364, SRX6433365, SRX6433369, SRX9318375, SRX9318376, SRX9318377, SRX9318378, SRX9318379, SRX9318380, SRX9318381, SRX9318382, SRX9318383, SRX9318386, SRX9318388, SRX9318390, SRX9318392, SRX9318394, SRX9318396
H4K20me3	Histone	Neural	SRX2039660, SRX2039661, SRX2039662, SRX2039663, SRX2039664, SRX2039665, SRX2039666, SRX2039667, SRX2039668, SRX2039669, SRX2039670, SRX2039671, SRX7556195, SRX7556196, SRX7556197, SRX7556198, SRX7556199, SRX7556200, SRX8848830, SRX8848831, SRX8848832, SRX8848833, SRX8848834, SRX8848835
EP300	TFs and others	Neural	SRX018278, SRX018279, SRX018282, SRX100540, SRX10162654, SRX10162655, SRX10162656, SRX10162657, SRX186631, SRX190219, SRX209673, SRX3322628, SRX3322659, SRX5457436, SRX5457437, SRX9309560, SRX9309562
USF2	TFs and others	Neural	SRX3322809, SRX3322810
ETS1	TFs and others	Neural	SRX16121710, SRX16121711, SRX16121712, SRX16121713
H3K79me2	Histone	Neural	SRX10976403, SRX10976404, SRX186686, SRX2630164, SRX2630165, SRX2635949, SRX2635950, SRX2635970, SRX2635971, SRX7027278, SRX7027284, SRX7027290, SRX7267236, SRX7267243, SRX7267250, SRX7267257, SRX7267264, SRX7267271, SRX7267278, SRX7267285, SRX7267292, SRX7267299
FLI1	TFs and others	Neural	SRX11094507, SRX11094572, SRX9738654, SRX9738655, SRX9738663, SRX9738664
MED1	TFs and others	Neural	SRX11120924, SRX11120925, SRX129090, SRX14178599
MYC	TFs and others	Neural	SRX099884, SRX099885, SRX12837598, SRX12837599, SRX12837600, SRX129069, SRX2144103, SRX2144104, SRX2144111, SRX2144112, SRX2555292, SRX4409572, SRX4409573, SRX6935372, SRX6935378, SRX6935381, SRX6935383, SRX9836185, SRX9836186
TCF12	TFs and others	Neural	SRX190356
HOXC9	TFs and others	Neural	SRX111320, SRX111321
H4K20me1	Histone	Neural	SRX12162832, SRX186721, SRX2636256, SRX2636257, SRX2636423, SRX2636424, SRX2636427, SRX2636428, SRX2636536, SRX2636537, SRX4910589, SRX4910590
GTF3C2	TFs and others	Neural	SRX4714467, SRX4714469, SRX4714482
AFF1	TFs and others	Neural	SRX14535250, SRX14535251, SRX17584621, SRX17584622, SRX17584623, SRX17584624
NFKB2	TFs and others	Neural	SRX16121706, SRX16121707, SRX16121708, SRX16121709, SRX16121714, SRX16121715, SRX16121716, SRX16121717
CTCFL	TFs and others	Neural	SRX3124389, SRX3124390, SRX3124403, SRX3124404, SRX3124415, SRX3124416, SRX4155648, SRX4155649, SRX4155656, SRX4155657, SRX4155660, SRX4155661
DNA-RNA hybrid	TFs and others	Neural	SRX20083259, SRX20083260, SRX20083261, SRX20083262, SRX20083263, SRX20083264, SRX20083265, SRX20083266
TOP1	TFs and others	Neural	SRX17386580, SRX17386581, SRX17386582, SRX17386583, SRX17386584, SRX17386585, SRX17386586, SRX17386587
NFIB	TFs and others	Neural	SRX13439334, SRX13439344, SRX13439345
NANOG	TFs and others	Neural	SRX10445282, SRX10445290, SRX10445300, SRX10445309
NRF1	TFs and others	Neural	SRX186635
ZFP3	TFs and others	Neural	SRX10976177, SRX10976178
YAP1	TFs and others	Neural	SRX716555, SRX716556
RAD21	TFs and others	Neural	SRX100542, SRX11120907, SRX11120910, SRX11120911, SRX11120912, SRX11120913, SRX11120914, SRX12129617, SRX12129618, SRX12129620, SRX12129621, SRX12129624, SRX12129625, SRX12129627, SRX12129628, SRX12129630, SRX12129631, SRX12129633, SRX12129634, SRX12129636, SRX12129637, SRX14112536, SRX14112537, SRX14178557, SRX14178559, SRX14178562, SRX14178581, SRX14178583, SRX14178585, SRX1529432, SRX15710573,…
VSX2	TFs and others	Neural	SRX14036521, SRX14036523
YY1	TFs and others	Neural	SRX100543, SRX190353, SRX8901838, SRX8901839
MEF2C	TFs and others	Neural	SRX17812786, SRX17812788
CREBBP	TFs and others	Neural	SRX018277, SRX018280, SRX018281, SRX9309559, SRX9309561
STAG1	TFs and others	Neural	SRX11120915, SRX11120916, SRX15710578, SRX21381190, SRX21381191
TCF4	TFs and others	Neural	SRX11161903, SRX11161904, SRX2430641, SRX2661484, SRX2661486
ZFP30	TFs and others	Neural	SRX16498368, SRX16498369
H3K27me2	Histone	Neural	SRX5727035, SRX5727036, SRX5727043, SRX5727044, SRX8030645, SRX8030648, SRX8030654, SRX8030666, SRX8030675, SRX8030681, SRX8030687, SRX8030697, SRX8030701, SRX8030709, SRX8030716, SRX8030724, SRX8030728, SRX8030737, SRX8030742, SRX8030750, SRX8713984, SRX8713985, SRX8713986, SRX8713987, SRX8978171
ARID2	TFs and others	Neural	SRX6483127, SRX6483133, SRX6483139
BMI1	TFs and others	Neural	SRX109477, SRX109479, SRX109480, SRX109482, SRX7196715, SRX7196718, SRX7196721, SRX7196724, SRX9648512, SRX9648513, SRX9648514, SRX9648515
EBF3	TFs and others	Neural	SRX21236720, SRX21236721, SRX21236722, SRX2382329, SRX2382330, SRX2382331, SRX2382332, SRX2382333, SRX2382334
H3K27M	Histone	Neural	SRX9670387, SRX9670390, SRX9670391, SRX9670397, SRX9670398, SRX9670399, SRX9670400, SRX9670403, SRX9670428, SRX9670433, SRX9670434, SRX9670468
CASZ1	TFs and others	Neural	SRX11926429, SRX11926430
INTS10	TFs and others	Neural	SRX20140867, SRX20140868, SRX20140869, SRX20140870, SRX20140873, SRX20140874
NEUROD1	TFs and others	Neural	SRX2436023, SRX2436031, SRX2436056, SRX2436057, SRX2436058, SRX2436061, SRX2436062, SRX2436063
MEIS1	TFs and others	Neural	SRX8814865, SRX8814875
SOX2	TFs and others	Neural	SRX026880, SRX10445285, SRX10445293, SRX10445303, SRX10445312, SRX20140860, SRX20140861, SRX20140862, SRX20140890, SRX20140891, SRX20140892, SRX330107, SRX330108, SRX5716451, SRX5716452, SRX5716453
H3K9ac	Histone	Neural	SRX11016800, SRX11016801, SRX11016802, SRX11016803, SRX11016804, SRX11016805, SRX11016806, SRX11016807, SRX11016808, SRX11016809, SRX11016810, SRX11016811, SRX11016812, SRX11016813, SRX11016814, SRX11016815, SRX1166516, SRX1166518, SRX12162830, SRX186730, SRX2630197, SRX2630198, SRX2630200, SRX2630201, SRX2630224, SRX2630225, SRX2635996, SRX2635997, SRX3010099, SRX4005454, SRX4005455, SRX4799510,…
USF1	TFs and others	Neural	SRX100517, SRX190262
SMC3	TFs and others	Neural	SRX14178593, SRX186632, SRX5457527, SRX5457528
MECP2	TFs and others	Neural	SRX5064668, SRX5064669, SRX5064670, SRX5064671, SRX5291877, SRX5291878, SRX5291879, SRX5291880, SRX5291885, SRX5291886, SRX5291887, SRX5291888
TBX2	TFs and others	Neural	SRX2555295, SRX3542260
ZMYND8	TFs and others	Neural	SRX6911598, SRX6911600, SRX6911602, SRX6911604, SRX6911606, SRX6911608, SRX6911610, SRX6911612
REST	TFs and others	Neural	SRX100380, SRX100414, SRX100417, SRX10852916, SRX10852917, SRX10852920, SRX10852921, SRX190191, SRX190242, SRX4679525, SRX4679528, SRX7627558, SRX7627560, SRX7627562
ATAC-Seq	ATAC-Seq	Neural	ERX11464399, ERX11464400, ERX2408650, ERX4409407, ERX4409408, ERX4409409, ERX4409410, ERX9433907, ERX9433908, ERX9433909, ERX9433910, ERX9433911, ERX9433912, SRX10006801, SRX10006803, SRX10006804, SRX10031197, SRX10031198, SRX10031199, SRX10031200, SRX10031202, SRX10031203, SRX10031204, SRX10031205, SRX10031206, SRX10031207, SRX10231438, SRX10231439, SRX10231440, SRX10253495, SRX10253497, SRX1025…
JUND	TFs and others	Neural	SRX186637, SRX190357
HDGF2	TFs and others	Neural	SRX10809333, SRX10809335, SRX10809337, SRX10809339, SRX10809341, SRX13185689, SRX13185690, SRX13185691
FOSL2	TFs and others	Neural	SRX190296, SRX5054307, SRX5054308, SRX5054309
MAX	TFs and others	Neural	SRX129085, SRX14535248, SRX14535249, SRX190291
TAF1	TFs and others	Neural	SRX190226, SRX190229
PRRX1	TFs and others	Neural	SRX15235721, SRX15235724, SRX15235725, SRX15235743
CIC	TFs and others	Neural	SRX13262055
SMARCA4	TFs and others	Neural	SRX1123854, SRX1123856, SRX13385170, SRX13385171, SRX13385172, SRX13385173, SRX13385174, SRX13385175, SRX17428236, SRX2636404, SRX2636405, SRX5075168, SRX5075169, SRX5075170, SRX5075174, SRX5075175, SRX5075176, SRX5716463, SRX5716464, SRX5716469, SRX5716470, SRX6483126, SRX6483132, SRX6483138, SRX8363487
HIF1A	TFs and others	Neural	SRX10165738, SRX10165739, SRX10165740, SRX10165741, SRX10165742, SRX10165743
H3S10ph	Histone	Neural	SRX7635219, SRX7635221, SRX7635224, SRX7635226, SRX7635229, SRX7635231, SRX8548611, SRX8548612, SRX8548613, SRX8548614, SRX9689443, SRX9689444
KLF4	TFs and others	Neural	SRX2732458, SRX2732459, SRX2732460
H3K9K14ac	Histone	Neural	SRX2166930, SRX2166931, SRX2166932, SRX2166933, SRX2166934, SRX2166935
H3K9me2	Histone	Neural	SRX11016768, SRX11016769, SRX11016770, SRX11016771, SRX11016772, SRX11016773, SRX11016774, SRX11016775, SRX11016776, SRX11016777, SRX11016778, SRX11016779, SRX11016780, SRX11016781, SRX11016782, SRX11016783, SRX14636792, SRX14636793, SRX14636800, SRX14636801, SRX15682064, SRX17932391, SRX17932393, SRX17932395, SRX17932398, SRX17932399, SRX17932400, SRX17932403, SRX17932404, SRX17932405, SRX179324…
CTBP2	TFs and others	Neural	SRX7106589, SRX7106590, SRX7106593, SRX7106594
JUN	TFs and others	Neural	SRX11051031, SRX11051032, SRX11051045, SRX11051046
KDM1A	TFs and others	Neural	SRX757040, SRX757041, SRX757042, SRX757043, SRX757044, SRX757045, SRX757046
ATRX	TFs and others	Neural	SRX1592802, SRX4679522, SRX4679524, SRX4679527
TWIST1	TFs and others	Neural	SRX1690207, SRX1690217, SRX1690218, SRX1690227
ZEB1	TFs and others	Neural	SRX17812782, SRX17812784, SRX5457540
CEBPD	TFs and others	Neural	SRX7254949
MXI1	TFs and others	Neural	SRX186636, SRX5457529, SRX5457531
PBX3	TFs and others	Neural	SRX190343
THRA	TFs and others	Neural	SRX5600899, SRX5600900, SRX5600901, SRX5600902, SRX5600903, SRX5600904, SRX5600905, SRX5600906
HDAC2	TFs and others	Neural	SRX19212560, SRX20550182, SRX20550183, SRX20550184, SRX7643943
GATA2	TFs and others	Neural	SRX10474976, SRX10474977, SRX150668, SRX7254950
CRTC1	TFs and others	Neural	SRX6780855, SRX6780856
RARA	TFs and others	Neural	SRX1035586, SRX1035587, SRX1035588, SRX1035589, SRX10442515, SRX21236745, SRX21236746, SRX21236747, SRX21236748, SRX8814860, SRX8814876
H3	Histone	Neural	SRX3590869, SRX3590870, SRX3590871, SRX3590872, SRX3590873, SRX3590874, SRX5668254, SRX5668257, SRX5668260, SRX5668263, SRX5668266, SRX5668269, SRX5668274, SRX5668275, SRX5679767, SRX5679769, SRX7635218, SRX7635220, SRX7635223, SRX7635225, SRX7635228, SRX7635230, SRX8548619, SRX8548620, SRX8548621, SRX8548622, SRX9689439, SRX9689440, SRX9836182
TOX	TFs and others	Neural	SRX11165680, SRX11165681
CREB1	TFs and others	Neural	SRX6780853, SRX6780854, SRX6780861, SRX6780862
Crotonyllysine	TFs and others	Neural	SRX16357135, SRX16357138, SRX19488269, SRX19488272
RXRA	TFs and others	Neural	SRX190223
SMAD3	TFs and others	Neural	SRX20550185, SRX20550186, SRX20550187
GABPA	TFs and others	Neural	SRX190195
TFAP2B	TFs and others	Neural	SRX16499958, SRX16499959, SRX9309557
NFIC	TFs and others	Neural	SRX190336
THAP1	TFs and others	Neural	SRX12391708
H3K4me1	Histone	Neural	SRX067461, SRX10187660, SRX10187661, SRX11016622, SRX11016623, SRX11016624, SRX11016625, SRX11016626, SRX11016627, SRX11016628, SRX11016629, SRX11016630, SRX11016631, SRX11016632, SRX11016633, SRX11016634, SRX11016635, SRX11016670, SRX11016671, SRX11051025, SRX11051027, SRX11051047, SRX11051048, SRX11161023, SRX11161024, SRX11161025, SRX11161026, SRX11161027, SRX11161029, SRX11162119, SRX11162120…
H3K9me1	Histone	Neural	SRX11016752, SRX11016753, SRX11016754, SRX11016755, SRX11016756, SRX11016757, SRX11016758, SRX11016759, SRX11016760, SRX11016761, SRX11016762, SRX11016763, SRX11016764, SRX11016765, SRX11016766, SRX11016767
MYCN	TFs and others	Neural	SRX11705916, SRX11705917, SRX1178181, SRX12172275, SRX12172276, SRX12172277, SRX12172278, SRX12172286, SRX12172289, SRX12172292, SRX12172303, SRX12172307, SRX12172326, SRX12172330, SRX12172331, SRX12172336, SRX14535246, SRX14535247, SRX1616409, SRX1616410, SRX16322776, SRX16322777, SRX16322780, SRX16322781, SRX16322834, SRX16322835, SRX1690205, SRX1690210, SRX1690213, SRX1690216, SRX1690222, SRX1…
EZH2	TFs and others	Neural	SRX10475823, SRX10976091, SRX10976092, SRX186728, SRX19738542, SRX19738543, SRX19738544, SRX19738545, SRX2009501, SRX2009502, SRX2009503, SRX2009504, SRX2009525, SRX2009526, SRX2011490, SRX2011494, SRX3010051, SRX3010052, SRX3010112, SRX3010113, SRX3010194, SRX3010195, SRX3834113, SRX5090127, SRX5090128, SRX707368, SRX707371, SRX9567089
ZNF92	TFs and others	Neural	SRX668219
MCM3	TFs and others	Neural	SRX9107918, SRX9107920, SRX9107922
CTCF	TFs and others	Neural	SRX067516, SRX080330, SRX080336, SRX080356, SRX080359, SRX080398, SRX080408, SRX099882, SRX099883, SRX100378, SRX103002, SRX10476638, SRX10976792, SRX10976793, SRX10976935, SRX10976936, SRX10976937, SRX10976938, SRX10977361, SRX10977362, SRX10977366, SRX10977367, SRX10977368, SRX10977522, SRX10977523, SRX10977524, SRX10977525, SRX11051033, SRX11051034, SRX11120917, SRX12129583, SRX12129584, SRX12…
H3K122ac	Histone	Neural	SRX5796290, SRX5796291, SRX5796292, SRX5796293, SRX5796294, SRX5796295, SRX5796296, SRX5796297, SRX5796298, SRX5796299, SRX5796300, SRX5796301, SRX5796302, SRX5796303, SRX5796304, SRX5796305, SRX5796306, SRX5796307, SRX5796308, SRX5796309, SRX5796310, SRX5796311, SRX5796312, SRX5796313, SRX5796314, SRX5796315, SRX5796316
BRCA1	TFs and others	Neural	SRX3798673, SRX3798674, SRX3798679, SRX3798680, SRX5025671, SRX5025672, SRX5025673, SRX5025674, SRX5025675, SRX5025676
ZBTB33	TFs and others	Neural	SRX190255, SRX8899553
SMCHD1	TFs and others	Neural	DRX002912, DRX002915, SRX2845372, SRX2845373
MAML3	TFs and others	Neural	SRX1035582, SRX1035583, SRX1035584, SRX1035585
H4K16ac	Histone	Neural	SRX3257624, SRX3257625, SRX3257626, SRX3257627, SRX3257628, SRX3257629, SRX3257630, SRX3257631, SRX3257632, SRX3257633, SRX3257634, SRX3257635, SRX3257636, SRX3257637, SRX3257638, SRX3257639, SRX3257640, SRX3257641, SRX3257642, SRX3257643, SRX3257644, SRX3257645, SRX3257646, SRX3257647, SRX3257648, SRX3257649, SRX3257650, SRX3257651, SRX3257652, SRX3257653, SRX3257654

## Sheet: Liver
Antigen	Antigen class	Cell type class	Accession ID
RAD51	TFs and others	Liver	SRX2423446, SRX2423447
CEBPG	TFs and others	Liver	SRX2636113, SRX2636114
TP53	TFs and others	Liver	SRX10478407, SRX10478408, SRX11453857, SRX11453860, SRX11453863, SRX838191, SRX838192
ARNTL	TFs and others	Liver	SRX10475531, SRX10475532, SRX10829247, SRX10829248, SRX10829249
NRL	TFs and others	Liver	SRX10476622, SRX10476623
HMG20A	TFs and others	Liver	SRX2630162, SRX2630163
CEBPB	TFs and others	Liver	SRX150572, SRX150701, SRX190234, SRX5077399, SRX5077402
PPARA	TFs and others	Liver	SRX16111528, SRX9022071, SRX9022073, SRX9022074, SRX9022075
TEAD1	TFs and others	Liver	SRX1011298, SRX2636000, SRX2636001, SRX731135
FOXA1	TFs and others	Liver	SRX100477, SRX100506, SRX10476475, SRX10476476, SRX159089, SRX159090, SRX159091, SRX159092, SRX159093, SRX159094, SRX2423687, SRX2423688, SRX2635877, SRX2635878, SRX2636234, SRX2636235, SRX8453150
TEAD4	TFs and others	Liver	SRX1011299, SRX10475595, SRX10475596, SRX190331
ATF7	TFs and others	Liver	SRX10476609, SRX10476610, SRX3322517, SRX3322518
NFYB	TFs and others	Liver	SRX10478078, SRX10478079
H3K9me3	Histone	Liver	SRX1013884, SRX16495609, SRX16495610, SRX16499700, SRX16499701, SRX16500248, SRX16500249, SRX186715, SRX2636265, SRX2636266, SRX2683669, SRX2683670, SRX2683671, SRX3010089, SRX3178416, SRX3178417, SRX3178418, SRX3178419, SRX3178420, SRX3178421, SRX3733785, SRX3733794, SRX4014825, SRX4014826, SRX4014835, SRX4014836, SRX4014847, SRX4014848, SRX4014867, SRX4014868, SRX4014883, SRX4014884, SRX4014896…
SP1	TFs and others	Liver	SRX100552, SRX10475529, SRX10475530, SRX12367792, SRX2423795, SRX2423796, SRX3230401, SRX5457221, SRX5457222, SRX5457498, SRX5457499
FOXK1	TFs and others	Liver	SRX10478449, SRX10478450, SRX3230383
ZNF865	TFs and others	Liver	SRX13008929, SRX13008930
ETV4	TFs and others	Liver	SRX2636219, SRX2636220, SRX4572974
ZHX2	TFs and others	Liver	SRX16498595, SRX16498597, SRX2635884, SRX2635885
SMAD4	TFs and others	Liver	SRX2636342, SRX2636343
NFIL3	TFs and others	Liver	SRX2630333, SRX2630334
FOXO1	TFs and others	Liver	SRX10475880, SRX10475881, SRX3230384
SIN3A	TFs and others	Liver	SRX100575
TRIB3	TFs and others	Liver	SRX10120401, SRX10120404, SRX10120408, SRX10120410, SRX10120412
RNA polymerase II	RNA polymerase	Liver	ERX1214186, SRX080147, SRX080148, SRX080149, SRX100413, SRX1013335, SRX1013336, SRX1013337, SRX1013338, SRX1013339, SRX1013340, SRX1013877, SRX1013886, SRX1013893, SRX1013900, SRX102983, SRX10827988, SRX10827989, SRX10827990, SRX10827991, SRX14647683, SRX14647684, SRX150392, SRX150622, SRX150682, SRX150707, SRX18847375, SRX18847376, SRX18847378, SRX190277, SRX2270124, SRX2270125, SRX2270126, SRX2…
NCOR1	TFs and others	Liver	SRX10475127, SRX10475128
HNF4G	TFs and others	Liver	SRX018627, SRX100449, SRX10475524, SRX10475525, SRX3322184, SRX3322185
ZFY	TFs and others	Liver	SRX10478216, SRX10478217
KMT2A	TFs and others	Liver	SRX10478647, SRX10478648
RFX1	TFs and others	Liver	SRX5457513, SRX5457514
CHD2	TFs and others	Liver	SRX150387
ZNF609	TFs and others	Liver	SRX10474998, SRX10474999
RBPJ	TFs and others	Liver	SRX5457215, SRX5457216
TEAD3	TFs and others	Liver	SRX2636153, SRX2636154
BHLHE40	TFs and others	Liver	SRX100528, SRX150645
ONECUT1	TFs and others	Liver	SRX10478326, SRX10478327
ZGPAT	TFs and others	Liver	SRX2636208, SRX2636209
ZBTB14	TFs and others	Liver	SRX10476736, SRX10476737
PITX1	TFs and others	Liver	SRX10478021, SRX10478022
ZNF460	TFs and others	Liver	SRX10475443, SRX10475444
ZNF317	TFs and others	Liver	SRX10475050, SRX10475051
NFE2L2	TFs and others	Liver	SRX2424059, SRX2424060
NFIA	TFs and others	Liver	SRX2630355, SRX2630356
H3K4me2	Histone	Liver	SRX038552, SRX038553, SRX067444, SRX13396860, SRX13396861, SRX2630348, SRX2630349, SRX7182560, SRX7182561
ZNF335	TFs and others	Liver	SRX10475279, SRX10475280, SRX3230417
KDM5B	TFs and others	Liver	SRX10475115, SRX10475116
AR	TFs and others	Liver	SRX8453143
ZNF362	TFs and others	Liver	SRX10475181, SRX10475182
H3K27ac	Histone	Liver	DRX313732, DRX313733, DRX313734, DRX313735, DRX313736, DRX313737, DRX313738, DRX313739, DRX431470, SRX038545, SRX038546, SRX067494, SRX1013327, SRX1013328, SRX1013878, SRX1013889, SRX10230766, SRX10230772, SRX10230778, SRX10230784, SRX10613566, SRX10613567, SRX1123867, SRX1123872, SRX11405192, SRX11405194, SRX11405196, SRX11405198, SRX11424553, SRX11424554, SRX11424559, SRX11424560, SRX11453856, …
ZNF281	TFs and others	Liver	SRX10474950, SRX10474951, SRX3230414
SMARCC1	TFs and others	Liver	SRX1123863, SRX1123868, SRX3511102
BRD4	TFs and others	Liver	SRX10478312, SRX10478313, SRX10613568, SRX10613569, SRX3322390, SRX3322391, SRX5077398, SRX5077401, SRX612504, SRX612505, SRX8468589, SRX8468590, SRX8468591, SRX8468592, SRX8468593
Epitope tags	TFs and others	Liver	SRX10046978, SRX10046984, SRX10120406, SRX1165090, SRX1165091, SRX1165095, SRX1165096, SRX1165100, SRX1165101, SRX1165102, SRX1165103, SRX1165104, SRX16687478, SRX16687484, SRX16687490, SRX16687496, SRX18057436, SRX18057438, SRX18057439, SRX18057441, SRX18057442, SRX19843154, SRX20741852, SRX20741853, SRX20741854, SRX20741855, SRX20741856, SRX20741857, SRX20741858, SRX20741859, SRX20741860, SRX20…
ELF1	TFs and others	Liver	SRX100460, SRX10476470, SRX10476471
ESR1	TFs and others	Liver	SRX9221932, SRX9221933, SRX9221935
FOXN3	TFs and others	Liver	SRX3881588, SRX3881589, SRX3881590, SRX3881591
ATF2	TFs and others	Liver	SRX10477190, SRX10477191, SRX3322122, SRX3322123
KDM5A	TFs and others	Liver	SRX10476598, SRX10476599
ATF4	TFs and others	Liver	SRX10120399, SRX10120402, SRX10976886, SRX10976887, SRX2636155, SRX2636156
HNRNPL	TFs and others	Liver	SRX3322252, SRX3322253, SRX4708023
RUVBL2	TFs and others	Liver	SRX2708824, SRX2708825, SRX2708826, SRX2708827, SRX3445806, SRX3445807, SRX9424506, SRX9424507
WDR5	TFs and others	Liver	SRX13178147, SRX13178148, SRX13178149, SRX13178153, SRX13178154, SRX13178155, SRX5416008
MAFK	TFs and others	Liver	SRX150385, SRX150689
H3K27me3	Histone	Liver	SRX038547, SRX038548, SRX067505, SRX1013885, SRX1013892, SRX1013899, SRX10230767, SRX10230773, SRX10230779, SRX10230785, SRX1023528, SRX118244, SRX118246, SRX14647687, SRX14647688, SRX15220805, SRX15220806, SRX16497015, SRX16497017, SRX16499750, SRX16499751, SRX16499759, SRX16499760, SRX190014, SRX2636133, SRX2636134, SRX2636135, SRX2683663, SRX2683664, SRX2683665, SRX3178422, SRX3178423, SRX3178…
THAP9	TFs and others	Liver	SRX10476494, SRX10476495
ZNF441	TFs and others	Liver	SRX10478620, SRX10478621
H3K4me3	Histone	Liver	ERX2868893, SRX038554, SRX038555, SRX067488, SRX1013326, SRX1013876, SRX1013880, SRX1013888, SRX1013895, SRX10230764, SRX10230770, SRX10230776, SRX10230782, SRX1123866, SRX1123871, SRX11424557, SRX11424558, SRX11424563, SRX11424564, SRX118243, SRX118245, SRX12367775, SRX12367780, SRX14647689, SRX14647690, SRX151398, SRX151399, SRX16308587, SRX16495757, SRX16495758, SRX16498501, SRX16498502, SRX16…
SMC1A	TFs and others	Liver	SRX1013333, SRX1013334, SRX1531774, SRX1531778
ARID3A	TFs and others	Liver	SRX150355
GFI1	TFs and others	Liver	SRX10475821, SRX10475822
SOX6	TFs and others	Liver	SRX10475369, SRX10475370, SRX3322510, SRX3322511
MAZ	TFs and others	Liver	SRX10474870, SRX10474871, SRX150415
E2F4	TFs and others	Liver	SRX10478016, SRX10478017
SPI1	TFs and others	Liver	SRX5574513, SRX5574514, SRX5574515, SRX5574516
ZNF770	TFs and others	Liver	SRX10476566, SRX10476567
PDS5B	TFs and others	Liver	SRX16687480, SRX16687486, SRX16687492, SRX16687498
H3K36me3	Histone	Liver	SRX038549, SRX038550, SRX067436, SRX1013882, SRX1013890, SRX1013897, SRX16498550, SRX16498551, SRX16499835, SRX16499836, SRX16500184, SRX16500185, SRX189994, SRX2420051, SRX2420054, SRX2630132, SRX2630133, SRX2683666, SRX2683667, SRX2683668, SRX2805650, SRX2805653, SRX2949684, SRX2949685, SRX2949686, SRX3010274, SRX3662738, SRX3662739, SRX3662742, SRX3662743, SRX3733784, SRX3733793, SRX4743492
RFX5	TFs and others	Liver	SRX150384
GFP	TFs and others	Liver	SRX1011293, SRX4743476, SRX4743477, SRX4743480, SRX4743481, SRX4743484, SRX4743485, SRX4743488, SRX4743489, SRX5654405, SRX5654406, SRX5654407, SRX5654408, SRX5654409, SRX5654410, SRX5654411, SRX5654412
H4K5ac	Histone	Liver	SRX2270119, SRX2270120, SRX2270121
ZNF646	TFs and others	Liver	SRX13007818, SRX13007819
NR2F1	TFs and others	Liver	SRX10476642, SRX10476643, SRX2636183, SRX2636184
PRDM15	TFs and others	Liver	SRX10474990, SRX10474991
GABPB1	TFs and others	Liver	SRX2635886, SRX2635887
HLF	TFs and others	Liver	SRX2636012, SRX2636013, SRX4572976
PATZ1	TFs and others	Liver	SRX10478588, SRX10478589, SRX4038241
ZNF384	TFs and others	Liver	SRX2423450, SRX2423451
THAP11	TFs and others	Liver	SRX2636019, SRX2636020
GATAD2A	TFs and others	Liver	SRX2636506, SRX2636507
YEATS2	TFs and others	Liver	SRX10478561, SRX10478562
LCORL	TFs and others	Liver	SRX10476672, SRX10476673, SRX3322835, SRX3322836
TFE3	TFs and others	Liver	SRX2636040, SRX2636041
ZNF143	TFs and others	Liver	SRX10475619, SRX10475620, SRX2423448, SRX2423449
TCF7L2	TFs and others	Liver	SRX094468, SRX10476677, SRX10476678
BCL6	TFs and others	Liver	SRX2636277, SRX2636278
EP300	TFs and others	Liver	SRX100544, SRX10475562, SRX10475563, SRX12367791, SRX150624, SRX16308590, SRX3733788, SRX3733797
ZNF710	TFs and others	Liver	SRX10478610, SRX10478611
USF2	TFs and others	Liver	SRX10476693, SRX10476694, SRX150725, SRX3230406
PAXIP1	TFs and others	Liver	SRX10476713, SRX10476714, SRX3230395
ZNF629	TFs and others	Liver	SRX10477244, SRX10477245
IRF2	TFs and others	Liver	SRX5457224, SRX5457225
MED1	TFs and others	Liver	SRX1013331, SRX1013332, SRX10478351, SRX10478352, SRX1531773, SRX1531777, SRX5471140
ZNF263	TFs and others	Liver	SRX10475859, SRX10475860
MYC	TFs and others	Liver	SRX080144, SRX080145, SRX080146, SRX102990, SRX12592702, SRX12592703, SRX13008953, SRX13008954
RBFOX2	TFs and others	Liver	SRX3323050, SRX3323051, SRX4708034
TCF12	TFs and others	Liver	SRX100381, SRX16500151, SRX16500152, SRX3230402, SRX3323086, SRX3323087, SRX6386952
THRB	TFs and others	Liver	SRX2635882, SRX2635883
H3K36ac	Histone	Liver	SRX2270110, SRX2270111, SRX2270112
PRDM10	TFs and others	Liver	SRX10475706, SRX10475707, SRX3230396
ZBTB40	TFs and others	Liver	SRX2424061, SRX2424062
HNRNPLL	TFs and others	Liver	SRX10977218, SRX10977219, SRX4708024
NFKB2	TFs and others	Liver	SRX10476795, SRX10476796
NFYA	TFs and others	Liver	SRX10476500, SRX10476501
FOXA2	TFs and others	Liver	DRX431469, SRX032874, SRX032875, SRX032876, SRX032877, SRX100448, SRX10475773, SRX10475774, SRX14280081, SRX14280082, SRX14280083, SRX14280084, SRX14280085, SRX14280086, SRX18156222, SRX18156223, SRX18156224, SRX2368886, SRX3230382, SRX3321879, SRX3321880, SRX3322233, SRX3322234, SRX3322258, SRX3322259
NFYC	TFs and others	Liver	SRX2636054, SRX2636055
ZFP91	TFs and others	Liver	SRX16500383, SRX16500384
NRF1	TFs and others	Liver	SRX150727, SRX2636389, SRX2636390
TCF25	TFs and others	Liver	SRX3230403
AHDC1	TFs and others	Liver	SRX10477201, SRX10477202
ZNF217	TFs and others	Liver	SRX10475476, SRX10475477
GMEB1	TFs and others	Liver	SRX10475441, SRX10475442
ATF1	TFs and others	Liver	SRX2630379, SRX2630380
HDAC1	TFs and others	Liver	SRX10475247, SRX10475248, SRX10477235, SRX10477236
HMGXB3	TFs and others	Liver	SRX10478446, SRX10478447, SRX3230386
STAT2	TFs and others	Liver	SRX19004913, SRX19004914, SRX19004915, SRX19004916, SRX19004917, SRX19004918, SRX19004919, SRX19004920, SRX19004921, SRX19004922, SRX19004923, SRX19004924, SRX22524736, SRX22524737, SRX22524738, SRX22524810, SRX22524811, SRX22524812, SRX22524813, SRX22524814, SRX22524815, SRX22524816, SRX22524817, SRX22524818, SRX22524819, SRX22524820, SRX22524821, SRX22524822
TFDP2	TFs and others	Liver	SRX10475559, SRX10475560
HIC2	TFs and others	Liver	SRX16495332, SRX16495333
SPEN	TFs and others	Liver	SRX10475480, SRX10475481
POGZ	TFs and others	Liver	SRX10476799, SRX10476800
KAT8	TFs and others	Liver	SRX2636562, SRX2636563
SOX5	TFs and others	Liver	SRX2636544, SRX2636545
RAD21	TFs and others	Liver	SRX100562, SRX10476639, SRX10476640, SRX1165087, SRX1165088, SRX1165089, SRX150726, SRX16687482, SRX16687488, SRX16687494, SRX16687500, SRX16687503, SRX16687506, SRX2630139, SRX2630140, SRX2630358, SRX2630359, SRX2636488, SRX2636489, SRX5457254, SRX5457255
HNF1A	TFs and others	Liver	SRX10478539, SRX10478540, SRX2636316, SRX2636317
YY1	TFs and others	Liver	SRX100426, SRX2635902, SRX2635903, SRX2636587, SRX2636588, SRX2708828, SRX2708829, SRX4708115, SRX4708116, SRX4708117, SRX4708118, SRX7359959
NONO	TFs and others	Liver	SRX3322556, SRX3322557, SRX3322762, SRX3322763, SRX4708041
ZNF652	TFs and others	Liver	SRX2635940, SRX2635941
MAFF	TFs and others	Liver	SRX150386, SRX4572975
STAG1	TFs and others	Liver	SRX10477193, SRX10477194
SOX13	TFs and others	Liver	SRX10475311, SRX10475312, SRX2635888, SRX2635889, SRX2636248, SRX2636249
ZNF12	TFs and others	Liver	SRX10475032, SRX10475033, SRX3230412
TFAP4	TFs and others	Liver	SRX10478379, SRX10478380, SRX2630195, SRX2630196
TBP	TFs and others	Liver	SRX10475553, SRX10475554, SRX150360
ZNF687	TFs and others	Liver	SRX10478565, SRX10478566
ZBTB38	TFs and others	Liver	SRX10976940, SRX10976941
VDR	TFs and others	Liver	SRX148892, SRX148894, SRX148897, SRX148898
ZNF48	TFs and others	Liver	SRX2635864, SRX2635865
HCFC1	TFs and others	Liver	SRX2424077, SRX2424078
CREM	TFs and others	Liver	SRX10475575, SRX10475576, SRX2636476, SRX2636477
HMGXB4	TFs and others	Liver	SRX10478425, SRX10478426, SRX5457318, SRX5457319
SIX4	TFs and others	Liver	SRX10475830, SRX10475831, SRX3230400
NR2F2	TFs and others	Liver	SRX190266, SRX2630286, SRX2630287, SRX2635806, SRX2635807
HOXA3	TFs and others	Liver	SRX10478483, SRX10478484
GATAD1	TFs and others	Liver	SRX2630210, SRX2630211
ETV5	TFs and others	Liver	SRX5457228, SRX5457229
AGO2	TFs and others	Liver	SRX4708039, SRX6783957, SRX6783958
SAP130	TFs and others	Liver	SRX2636538, SRX2636539
H3K9ac	Histone	Liver	SRX038556, SRX038557, SRX067389, SRX15220803, SRX15220804, SRX20671623, SRX20671624, SRX2270116, SRX2270117, SRX2270118, SRX2636392, SRX2636393, SRX3178404, SRX3178405, SRX3178406, SRX3178407, SRX3178408, SRX3178409, SRX5668343, SRX892618, SRX892619, SRX892620
ONECUT2	TFs and others	Liver	SRX10478594, SRX10478595
PDS5A	TFs and others	Liver	SRX16687479, SRX16687485, SRX16687491, SRX16687497
PHF8	TFs and others	Liver	SRX10475757, SRX10475758, SRX10478462, SRX10478463
USF1	TFs and others	Liver	SRX100572, SRX10475738, SRX10475739
HOMEZ	TFs and others	Liver	SRX2630206, SRX2630207
TBX3	TFs and others	Liver	SRX2424220, SRX2424221, SRX3322149, SRX3322150
FOSL1	TFs and others	Liver	SRX13008832, SRX13008833
SMC3	TFs and others	Liver	SRX150621, SRX17491553
NR5A1	TFs and others	Liver	SRX10475826, SRX10475827
DMAP1	TFs and others	Liver	SRX2636151, SRX2636152
ESRRA	TFs and others	Liver	SRX10475492, SRX10475493, SRX150700
ZNF574	TFs and others	Liver	SRX10476699, SRX10476700
PHF20	TFs and others	Liver	SRX10478496, SRX10478497
TBX2	TFs and others	Liver	SRX10475037, SRX10475038
PPARG	TFs and others	Liver	SRX2630234, SRX2630235
ZNF788	TFs and others	Liver	SRX10475149, SRX10475150
RBM22	TFs and others	Liver	SRX3322378, SRX3322379, SRX4708035
REST	TFs and others	Liver	SRX100389, SRX190240, SRX3323031, SRX3323032, SRX3323081, SRX3323082
FOXP1	TFs and others	Liver	SRX3230385, SRX3321911, SRX3321912, SRX5457476, SRX5457477
ATAC-Seq	ATAC-Seq	Liver	ERX3015860, ERX3015861, ERX3015862, SRX10049146, SRX10049147, SRX10230768, SRX10230774, SRX10230780, SRX10230786, SRX10336511, SRX10336512, SRX10475330, SRX10475331, SRX10475730, SRX10475731, SRX10475732, SRX10475733, SRX10475734, SRX10476602, SRX10476603, SRX10478233, SRX10478234, SRX10478485, SRX10478486, SRX10478520, SRX10478521, SRX10478627, SRX10478628, SRX10600369, SRX10600370, SRX10600371,…
ELF3	TFs and others	Liver	SRX2636285, SRX2636286
JUND	TFs and others	Liver	SRX100545, SRX150728, SRX2630318, SRX2630319, SRX2636352, SRX2636353
FOSL2	TFs and others	Liver	SRX100496, SRX10475315, SRX10475316
MTA1	TFs and others	Liver	SRX10478431, SRX10478432, SRX3230392
MAX	TFs and others	Liver	SRX10477208, SRX10477209, SRX150486, SRX190321, SRX2635979, SRX2635980, SRX2636601, SRX2636602
ATF3	TFs and others	Liver	SRX100548, SRX10474941, SRX10474942, SRX2630360, SRX2630361, SRX2635951, SRX2635952, SRX4572982
TAF1	TFs and others	Liver	SRX100412, SRX10477269, SRX10477270, SRX2630462, SRX2630463
KMT2B	TFs and others	Liver	SRX2630157, SRX2630158
MIER2	TFs and others	Liver	SRX2630220, SRX2630221
NR2F6	TFs and others	Liver	SRX2635990, SRX2635991, SRX2636363, SRX2636364
PROX1	TFs and others	Liver	SRX3230397
HNF4A	TFs and others	Liver	DRX431466, DRX431474, SRX018625, SRX018626, SRX100505, SRX10475577, SRX10475578, SRX10829250, SRX10829251, SRX10829252, SRX10829253, SRX10829254, SRX10829255, SRX150698, SRX2636008, SRX2636009, SRX2636083, SRX2636084
ZMYM3	TFs and others	Liver	SRX10476491, SRX10476492, SRX2636394, SRX2636395, SRX3230411
NR2C2	TFs and others	Liver	SRX028638, SRX028639, SRX10478063, SRX10478064, SRX150675
HNRNPK	TFs and others	Liver	SRX10976107, SRX10976108, SRX4708022
ZNF501	TFs and others	Liver	SRX10475121, SRX10475122
CEBPA	TFs and others	Liver	SRX2630241, SRX2630242, SRX4572983
SIX1	TFs and others	Liver	SRX10478072, SRX10478073
HNRNPC	TFs and others	Liver	SRX4708020
PBX2	TFs and others	Liver	SRX2636383, SRX2636384
KLF10	TFs and others	Liver	SRX3230391
IRF9	TFs and others	Liver	SRX16499972, SRX16499973, SRX19004925, SRX19004926, SRX19004927, SRX19004928, SRX19004929, SRX19004930, SRX19004931, SRX19004932, SRX19004933, SRX19004934, SRX19004935, SRX19004936, SRX19004937, SRX19004938, SRX19004939, SRX19004940, SRX19004941, SRX19004942, SRX19004943, SRX19004944, SRX22524802, SRX22524803, SRX22524804, SRX22524805, SRX22524806, SRX22524807, SRX22524808, SRX22524809
IRF1	TFs and others	Liver	SRX10476729, SRX10476730, SRX19004945, SRX19004946, SRX19004947, SRX19004948, SRX19004949, SRX19004950, SRX19004951, SRX19004952, SRX19004953, SRX19004954, SRX19004955, SRX19004956, SRX19004957, SRX19004958, SRX19004959, SRX19004960, SRX19004961, SRX19004962, SRX19004963, SRX19004964
JUN	TFs and others	Liver	SRX10475225, SRX10475226, SRX150444
KDM1A	TFs and others	Liver	SRX2630183, SRX2630184, SRX3321938, SRX3321939, SRX3321940
RXRB	TFs and others	Liver	SRX2636027, SRX2636028
ZNF219	TFs and others	Liver	SRX13006474, SRX13006475, SRX3230413
STAT1	TFs and others	Liver	SRX19004893, SRX19004894, SRX19004895, SRX19004896, SRX19004897, SRX19004898, SRX19004899, SRX19004900, SRX19004901, SRX19004902, SRX19004903, SRX19004904, SRX19004905, SRX19004906, SRX19004907, SRX19004908, SRX19004909, SRX19004910, SRX19004911, SRX19004912
TCF7	TFs and others	Liver	SRX2635892, SRX2635893
UBTF	TFs and others	Liver	SRX10478330, SRX10478331, SRX23177015, SRX23177016
CEBPD	TFs and others	Liver	SRX10476648, SRX10476649, SRX190233
MXI1	TFs and others	Liver	SRX150516
ZBTB26	TFs and others	Liver	SRX2630298, SRX2630299
THRA	TFs and others	Liver	SRX10477240, SRX10477241, SRX3230404
HDAC2	TFs and others	Liver	SRX100538, SRX10478224, SRX10478225, SRX2423815, SRX2423816
MXD1	TFs and others	Liver	SRX10476804, SRX10476805
GATA2	TFs and others	Liver	SRX10476776, SRX10476777
TFDP1	TFs and others	Liver	SRX5457182, SRX5457183
ZFX	TFs and others	Liver	SRX10475482, SRX10475483
ARID4A	TFs and others	Liver	SRX10478148, SRX10478149
RARA	TFs and others	Liver	SRX2635935, SRX2635936
SP2	TFs and others	Liver	SRX10478157, SRX10478158, SRX190243
RREB1	TFs and others	Liver	SRX10477999, SRX10478000, SRX3230398
ZBTB21	TFs and others	Liver	SRX10477205, SRX10477206, SRX3230407
EGR1	TFs and others	Liver	SRX10475147, SRX10475148, SRX5457320, SRX5457321, SRX5457410, SRX5457411
ZNF768	TFs and others	Liver	SRX10478009, SRX10478010
CREB1	TFs and others	Liver	SRX1165097, SRX1165098, SRX1165099, SRX190264, SRX2635790, SRX2635791, SRX5457248, SRX5457249
FOXP4	TFs and others	Liver	SRX10475196, SRX10475197
FOXJ3	TFs and others	Liver	SRX10475057, SRX10475058
RXRA	TFs and others	Liver	SRX100497, SRX10475073, SRX10475074, SRX5457233, SRX5457234, SRX5457467, SRX5457468
ZNF121	TFs and others	Liver	SRX10478127, SRX10478128
HNF1B	TFs and others	Liver	SRX10476574, SRX10476575, SRX4572977
ERF	TFs and others	Liver	SRX3230381, SRX5457305, SRX5457306
ARID5B	TFs and others	Liver	SRX10475138, SRX10475139, SRX3230377
ZNF331	TFs and others	Liver	SRX10478006, SRX10478007, SRX3230415
SKI	TFs and others	Liver	SRX5457340, SRX5457341
PHF21A	TFs and others	Liver	SRX10977166, SRX10977167
SMAD3	TFs and others	Liver	SRX10474945, SRX10474946, SRX148895, SRX148896
ASH2L	TFs and others	Liver	SRX5090148, SRX5090149, SRX5090150
XRCC5	TFs and others	Liver	SRX4708046, SRX6783935, SRX6783936
ZSCAN29	TFs and others	Liver	SRX10475194, SRX10475195, SRX3230419
ZNF24	TFs and others	Liver	SRX3322420, SRX3322421, SRX5457391, SRX5457392
YEATS4	TFs and others	Liver	SRX10475621, SRX10475622
ISL2	TFs and others	Liver	SRX10475796, SRX10475797
GABPA	TFs and others	Liver	SRX100388, SRX1165092, SRX1165093, SRX1165094, SRX2630137, SRX2630138, SRX2630405, SRX2630406, SRX2635825, SRX2635826
ZFP64	TFs and others	Liver	SRX2635914, SRX2635915
KDM2A	TFs and others	Liver	SRX10475261, SRX10475262, SRX3230389
NFIC	TFs and others	Liver	SRX190197, SRX3511104
MYBL2	TFs and others	Liver	SRX10478355, SRX10478356, SRX190332
RFX3	TFs and others	Liver	SRX23177031, SRX23177032, SRX2636179, SRX2636180
SRF	TFs and others	Liver	SRX100547, SRX16495623, SRX16495624
LCOR	TFs and others	Liver	SRX10475589, SRX10475590
HEY1	TFs and others	Liver	SRX100493
H3K4me1	Histone	Liver	SRX038551, SRX099898, SRX1013329, SRX1013330, SRX1123865, SRX1123870, SRX11424555, SRX11424556, SRX11424561, SRX11424562, SRX12367774, SRX12367779, SRX14255722, SRX14255725, SRX15220801, SRX15220802, SRX16308588, SRX16495642, SRX16495643, SRX16497094, SRX16497096, SRX16499692, SRX16499693, SRX2270113, SRX2270114, SRX2270115, SRX2636191, SRX2636192, SRX2869671, SRX2869674, SRX2869677, SRX3010055, …
LIN54	TFs and others	Liver	SRX10478402, SRX10478403
RBM25	TFs and others	Liver	SRX4708036, SRX4708107, SRX4708108, SRX4708109, SRX4708110
SP5	TFs and others	Liver	SRX2630470, SRX2630471
DRAP1	TFs and others	Liver	SRX2636291, SRX2636292
CTCF	TFs and others	Liver	DRX313740, DRX313741, DRX313742, DRX313743, DRX313744, DRX313745, DRX313746, DRX313747, SRX038543, SRX038544, SRX067396, SRX080142, SRX080143, SRX080346, SRX080378, SRX100531, SRX102986, SRX10478489, SRX10478490, SRX16495311, SRX16495312, SRX16499968, SRX16499969, SRX16499974, SRX16499975, SRX16687481, SRX16687487, SRX16687493, SRX16687499, SRX16687502, SRX16687505, SRX17491551, SRX3010015, SRX30…
ZNF7	TFs and others	Liver	SRX2636140, SRX2636141
PTEN	TFs and others	Liver	SRX5416007
ZNF777	TFs and others	Liver	SRX10475551, SRX10475552
MNT	TFs and others	Liver	SRX2423700, SRX2423701, SRX3322817, SRX3322818
ZBTB33	TFs and others	Liver	SRX100463, SRX100494, SRX10475166, SRX10475167, SRX2635821, SRX2635822, SRX2635955, SRX2635956
ZNF526	TFs and others	Liver	SRX10478492, SRX10478493
MNX1	TFs and others	Liver	SRX10475781, SRX10475782
ARID4B	TFs and others	Liver	SRX2636576, SRX2636577
FOXA3	TFs and others	Liver	SRX2630189, SRX2630190
LMNB1	TFs and others	Liver	SRX14280059, SRX14280060, SRX14280087, SRX14280088, SRX14280089, SRX14280090, SRX18156225, SRX18156226, SRX18156227, SRX4654319, SRX4654321
CBX5	TFs and others	Liver	SRX10476746, SRX10476747, SRX3230379

## Sheet: Kidney
Antigen	Antigen class	Cell type class	Accession ID
TP53	TFs and others	Kidney	SRX2940748, SRX2940749, SRX8699800, SRX8699801, SRX8699802, SRX8699803
ZNF426	TFs and others	Kidney	SRX3322035, SRX3322036
ZFP69B	TFs and others	Kidney	SRX2423857, SRX2423858
ZFP2	TFs and others	Kidney	SRX2424111, SRX2424112
PKNOX1	TFs and others	Kidney	SRX2423664, SRX2423665
SS18	TFs and others	Kidney	SRX10881848, SRX10881850
SS18L1	TFs and others	Kidney	SRX10881821, SRX10881824
TEAD1	TFs and others	Kidney	SRX20783272, SRX5718141, SRX5718142
FOXA1	TFs and others	Kidney	SRX2423471, SRX2423472, SRX5124850, SRX5124851, SRX5124852, SRX5124853
H3K9me3	Histone	Kidney	SRX10198036, SRX10198039, SRX10976102, SRX10976103, SRX11158280, SRX11158281, SRX11158282, SRX11158283, SRX11158284, SRX11158285, SRX11159968, SRX11159969, SRX11161871, SRX11161872, SRX11161873, SRX11161874, SRX11161875, SRX11161876, SRX11165912, SRX11165913, SRX1268853, SRX1268854, SRX1268855, SRX1268856, SRX14468122, SRX14468123, SRX14468124, SRX14468125, SRX14468126, SRX14468127, SRX14468128, …
NUTM1	TFs and others	Kidney	SRX20497471, SRX20497472, SRX20497475, SRX20497476, SRX6101039, SRX6101040, SRX6101041, SRX6101042
ZNF558	TFs and others	Kidney	SRX2423956, SRX2423957
RNA polymerase III	RNA polymerase	Kidney	SRX016996, SRX4574091, SRX4574092, SRX4574093, SRX4574094
ZNF555	TFs and others	Kidney	SRX3322988, SRX3322989
ZHX2	TFs and others	Kidney	SRX3636887, SRX3636888
SUZ12	TFs and others	Kidney	SRX2423442, SRX2423443, SRX4650913, SRX4650914, SRX4650915, SRX4650916, SRX4650917, SRX4650918, SRX4650933, SRX4650934, SRX4650935, SRX4650936, SRX4650937, SRX4650938, SRX4650953, SRX4650954, SRX4650955, SRX4650956, SRX4650957, SRX4650958, SRX4650971, SRX4650972, SRX4650973, SRX4650974, SRX4650975, SRX4650976, SRX9281789, SRX9281790, SRX9281791, SRX9281792, SRX9281793, SRX9281794, SRX9281795, SRX…
SMAD4	TFs and others	Kidney	SRX11033162, SRX11033163, SRX6957398, SRX6957399, SRX6957405, SRX6957408, SRX6957409, SRX6957410, SRX6957411, SRX6957485, SRX6957490
H3K14ac	Histone	Kidney	DRX366113, SRX15419265, SRX1782980, SRX1782981, SRX18828521, SRX18828522, SRX18828523, SRX18828524, SRX18828525, SRX18828526, SRX8566551, SRX8566552
RNA polymerase II	RNA polymerase	Kidney	DRX013186, DRX013189, DRX059631, DRX234813, DRX248905, DRX248907, DRX300419, DRX300420, SRX003882, SRX003883, SRX10528756, SRX10528757, SRX10528759, SRX10528760, SRX10528762, SRX10528763, SRX1092983, SRX1092984, SRX1092985, SRX1092989, SRX1092990, SRX1092991, SRX110666, SRX11196902, SRX11196907, SRX11196908, SRX11196913, SRX11196914, SRX11196915, SRX11196916, SRX11196923, SRX11196924, SRX1206063,…
NCOR1	TFs and others	Kidney	SRX118012, SRX118013, SRX6367575, SRX6367576, SRX6367577, SRX6367578, SRX6367590, SRX6367591, SRX6367592, SRX6367593
GLIS2	TFs and others	Kidney	SRX2424197, SRX2424198
ZNF10	TFs and others	Kidney	SRX3321919, SRX3321920
H2A.Z	Histone	Kidney	SRX8188421, SRX8188422
ZNF596	TFs and others	Kidney	SRX5457458, SRX5457459
KMT2A	TFs and others	Kidney	SRX2323866, SRX2323867, SRX2323890, SRX2323891, SRX2323894, SRX2323895, SRX4931232, SRX4931233, SRX4931236, SRX4931237, SRX4931240, SRX4931241, SRX4931244, SRX4931245, SRX4931247, SRX4931248, SRX4931250, SRX4931251, SRX4931253, SRX4931254, SRX4931267, SRX4931268, SRX4931269
TRIM28	TFs and others	Kidney	SRX065546, SRX065547, SRX10976388, SRX10976389, SRX150671, SRX16676305, SRX16676306, SRX17826856, SRX17826857, SRX17826858, SRX17826859, SRX17826860, SRX17826861, SRX22117740, SRX22117741, SRX22117742, SRX22117743
EHMT2	TFs and others	Kidney	SRX738354, SRX973412, SRX973413, SRX973414, SRX973415, SRX973420, SRX973421, SRX973422, SRX973423, SRX973428, SRX973429, SRX973432, SRX973433
ZBTB6	TFs and others	Kidney	SRX5457231, SRX5457232
KLF1	TFs and others	Kidney	SRX2424535, SRX2424536
NR3C1	TFs and others	Kidney	SRX316360, SRX316361, SRX316362, SRX316363, SRX316364, SRX4488114, SRX9628163, SRX9628164, SRX9628165, SRX9628166, SRX9628167, SRX9628168, SRX9628169, SRX9628170, SRX9628171, SRX9628172, SRX9628173, SRX9628174, SRX9628175, SRX9628176, SRX9628177, SRX9628178, SRX9799512, SRX9799513
RNF2	TFs and others	Kidney	SRX11078134, SRX11078135, SRX11078136, SRX113579, SRX113589, SRX12800898, SRX12800899, SRX12800900, SRX12800901, SRX18852838, SRX18852839, SRX18852840, SRX18852841, SRX4650905, SRX4650906, SRX4650907, SRX4650908, SRX4650909, SRX4650910, SRX4650911, SRX4650912, SRX4650927, SRX4650928, SRX4650929, SRX4650930, SRX4650931, SRX4650932, SRX4650947, SRX4650948, SRX4650949, SRX4650950, SRX4650951, SRX465…
PRDM4	TFs and others	Kidney	SRX7714742, SRX7714743
MEF2B	TFs and others	Kidney	SRX974290, SRX974291, SRX974292, SRX974293, SRX974294, SRX974295
RUNX1	TFs and others	Kidney	SRX2513054
H3K4me2	Histone	Kidney	SRX10606506, SRX10606507, SRX11196898, SRX11196899, SRX13085249, SRX13085250, SRX13085251, SRX13085252, SRX13085253, SRX13085254, SRX13085255, SRX13085256, SRX13085257, SRX13085258, SRX13085259, SRX13085260, SRX13085261, SRX13085262, SRX13085263, SRX13085264, SRX13085265, SRX13085266, SRX13085267, SRX13085268, SRX13085269, SRX13085270, SRX13085271, SRX13085272, SRX14466852, SRX14466857, SRX144675…
ZNF335	TFs and others	Kidney	SRX2423780, SRX2423781
SP3	TFs and others	Kidney	SRX2423529, SRX2423530
NELFA	TFs and others	Kidney	SRX3737118, SRX3737119
AR	TFs and others	Kidney	SRX433189, SRX433190, SRX433191, SRX433192, SRX433193, SRX433194
H3K27ac	Histone	Kidney	DRX013187, DRX337648, SRX10198037, SRX10198040, SRX10606520, SRX10606521, SRX10881826, SRX10881828, SRX1094509, SRX1094513, SRX1094517, SRX1094522, SRX10976114, SRX10976115, SRX11159624, SRX11159625, SRX11159626, SRX11159627, SRX11162218, SRX11162219, SRX11162220, SRX11162221, SRX11165404, SRX11165405, SRX11165406, SRX11165407, SRX11165408, SRX11165409, SRX11167120, SRX11167121, SRX11167122, SRX1…
RELA	TFs and others	Kidney	SRX1457745, SRX1457746, SRX1457747, SRX1457748, SRX14999351, SRX14999352, SRX14999353, SRX14999354, SRX14999355, SRX14999356, SRX18945295, SRX18945296, SRX18945297, SRX18945298, SRX18945299, SRX18945300, SRX18945301, SRX18945302, SRX18945312, SRX18945314, SRX18945316, SRX18945318, SRX18945320, SRX18945322, SRX18945324, SRX18945326, SRX2055843, SRX2255898, SRX2255899, SRX2255900, SRX2255901, SRX33…
SMARCC1	TFs and others	Kidney	SRX10881800, SRX10881858, SRX1123843, SRX1123848, SRX15419269, SRX5234496, SRX5234501, SRX5234505, SRX5234509, SRX5234513, SRX8566555
BRD4	TFs and others	Kidney	SRX1094508, SRX1094510, SRX1094512, SRX1094514, SRX1094516, SRX1094518, SRX1094520, SRX1094521, SRX13134685, SRX13134686, SRX13134702, SRX13134703, SRX13134713, SRX13134714, SRX13134723, SRX13134724, SRX170375, SRX342209, SRX342211, SRX367312, SRX367313, SRX5647962, SRX5647963, SRX5647964
ZNF382	TFs and others	Kidney	SRX2424521, SRX2424522
Epitope tags	TFs and others	Kidney	DRX021114, DRX021116, DRX231251, DRX231252, DRX231254, DRX231255, DRX231257, DRX231258, DRX366107, DRX411441, SRX065541, SRX065542, SRX065543, SRX065544, SRX065545, SRX10198035, SRX10198038, SRX1055105, SRX1055107, SRX1055109, SRX1055111, SRX11033158, SRX11033159, SRX113582, SRX12024485, SRX12024486, SRX12129648, SRX12129652, SRX12129656, SRX1299480, SRX1299481, SRX1299482, SRX1299483, SRX1308187…
ATF2	TFs and others	Kidney	SRX2423643, SRX2423644
WDR5	TFs and others	Kidney	SRX17537450, SRX17537451, SRX689366, SRX689368, SRX689370
ZNF18	TFs and others	Kidney	SRX2424676, SRX2424677
H3K27me3	Histone	Kidney	DRX013192, SRX11165396, SRX11165397, SRX11165398, SRX11165399, SRX11165400, SRX11165401, SRX113587, SRX1167107, SRX1167110, SRX1167113, SRX12035611, SRX12035614, SRX12813327, SRX12813340, SRX12813348, SRX12813356, SRX12813364, SRX14203263, SRX14466856, SRX14466867, SRX14468144, SRX14468145, SRX14468150, SRX14468151, SRX14468152, SRX14468153, SRX14468170, SRX14468171, SRX14468172, SRX14468173, SRX…
H3K4me3	Histone	Kidney	DRX013185, DRX059629, SRX10001390, SRX10001391, SRX10001392, SRX10001393, SRX10606492, SRX10606493, SRX10606516, SRX10606517, SRX10881834, SRX10881836, SRX11161959, SRX11161960, SRX11161961, SRX11161962, SRX11161963, SRX11161964, SRX11164181, SRX11164182, SRX11164183, SRX11164184, SRX11167716, SRX11167717, SRX11167718, SRX11167719, SRX11168406, SRX11168407, SRX11168408, SRX11168409, SRX11196900, …
ZNF781	TFs and others	Kidney	SRX2424449, SRX2424450
CBX7	TFs and others	Kidney	SRX5299351, SRX5299352, SRX5299353, SRX5299354, SRX5299355, SRX5299356
GLIS1	TFs and others	Kidney	SRX2423999, SRX2424000
MAZ	TFs and others	Kidney	SRX2423724, SRX2423725
SMARCC2	TFs and others	Kidney	SRX10881802, SRX10881804
SCRT2	TFs and others	Kidney	SRX2423805, SRX2423806
ZNF770	TFs and others	Kidney	SRX5457387, SRX5457388
H3K36me3	Histone	Kidney	DRX013188, SRX1037579, SRX1037580, SRX1037581, SRX1037585, SRX1037586, SRX1037587, SRX10976104, SRX10976105, SRX10976923, SRX10976924, SRX11158008, SRX11158009, SRX11159822, SRX11159823, SRX11159824, SRX11159825, SRX11159826, SRX11159827, SRX11160833, SRX11160834, SRX11160835, SRX11160836, SRX11168148, SRX11168149, SRX12813339, SRX12813347, SRX12813355, SRX12813363, SRX1441767, SRX1441768, SRX144…
ZXDB	TFs and others	Kidney	SRX2424129, SRX2424130
NCOA1	TFs and others	Kidney	SRX6367579, SRX6367580, SRX6367581, SRX6367582, SRX6367594, SRX6367595, SRX6367596, SRX6367597
ZFHX2	TFs and others	Kidney	SRX3322326, SRX3322327
KLF8	TFs and others	Kidney	SRX2424406, SRX2424407
GFP	TFs and others	Kidney	SRX12204156, SRX12204157, SRX12204158, SRX12204159, SRX12204160, SRX12204161, SRX12204162, SRX12204163, SRX12204164, SRX12204165, SRX1283467, SRX1514916, SRX1514917, SRX1514918, SRX1514919, SRX1514920, SRX1514921, SRX1514922, SRX1514923, SRX1514924, SRX1514925, SRX1514926, SRX1514927, SRX1514928, SRX1514929, SRX1514930, SRX1514931, SRX1514932, SRX1514933, SRX1514934, SRX1514935, SRX1514936, SRX15…
JMJD6	TFs and others	Kidney	SRX11944639, SRX11944640, SRX11944641, SRX11944642, SRX367310, SRX367311
H4K5ac	Histone	Kidney	SRX14466849, SRX14466860, SRX4415502, SRX4415503, SRX4415504, SRX4415505, SRX4415506, SRX4415507
FEZF1	TFs and others	Kidney	SRX2424507, SRX2424508
RBBP7	TFs and others	Kidney	SRX4415494, SRX4415495
ZNF34	TFs and others	Kidney	SRX3322783, SRX3322784
ZBTB17	TFs and others	Kidney	SRX2424241, SRX2424242
ZNF76	TFs and others	Kidney	SRX159134, SRX2423422, SRX2423423
BRCA2	TFs and others	Kidney	SRX6371943, SRX6371944
PATZ1	TFs and others	Kidney	SRX2424691, SRX2424692
ZNF697	TFs and others	Kidney	SRX3322152, SRX3322153
ZNF384	TFs and others	Kidney	SRX2424557, SRX2424558
CTNNB1	TFs and others	Kidney	SRX15288290, SRX15288296, SRX15288297, SRX15288298, SRX15288299, SRX15288300
ZNF711	TFs and others	Kidney	SRX7805362, SRX7805363
IKZF3	TFs and others	Kidney	SRX5457427, SRX5457428
THAP11	TFs and others	Kidney	SRX6927194, SRX6927195, SRX6927196, SRX6927197, SRX6927198, SRX6927199
AHR	TFs and others	Kidney	SRX15691669, SRX15691673, SRX15691677, SRX15691681, SRX15691683, SRX15691687, SRX15691691, SRX15691695, SRX15691701, SRX15691705, SRX15691714, SRX15691720, SRX15691724, SRX15691734, SRX15691738, SRX15691742, SRX15691749, SRX15691753
ARID1A	TFs and others	Kidney	SRX10881851, SRX10881852, SRX14999335, SRX14999336, SRX14999345, SRX14999346, SRX15419270, SRX8566556
PRDM1	TFs and others	Kidney	SRX2423461, SRX2423462
TCF7L2	TFs and others	Kidney	SRX094470
FOXL2	TFs and others	Kidney	SRX6957392, SRX6957393, SRX6957394, SRX6957395, SRX6957396, SRX6957397, SRX6957404, SRX6957432, SRX6957433, SRX6957434, SRX6957435, SRX6957460, SRX6957461, SRX6957462, SRX6957463, SRX6957464, SRX6957465, SRX6957466, SRX6957467, SRX6957484, SRX6957489
H4K20me3	Histone	Kidney	SRX7555968, SRX7556237, SRX7556238, SRX7556239, SRX7556240, SRX7556241, SRX7556242, SRX7556243, SRX8848992, SRX8848993, SRX8848994, SRX8848995, SRX8848996, SRX8848997, SRX8848998, SRX8849002
H3K56ac	Histone	Kidney	SRX7866172, SRX7866173, SRX7866174, SRX7866175
POLR3C	TFs and others	Kidney	SRX5803016, SRX5803017, SRX5803018, SRX5803019
ARNT	TFs and others	Kidney	SRX114494, SRX12129646, SRX12129651, SRX12129655, SRX15691668, SRX15691672, SRX15691676, SRX15691680, SRX15691682, SRX15691686, SRX15691690, SRX15691694, SRX15691700, SRX15691704, SRX15691719, SRX15691723, SRX15691733, SRX15691737, SRX15691741, SRX15691748, SRX15691752, SRX15691756, SRX2749136, SRX2749144, SRX2749155, SRX2993408, SRX3322950, SRX3322951, SRX4802303, SRX4802304, SRX4802310, SRX4802…
EP300	TFs and others	Kidney	SRX11033164, SRX11033165, SRX13994927, SRX14467509, SRX14467510, SRX1478537, SRX2055844, SRX2749139, SRX359404, SRX359405, SRX359406, SRX359407, SRX367321, SRX7299248, SRX7299250, SRX7299256, SRX7299258
ETS1	TFs and others	Kidney	SRX2055842
ZNF629	TFs and others	Kidney	SRX3322369, SRX3322370
H3K79me2	Histone	Kidney	DRX059633, SRX2263476, SRX2263479, SRX8188425
MED1	TFs and others	Kidney	SRX13134690, SRX13134691, SRX13134708, SRX13134709, SRX13134719, SRX13134720, SRX13134732, SRX13134733, SRX7884417, SRX7884419, SRX7884420, SRX7884422
ZNF263	TFs and others	Kidney	SRX150656
MYC	TFs and others	Kidney	SRX11582698, SRX11582701, SRX13134692, SRX13134693, SRX13134734, SRX13134735, SRX20465957, SRX20465964, SRX210718, SRX210719, SRX210720, SRX3422675, SRX3422676, SRX3422677, SRX3422687, SRX3422688, SRX3422689, SRX3587640, SRX3587641, SRX3587642, SRX3587643, SRX3587644, SRX3587645, SRX9857615, SRX9857616, SRX9857617, SRX9857618, SRX9857619
ZBTB8A	TFs and others	Kidney	SRX2423997, SRX2423998
KDM6A	TFs and others	Kidney	SRX10606502, SRX10606503
H4K12ac	Histone	Kidney	SRX4415496, SRX4415497, SRX4415498, SRX4415499, SRX4415500, SRX4415501, SRX6396382, SRX6396383, SRX6396384, SRX6396385
ZNF146	TFs and others	Kidney	SRX2424313, SRX2424314
TET2	TFs and others	Kidney	SRX10606512, SRX10606513, SRX10606514, SRX10606515, SRX130266, SRX1427029
ZNF600	TFs and others	Kidney	SRX2423406, SRX2423407
H3ac	Histone	Kidney	SRX367314
PRDM10	TFs and others	Kidney	SRX2423647, SRX2423648
ZNF518A	TFs and others	Kidney	SRX2423566, SRX2423567
ZNF585B	TFs and others	Kidney	SRX2424774, SRX2424775
NANOG	TFs and others	Kidney	SRX13365367, SRX13365368, SRX13441621, SRX13441622
KMT2D	TFs and others	Kidney	SRX4931234, SRX4931238, SRX4931242
ZNF654	TFs and others	Kidney	SRX2424037, SRX2424038
SOX17	TFs and others	Kidney	SRX15288301, SRX15288302, SRX15288303, SRX15288304, SRX15288305, SRX15288306
H3K18cr	Histone	Kidney	SRX12024489, SRX12024490
YAP1	TFs and others	Kidney	SRX5718139, SRX5718140
OSR2	TFs and others	Kidney	SRX2423790, SRX2423791
ZNF623	TFs and others	Kidney	SRX2423409, SRX2423410
ASXL1	TFs and others	Kidney	SRX367491
KAT6A	TFs and others	Kidney	DRX366108, DRX366109, DRX366110, DRX366111, DRX411442
PHF10	TFs and others	Kidney	SRX18828533, SRX18828534, SRX18828535, SRX18828536, SRX18828537, SRX18828538
ZBTB48	TFs and others	Kidney	SRX3323046, SRX3323047
RAD21	TFs and others	Kidney	DRX013191, SRX11120904, SRX15710541, SRX15710542, SRX15710543, SRX5718163, SRX5718164, SRX5718165, SRX5718166, SRX6916366, SRX6916368, SRX6916370
YY1	TFs and others	Kidney	SRX5457460, SRX5457461
ZSCAN4	TFs and others	Kidney	SRX3322119, SRX3322120
STAG1	TFs and others	Kidney	SRX15710544
SIX2	TFs and others	Kidney	SRX1318615, SRX1318617, SRX1478541, SRX1478542, SRX1478543, SRX1478544
ARID2	TFs and others	Kidney	SRX10881854, SRX10881856, SRX14999331, SRX14999332, SRX15419257, SRX15419258, SRX3102708, SRX3102709, SRX3102710, SRX8566543, SRX8566544
DPF2	TFs and others	Kidney	SRX5294338, SRX5294339, SRX5294340, SRX5294341, SRX5294342
ZNF398	TFs and others	Kidney	SRX3322508, SRX3322509
ZEB2	TFs and others	Kidney	SRX2424051, SRX2424052
ZNF692	TFs and others	Kidney	SRX2423916, SRX2423917
PIAS1	TFs and others	Kidney	SRX818634, SRX818635, SRX818636, SRX818637, SRX818643, SRX818644
EPAS1	TFs and others	Kidney	SRX114493, SRX12129645, SRX12129650, SRX12129654, SRX15691667, SRX15691671, SRX15691675, SRX15691679, SRX15691685, SRX15691689, SRX15691693, SRX15691697, SRX15691699, SRX15691703, SRX15691713, SRX15691722, SRX15691732, SRX15691736, SRX15691740, SRX15691747, SRX15691751, SRX15691755, SRX3051209, SRX3346350, SRX3346354, SRX4802301, SRX4802302, SRX4802308, SRX4802309, SRX4802315, SRX4802316, SRX4802…
YY2	TFs and others	Kidney	SRX3322572, SRX3322573
ZNF157	TFs and others	Kidney	SRX3322623, SRX3322624
GTF3C1	TFs and others	Kidney	SRX4636577, SRX4636578
H3K9ac	Histone	Kidney	SRX1293073, SRX15725653, SRX15725654, SRX15725655, SRX15725656, SRX20729518, SRX20729519, SRX20729520, SRX20729521, SRX2085876, SRX2085881, SRX2928212, SRX2928213, SRX2928216, SRX2928217, SRX2928220, SRX2928221, SRX2928224, SRX2928225, SRX2928228, SRX2928229, SRX2928232, SRX2928233, SRX2928236, SRX2928237, SRX2928240, SRX2928241, SRX3102723, SRX3102724, SRX3102725, SRX5864479, SRX5864480, SRX5864…
PHF8	TFs and others	Kidney	SRX20465958, SRX20465960, SRX20465962
VCP	TFs and others	Kidney	SRX9618642, SRX9618643, SRX9618644, SRX9618645
ZNF788	TFs and others	Kidney	SRX2424355, SRX2424356
ASPSCR1	TFs and others	Kidney	SRX9618636, SRX9618639
REST	TFs and others	Kidney	SRX2424590, SRX2424591, SRX9599287, SRX9599288, SRX9599293, SRX9599294, SRX9599295
ATAC-Seq	ATAC-Seq	Kidney	DRX231241, DRX231242, ERX3289100, ERX3289101, ERX3289102, ERX3289103, ERX3289104, ERX3289105, ERX3289106, ERX3289107, ERX3289108, ERX3289109, ERX3289110, ERX3289111, ERX9587610, ERX9587611, ERX9587612, ERX9587613, ERX9587614, ERX9587615, ERX9587616, ERX9587617, ERX9587618, ERX9587619, ERX9587620, ERX9587621, SRX10068561, SRX10068562, SRX10654952, SRX10654953, SRX10654961, SRX10665050, SRX10726462…
ZNF394	TFs and others	Kidney	SRX2423509, SRX2423510
TAF1	TFs and others	Kidney	SRX11196939, SRX11196940
KLF9	TFs and others	Kidney	SRX2423392, SRX2423393
SETDB1	TFs and others	Kidney	SRX10977220, SRX10977221
SMARCB1	TFs and others	Kidney	SRX10881846, SRX5234497, SRX5234502, SRX5234506, SRX5234510, SRX5234514
SMARCA4	TFs and others	Kidney	SRX10881817, SRX10881819, SRX1123844, SRX1123849, SRX11582704, SRX11582706, SRX14999333, SRX14999334, SRX15419259, SRX15419260, SRX18945303, SRX18945304, SRX18945305, SRX18945306, SRX18945307, SRX18945308, SRX18945309, SRX18945310, SRX18945311, SRX18945313, SRX18945315, SRX18945317, SRX18945319, SRX18945321, SRX18945323, SRX18945325, SRX4525853, SRX4525854, SRX4525855, SRX4525856, SRX5234495, SRX…
HIF1A	TFs and others	Kidney	SRX11007094, SRX11007095, SRX15691666, SRX15691670, SRX15691674, SRX15691678, SRX15691684, SRX15691688, SRX15691692, SRX15691696, SRX15691698, SRX15691702, SRX15691712, SRX15691721, SRX15691731, SRX15691735, SRX15691739, SRX15691746, SRX15691750, SRX15691754, SRX20663233, SRX20663235, SRX2993407, SRX3051208, SRX4802299, SRX4802300, SRX4802306, SRX4802307, SRX4802313, SRX4802314, SRX4802320, SRX48…
KLF10	TFs and others	Kidney	SRX5457124, SRX5457125
H3K9me2	Histone	Kidney	SRX17681800, SRX17681803, SRX973416, SRX973417, SRX973418, SRX973419, SRX973424, SRX973425, SRX973426, SRX973427, SRX973430, SRX973431, SRX973434, SRX973435
ZNF680	TFs and others	Kidney	SRX2423755, SRX2423756
KDM1A	TFs and others	Kidney	SRX3337441, SRX3337442, SRX3337443, SRX3337444, SRX3337445, SRX3337446, SRX3337447, SRX3337448
IKZF2	TFs and others	Kidney	SRX2424474, SRX2424475
MEAF6	TFs and others	Kidney	DRX234811, DRX300417
PBRM1	TFs and others	Kidney	SRX10881806, SRX10881808, SRX14999323, SRX14999324, SRX14999326, SRX15419250, SRX15419251, SRX15419276, SRX15419277, SRX15419280, SRX15419281, SRX15419284, SRX15419285, SRX15419288, SRX18945347, SRX8566539, SRX8566540, SRX8566562, SRX8566563, SRX8566566, SRX8566567, SRX8566570, SRX8566571, SRX8566574, SRX8566576, SRX8566578
SMAD2	TFs and others	Kidney	SRX6957406, SRX6957412, SRX6957413, SRX6957414, SRX6957415, SRX6957436, SRX6957437, SRX6957486, SRX6957491
ZBTB26	TFs and others	Kidney	SRX3322067, SRX3322068
ZNF189	TFs and others	Kidney	SRX5457309, SRX5457310
ZBTB20	TFs and others	Kidney	SRX3322534, SRX3322535
SUPT5H	TFs and others	Kidney	SRX12813324, SRX12813332, SRX12813337, SRX12813345, SRX12813353, SRX12813361, SRX6435383, SRX6435384, SRX6435386, SRX6435387, SRX6435390, SRX6435391, SRX6435392, SRX6435393, SRX6435396, SRX6435397, SRX6435398, SRX6435399, SRX6435401, SRX6435402, SRX6435404, SRX6435405, SRX6435407, SRX6435408, SRX6435410, SRX6435411
L3MBTL2	TFs and others	Kidney	SRX2424516, SRX2424517
KAT6B	TFs and others	Kidney	DRX411443, DRX411444
ZIC2	TFs and others	Kidney	SRX3322796, SRX3322797
ZNF341	TFs and others	Kidney	SRX2423578, SRX2423579
ZFX	TFs and others	Kidney	SRX3091916, SRX3091917, SRX3322014, SRX3322015, SRX7805360, SRX7805361, SRX7805370, SRX7805371, SRX7805372
SUMO2	TFs and others	Kidney	SRX316366, SRX316367, SRX316368, SRX316369, SRX6367571, SRX6367585, SRX6367586, SRX818632, SRX818633, SRX818641, SRX818642
ZNF449	TFs and others	Kidney	SRX5457326, SRX5457327
SP2	TFs and others	Kidney	SRX2424456, SRX2424457
ZBTB44	TFs and others	Kidney	SRX5457217, SRX5457218
H3	Histone	Kidney	SRX2737638, SRX2737639, SRX3304929, SRX3304930, SRX3304931, SRX3304932, SRX684266, SRX7099472, SRX7099473, SRX8030369, SRX8030370
ZBTB21	TFs and others	Kidney	SRX3322273, SRX3322274
PROSER1	TFs and others	Kidney	SRX10606496, SRX10606497, SRX10606498, SRX10606499, SRX10606500, SRX10606501
CREB1	TFs and others	Kidney	SRX5661982, SRX5661983, SRX5661984
BRD7	TFs and others	Kidney	SRX10881810, SRX10881812, SRX18945348, SRX18945349, SRX18945350, SRX18945351
Crotonyllysine	TFs and others	Kidney	SRX12024487, SRX12024488, SRX12306536, SRX12326828
WT1	TFs and others	Kidney	SRX2424670, SRX2424671
ZNF577	TFs and others	Kidney	SRX5457602, SRX5457603
HNF1B	TFs and others	Kidney	SRX9702274, SRX9702275, SRX9702276
ZNF513	TFs and others	Kidney	SRX5457122, SRX5457123
PRDM6	TFs and others	Kidney	SRX3323074, SRX3323075
H3K18ac	Histone	Kidney	SRX5718145, SRX5718146, SRX5718149, SRX5718150, SRX5718155, SRX5718156, SRX5718157, SRX5718158
ZNF438	TFs and others	Kidney	SRX2424131, SRX2424132
EGR2	TFs and others	Kidney	SRX2424611, SRX2424612
OGT	TFs and others	Kidney	SRX10606524, SRX10606525, SRX10606526, SRX10606527, SRX130268
SP7	TFs and others	Kidney	SRX2424159, SRX2424160
HIC1	TFs and others	Kidney	SRX2424472, SRX2424473
H3K4me1	Histone	Kidney	DRX013193, SRX10606504, SRX10606505, SRX10881830, SRX10881832, SRX10976093, SRX10976094, SRX11161893, SRX11161894, SRX11161895, SRX11161896, SRX11161897, SRX11161898, SRX11167700, SRX11167701, SRX11167702, SRX11167703, SRX11167704, SRX11167705, SRX11167857, SRX11167858, SRX11167859, SRX11167860, SRX11167861, SRX11167862, SRX11196896, SRX11196897, SRX1123846, SRX1123851, SRX1268859, SRX1268860, SR…
ZNF843	TFs and others	Kidney	SRX3322231, SRX3322232
EZH2	TFs and others	Kidney	SRX339949, SRX396276, SRX396278, SRX4599904, SRX4599905, SRX4599906, SRX4599907, SRX4599908, SRX4599909, SRX4599910, SRX4599911, SRX4599912, SRX4599913
ZSCAN20	TFs and others	Kidney	SRX2424393, SRX2424394
CTCF	TFs and others	Kidney	DRX013190, SRX080331, SRX080350, SRX080390, SRX080400, SRX10976697, SRX10976698, SRX10976878, SRX10976879, SRX10976991, SRX10976992, SRX10977203, SRX10977204, SRX10977205, SRX10977206, SRX1353402, SRX1353403, SRX15710538, SRX15939570, SRX15939571, SRX1594217, SRX1594218, SRX17765257, SRX17765258, SRX17765259, SRX188963, SRX199894, SRX199895, SRX2424204, SRX2424205, SRX3172940, SRX3172941, SRX4221…
BRD9	TFs and others	Kidney	SRX10881814, SRX10881816, SRX14999347, SRX14999348, SRX14999349, SRX14999350, SRX3927314, SRX3927315, SRX4525848, SRX4525849
ZBTB11	TFs and others	Kidney	SRX2424559, SRX2424560
ZNF366	TFs and others	Kidney	SRX2423456, SRX2423457
NCAPH2	TFs and others	Kidney	SRX2731517, SRX2731518, SRX2731519, SRX2731520, SRX4636575, SRX4636576

## Sheet: Lung
Antigen	Antigen class	Cell type class	Accession ID
FOS	TFs and others	Lung	SRX3321960, SRX3321961
TP53	TFs and others	Lung	DRX135461, DRX135462, SRX093319, SRX11163498, SRX11163499, SRX15203281, SRX15203282, SRX15203283, SRX15203284, SRX15203286, SRX15203287, SRX15203303, SRX15203304, SRX15203305, SRX15203306, SRX15203308, SRX15203309, SRX208484, SRX208485, SRX208486, SRX2940753, SRX2940754, SRX4230307, SRX5552344, SRX5552345, SRX5552346, SRX5552347, SRX5849924, SRX5849925, SRX5849926, SRX5849927, SRX620746, SRX62074…
RYBP	TFs and others	Lung	SRX16367657, SRX16367658, SRX16367659, SRX16367660, SRX16367661, SRX16367662
CEBPB	TFs and others	Lung	SRX11023673, SRX11023678, SRX11495270, SRX11495271, SRX11495272, SRX11495275, SRX11495276, SRX11495277, SRX150598, SRX150709, SRX190327, SRX2409744, SRX2409745, SRX2409746, SRX2409763, SRX2409764, SRX2409765, SRX2409852, SRX2409853, SRX2409924, SRX2409925, SRX2409941, SRX2409942, SRX2409943, SRX2409985, SRX2409986, SRX2409987, SRX2410150, SRX2410151, SRX2410158, SRX2410159, SRX2410160, SRX2410171…
H2AK119ub	Histone	Lung	SRX13435534, SRX13435535, SRX13435538, SRX16367664, SRX16367665, SRX16367666, SRX16367667, SRX16367668, SRX16367669, SRX16367670, SRX16367671, SRX16367672, SRX20509125, SRX20509127, SRX20509129, SRX20509131, SRX20509133, SRX20509135, SRX23055015, SRX2566759
TEAD1	TFs and others	Lung	SRX1004563, SRX731143, SRX9163074, SRX9163075
FOXA1	TFs and others	Lung	SRX15278054, SRX15278055, SRX15278056, SRX15278057, SRX174820, SRX190181, SRX190282, SRX7570768, SRX7570769, SRX8453148
TEAD4	TFs and others	Lung	SRX190324, SRX5887610, SRX5887613, SRX5887617, SRX5887620, SRX7695548, SRX7695549, SRX7695552, SRX7695553, SRX7695556, SRX7695557, SRX7695560, SRX7695561
INTS12	TFs and others	Lung	SRX1711343, SRX1711344
H3K9me3	Histone	Lung	DRX015217, DRX015226, DRX015235, DRX015244, DRX015253, DRX015262, DRX015271, DRX015280, DRX015289, DRX015298, DRX015307, DRX015316, DRX015325, DRX015334, DRX015343, DRX015352, DRX015361, DRX015379, DRX015388, DRX015397, DRX015406, DRX015415, DRX015424, DRX015433, DRX015442, DRX019518, SRX10187650, SRX10187651, SRX10187702, SRX10187703, SRX10346793, SRX10346794, SRX10346795, SRX10346796, SRX109762…
SP1	TFs and others	Lung	SRX190269
RNA polymerase III	RNA polymerase	Lung	SRX016555, SRX1330890, SRX1330891, SRX1330892, SRX1330893, SRX1330894, SRX1330895, SRX1330896, SRX1330897, SRX1330906, SRX1330907, SRX1330908, SRX150101, SRX150102, SRX301446, SRX301447, SRX301448
MGA	TFs and others	Lung	SRX3829961, SRX3829962, SRX5725259, SRX5725260, SRX5725261, SRX5725262
SIN3A	TFs and others	Lung	SRX190338, SRX2424049, SRX2424050
RNA polymerase II	RNA polymerase	Lung	DRX015216, DRX015225, DRX015234, DRX015243, DRX015252, DRX015261, DRX015270, DRX015279, DRX015288, DRX015297, DRX015306, DRX015315, DRX015324, DRX015333, DRX015342, DRX015351, DRX015360, DRX015378, DRX015387, DRX015396, DRX015405, DRX015414, DRX015423, DRX015432, DRX015441, DRX019519, SRX100405, SRX100406, SRX10131658, SRX10131659, SRX10131660, SRX10131661, SRX101770, SRX101771, SRX102987, SRX104…
H2A.Z	Histone	Lung	SRX186726, SRX186742, SRX186776, SRX205070, SRX205071, SRX2635972, SRX2635973, SRX2946120, SRX2946122, SRX3182096, SRX3182097, SRX3182098, SRX3182099, SRX9075364, SRX9075375
GRHL2	TFs and others	Lung	SRX268450, SRX268451, SRX268452
CHD2	TFs and others	Lung	SRX5457200, SRX5457201
H4	Histone	Lung	SRX1802447, SRX1802448, SRX1802449, SRX1802450, SRX3324899, SRX3324900, SRX3324901, SRX3324902, SRX3324903, SRX3324904, SRX3324905, SRX3324906, SRX502820, SRX502821, SRX502822, SRX502823, SRX502824, SRX502825
ZFP36	TFs and others	Lung	SRX5457412, SRX5457413
BHLHE40	TFs and others	Lung	SRX150519, SRX2424662, SRX2424663
NR3C1	TFs and others	Lung	SRX100402, SRX100403, SRX100404, SRX100416, SRX100418, SRX100440, SRX10976391, SRX10976392, SRX10976393, SRX10976920, SRX10976921, SRX10976922, SRX10977239, SRX10977240, SRX10977241, SRX10977356, SRX10977357, SRX10977358, SRX10977363, SRX10977364, SRX10977365, SRX10977371, SRX10977372, SRX10977373, SRX15278050, SRX15278051, SRX15278052, SRX15278053, SRX1650254, SRX1650255, SRX1650256, SRX1650398,…
RNF2	TFs and others	Lung	SRX13435536, SRX16005296, SRX16005297, SRX3010154, SRX3010155
NFE2L2	TFs and others	Lung	SRX1471688, SRX1471689, SRX1471690, SRX1471691, SRX2423601, SRX2423602, SRX2424163, SRX2424164, SRX3985128, SRX7268483, SRX7794485, SRX7794486
H3K4me2	Histone	Lung	SRX038674, SRX038675, SRX067532, SRX186692, SRX186707, SRX205084, SRX205085, SRX2409809, SRX2409810, SRX2409811, SRX2409921, SRX2409922, SRX2409923, SRX2409944, SRX2409945, SRX2409946, SRX2409953, SRX2409954, SRX2409955, SRX2409970, SRX2409971, SRX2410008, SRX2410009, SRX2410010, SRX2410017, SRX2410018, SRX2410071, SRX2410072, SRX2410073, SRX2410128, SRX2410129, SRX2410130, SRX2410173, SRX2410174…
ASXL2	TFs and others	Lung	SRX14203243
AR	TFs and others	Lung	SRX8453141, SRX9711149, SRX9711150, SRX9711151
JUNB	TFs and others	Lung	SRX2443756, SRX2443757, SRX2443758, SRX2443774, SRX2443775, SRX2443776, SRX2443777, SRX2443778, SRX2443802, SRX2443803, SRX2443807, SRX2443808, SRX2443812, SRX2443813, SRX2443824, SRX2443825, SRX2443826, SRX2443884, SRX2443885, SRX2443886, SRX2443893, SRX2443894, SRX2443895, SRX2443896, SRX2443897, SRX2443898, SRX2443900, SRX2443901, SRX2443902, SRX2443903, SRX8616839, SRX8616840, SRX8616841, SRX…
H3K27ac	Histone	Lung	DRX015223, DRX015232, DRX015241, DRX015250, DRX015259, DRX015268, DRX015277, DRX015286, DRX015295, DRX015304, DRX015313, DRX015322, DRX015331, DRX015340, DRX015349, DRX015358, DRX015367, DRX015385, DRX015394, DRX015403, DRX015412, DRX015421, DRX015430, DRX015439, DRX015448, DRX019512, ERX2869654, ERX2869658, ERX2869662, ERX2869666, SRX038666, SRX038667, SRX067397, SRX1004564, SRX10131674, SRX1013…
KLF5	TFs and others	Lung	SRX8037075, SRX8037076, SRX8037081, SRX9850737, SRX9850738, SRX9850739, SRX9850740
RELA	TFs and others	Lung	SRX1672129, SRX1672130, SRX1672133, SRX1672138, SRX1672139, SRX212182, SRX212183
BRD4	TFs and others	Lung	SRX10035152, SRX10035153, SRX10035154, SRX10035155, SRX10131670, SRX10131671, SRX10131682, SRX10131683, SRX12779926, SRX1360982, SRX1360983, SRX1360984, SRX1658067, SRX1658068, SRX1658069, SRX16739017, SRX16739018, SRX19551628, SRX19551629, SRX19551633, SRX19551634, SRX204900, SRX2267442, SRX2267443, SRX2267444, SRX2267445, SRX2267446, SRX2267447, SRX2267448, SRX2267449, SRX2267454, SRX2267455, S…
Epitope tags	TFs and others	Lung	SRX11245137, SRX11245140, SRX119637, SRX119638, SRX119639, SRX119640, SRX119641, SRX119642, SRX12779922, SRX12779923, SRX13343845, SRX13343847, SRX13343849, SRX1477647, SRX1477648, SRX1477649, SRX1477650, SRX1477651, SRX1477652, SRX1477653, SRX1477654, SRX1477655, SRX1477656, SRX1477657, SRX1477658, SRX1477660, SRX1477661, SRX1477662, SRX15683097, SRX15683099, SRX15683101, SRX19843158, SRX2150449…
ELF1	TFs and others	Lung	SRX190246, SRX6778343, SRX6778344
ESR1	TFs and others	Lung	SRX10468624, SRX10468625, SRX10468626, SRX10468627, SRX10468629, SRX10468630, SRX10468631
KDM5A	TFs and others	Lung	SRX3010238, SRX3010239
MAFK	TFs and others	Lung	SRX150483, SRX5457139, SRX5457140
H3K27me3	Histone	Lung	DRX015222, DRX015231, DRX015240, DRX015249, DRX015258, DRX015267, DRX015276, DRX015285, DRX015294, DRX015303, DRX015312, DRX015321, DRX015330, DRX015339, DRX015348, DRX015357, DRX015366, DRX015384, DRX015393, DRX015402, DRX015411, DRX015420, DRX015429, DRX015438, DRX015447, DRX019513, ERX2869655, ERX2869659, ERX2869663, ERX2869667, SRX038668, SRX038669, SRX067515, SRX10187621, SRX10187622, SRX101…
H3K4me3	Histone	Lung	DRX015219, DRX015228, DRX015237, DRX015246, DRX015255, DRX015264, DRX015273, DRX015282, DRX015291, DRX015300, DRX015309, DRX015318, DRX015327, DRX015336, DRX015345, DRX015354, DRX015363, DRX015381, DRX015390, DRX015399, DRX015408, DRX015417, DRX015426, DRX015435, DRX015444, DRX019516, ERX2869653, ERX2869657, ERX2869661, ERX2869665, SRX038676, SRX038677, SRX067474, SRX10001307, SRX10001309, SRX100…
UBR5	TFs and others	Lung	SRX17639414, SRX17639415, SRX17639416
SMC1A	TFs and others	Lung	SRX1531782, SRX1531786
MAZ	TFs and others	Lung	SRX186618, SRX2424249, SRX2424250
macroH2A1	Histone	Lung	SRX469058, SRX469060, SRX826360
ASXL3	TFs and others	Lung	SRX14203248, SRX14203249, SRX14203250, SRX7701200, SRX7701201
H3.3	Histone	Lung	SRX2630294, SRX2630295, SRX502804, SRX502806
H3K36me3	Histone	Lung	DRX015221, DRX015230, DRX015239, DRX015248, DRX015257, DRX015266, DRX015275, DRX015284, DRX015293, DRX015302, DRX015311, DRX015320, DRX015329, DRX015338, DRX015347, DRX015356, DRX015365, DRX015383, DRX015392, DRX015401, DRX015410, DRX015419, DRX015428, DRX015437, DRX015446, DRX019514, SRX038670, SRX038671, SRX067450, SRX10187643, SRX10187644, SRX10187697, SRX10187698, SRX10187752, SRX10187753, SR…
HMGB2	TFs and others	Lung	SRX1993515, SRX1993516, SRX2765967, SRX2765968
C11orf53	TFs and others	Lung	SRX12779918, SRX12779919, SRX12779934, SRX12779935, SRX12779943, SRX12779944, SRX14286720, SRX14286721, SRX16347846
GATA3	TFs and others	Lung	SRX190183
RFX5	TFs and others	Lung	SRX186620, SRX3322236, SRX3322237
BRD2	TFs and others	Lung	SRX16739013, SRX16739014, SRX3236727, SRX3236738, SRX4001478, SRX4001479, SRX4001482, SRX4001483, SRX8823216
GFP	TFs and others	Lung	SRX12567758, SRX12567762, SRX12567763
H4K5ac	Histone	Lung	SRX3236718, SRX3236729, SRX3324943, SRX3324944, SRX3324945, SRX3324946
ASCL1	TFs and others	Lung	SRX1044120, SRX1044121, SRX1044122, SRX11245136, SRX11245139, SRX13435532, SRX13435533
TP63	TFs and others	Lung	SRX13009224, SRX13009225, SRX18031710, SRX18031711, SRX277138, SRX6852815
BCL3	TFs and others	Lung	SRX190231, SRX2409756, SRX2409757, SRX2409761, SRX2409762, SRX2409799, SRX2409800, SRX2409801, SRX2409812, SRX2409813, SRX2409814, SRX2409873, SRX2409874, SRX2409875, SRX2409897, SRX2409898, SRX2410005, SRX2410006, SRX2410007, SRX2410035, SRX2410036, SRX2410037, SRX2410074, SRX2410075, SRX2410076, SRX2410155, SRX2410156, SRX2410157, SRX2410168, SRX2410169, SRX2410170, SRX2410218, SRX2410219
PRDM1	TFs and others	Lung	SRX10478404, SRX10478405
RB1	TFs and others	Lung	SRX016028, SRX016029, SRX016030, SRX016032, SRX016033, SRX016035, SRX016037, SRX099404, SRX659751, SRX659752, SRX659758, SRX659759, SRX659760, SRX659761
ZNF624	TFs and others	Lung	SRX10475151, SRX10475152
SUMO1	TFs and others	Lung	SRX204162, SRX204163, SRX204171, SRX204172
H4K20me3	Histone	Lung	SRX1802443, SRX1802444, SRX1802445, SRX1802446, SRX6384108, SRX649287, SRX649288, SRX649289, SRX649290, SRX7555967, SRX7556208, SRX7556209, SRX7556211, SRX7556212, SRX7556213, SRX7556214, SRX7556245, SRX8849000, SRX8849001, SRX8849032, SRX8849033, SRX8849035, SRX8849036, SRX8849037, SRX8849038
SREBF1	TFs and others	Lung	SRX2424594, SRX2424595
ARNT	TFs and others	Lung	SRX4672369, SRX4672370, SRX4672371
EP300	TFs and others	Lung	SRX10976213, SRX10976214, SRX10976215, SRX10976244, SRX10976245, SRX10976246, SRX10976540, SRX10976541, SRX10976624, SRX10976625, SRX10976626, SRX10977142, SRX10977143, SRX10977144, SRX10977459, SRX10977460, SRX12779936, SRX147007, SRX190283, SRX212184, SRX212185, SRX2409758, SRX2409759, SRX2409760, SRX2409818, SRX2409819, SRX2409820, SRX2409846, SRX2409847, SRX2409848, SRX2409905, SRX2409906, SR…
USF2	TFs and others	Lung	SRX3322384, SRX3322385, SRX3322620, SRX3322621
PAXIP1	TFs and others	Lung	SRX18884277, SRX18884278, SRX18884279, SRX18884280, SRX18884281, SRX18884282, SRX18884283, SRX18884284
ETS1	TFs and others	Lung	SRX190285
H3K79me2	Histone	Lung	SRX186708, SRX186739, SRX186745, SRX2636225, SRX2636226, SRX9075361, SRX9075372
PBX1	TFs and others	Lung	SRX10478544, SRX10478545
MED1	TFs and others	Lung	SRX12779933, SRX129089, SRX1531781, SRX1531785, SRX19551627, SRX19551631, SRX19551632, SRX5471141
ZC3H11A	TFs and others	Lung	SRX3322168, SRX3322169
MYC	TFs and others	Lung	SRX129106, SRX129110, SRX181189, SRX181190, SRX1813596, SRX1813597, SRX1813598, SRX1813599, SRX1813600, SRX1813601, SRX186612, SRX189239, SRX189240, SRX3873725, SRX3873726, SRX5725258
TCF12	TFs and others	Lung	SRX190202
H2A.XS139ph	Histone	Lung	SRX13362932, SRX13362936, SRX1595739, SRX1595740, SRX1595741, SRX1595751, SRX1595752
FOXF2	TFs and others	Lung	SRX10475386, SRX10475387
CRTC2	TFs and others	Lung	SRX5576990, SRX5576993
AFF1	TFs and others	Lung	SRX3873706, SRX3873707, SRX3873708, SRX3873709, SRX9763742
FOXA2	TFs and others	Lung	SRX190180, SRX2368896, SRX2368897, SRX7570770, SRX7570771
NFIB	TFs and others	Lung	SRX13439326, SRX13439329, SRX13439332
YAP1	TFs and others	Lung	SRX1004562, SRX1038944, SRX1038945, SRX18031708, SRX18031709, SRX5887611, SRX5887614, SRX5887618, SRX5887621, SRX731141, SRX731142, SRX757325, SRX757326, SRX8400470, SRX8400471
HDAC1	TFs and others	Lung	SRX11399797, SRX11399798, SRX11399799, SRX9779519
NELFCD	TFs and others	Lung	SRX10131664, SRX10131665
RAD21	TFs and others	Lung	SRX11312423, SRX11312424, SRX11312439, SRX11312440, SRX150380, SRX150703, SRX18884286, SRX18884287, SRX18884288, SRX18884289, SRX18884290, SRX18884291, SRX18884292, SRX18884293, SRX190217, SRX3981831, SRX3981832, SRX3981833, SRX3981837, SRX3981838, SRX3981839, SRX3981840, SRX3981841, SRX3981842, SRX3981849, SRX3981850, SRX3981851, SRX3981861, SRX3981862, SRX3981863, SRX3981864, SRX3981865, SRX398…
YY1	TFs and others	Lung	SRX190250
CREBBP	TFs and others	Lung	SRX3324957, SRX3324958, SRX3324959, SRX3324960
NKX2-1	TFs and others	Lung	SRX12008006, SRX12008007, SRX12008008, SRX12008009, SRX12008010, SRX12008011, SRX12008014, SRX12008015, SRX12008016, SRX12008017, SRX12008018, SRX12008019, SRX12008020, SRX174813, SRX174815, SRX174817, SRX174819, SRX2164786, SRX2164788, SRX366169, SRX366170
SREBF2	TFs and others	Lung	SRX2424237, SRX2424238
BRD8	TFs and others	Lung	SRX9206313, SRX9206314
RBL2	TFs and others	Lung	SRX016031, SRX016034, SRX016036, SRX016038, SRX099406
CUL4A	TFs and others	Lung	SRX8829864, SRX8829866, SRX8829868, SRX8829871
TBP	TFs and others	Lung	SRX4367421, SRX4367422, SRX4367431, SRX4367432, SRX4367441, SRX4367442
HES2	TFs and others	Lung	SRX2409879, SRX2409880, SRX2409881, SRX2409902, SRX2409903, SRX2409904, SRX2409913, SRX2409914, SRX2409979, SRX2409980, SRX2409981, SRX2410014, SRX2410015, SRX2410016, SRX2410050, SRX2410051, SRX2410052, SRX2410053, SRX2410054, SRX2410062, SRX2410063, SRX2410064, SRX2410105, SRX2410106, SRX2410255, SRX2410256, SRX2410257, SRX2410290, SRX2410291, SRX2410295, SRX2410296, SRX2410297
NEUROD1	TFs and others	Lung	SRX1044124, SRX1044125, SRX11245134, SRX11245135, SRX16739009, SRX16739010, SRX17119601, SRX17119604
ELL2	TFs and others	Lung	SRX3873714, SRX3873715, SRX3873716, SRX3873717
SOX2	TFs and others	Lung	ERX2260038, ERX2260040, ERX2260044, ERX2260046, SRX11904439, SRX11904440, SRX11904441, SRX11904442, SRX11904443, SRX11904444, SRX1813580, SRX1813581, SRX1813582, SRX1813583, SRX1813584, SRX1813585, SRX2731713, SRX2732210, SRX2732211, SRX277137, SRX6852808, SRX6852809, SRX6852810, SRX6852811, SRX6852812, SRX6852813, SRX6852814
H3K9ac	Histone	Lung	SRX038678, SRX038679, SRX067403, SRX099402, SRX099403, SRX10131676, SRX10131677, SRX12798233, SRX12798234, SRX12798235, SRX12798236, SRX12798237, SRX12798238, SRX12798239, SRX12798240, SRX12798241, SRX15574563, SRX15574564, SRX15574565, SRX15574566, SRX15574567, SRX15574568, SRX15574569, SRX15574570, SRX15574571, SRX15574572, SRX15574573, SRX1756887, SRX1756895, SRX1756903, SRX1756911, SRX1756919…
PHF8	TFs and others	Lung	SRX3010070, SRX3010071
USF1	TFs and others	Lung	SRX100474, SRX100502, SRX190284
VCP	TFs and others	Lung	SRX9616656, SRX9635843, SRX9635844, SRX9635845
BAP1	TFs and others	Lung	SRX13435530, SRX13435531, SRX13435537, SRX14203241, SRX14203245, SRX14203246, SRX14203247, SRX14203254, SRX8333285, SRX8333286
FOSL1	TFs and others	Lung	SRX8616810, SRX8616811, SRX8616812, SRX8616813, SRX8616814, SRX8616815, SRX8616816, SRX8616817, SRX8616818, SRX8616819, SRX8616820, SRX8616821, SRX8616822, SRX8616823
SMC3	TFs and others	Lung	SRX11312425, SRX11312426, SRX2423986, SRX2423987, SRX2424749, SRX2424750, SRX3981828, SRX3981829, SRX3981830, SRX3981834, SRX3981835, SRX3981836, SRX3981843, SRX3981844, SRX3981845, SRX3981846, SRX3981847, SRX3981848, SRX3981852, SRX3981853, SRX3981854, SRX3981855, SRX3981856, SRX3981857, SRX3981858, SRX3981859, SRX3981860, SRX3981870, SRX3981871, SRX3981872, SRX3981873, SRX3981874, SRX3981875, S…
POU2F3	TFs and others	Lung	SRX12779920, SRX12779921, SRX12779937, SRX12779938, SRX12779940, SRX12779945, SRX12779946, SRX14286731, SRX16347847, SRX4143035
PAX9	TFs and others	Lung	SRX9779494, SRX9779515
GATA4	TFs and others	Lung	SRX1989717
ASPSCR1	TFs and others	Lung	SRX13171714, SRX17321269, SRX17321270, SRX17321271, SRX17321272, SRX17321273, SRX17321274, SRX17321275, SRX17321276, SRX17321277, SRX9616652, SRX9616654, SRX9618648, SRX9618649, SRX9618650
REST	TFs and others	Lung	SRX190205, SRX3010230, SRX3010231
ATAC-Seq	ATAC-Seq	Lung	DRX127553, DRX127554, DRX127555, DRX127556, DRX127557, DRX127558, DRX127559, DRX127560, DRX127561, DRX127562, DRX127563, DRX127564, DRX127565, DRX127566, DRX127567, DRX127568, DRX127569, DRX127570, DRX127571, DRX127572, DRX127573, DRX127574, DRX127575, DRX127576, DRX127577, DRX127578, DRX127579, DRX127580, DRX127581, DRX127582, DRX127583, DRX127584, DRX127585, DRX127586, DRX127587, DRX127588, DRX…
JUND	TFs and others	Lung	SRX190179, SRX2010844, SRX2010845, SRX8616854, SRX8616855, SRX8616856, SRX8616857, SRX8616858, SRX8616859, SRX8616860, SRX8616861, SRX8616862, SRX8616863, SRX8616864, SRX8616865, SRX9654433
FOSL2	TFs and others	Lung	SRX10475404, SRX10475405, SRX190204, SRX2409787, SRX2409788, SRX2409789, SRX2409821, SRX2409822, SRX2409823, SRX2409828, SRX2409829, SRX2409911, SRX2409912, SRX2409959, SRX2409960, SRX2409961, SRX2410000, SRX2410001, SRX2410002, SRX2410095, SRX2410096, SRX2410097, SRX2410107, SRX2410108, SRX2410112, SRX2410113, SRX2410114, SRX2410176, SRX2410177, SRX2410178, SRX2410205, SRX2410206, SRX2410207, SR…
MAX	TFs and others	Lung	SRX129107, SRX129111, SRX150378, SRX189237, SRX189238, SRX190184
ATF3	TFs and others	Lung	SRX190245
TAF1	TFs and others	Lung	SRX190268
FOSB	TFs and others	Lung	SRX10477247, SRX10477248
NR5A2	TFs and others	Lung	SRX10478059, SRX10478060
HOXA7	TFs and others	Lung	SRX10474926, SRX10474927
SMARCA4	TFs and others	Lung	SRX22451043, SRX22451044, SRX22451045, SRX3542504, SRX3548667, SRX3548668, SRX5982340, SRX5982341, SRX5982342, SRX5982343, SRX5982364, SRX7951324, SRX7951325, SRX7951327, SRX7951328, SRX7951330, SRX7951331, SRX8827510, SRX8827511, SRX8827512, SRX8827513, SRX8827514, SRX8827515, SRX8827539, SRX8827540, SRX8827541, SRX8827542
HIF1A	TFs and others	Lung	SRX14746753, SRX14746754, SRX1528430, SRX7712492, SRX7712493, SRX7712494, SRX7712495, SRX7712496, SRX7712497, SRX7712498, SRX7712499, SRX7794487, SRX7794488
H3K9K14ac	Histone	Lung	DRX015218, DRX015227, DRX015236, DRX015245, DRX015254, DRX015263, DRX015272, DRX015281, DRX015290, DRX015299, DRX015308, DRX015317, DRX015326, DRX015335, DRX015344, DRX015353, DRX015362, DRX015380, DRX015389, DRX015398, DRX015407, DRX015416, DRX015425, DRX015434, DRX015443, DRX019517, SRX180893, SRX180894
EHF	TFs and others	Lung	SRX10477237, SRX10477238, SRX2010836, SRX2010837, SRX761562, SRX761563
H3K9me2	Histone	Lung	SRX2547033, SRX2547034, SRX2636016, SRX2636017, SRX2652423, SRX2652424, SRX3517808, SRX3517809, SRX3517818, SRX3517819, SRX497249, SRX497250
IRF1	TFs and others	Lung	SRX12694130, SRX12694132, SRX12694134, SRX12694136, SRX12694138, SRX12694140, SRX12694142, SRX12694143, SRX12694145, SRX12694147, SRX12694148, SRX12694150
JUN	TFs and others	Lung	SRX10976151, SRX10976152, SRX10976153, SRX10976237, SRX10976238, SRX10976239, SRX10976447, SRX10976448, SRX10976449, SRX10976451, SRX10976452, SRX10976453, SRX10976694, SRX10976695, SRX10976696, SRX10976727, SRX10976728, SRX10976729, SRX14096294, SRX14096295, SRX14096298, SRX14096299, SRX14096302, SRX14096303, SRX14096306, SRX14096307, SRX14096310, SRX14096311, SRX2010842, SRX2010843, SRX2424722,…
KDM1A	TFs and others	Lung	SRX3010106, SRX3010107, SRX3517811, SRX3517821, SRX890395, SRX890396
MXI1	TFs and others	Lung	SRX186619
PBX3	TFs and others	Lung	SRX190211
BrdU	TFs and others	Lung	SRX13343854, SRX13343855
SIX5	TFs and others	Lung	SRX190335
HDAC2	TFs and others	Lung	SRX11399800, SRX11399801, SRX11399802, SRX3010110, SRX3010111, SRX9779520
SMARCA2	TFs and others	Lung	SRX5982359, SRX5982360, SRX5982361, SRX5982362, SRX5982363, SRX7951322, SRX7951323, SRX8119674
DDX11	TFs and others	Lung	SRX1772378, SRX1772379, SRX1772381, SRX1772382
NME2	TFs and others	Lung	SRX181191, SRX181192
H4K5K8ac	Histone	Lung	SRX3236717, SRX3236728, SRX4001480, SRX4001481, SRX4001484, SRX4001485
H3	Histone	Lung	SRX130252, SRX130256, SRX1595748, SRX1595749, SRX1595750, SRX205104, SRX205105, SRX275792, SRX275793, SRX275798, SRX275799, SRX3182100, SRX3182101, SRX3324891, SRX3324892, SRX3324893, SRX3324894, SRX3324895, SRX3324896, SRX3324897, SRX3324898, SRX3324947, SRX3324948, SRX3517803, SRX3517813, SRX3517823, SRX3517829, SRX4230300, SRX620734, SRX620735, SRX9075365, SRX9075366, SRX9075367, SRX9075376, S…
E2F6	TFs and others	Lung	SRX190222
CDK9	TFs and others	Lung	SRX10131662, SRX10131663
CREB1	TFs and others	Lung	SRX190175, SRX190176, SRX190182, SRX5576989, SRX5576992
HIRA	TFs and others	Lung	SRX502808, SRX502810, SRX502812, SRX502814
H3K27me	Histone	Lung	DRX284589, DRX284590, DRX284591, DRX284592, DRX284593, DRX284594
H3K18ac	Histone	Lung	SRX099400, SRX099401, SRX10131672, SRX10131673, SRX212683, SRX2781291, SRX2781300, SRX2781309, SRX2781320, SRX3288989, SRX3288990, SRX3288991, SRX3288992, SRX3288993, SRX3324927, SRX3324928, SRX3324929, SRX3324930, SRX3596430, SRX3596433, SRX3596436, SRX3596439, SRX4367415, SRX4367416, SRX4367425, SRX4367426, SRX4367435, SRX4367436
SMAD3	TFs and others	Lung	SRX13293444, SRX366167, SRX366168, SRX366175
HMGB1	TFs and others	Lung	SRX10567327, SRX10567329, SRX10567331, SRX10567333, SRX3585704
GABPA	TFs and others	Lung	SRX190289
BACH1	TFs and others	Lung	SRX9969715, SRX9969716
H3K4me1	Histone	Lung	DRX015220, DRX015229, DRX015238, DRX015247, DRX015256, DRX015265, DRX015274, DRX015283, DRX015292, DRX015301, DRX015310, DRX015319, DRX015328, DRX015337, DRX015346, DRX015355, DRX015364, DRX015382, DRX015391, DRX015400, DRX015409, DRX015418, DRX015427, DRX015436, DRX015445, DRX019515, SRX038672, SRX038673, SRX067400, SRX10187647, SRX10187648, SRX10187805, SRX10187806, SRX10976505, SRX10976506, SR…
EZH2	TFs and others	Lung	SRX15312374, SRX15312375, SRX186725, SRX20765205, SRX20765208, SRX20765217, SRX20765220, SRX20765221, SRX22451040, SRX22451041, SRX22451042, SRX22451048, SRX22451049, SRX3148638, SRX3148643, SRX3148648, SRX3148653, SRX5090164, SRX5090165, SRX5090175, SRX5090176, SRX7451120, SRX7451121, SRX8827516, SRX8827517, SRX8827518, SRX8827519, SRX8827520, SRX8827521, SRX8827543, SRX8827544, SRX8827545, SRX8…
CTCF	TFs and others	Lung	DRX205076, DRX205077, DRX233482, DRX233483, ERX2868710, ERX2868711, ERX2868712, ERX2869656, ERX2869660, ERX2869664, ERX2869668, SRX038664, SRX038665, SRX067446, SRX080347, SRX080362, SRX080380, SRX080432, SRX080442, SRX100498, SRX100501, SRX102988, SRX10346815, SRX10346816, SRX10346817, SRX10346818, SRX10976484, SRX10976485, SRX10976701, SRX10976702, SRX10976863, SRX10976864, SRX11312421, SRX1131…
H3K23ac	Histone	Lung	SRX2781288, SRX2781297, SRX2781306, SRX2781317, SRX3324931, SRX3324932, SRX3324933, SRX3324934
H3K122ac	Histone	Lung	SRX3324939, SRX3324940, SRX3324941, SRX3324942
ZBTB11	TFs and others	Lung	SRX15898392
ZBTB33	TFs and others	Lung	SRX190288
H4K16ac	Histone	Lung	SRX4230305, SRX502816, SRX502817, SRX502818, SRX502819, SRX620742, SRX620743
ATOH8	TFs and others	Lung	SRX10476749, SRX10476750, SRX13293443
LMNB1	TFs and others	Lung	SRX1112993, SRX1112994, SRX130255, SRX392040

## Sheet: Muscle
Antigen	Antigen class	Cell type class	Accession ID
SS18	TFs and others	Muscle	SRX3468032, SRX3468033, SRX3927303, SRX3927307, SRX7015654, SRX7015655
TFAP2A	TFs and others	Muscle	SRX11470528, SRX11470529, SRX13340343, SRX13340346
H3K9me3	Histone	Muscle	SRX067481, SRX10187510, SRX10187511, SRX10775966, SRX16498522, SRX16498523, SRX17846508, SRX17846510, SRX17846512, SRX17846529, SRX17846531, SRX186678, SRX2630177, SRX2630178, SRX2636206, SRX2636207, SRX2636512, SRX2636513, SRX2636514, SRX2636515, SRX3010233, SRX4957968, SRX7115498, SRX7509319, SRX7509320, SRX7509321, SRX7509322, SRX8428916, SRX8428917, SRX8428922, SRX8428923, SRX9031628, SRX9031…
SOX8	TFs and others	Muscle	SRX4313203, SRX5930146, SRX5930147
FOXO1	TFs and others	Muscle	SRX9674611, SRX9674613, SRX9674615, SRX9674619, SRX9674621, SRX9674623, SRX9674625
RNA polymerase II	RNA polymerase	Muscle	SRX15845259, SRX15845260, SRX15845261, SRX15845262, SRX15845263, SRX15845264, SRX15845265, SRX15845266, SRX15845267, SRX15845268, SRX15845269, SRX15845270, SRX15845271, SRX15845272, SRX15845273, SRX15845274, SRX15845275, SRX15845276, SRX18458558, SRX18458559, SRX18458560, SRX18458561, SRX18458562, SRX18458563, SRX1998426, SRX1998427, SRX3321914, SRX3322224, SRX3960593, SRX3960594, SRX4313210, SRX…
H2A.Z	Histone	Muscle	SRX067497, SRX067511, SRX2635798, SRX2635799
EHMT2	TFs and others	Muscle	SRX4561210, SRX5316603
H3K4me2	Histone	Muscle	SRX038592, SRX038593, SRX067451, SRX067519, SRX1878898, SRX1998413, SRX2636500, SRX2636501, SRX7107042, SRX7107043, SRX7107046, SRX7107047
H3K27ac	Histone	Muscle	SRX038584, SRX038585, SRX067417, SRX067506, SRX10187484, SRX10187485, SRX10660630, SRX10660631, SRX10660632, SRX11470435, SRX11470452, SRX11470456, SRX11470465, SRX11470475, SRX11470481, SRX11470490, SRX11470495, SRX11470520, SRX12007569, SRX12007570, SRX12007571, SRX12007572, SRX12007573, SRX12007574, SRX12007575, SRX12007576, SRX13340337, SRX13340340, SRX15589312, SRX15589313, SRX15589314, SRX1…
pFM2	TFs and others	Muscle	SRX018651, SRX018654, SRX018655, SRX018657
SMARCC1	TFs and others	Muscle	SRX3468034, SRX7015656, SRX7015657, SRX9562903, SRX9562906, SRX9562908, SRX9562909
MLXIP	TFs and others	Muscle	SRX5391034, SRX5391035
BRD4	TFs and others	Muscle	SRX1878887, SRX1878888, SRX7582520, SRX7582521
Epitope tags	TFs and others	Muscle	SRX1470542, SRX1470544, SRX15939724, SRX15939725, SRX1596304, SRX5341939, SRX5341940, SRX7115505, SRX7115506, SRX9684229, SRX9684230, SRX9684239, SRX9684240
RBBP4	TFs and others	Muscle	SRX7115500, SRX8907434, SRX8907439
H3K27me3	Histone	Muscle	SRX038586, SRX038587, SRX067418, SRX10187461, SRX10187462, SRX10949089, SRX10949090, SRX10949097, SRX10949098, SRX10949233, SRX10949234, SRX10977309, SRX16499962, SRX16499963, SRX18458555, SRX18458585, SRX186699, SRX1878895, SRX1998407, SRX1998408, SRX1998409, SRX1998410, SRX2630263, SRX2630264, SRX2630265, SRX2635986, SRX2635987, SRX3010285, SRX3468038, SRX4394207, SRX4394208, SRX4957966, SRX534…
H3K4me3	Histone	Muscle	SRX038594, SRX038595, SRX067388, SRX067489, SRX10187570, SRX10187571, SRX10187572, SRX10187756, SRX10187757, SRX10949087, SRX10949088, SRX10949095, SRX10949096, SRX10949231, SRX10949232, SRX11470436, SRX11470461, SRX11470466, SRX11470476, SRX11470482, SRX11470488, SRX11470489, SRX11470494, SRX11470522, SRX1596299, SRX1596307, SRX16495747, SRX16495748, SRX18458583, SRX18458584, SRX1878899, SRX1899…
H3.3	Histone	Muscle	SRX2636160, SRX2636161
H3K36me3	Histone	Muscle	SRX038588, SRX038589, SRX067453, SRX067468, SRX10187819, SRX10187820, SRX14473792, SRX14473797, SRX14473798, SRX14473799, SRX16495626, SRX16495627, SRX1878896, SRX1998411, SRX2630202, SRX2630203, SRX2635966, SRX2635967, SRX2635968, SRX2635969, SRX2636121, SRX2636122, SRX3010251, SRX4394211, SRX4394212, SRX7015676, SRX7509572, SRX7509573, SRX8428918, SRX8428919, SRX8428924, SRX8428925, SRX9031612,…
SNAI2	TFs and others	Muscle	SRX6824681, SRX6824682
EP300	TFs and others	Muscle	SRX10809802, SRX10809803, SRX11470500, SRX11470501, SRX1878906
ETV6	TFs and others	Muscle	SRX13208369, SRX13208370
H3K79me2	Histone	Muscle	SRX067478, SRX067492, SRX2635929, SRX2635930
MED1	TFs and others	Muscle	SRX1878902, SRX668234
MYC	TFs and others	Muscle	SRX3960591, SRX3960592
EWSR1	TFs and others	Muscle	SRX11470438, SRX11470439, SRX11470473, SRX11470474
H4K20me1	Histone	Muscle	SRX038598, SRX038599, SRX067395, SRX067427, SRX2630316, SRX2630317
H3K36ac	Histone	Muscle	SRX4313215, SRX4313216
MAPK1	TFs and others	Muscle	SRX1998400, SRX1998401
MTA2	TFs and others	Muscle	SRX8907431, SRX8907435, SRX8907440
ATF1	TFs and others	Muscle	SRX11470453, SRX11470454, SRX11470457, SRX11470458, SRX11470463, SRX11470468, SRX11470469, SRX11470471, SRX11470478, SRX11470479, SRX11470484, SRX11470485, SRX11470492, SRX11470493, SRX11470496, SRX11470497, SRX11470518, SRX11470519, SRX13340335, SRX13340336, SRX13340338, SRX13340339
HDAC1	TFs and others	Muscle	SRX4313223
PGR	TFs and others	Muscle	SRX185708
RAD21	TFs and others	Muscle	SRX1878907, SRX4313217, SRX4313218, SRX4313224, SRX4313225
YY1	TFs and others	Muscle	SRX4313226, SRX4313227
HDAC3	TFs and others	Muscle	SRX5930140, SRX5930141
DPF2	TFs and others	Muscle	SRX9562901, SRX9674626
VDR	TFs and others	Muscle	SRX21849426
CASZ1	TFs and others	Muscle	SRX5341941, SRX5341942, SRX5341953, SRX5341954
MYOD1	TFs and others	Muscle	SRX10660636, SRX10660637, SRX10660638, SRX15939716, SRX15939717, SRX15939718, SRX15939719, SRX17846516, SRX17846517, SRX17846518, SRX17846519, SRX17846524, SRX17846525, SRX17846526, SRX17846527, SRX1878904, SRX1998421, SRX1998422, SRX1998423, SRX21446101, SRX21446102, SRX341010, SRX341011, SRX341012, SRX5930144, SRX5930145, SRX6824683, SRX6824684
H3K9ac	Histone	Muscle	SRX038596, SRX038597, SRX067390, SRX067526, SRX2636061, SRX2636062, SRX7115497, SRX9562894, SRX9562899
DUX4	TFs and others	Muscle	SRX107284, SRX107285
ATAC-Seq	ATAC-Seq	Muscle	SRX10475287, SRX10475288, SRX10475397, SRX10475398, SRX10475406, SRX10475818, SRX10476691, SRX10476692, SRX10476734, SRX10476735, SRX10661056, SRX10661505, SRX11465140, SRX11465141, SRX11465142, SRX11465146, SRX11465147, SRX11465148, SRX12007553, SRX12007554, SRX12007555, SRX12007556, SRX12007557, SRX12007558, SRX12007559, SRX12007560, SRX12007561, SRX12007562, SRX12007563, SRX12007564, SRX120075…
TRF2	TFs and others	Muscle	SRX2254716, SRX2254717, SRX2254718, SRX2254719
PRRX1	TFs and others	Muscle	SRX15235740, SRX15235741
MYF5	TFs and others	Muscle	SRX1962094
SOX10	TFs and others	Muscle	SRX13340334, SRX13340342, SRX13340345, SRX13340348
SMARCA4	TFs and others	Muscle	SRX15939728, SRX15939729, SRX15939730, SRX15939731, SRX3468035, SRX9562886, SRX9562887, SRX9562891, SRX9562896, SRX9562902, SRX9562905
SIX1	TFs and others	Muscle	SRX10660633, SRX10660634, SRX10660635
H3K9me2	Histone	Muscle	SRX18458556, SRX18458557
PBRM1	TFs and others	Muscle	SRX9562888, SRX9562889
MITF	TFs and others	Muscle	SRX13340333, SRX13340341, SRX13340344, SRX13340347
HDAC2	TFs and others	Muscle	SRX4313202, SRX4313219, SRX4313220, SRX9562892, SRX9562897
H3	Histone	Muscle	SRX1596298, SRX1596306, SRX17658246, SRX17658247, SRX7070018, SRX7070019
MYOG	TFs and others	Muscle	SRX1878905, SRX1998424, SRX1998425, SRX5930148, SRX5930149
H2BK5ac	Histone	Muscle	SRX5930153, SRX5930154
H3K4me1	Histone	Muscle	SRX038590, SRX038591, SRX067412, SRX067512, SRX10187504, SRX10187505, SRX10187506, SRX10187507, SRX10187716, SRX10187717, SRX11470437, SRX11470460, SRX11470467, SRX11470477, SRX11470483, SRX11470487, SRX11470499, SRX11470505, SRX11470521, SRX16495735, SRX16495736, SRX1878897, SRX1998412, SRX2630227, SRX2630228, SRX2630229, SRX2630268, SRX2630269, SRX3009978, SRX3010146, SRX7623420, SRX7623422, SR…
MYCN	TFs and others	Muscle	SRX1878903, SRX9562910, SRX9562911, SRX9562912, SRX9562913
EZH2	TFs and others	Muscle	SRX186680, SRX186719, SRX1998402, SRX1998403
SUPT16H	TFs and others	Muscle	SRX4394225, SRX4394226
CTCF	TFs and others	Muscle	SRX038582, SRX038583, SRX067513, SRX067534, SRX10476782, SRX10476783, SRX10949091, SRX10949092, SRX10949099, SRX10949100, SRX10949235, SRX10949236, SRX10976875, SRX10976876, SRX16498392, SRX16498393, SRX17846495, SRX17846499, SRX17846500, SRX17846501, SRX17846502, SRX17846513, SRX17846514, SRX17846515, SRX1878889, SRX1878890, SRX3322290, SRX3322306, SRX3323006, SRX3927305, SRX7509481, SRX7509482
BRD9	TFs and others	Muscle	SRX3927304, SRX3927308, SRX9562900, SRX9674627
H4K16ac	Histone	Muscle	SRX5930155, SRX5930156

## Sheet: Breast
Antigen	Antigen class	Cell type class	Accession ID
FOS	TFs and others	Breast	SRX039139, SRX039140, SRX150476, SRX150477, SRX150478, SRX150517, SRX3322636, SRX3322637, SRX4192879, SRX4192880, SRX9534927
RAD51	TFs and others	Breast	SRX2453443, SRX2453452, SRX3322394, SRX3322395
TP53	TFs and others	Breast	SRX14812502, SRX14812503, SRX1728403, SRX2060921, SRX2060922, SRX2585782, SRX285808, SRX2924012, SRX2924013, SRX2924014, SRX2924015, SRX2924016, SRX2924017, SRX2924018, SRX2940746, SRX2940758, SRX3025913, SRX3025914, SRX3025916, SRX3025917, SRX3087156, SRX3087158, SRX3087159, SRX3734320, SRX3734321, SRX4649667, SRX4649670, SRX647703, SRX647704, SRX647705, SRX647706, SRX647707, SRX7130718, SRX7130…
ESRRG	TFs and others	Breast	SRX7627555, SRX7627556
FGFR1	TFs and others	Breast	SRX8083086, SRX8083087, SRX8083101, SRX8083102, SRX8083104, SRX8083105, SRX8246294, SRX8246295, SRX8246296, SRX8617941, SRX8617942, SRX8617944, SRX8617945
CEBPB	TFs and others	Breast	SRX190345, SRX2194247, SRX2194248, SRX2194249, SRX2194250
PKNOX1	TFs and others	Breast	SRX2424710, SRX2424711
STAG2	TFs and others	Breast	SRX15929728, SRX15929730, SRX15929737, SRX15929738, SRX15929739, SRX3040148, SRX3040152, SRX3589919, SRX3589920, SRX3589923, SRX3589924, SRX3589927, SRX3589928
TFAP2A	TFs and others	Breast	SRX233463
TEAD1	TFs and others	Breast	SRX10119371, SRX10119372, SRX10119373, SRX10119374, SRX10119391, SRX10119392, SRX3401272, SRX3401283, SRX7101363, SRX7101364, SRX7101365, SRX7101366
FOXA1	TFs and others	Breast	SRX028634, SRX028635, SRX039137, SRX039138, SRX039145, SRX039146, SRX10024479, SRX10024480, SRX10024481, SRX10024482, SRX10024491, SRX10024492, SRX10024493, SRX10024494, SRX100454, SRX10184538, SRX10184539, SRX10306473, SRX10468633, SRX10468634, SRX10468635, SRX10468636, SRX11222437, SRX11222438, SRX11222441, SRX11222442, SRX1161172, SRX1161173, SRX1161174, SRX1161175, SRX1161176, SRX1161177, SRX…
TEAD4	TFs and others	Breast	SRX18013280, SRX18013281, SRX18013282, SRX18013283, SRX190316, SRX5287686, SRX5287687, SRX5287692, SRX5287693, SRX5287704, SRX5287707, SRX6831823, SRX6831824, SRX6831825, SRX883582, SRX883583
ATF7	TFs and others	Breast	SRX3323022, SRX3323023
H3K9me3	Histone	Breast	SRX038737, SRX038738, SRX061990, SRX11016892, SRX11016893, SRX11016894, SRX11016895, SRX12008852, SRX12008854, SRX12008855, SRX12008857, SRX1426072, SRX1426077, SRX152078, SRX153148, SRX16028845, SRX16028846, SRX16495389, SRX16495390, SRX16761095, SRX16761096, SRX16761097, SRX16761098, SRX186681, SRX19495899, SRX19495900, SRX19495901, SRX19495902, SRX19917980, SRX19917981, SRX19917991, SRX1991799…
BANP	TFs and others	Breast	SRX8873457, SRX8873458
SUZ12	TFs and others	Breast	SRX10664177, SRX10664178, SRX10664179, SRX10664180, SRX10664181, SRX10664182, SRX10664183, SRX10664184, SRX13254861, SRX13254862, SRX13254863, SRX13254864, SRX13254865, SRX13254866, SRX13254867, SRX13254868, SRX2900154, SRX2900155, SRX3322942, SRX3322943
MBD2	TFs and others	Breast	SRX2636529, SRX2636530, SRX471210, SRX471212, SRX471215, SRX545943, SRX758323, SRX758326
KMT2C	TFs and others	Breast	SRX11867600, SRX11867601, SRX11867602, SRX11867603, SRX11867604, SRX11867605, SRX11867608, SRX11867609, SRX11867610, SRX11867611, SRX1787675, SRX1787676, SRX1787677, SRX1787678, SRX1787679, SRX1787680, SRX1787681, SRX1787682, SRX1787683, SRX1787684, SRX2880132, SRX2900150, SRX2900151, SRX2900152, SRX2900153, SRX4786554, SRX4786555, SRX4786562, SRX4786563
E2F1	TFs and others	Breast	SRX150556, SRX2585781, SRX734309
NFKB1	TFs and others	Breast	SRX4192885, SRX4192886
SIN3A	TFs and others	Breast	SRX17989899, SRX17989900, SRX190318, SRX19662639, SRX19662640, SRX2424161, SRX2424162
H3K14ac	Histone	Breast	SRX038745, SRX038746, SRX12771706, SRX12771707, SRX3583259, SRX3583260, SRX395610, SRX395611
RNA polymerase II	RNA polymerase	Breast	DRX013206, DRX013209, SRX003941, SRX003942, SRX003943, SRX003944, SRX016703, SRX016704, SRX016705, SRX019931, SRX019932, SRX019933, SRX019934, SRX019935, SRX019936, SRX036561, SRX036562, SRX038747, SRX038748, SRX099867, SRX099868, SRX100270, SRX100271, SRX102994, SRX10306429, SRX10306476, SRX10365509, SRX10365510, SRX10365511, SRX10365512, SRX10365513, SRX10365553, SRX10365554, SRX10365555, SRX10…
ELK1	TFs and others	Breast	SRX2423865, SRX2423866
H2A.Z	Histone	Breast	SRX186696, SRX2630151, SRX2630152, SRX283650, SRX283651, SRX3677677, SRX3677678, SRX535413, SRX535414, SRX535423, SRX535424, SRX7423960, SRX755287
GRHL2	TFs and others	Breast	SRX15221363, SRX15221364, SRX15221365, SRX15221366, SRX15221367, SRX15221368, SRX15221369, SRX15221370, SRX15221371, SRX15221372, SRX15221373, SRX15221374, SRX15221375, SRX15221376, SRX15221377, SRX15221378, SRX15221379, SRX15221380, SRX1787656, SRX1787657, SRX1787658, SRX3931057, SRX3931058, SRX3931059, SRX3931096, SRX3931097, SRX3931098, SRX6896408, SRX6896409
RFX1	TFs and others	Breast	SRX2423398, SRX2423399, SRX2424431, SRX2424432
TRIM25	TFs and others	Breast	SRX1660871, SRX1660872, SRX1660873, SRX1660875, SRX1660876, SRX1660877
TRIM28	TFs and others	Breast	SRX12813813, SRX12813814, SRX1497516, SRX7030916, SRX7030917, SRX7030918, SRX7030919
ESR2	TFs and others	Breast	SRX8272752, SRX8272753, SRX8272754
EHMT2	TFs and others	Breast	SRX7030880, SRX7030881, SRX7030882, SRX7030883
KAT2B	TFs and others	Breast	SRX14101904, SRX14101905, SRX14101919, SRX14101920
RBPJ	TFs and others	Breast	SRX2947200, SRX4374901, SRX4374902, SRX4374903, SRX4374904, SRX4374939, SRX4374940, SRX4374941, SRX4374942
XBP1	TFs and others	Breast	SRX384488, SRX384489, SRX384490, SRX384491, SRX389294
NR3C1	TFs and others	Breast	SRX1161164, SRX1161165, SRX1161166, SRX1161167, SRX1161179, SRX1161180, SRX1161181, SRX1161182, SRX1161194, SRX1161195, SRX1161196, SRX1161197, SRX19024865, SRX19024866, SRX19024867, SRX19024868, SRX19024869, SRX19024870, SRX19024878, SRX19024879, SRX19024880, SRX3070467, SRX3070468, SRX3070469, SRX3070470, SRX3070471, SRX3070472, SRX3070473, SRX3070474, SRX3070475, SRX3070476, SRX3229135, SRX322…
RNF2	TFs and others	Breast	SRX10775017, SRX10775020, SRX10775023, SRX10775027, SRX10775029, SRX10775041, SRX10775045, SRX10775049, SRX10775053, SRX10775057, SRX19321943, SRX19321944, SRX19321945, SRX19321946, SRX19321947, SRX19321948, SRX19321949, SRX19321950, SRX3410378, SRX3410396, SRX396573, SRX6860622, SRX6860634, SRX6860639, SRX6860645, SRX6860650, SRX6860689, SRX6860694, SRX6896410, SRX6896411
STAT3	TFs and others	Breast	SRX10119379, SRX10119380, SRX10119381, SRX10119382, SRX10119393, SRX10119394, SRX150479, SRX150536, SRX150630, SRX150670, SRX2020838, SRX2020839, SRX2020840, SRX2020841, SRX2020842, SRX2020843, SRX2020844, SRX2020845, SRX2020846, SRX2020847, SRX2020848, SRX2020849, SRX4192887, SRX4192888, SRX5323815, SRX5323816, SRX5323817, SRX5323818, SRX5323819, SRX5323820, SRX5323821, SRX5323822, SRX5323831, S…
RCOR1	TFs and others	Breast	SRX10306471, SRX10306480, SRX14612999, SRX14613010, SRX2423882, SRX2423883
NRIP1	TFs and others	Breast	ERX470433, ERX470434, ERX470435, ERX470436
ZNF444	TFs and others	Breast	SRX5457180, SRX5457181
GREB1	TFs and others	Breast	SRX194570, SRX194571, SRX194573, SRX194574, SRX194576
H3K4me2	Histone	Breast	SRX007141, SRX026906, SRX026907, SRX038572, SRX038573, SRX067405, SRX088974, SRX088975, SRX10306485, SRX10306486, SRX103263, SRX103264, SRX10637293, SRX10637294, SRX1117701, SRX1117702, SRX1286274, SRX1286275, SRX1286276, SRX1286327, SRX1286328, SRX1286329, SRX142962, SRX14612973, SRX14612974, SRX14612975, SRX14612976, SRX14612979, SRX14613011, SRX1521307, SRX1521312, SRX2636429, SRX2636430, SRX2…
KDM5B	TFs and others	Breast	SRX055308, SRX055309, SRX055310, SRX055311, SRX055312, SRX265412, SRX265413, SRX265414, SRX265420, SRX265422, SRX265423, SRX265425, SRX265430, SRX265432, SRX3285561, SRX3285563, SRX3285565, SRX3285576, SRX3285578, SRX3285580, SRX3285582, SRX3285584, SRX3285586, SRX3285588, SRX3285589, SRX3285591, SRX3285592, SRX3285594, SRX3285595, SRX3285597, SRX3285598, SRX3285604, SRX3285605, SRX3285606, SRX32…
TP73	TFs and others	Breast	SRX10641820, SRX10641846
NELFA	TFs and others	Breast	SRX2642968, SRX7030928, SRX7030929, SRX7030930, SRX7030931, SRX7030932
AR	TFs and others	Breast	SRX10365514, SRX10365515, SRX1070160, SRX1070161, SRX1070162, SRX1070163, SRX11149848, SRX11149854, SRX11149855, SRX1339015, SRX1339016, SRX1339017, SRX1339018, SRX1339019, SRX1339020, SRX250092, SRX3229133, SRX3229134, SRX3229166, SRX3229167, SRX3229168, SRX3229169, SRX3229170, SRX3229171, SRX3229172, SRX3229173, SRX3229174, SRX5128107, SRX5128108, SRX5128109, SRX5128130, SRX5128131, SRX5493746,…
JUNB	TFs and others	Breast	SRX10119383, SRX10119384, SRX10119385, SRX10119386, SRX10119395, SRX10119396, SRX18014932, SRX18014933, SRX4192881, SRX4192882, SRX8488073, SRX8488074, SRX8488088, SRX8488089, SRX9046306, SRX9046307
CHD8	TFs and others	Breast	ERX2242380, ERX2242386, ERX2242392, ERX2242398, ERX2242404, ERX2242406, SRX734338, SRX734339, SRX734340, SRX734341, SRX734342
H3K27ac	Histone	Breast	DRX013207, ERX2242383, ERX2242389, ERX2242395, ERX2242401, ERX2242408, ERX2242413, ERX371661, ERX371665, ERX371669, ERX371672, ERX371676, ERX371680, ERX371684, ERX371687, ERX371691, ERX371695, ERX371699, ERX371702, ERX371706, ERX371710, ERX371714, ERX371717, SRX038564, SRX038565, SRX061991, SRX067411, SRX10024483, SRX10024484, SRX10024485, SRX10024486, SRX10024495, SRX10024496, SRX10024497, SRX10…
RELA	TFs and others	Breast	SRX1044414, SRX1044415, SRX1044416, SRX1100309, SRX1100310, SRX1100311, SRX1100312, SRX1100313, SRX1100314, SRX17682345, SRX17682346, SRX17682347, SRX17682348, SRX17682349, SRX17682350, SRX17682351, SRX17682352, SRX19210521, SRX19210522, SRX19210523, SRX19210547, SRX19210548, SRX19210549, SRX747783, SRX747784, SRX747785, SRX747786, SRX747787, SRX747788, SRX747789, SRX747790, SRX968971, SRX968972,…
SMARCC1	TFs and others	Breast	SRX10306479, SRX10859413, SRX10859414, SRX14612977, SRX14612978, SRX14613001, SRX14613002, SRX14613014, SRX2662142, SRX2662145, SRX386755, SRX386757, SRX386759, SRX386761, SRX5172061, SRX5172064, SRX7121993, SRX7121996
BRD4	TFs and others	Breast	ERX371660, ERX371664, ERX371668, ERX371671, ERX371675, ERX371679, ERX371683, ERX371686, ERX371690, ERX371694, ERX371698, ERX371701, ERX371705, ERX371709, ERX371713, ERX371716, SRX10579964, SRX1131549, SRX1131550, SRX1131552, SRX1131553, SRX1131555, SRX1131556, SRX1131558, SRX1131559, SRX1131563, SRX1131564, SRX1131571, SRX1131572, SRX1224601, SRX1224602, SRX1224603, SRX18454201, SRX18454202, SRX2…
CBX3	TFs and others	Breast	SRX13327957, SRX13327958, SRX13327959, SRX13327960, SRX13327961, SRX13327962, SRX13327963, SRX13327966, SRX13327967, SRX13327974, SRX13327975, SRX13327976, SRX13327977, SRX13327991, SRX13327992, SRX13327993, SRX13327994, SRX13327995, SRX13327996, SRX6712570, SRX6712571, SRX6712572, SRX6712573, SRX822009, SRX822010
Epitope tags	TFs and others	Breast	SRX054571, SRX054572, SRX054573, SRX054574, SRX054575, SRX054576, SRX10040036, SRX10335184, SRX10335185, SRX1065300, SRX1065301, SRX10721428, SRX10721429, SRX10721430, SRX10721431, SRX10775079, SRX10775081, SRX1156520, SRX1156521, SRX1156522, SRX1156523, SRX1165108, SRX1165109, SRX1165110, SRX13255928, SRX13255929, SRX13327973, SRX13327997, SRX13327998, SRX13327999, SRX13340673, SRX13340674, SRX1…
KAT2A	TFs and others	Breast	SRX21459802, SRX21459803, SRX21459804, SRX21459805, SRX21459806, SRX21459807
ELF1	TFs and others	Breast	SRX190220, SRX3322264, SRX3322265, SRX3322520, SRX3322521
ESR1	TFs and others	Breast	SRX003937, SRX003938, SRX003939, SRX003940, SRX016326, SRX016327, SRX026529, SRX026530, SRX026531, SRX026532, SRX026902, SRX026903, SRX036563, SRX036564, SRX042342, SRX042343, SRX10024461, SRX10024462, SRX10024465, SRX10024466, SRX10024469, SRX10024470, SRX10024473, SRX10024474, SRX100265, SRX100266, SRX100419, SRX100564, SRX100584, SRX1012594, SRX1012595, SRX1012596, SRX1012597, SRX1012598, SRX1…
ARID1B	TFs and others	Breast	SRX5534859, SRX5534860, SRX7692224, SRX7692225
KDM5A	TFs and others	Breast	SRX1721564, SRX1721565
RUVBL2	TFs and others	Breast	SRX7423961, SRX9424462, SRX9424463
NCAPG2	TFs and others	Breast	SRX730435, SRX730436
ERG	TFs and others	Breast	SRX063917, SRX063918
MAFK	TFs and others	Breast	SRX5457178, SRX5457179
H3K27me3	Histone	Breast	DRX013212, ERX2242382, ERX2242388, ERX2242394, ERX2242400, ERX2242407, ERX2242410, ERX2242412, ERX2242415, SRX036546, SRX036549, SRX036552, SRX036554, SRX036556, SRX036558, SRX038566, SRX038567, SRX038735, SRX038736, SRX061993, SRX067473, SRX10045369, SRX10045370, SRX10045371, SRX10045373, SRX10045374, SRX1023529, SRX1023530, SRX10583043, SRX10583044, SRX10583045, SRX10583047, SRX10583048, SRX105…
H3K4me3	Histone	Breast	DRX013205, SRX016701, SRX016702, SRX036547, SRX036550, SRX038574, SRX038575, SRX038741, SRX038742, SRX061988, SRX067463, SRX10001290, SRX10001291, SRX10001292, SRX10001293, SRX10001294, SRX10001295, SRX10001342, SRX10001343, SRX10001344, SRX10001345, SRX10001346, SRX10001347, SRX10045336, SRX10399322, SRX10399323, SRX10399324, SRX10399325, SRX1043544, SRX1043545, SRX1043550, SRX1043551, SRX104355…
SMC1A	TFs and others	Breast	SRX10773090, SRX10773091, SRX10773092, SRX10773093, SRX10773094, SRX10773096, SRX1531790, SRX1531795, SRX15929725, SRX15929726, SRX3040149, SRX3040153, SRX4192958, SRX4192959, SRX4374905, SRX6712619, SRX6712620, SRX6712621, SRX6712622
E2F4	TFs and others	Breast	SRX150480, SRX194566, SRX194567, SRX3322322, SRX3322323
NCAPG	TFs and others	Breast	SRX6712596, SRX6712597, SRX730427, SRX730428, SRX730429, SRX730430, SRX730431, SRX730432, SRX730433, SRX730434, SRX730437, SRX730438, SRX730454, SRX730455
OVOL1	TFs and others	Breast	SRX10475704, SRX10475705
H3K36me3	Histone	Breast	DRX013208, SRX007142, SRX038568, SRX038569, SRX061995, SRX067458, SRX10976250, SRX10976251, SRX10976252, SRX142960, SRX142961, SRX142963, SRX16028847, SRX16028848, SRX160850, SRX16335114, SRX16335115, SRX16497638, SRX16497639, SRX19767361, SRX19767362, SRX1997935, SRX1997936, SRX1997953, SRX1997954, SRX1997971, SRX1997972, SRX1997989, SRX1997990, SRX1998007, SRX1998008, SRX1998026, SRX1998027, SR…
NCOA1	TFs and others	Breast	SRX095407, SRX095408, SRX2578890, SRX2578891, SRX2578892, SRX2578893, SRX2578894, SRX2578895, SRX2578896, SRX2578897
WWTR1	TFs and others	Breast	SRX10119367, SRX10119368, SRX10119369, SRX10119370, SRX10119377, SRX10119378, SRX10119389, SRX10119390, SRX883578, SRX883579
GATA3	TFs and others	Breast	SRX060810, SRX060811, SRX100559, SRX10184540, SRX10184541, SRX104409, SRX11149845, SRX11149846, SRX11149852, SRX11149853, SRX11150127, SRX11150129, SRX11150130, SRX11150132, SRX11150133, SRX1156472, SRX1156473, SRX1156476, SRX1156477, SRX1156478, SRX1156479, SRX13327987, SRX13327988, SRX13327989, SRX13327990, SRX13340681, SRX13340682, SRX13340683, SRX13340684, SRX13340685, SRX13340686, SRX1334068…
RFX5	TFs and others	Breast	SRX3322787, SRX3322788
BRD2	TFs and others	Breast	SRX4377528, SRX4377529, SRX4377530, SRX4377531, SRX4377537, SRX4377538, SRX4377539, SRX4377540, SRX4377541, SRX4377542, SRX4377543, SRX4377544, SRX4377545, SRX4377546, SRX4377547, SRX4377548, SRX4377549, SRX4377550, SRX4377551, SRX4377552, SRX4377553, SRX4377554, SRX5824560, SRX5824561, SRX5824565, SRX5824566, SRX5824569, SRX5824570, SRX5824574, SRX5824575, SRX5824578, SRX5824579, SRX5824584, SRX…
GFP	TFs and others	Breast	SRX10239457, SRX10239458, SRX13323810, SRX13323811, SRX13323812, SRX13323813, SRX3536216, SRX3536222, SRX5734997, SRX5734998, SRX8111166, SRX8111167, SRX8111168
H3K4ox	Histone	Breast	SRX2631631, SRX2631632, SRX7423958, SRX7423959
MAU2	TFs and others	Breast	SRX11120875, SRX11120876, SRX11120892, SRX11120893
TRPS1	TFs and others	Breast	SRX3401273, SRX3401284, SRX4060991, SRX4060992, SRX4096881, SRX4096882, SRX4096883, SRX4096884, SRX4096885, SRX4096886, SRX4096887, SRX4096888, SRX4096890, SRX4096891, SRX4561215, SRX6098144, SRX6098145, SRX6098150, SRX6098151
ZBTB17	TFs and others	Breast	SRX318858, SRX647368, SRX647369, SRX647370, SRX647371, SRX647372
SNAI2	TFs and others	Breast	SRX14101940, SRX14101941, SRX14101949, SRX14101950, SRX19888699, SRX19888700, SRX19888702, SRX19888703
TP63	TFs and others	Breast	SRX10641821, SRX10641822, SRX1143681, SRX1143683, SRX1143685, SRX17834042, SRX17834043, SRX3734314, SRX3734319, SRX4017879, SRX4017880, SRX4017881, SRX4017882, SRX4017883, SRX4017884, SRX4017885, SRX4017886, SRX4017887, SRX4649668, SRX4649671, SRX7700193
XRCC6	TFs and others	Breast	SRX13327970, SRX13327971, SRX13327972, SRX13327978, SRX13327979, SRX13327980, SRX13327981, SRX13327982, SRX13327983, SRX13327984
CTNNB1	TFs and others	Breast	SRX13991431, SRX13991432, SRX4815187, SRX4815188, SRX4815189, SRX4815190
EBF1	TFs and others	Breast	SRX10773086, SRX10773087, SRX10773088, SRX10773089, SRX13993200, SRX13993203, SRX13993206, SRX13993208
AHR	TFs and others	Breast	SRX201314, SRX20282935, SRX20282936, SRX20282937, SRX20282941, SRX20282942, SRX20282943, SRX20282950, SRX20282951, SRX20282952, SRX20282956, SRX20282957, SRX20282958, SRX20282962, SRX20282963, SRX20282964, SRX20282968, SRX20282969, SRX20282970, SRX2378690, SRX2378691, SRX2378694, SRX2378695
ARID1A	TFs and others	Breast	ERX2242381, ERX2242387, ERX2242393, ERX2242399, ERX2242409, ERX2242411, ERX2242414, ERX2666242, SRX10421402, SRX10421405, SRX10859400, SRX10859401, SRX13941916, SRX13941919, SRX14284263, SRX14284264, SRX14284267, SRX14284268, SRX5089376, SRX5089377, SRX5089378, SRX5089379, SRX5089380, SRX5089381, SRX5089382, SRX5089383, SRX5089384, SRX5089385, SRX5089386, SRX5089387, SRX5089388, SRX5089389, SRX50…
CUX1	TFs and others	Breast	SRX2424762, SRX2424763
EN1	TFs and others	Breast	SRX4815184, SRX4815185, SRX4815186, SRX5574443, SRX5574444, SRX5574445, SRX7865938, SRX7865941
Biotin	TFs and others	Breast	SRX4561224, SRX4561225, SRX4561226, SRX4561227, SRX4561228, SRX4561229, SRX4561230, SRX4561231, SRX4561232, SRX5287709, SRX5287710, SRX5287711, SRX5287712, SRX5287713, SRX5287714, SRX673711, SRX673712, SRX673713, SRX673714, SRX673715, SRX673716, SRX673717, SRX673718, SRX673719, SRX673720, SRX673721, SRX673724, SRX673725, SRX673726
TFE3	TFs and others	Breast	SRX15430989, SRX15430990, SRX15430995, SRX15430996, SRX15431001, SRX15431002, SRX15670543, SRX15670544, SRX15670546, SRX15670547
ZNF143	TFs and others	Breast	SRX1510969, SRX1510970, SRX1510971, SRX1510972
TCF7L2	TFs and others	Breast	SRX100943, SRX250094, SRX250095
H4K20me3	Histone	Breast	SRX16028849, SRX16028850, SRX5129620, SRX5129621, SRX7556189, SRX7556190, SRX7556191, SRX7556192, SRX7556193, SRX7556194, SRX8848824, SRX8848825, SRX8848826, SRX8848827, SRX8848828, SRX8848829
H3K56ac	Histone	Breast	SRX7030898, SRX7030899, SRX7030900, SRX7030901
ARNT	TFs and others	Breast	SRX201315, SRX4672372, SRX666557, SRX6853576, SRX6853577, SRX6853578, SRX6853580, SRX6853582, SRX6853596, SRX6853598, SRX6853600
FOXM1	TFs and others	Breast	SRX185907, SRX185908, SRX185909, SRX185910, SRX185911, SRX185912, SRX185913, SRX185914, SRX185915, SRX185916, SRX185917, SRX185918, SRX190225, SRX734307
RAC1	TFs and others	Breast	SRX10365516, SRX10365517, SRX10365518, SRX10365519, SRX10365522, SRX10365523, SRX10365526, SRX10365527, SRX10365537, SRX10365538, SRX10365539, SRX10365540, SRX10365541, SRX10365542, SRX10365543, SRX10365544
EP300	TFs and others	Breast	SRX060812, SRX060813, SRX100567, SRX1012606, SRX1012607, SRX1012608, SRX1012609, SRX1012610, SRX1012611, SRX1012612, SRX1012613, SRX1012614, SRX1012624, SRX1012637, SRX1012638, SRX1012639, SRX1012640, SRX1012641, SRX1012642, SRX1012643, SRX1012644, SRX1012645, SRX1012646, SRX1012647, SRX1012648, SRX1012649, SRX10921875, SRX11120887, SRX11120888, SRX11120894, SRX11120895, SRX1521303, SRX1521304, S…
PAD2	TFs and others	Breast	SRX10164572, SRX10164577, SRX10164582, SRX10164587, SRX10164592, SRX10164597, SRX10164602, SRX10164608, SRX10164614, SRX10164620, SRX10164626, SRX10164632, SRX10164638, SRX10164644, SRX10164650, SRX10164656, SRX10164662, SRX10164668
H3K79me2	Histone	Breast	SRX10976372, SRX10976373, SRX15216094, SRX15216095, SRX15216096, SRX15216097, SRX186753, SRX1997941, SRX1997942, SRX1997959, SRX1997960, SRX1997977, SRX1997978, SRX1997995, SRX1997996, SRX1998013, SRX1998014, SRX1998032, SRX1998033, SRX1998050, SRX1998051, SRX1998068, SRX1998069, SRX1998086, SRX1998087, SRX1998104, SRX1998105, SRX1998122, SRX1998123, SRX1998140, SRX1998141, SRX1998158, SRX1998159…
MED1	TFs and others	Breast	SRX13581731, SRX13581732, SRX13581733, SRX13581734, SRX13581735, SRX1531789, SRX1531794, SRX2194235, SRX2194236, SRX2194237, SRX2194238, SRX2578882, SRX2578883, SRX2578884, SRX2578885, SRX2578886, SRX2578887, SRX2578888, SRX2578889, SRX5287699, SRX5287700, SRX5287701, SRX5287702, SRX6712588, SRX6712589, SRX6712590, SRX6712591, SRX673729, SRX673730, SRX673747, SRX673748, SRX673749, SRX673750, SRX9…
DNMT3A	TFs and others	Breast	SRX3075718
TOE1	TFs and others	Breast	SRX3322720, SRX3322721
MYC	TFs and others	Breast	SRX099865, SRX099866, SRX103000, SRX103003, SRX14091666, SRX14091668, SRX14267235, SRX14267236, SRX14267243, SRX14267244, SRX150520, SRX150570, SRX16318944, SRX16318945, SRX16318946, SRX16318947, SRX1757998, SRX1757999, SRX188943, SRX188954, SRX19662632, SRX19662633, SRX2109209, SRX2109214, SRX2109219, SRX21459778, SRX21459779, SRX21459780, SRX21459781, SRX21459782, SRX21459783, SRX21459784, SRX2…
NELFE	TFs and others	Breast	SRX14101909, SRX14101924, SRX14101925, SRX14101933, SRX1758479, SRX1758480, SRX1758481, SRX1758482, SRX1758493, SRX1758494, SRX1758495, SRX1758496, SRX1758505, SRX1758506, SRX1758507, SRX1758508, SRX1758519, SRX1758520, SRX19888696, SRX19888697, SRX19888704, SRX19888705, SRX19888707, SRX19888708
TCF12	TFs and others	Breast	SRX190317
KDM6A	TFs and others	Breast	SRX11867606, SRX11867607, SRX15826236, SRX15826239, SRX15826242, SRX15826245, SRX2880133, SRX2880134, SRX2900156, SRX2900157, SRX2900158, SRX2900159, SRX4786575
H2A.XS139ph	Histone	Breast	SRX1122386, SRX1122387, SRX2453445, SRX2453455, SRX2935294, SRX2935295, SRX535353, SRX535354, SRX535355, SRX535356
H4K12ac	Histone	Breast	SRX3447361, SRX3447362, SRX3447363, SRX3447364, SRX3447365, SRX3447366, SRX3447367, SRX3447368, SRX3447369, SRX3447370, SRX876018, SRX876019, SRX876020, SRX876021, SRX876022, SRX876023, SRX876024
SPDEF	TFs and others	Breast	SRX10475380, SRX10475381, SRX323401, SRX323402, SRX323403
APOBEC3B	TFs and others	Breast	SRX523395, SRX523396
TET2	TFs and others	Breast	SRX2000339, SRX4786545, SRX4786546, SRX4786547, SRX4786552, SRX4786553, SRX4786568, SRX4786571, SRX4786572, SRX8616963, SRX8616964, SRX8616965, SRX8616966, SRX8616967, SRX8616968, SRX8616978, SRX8616980, SRX8616982, SRX8616987, SRX8616988, SRX8616997, SRX8616999, SRX8617000, SRX8617001, SRX8617002, SRX8617003, SRX8617004, SRX8617016, SRX8617018, SRX8617020, SRX8617022, SRX8617024, SRX9719173, SRX…
GTF3C2	TFs and others	Breast	SRX4714451, SRX4714455, SRX4714459, SRX4714480, SRX6639037, SRX6639038
ZBTB40	TFs and others	Breast	SRX2423849, SRX2423850
POU2F1	TFs and others	Breast	SRX11005607, SRX11005608, SRX11005609, SRX11005610, SRX11005611, SRX11005612, SRX8080566, SRX8080567, SRX8080568, SRX8080569, SRX8080570, SRX8080571
TAZ	TFs and others	Breast	SRX21286682, SRX21286684, SRX21286686, SRX21286688
CTCFL	TFs and others	Breast	SRX1091827, SRX1091828
FOXA2	TFs and others	Breast	SRX484462
DNA-RNA hybrid	TFs and others	Breast	SRX14756932, SRX14756933, SRX14756934, SRX14756935, SRX14756936, SRX14756937, SRX14756938, SRX14756939, SRX14756940, SRX14756941, SRX15232261, SRX15232262, SRX15232263, SRX15232264, SRX15232266, SRX15232267, SRX15232268, SRX15232269, SRX15232270, SRX15232271, SRX15232272, SRX15232273
NFIB	TFs and others	Breast	SRX3322664, SRX3322665, SRX3322692, SRX3322693
H3K4ac	Histone	Breast	SRX1043542, SRX1043543, SRX1043548, SRX1043549, SRX1043554, SRX1043555, SRX3083106, SRX3083111, SRX3083116, SRX3083121, SRX3083126, SRX3083131, SRX3083136, SRX3083141, SRX3083146, SRX3083151, SRX3083156, SRX3083161
NRF1	TFs and others	Breast	SRX1280448, SRX1280449, SRX1280451, SRX1280452, SRX2423551, SRX2423552, SRX666559
KMT2D	TFs and others	Breast	SRX15826235, SRX15826238, SRX15826241, SRX15826244, SRX2588916, SRX2588918
ZNF217	TFs and others	Breast	SRX150642, SRX3322532, SRX3322533, SRX5457502, SRX5457503
YAP1	TFs and others	Breast	SRX10119363, SRX10119364, SRX10119365, SRX10119366, SRX10119375, SRX10119376, SRX10119387, SRX10119388, SRX10205599, SRX10205600, SRX10205601, SRX10205602, SRX10205607, SRX10205608, SRX10205609, SRX10205610, SRX14255718, SRX14255719, SRX20830482, SRX20830483, SRX20830484, SRX20830485, SRX20830486, SRX20830487, SRX20830488, SRX20830489, SRX3401274, SRX4213898, SRX4213899, SRX5287688, SRX5287689, S…
HDAC1	TFs and others	Breast	SRX10921876, SRX11110957, SRX11110959, SRX5089495, SRX5089496, SRX5089497, SRX5089498, SRX5089499, SRX5089500, SRX5089501, SRX5089502, SRX5089503, SRX5089504, SRX5089505, SRX5089506, SRX5089507, SRX5089508, SRX5089509, SRX5089510, SRX5089511, SRX5089512
PGR	TFs and others	Breast	SRX1012615, SRX1012616, SRX1012617, SRX1012618, SRX1012619, SRX1012620, SRX1012621, SRX1012622, SRX1012623, SRX1012650, SRX1012651, SRX1012652, SRX1012653, SRX1012654, SRX1012655, SRX1012656, SRX1012657, SRX1012658, SRX1012659, SRX1012660, SRX1012690, SRX1012691, SRX1012692, SRX1012693, SRX1012694, SRX1012695, SRX1012696, SRX1012697, SRX1012698, SRX1012699, SRX1012700, SRX1012701, SRX1012711, SRX…
E4F1	TFs and others	Breast	SRX5457431, SRX5457432, SRX5503017, SRX5503019, SRX5503021, SRX5503023
RAD21	TFs and others	Breast	DRX013211, SRX11120882, SRX11120883, SRX11120884, SRX1165105, SRX1165106, SRX1165107, SRX190247, SRX2636200, SRX2636201, SRX3800728, SRX3800729, SRX3800730, SRX3800731, SRX3800732, SRX3800733, SRX4792907, SRX4792908, SRX4792909, SRX4792910, SRX4792911, SRX4792912, SRX6058763, SRX6058764, SRX6058765, SRX6058766, SRX6712618, SRX6828396, SRX6828397
HDAC6	TFs and others	Breast	SRX9932062, SRX9932063, SRX9932064, SRX9932065, SRX9932066, SRX9932067, SRX9932068, SRX9932069, SRX9932070, SRX9932071, SRX9932072, SRX9932073, SRX9932074, SRX9932075, SRX9932076, SRX9932077
YY1	TFs and others	Breast	SRX10773103, SRX10773104, SRX10773105, SRX10773106, SRX10773107, SRX10773108
CREBBP	TFs and others	Breast	SRX100258, SRX100259, SRX100261, SRX100262, SRX100263, SRX100264, SRX11120869, SRX11120870, SRX11120900, SRX11120901, SRX6712568, SRX6712569
STAG1	TFs and others	Breast	SRX15929727, SRX15929729, SRX15929734, SRX15929735, SRX15929736, SRX18013265, SRX18013267, SRX3040147, SRX3040151, SRX3589917, SRX3589918, SRX3589921, SRX3589922, SRX3589925, SRX3589926
SREBF2	TFs and others	Breast	SRX5359048, SRX5359049
H3R26cit	Histone	Breast	SRX564189, SRX564190, SRX564191, SRX564192, SRX564193, SRX564194, SRX564201, SRX564202
SOX9	TFs and others	Breast	SRX13867212, SRX13867213, SRX13867216, SRX13867217
ARID2	TFs and others	Breast	SRX10859402, SRX10859403, SRX5089531, SRX5089532, SRX5089533, SRX5089534, SRX5089535, SRX5089536, SRX5089537, SRX5089538, SRX5089539, SRX5089540, SRX5089541, SRX5089542, SRX5089543, SRX5089544, SRX5089545, SRX5089546, SRX5089547, SRX5089549
DPF2	TFs and others	Breast	SRX2423667, SRX2423668
BMI1	TFs and others	Breast	SRX3322868, SRX3322869
CDKN1B	TFs and others	Breast	SRX3857000, SRX3857001, SRX3857002, SRX3857003, SRX3857004, SRX3857005, SRX3857006, SRX3857007
H4K8ac	Histone	Breast	SRX14372505, SRX14372506, SRX14372509, SRX14372510, SRX14372513, SRX14372514, SRX1998168, SRX1998171, SRX1998174, SRX1998177, SRX1998180, SRX1998183, SRX1998186, SRX1998189, SRX1998192, SRX1998195, SRX1998198, SRX1998201, SRX1998204, SRX6443432
ZNF687	TFs and others	Breast	SRX2424597, SRX2424598
H4K4me3	Histone	Breast	SRX469107, SRX469108
HCFC1	TFs and others	Breast	SRX2424330, SRX2424331
NR2F2	TFs and others	Breast	SRX18191640, SRX18191641, SRX18191650, SRX18191651, SRX190293, SRX194577, SRX6027752, SRX6027754, SRX7624146, SRX7624147, SRX7624159, SRX7624160
SFPQ	TFs and others	Breast	SRX593748, SRX593750
VGLL1	TFs and others	Breast	SRX18013277, SRX18013278, SRX18013279
H3K9ac	Histone	Breast	SRX038576, SRX038577, SRX038743, SRX038744, SRX067464, SRX13310317, SRX13310320, SRX13310323, SRX13310326, SRX17989919, SRX17989920, SRX17989921, SRX17989922, SRX1997943, SRX1997944, SRX1997961, SRX1997962, SRX1997979, SRX1997980, SRX1997997, SRX1997998, SRX1998015, SRX1998016, SRX1998034, SRX1998035, SRX1998052, SRX1998053, SRX1998070, SRX1998071, SRX1998088, SRX1998089, SRX1998106, SRX1998107, …
RORC	TFs and others	Breast	SRX5359052, SRX5359053
FOSL1	TFs and others	Breast	SRX2585779, SRX268298, SRX3923184, SRX5954736
MEN1	TFs and others	Breast	SRX15216102, SRX15216103, SRX15216104, SRX15216105, SRX2007813, SRX2007815, SRX2513056, SRX2513057
WDR77	TFs and others	Breast	SRX13991437, SRX13991438, SRX13991439, SRX13991440
ESRRA	TFs and others	Breast	SRX1473609, SRX1473610, SRX2424664, SRX2424665, SRX5457448, SRX5457449, SRX9683970, SRX9683971
ZNF574	TFs and others	Breast	SRX5457521, SRX5457522
HEXIM1	TFs and others	Breast	SRX12813811, SRX12813812, SRX7030912, SRX7030913
TRIM22	TFs and others	Breast	SRX5457473, SRX5457474
ZMYND8	TFs and others	Breast	SRX1117696, SRX12771704, SRX12771705, SRX1521297, SRX1521305, SRX15279659, SRX15279660, SRX3583257, SRX3583258, SRX7366777, SRX7366778
8-Hydroxydeoxyguanosine	TFs and others	Breast	SRX13840520, SRX13840522, SRX13840523, SRX2935292, SRX2935293, SRX6895232, SRX6895233, SRX6895234
REST	TFs and others	Breast	SRX190347
ATAC-Seq	ATAC-Seq	Breast	DRX181719, DRX181720, DRX181721, DRX181722, DRX277880, DRX277881, DRX277882, DRX277883, DRX277884, DRX277885, DRX277886, DRX277887, DRX277888, DRX277889, DRX277890, DRX277891, DRX277892, DRX277893, DRX277894, DRX277895, DRX277896, DRX277897, DRX277898, DRX277899, DRX277900, DRX277901, DRX277902, DRX277903, DRX277904, DRX277905, DRX277906, DRX277907, DRX277908, DRX277909, DRX277910, DRX277911, DRX…
JUND	TFs and others	Breast	SRX190174, SRX190348
FOSL2	TFs and others	Breast	SRX190224, SRX3322568, SRX3322569, SRX5954737, SRX9046258, SRX9046259
MTA1	TFs and others	Breast	SRX15574112, SRX2423813, SRX2423814, SRX5513515, SRX5513520
MAX	TFs and others	Breast	SRX1757996, SRX1757997, SRX190319, SRX19662630, SRX19662631, SRX5432861
MAFB	TFs and others	Breast	SRX13991433, SRX13991434, SRX13991435, SRX13991436
SMARCE1	TFs and others	Breast	SRX10859415, SRX10859416, SRX2662143, SRX2662146, SRX3322338, SRX3322339
KDM4C	TFs and others	Breast	SRX7030924, SRX7030925, SRX7030926, SRX7030927
TAF1	TFs and others	Breast	SRX11120885, SRX11120886, SRX190267, SRX19662637, SRX19662638
KLF9	TFs and others	Breast	SRX3321962, SRX3321963
DNMT3B	TFs and others	Breast	SRX11005599, SRX11005600, SRX11005601, SRX11005602, SRX11005603, SRX11005604
PRRX1	TFs and others	Breast	SRX15235713, SRX15235714, SRX15235717, SRX15235718, SRX15235728, SRX15235729, SRX15235732, SRX15235733, SRX15235736, SRX15235737
SMARCB1	TFs and others	Breast	SRX5089426, SRX5089427, SRX5089428, SRX5089429, SRX5089430, SRX5089431, SRX5089432, SRX5089433, SRX5089434, SRX5089435, SRX5089436, SRX5089437, SRX5089438, SRX5089439, SRX5089440, SRX5089441, SRX5089443, SRX5089444
H1.4S187ph	Histone	Breast	SRX6874443, SRX6874444, SRX6874446, SRX6874451, SRX6874452, SRX6874453
CTBP1	TFs and others	Breast	SRX130108, SRX2424235, SRX2424236
CLOCK	TFs and others	Breast	SRX5457295, SRX5457296, SRX5457524, SRX5457525
CEBPA	TFs and others	Breast	SRX6058754, SRX6058755, SRX6058757, SRX6058758
SMARCA4	TFs and others	Breast	SRX10205611, SRX10205612, SRX10205613, SRX10205614, SRX10205615, SRX10205616, SRX10859410, SRX10859412, SRX1156534, SRX1156535, SRX1156536, SRX1156537, SRX1156538, SRX1156539, SRX1156540, SRX1156541, SRX1156542, SRX11650838, SRX11650839, SRX11650840, SRX11650841, SRX11650842, SRX11650843, SRX1936520, SRX1936521, SRX5089407, SRX5089408, SRX5089409, SRX5089410, SRX5089411, SRX5089412, SRX5089413, S…
HIF1A	TFs and others	Breast	DRX447878, DRX447879, SRX13993201, SRX13993204, SRX14746765, SRX14746766, SRX3583255, SRX3583256, SRX666556
MED12	TFs and others	Breast	SRX1212811, SRX278610, SRX3011700, SRX3011701, SRX3011702, SRX3011703, SRX5185602, SRX5185603, SRX5185604, SRX5185605
H3K9K14ac	Histone	Breast	SRX7030902, SRX7030903, SRX7030904, SRX7030905, SRX7367729, SRX7367730, SRX7367743, SRX7367744, SRX7367757, SRX7367758
H3K9me2	Histone	Breast	SRX1426071, SRX1426076, SRX20437776, SRX20437777, SRX2213515, SRX2213516, SRX2213523, SRX2213524, SRX2635845, SRX2635846, SRX4922855, SRX4922856, SRX4922857, SRX4922858, SRX4922859, SRX4922860, SRX518257, SRX818555, SRX818559, SRX818563, SRX818567, SRX818571, SRX818572, SRX818573, SRX818574, SRX891830, SRX891831, SRX891832, SRX891833
JUN	TFs and others	Breast	SRX039141, SRX039142, SRX10306474, SRX10306478, SRX10306484, SRX1044411, SRX1044412, SRX1044413, SRX1142761, SRX1142763, SRX14612962, SRX14612963, SRX14612964, SRX14612980, SRX14612984, SRX14612985, SRX14612997, SRX14612998, SRX14613009, SRX14613015, SRX18014930, SRX18014931, SRX19662626, SRX19662627, SRX2423570, SRX2423571, SRX268299, SRX3080209, SRX3080210, SRX3080211, SRX3856992, SRX3856993, S…
KDM1A	TFs and others	Breast	SRX10306462, SRX10306465, SRX10306475, SRX10306483, SRX10579965, SRX10637290, SRX10637291, SRX14613000, SRX16341656, SRX16341657, SRX16341658, SRX19662628, SRX19662629, SRX3265284, SRX3265285, SRX3265286, SRX3833324, SRX3833328, SRX822011, SRX822012
ZEB1	TFs and others	Breast	SRX13298923, SRX13298924, SRX13298925
TCF7	TFs and others	Breast	SRX10773082, SRX10773083, SRX10773084, SRX10773085, SRX4017892, SRX5794309, SRX5794310, SRX5794311, SRX5794312, SRX5794313, SRX5794314
HSF1	TFs and others	Breast	SRX13845683, SRX13845684, SRX13845688, SRX13845689, SRX13845693, SRX13845694, SRX155715, SRX155717, SRX155719, SRX155721, SRX155723, SRX155725, SRX155727, SRX155728, SRX155730, SRX155731, SRX155736, SRX155737, SRX155748, SRX155749, SRX155754, SRX155755, SRX155760, SRX155761, SRX155763, SRX155764, SRX155766, SRX155767, SRX155769, SRX155770, SRX16646093, SRX16646094, SRX16646095, SRX16646113, SRX16…
TLE3	TFs and others	Breast	SRX194581, SRX4815191, SRX4815192, SRX4815193, SRX4815194, SRX4815195, SRX4815196
STAT5A	TFs and others	Breast	SRX9932042, SRX9932043, SRX9932044, SRX9932045, SRX9932050, SRX9932051, SRX9932052, SRX9932053, SRX9932054, SRX9932055, SRX9932056, SRX9932057, SRX9932058, SRX9932059, SRX9932060, SRX9932061
SATB1	TFs and others	Breast	SRX5089783, SRX5089784, SRX5089785, SRX5089786
HDAC2	TFs and others	Breast	SRX190281, SRX4909431, SRX4909432
ZFX	TFs and others	Breast	SRX3091902, SRX3091903, SRX3322358, SRX3322359
RARA	TFs and others	Breast	SRX19662634, SRX19662636, SRX4671297, SRX4671298, SRX4671299, SRX4671312, SRX4671313, SRX4671314
CDYL2	TFs and others	Breast	SRX8321653, SRX8321655
H3	Histone	Breast	SRX17989923, SRX17989924, SRX17989925, SRX17989926, SRX2631630, SRX329008, SRX3583261, SRX3583262, SRX387607, SRX387610, SRX387614, SRX518248, SRX518255, SRX634883, SRX634889, SRX647708, SRX647709, SRX6957866, SRX6957867, SRX6957871, SRX6957872, SRX7367731, SRX7367745, SRX7367759
TFAP2C	TFs and others	Breast	SRX018833, SRX028632, SRX028633, SRX11858167, SRX11858168, SRX128099, SRX128100, SRX128101, SRX128102, SRX4417026, SRX4417027, SRX5405696, SRX5405697, SRX673727, SRX673728
EGR1	TFs and others	Breast	SRX190300
CDK9	TFs and others	Breast	SRX4023329, SRX4023330, SRX7366779, SRX7366780, SRX7366781, SRX7366782, SRX7366783, SRX7366784
CREB1	TFs and others	Breast	SRX3322304, SRX3322305, SRX3323089, SRX3323090, SRX3554406, SRX3554407, SRX3554408, SRX3554409, SRX3554410, SRX3554411
BRD7	TFs and others	Breast	SRX5824549, SRX5824550, SRX5824551, SRX5824554, SRX5824555, SRX5824556, SRX5824557
5-hmC	TFs and others	Breast	SRX19636322, SRX19636323, SRX2000341, SRX2000344
H2BK12ac	Histone	Breast	SRX11504467, SRX11504470, SRX11504471, SRX11504473, SRX11504474, SRX11504476, SRX11504477, SRX11504478, SRX11504479, SRX11504481, SRX11504482, SRX11504484
RXRA	TFs and others	Breast	SRX194580, SRX4671294, SRX4671295, SRX4671296, SRX4671309, SRX4671310, SRX4671311
RUNX2	TFs and others	Breast	SRX2145568, SRX2145569
H3K18ac	Histone	Breast	SRX100268, SRX100269, SRX4714475, SRX4714476
SMAD3	TFs and others	Breast	SRX18014928, SRX18014929, SRX2425860, SRX2425862, SRX5757564, SRX5757566, SRX5757568, SRX5757570
ZNF24	TFs and others	Breast	SRX3322311, SRX3322312
LIN9	TFs and others	Breast	SRX4213896, SRX4213897
GRHL1	TFs and others	Breast	SRX7122002, SRX7122007
GABPA	TFs and others	Breast	SRX190320, SRX3321934, SRX3321935
NCOA3	TFs and others	Breast	SRX100272, SRX10365545, SRX10365546, SRX10365547, SRX10365548, SRX10365549, SRX10365550, SRX10365551, SRX10365552, SRX3322545, SRX3322546, SRX3322645, SRX3322646, SRX4663588, SRX4663589, SRX4663590, SRX4663591, SRX6831820, SRX6831821, SRX6831822, SRX7657039, SRX7657040, SRX7657041, SRX7657042, SRX7657043, SRX7657044, SRX7657045, SRX7657046, SRX7657047, SRX7657048, SRX7657049, SRX7657050, SRX89492…
SRF	TFs and others	Breast	SRX190295
AGO1	TFs and others	Breast	SRX518249, SRX518256, SRX518263, SRX518264, SRX8716242, SRX8716243, SRX8716244, SRX8716245
H3K4me1	Histone	Breast	DRX013213, SRX038570, SRX038571, SRX038739, SRX038740, SRX039143, SRX039144, SRX061987, SRX067456, SRX10579963, SRX1117699, SRX1117700, SRX1156493, SRX1156494, SRX1156495, SRX1156496, SRX1156497, SRX1156498, SRX14138488, SRX1521298, SRX1521300, SRX1521306, SRX1521311, SRX1527003, SRX1527004, SRX1527005, SRX153145, SRX15826250, SRX15826251, SRX15826258, SRX15826259, SRX1594197, SRX1594198, SRX1594…
H2A.ZK4K7K11ac	Histone	Breast	SRX2513506, SRX2513507, SRX2513508, SRX2513509, SRX2513510, SRX2513511, SRX2513512, SRX2513513, SRX2513514, SRX2513515, SRX3677675, SRX3677676, SRX4564966, SRX4564967, SRX4564968, SRX471216
EZH2	TFs and others	Breast	SRX12019746, SRX14960537, SRX14960538, SRX14960539, SRX14960540, SRX186697, SRX19210517, SRX19210539, SRX19210542, SRX19210543, SRX19210556, SRX19210557, SRX2585783, SRX3010034, SRX3010035, SRX3010234, SRX3010235, SRX5513514, SRX5513519, SRX6750795, SRX6750796
CTCF	TFs and others	Breast	DRX013210, SRX038562, SRX038563, SRX067475, SRX080328, SRX080338, SRX080416, SRX099863, SRX099864, SRX100393, SRX10142196, SRX10142197, SRX10142198, SRX10142199, SRX10142200, SRX10142201, SRX10142202, SRX10142203, SRX10142204, SRX10142205, SRX103004, SRX103007, SRX103008, SRX10773097, SRX10773098, SRX10773099, SRX10773100, SRX10773101, SRX10773102, SRX1091824, SRX1091825, SRX1091826, SRX11120873,…
NOTCH1	TFs and others	Breast	SRX4374897, SRX4374898, SRX4374899, SRX4374900, SRX4374935, SRX4374936, SRX4374937, SRX4374938
GATAD2B	TFs and others	Breast	SRX2424030, SRX2424031, SRX3322944, SRX3322945, SRX4096865, SRX4096866, SRX4096867, SRX4096868, SRX4096869, SRX4096870, SRX4096871, SRX4096872
BRD9	TFs and others	Breast	SRX4377560, SRX4377561, SRX4377562, SRX4377563
H3K122ac	Histone	Breast	SRX283648, SRX3080263, SRX3080264, SRX3080267, SRX3080268, SRX3080271, SRX3080272, SRX7030884, SRX7030885, SRX7367726, SRX7367727, SRX7367728, SRX7367740, SRX7367741, SRX7367742, SRX7367754, SRX7367755, SRX7367756
SAP30	TFs and others	Breast	SRX17989897, SRX17989898
MNT	TFs and others	Breast	SRX2424317, SRX2424318, SRX3322528, SRX3322529
H2A.X	Histone	Breast	SRX14733322, SRX14733323, SRX14733328, SRX14733329, SRX14733332, SRX14733333, SRX14733334, SRX14733335
BRCA1	TFs and others	Breast	SRX182682, SRX481566
POLR2C	TFs and others	Breast	SRX7692442, SRX7692443, SRX7692444, SRX7692445, SRX7692446, SRX7692447

## Sheet: Cardiovascular
Antigen	Antigen class	Cell type class	Accession ID
FOS	TFs and others	Cardiovascular	SRX070878, SRX070879, SRX150664
TP53	TFs and others	Cardiovascular	SRX7088113, SRX7088114, SRX7088115, SRX7088116
TCF21	TFs and others	Cardiovascular	DRX190655, DRX190656, SRX5146789, SRX5904135, SRX699732, SRX699733, SRX699734, SRX699735, SRX7299332, SRX8358264
STAG2	TFs and others	Cardiovascular	SRX3040157
TEAD1	TFs and others	Cardiovascular	SRX14688734
H3K9me3	Histone	Cardiovascular	SRX10187512, SRX10187513, SRX10187517, SRX10187518, SRX10187711, SRX10187712, SRX10187721, SRX10187722, SRX10977229, SRX10977230, SRX10977231, SRX10977232, SRX11159956, SRX11159957, SRX13006363, SRX13006364, SRX13006493, SRX13006494, SRX13007128, SRX13007130, SRX13007800, SRX13007801, SRX13007811, SRX13007812, SRX13008068, SRX13008069, SRX13008410, SRX13008411, SRX13008897, SRX13008898, SRX130090…
E2F1	TFs and others	Cardiovascular	SRX1548204, SRX1548205, SRX1548206, SRX1548207, SRX1548208, SRX1548209
FOXO1	TFs and others	Cardiovascular	SRX5548891, SRX5548892
SIN3A	TFs and others	Cardiovascular	SRX3144856, SRX3144857
H3K14ac	Histone	Cardiovascular	SRX9472216, SRX9472217, SRX9472218
RNA polymerase II	RNA polymerase	Cardiovascular	SRX067500, SRX080152, SRX080153, SRX099630, SRX103005, SRX112013, SRX112014, SRX150473, SRX190280, SRX190286, SRX2452433, SRX2452434, SRX2452436, SRX2452437, SRX2671793, SRX2671800, SRX2671835, SRX2671842, SRX3322308, SRX3322607, SRX338786, SRX338787, SRX338788, SRX338789, SRX346933, SRX346934, SRX346935, SRX346936, SRX3599288, SRX3599289, SRX3599290, SRX3599291, SRX367016, SRX367017, SRX367018, …
H2A.Z	Histone	Cardiovascular	SRX186752
RBPJ	TFs and others	Cardiovascular	SRX2207670, SRX3599308, SRX3599309, SRX3599310, SRX3599311
NFE2L2	TFs and others	Cardiovascular	SRX2355075, SRX2355076, SRX2734392, SRX2734393, SRX2734394
H3K4me2	Histone	Cardiovascular	SRX038612, SRX038613, SRX067434, SRX2355068, SRX2355069, SRX2452439, SRX3599272, SRX3599273, SRX3599274, SRX3599275
JUNB	TFs and others	Cardiovascular	SRX2355074
H3K27ac	Histone	Cardiovascular	SRX038604, SRX038605, SRX067442, SRX100255, SRX10187573, SRX10187574, SRX10187584, SRX10187585, SRX10187639, SRX10187640, SRX10187695, SRX10187696, SRX10187770, SRX10187771, SRX10341645, SRX10341646, SRX10341647, SRX10341648, SRX10341649, SRX10341650, SRX10976523, SRX10976524, SRX10976525, SRX10976526, SRX11023669, SRX11023675, SRX11169134, SRX11169135, SRX11515979, SRX11515987, SRX1235302, SRX12…
RELA	TFs and others	Cardiovascular	SRX112015, SRX112016, SRX2207671, SRX2207672, SRX2207673, SRX2355077, SRX2355078, SRX2355079, SRX2355081, SRX2355083, SRX2355085, SRX294971, SRX367012, SRX367013, SRX367014, SRX367015, SRX425262, SRX425263, SRX425264, SRX4947719, SRX4947720, SRX4947721, SRX7054609, SRX7054610, SRX7054611, SRX7054612, SRX7054613, SRX7054614, SRX7054615, SRX7054616, SRX7054617, SRX7054618, SRX7054619, SRX7054620, S…
BRD4	TFs and others	Cardiovascular	SRX2452425, SRX2452426, SRX425253, SRX425254, SRX425255
Epitope tags	TFs and others	Cardiovascular	SRX096360, SRX096362, SRX1116228, SRX1116229, SRX1116234, SRX1116235, SRX4947685, SRX4947686, SRX4947687, SRX4947688, SRX4947691, SRX4947692, SRX4947693, SRX4947694, SRX8030141, SRX8030142
FOXC2	TFs and others	Cardiovascular	SRX5667819
ERG	TFs and others	Cardiovascular	SRX2355058, SRX2355059, SRX2734391, SRX3599296, SRX3599297, SRX3599298, SRX3599299, SRX3601957, SRX3601958, SRX5236332, SRX5527654, SRX5527655, SRX5527658, SRX5527659, SRX7054931, SRX7054932, SRX7054933, SRX7054934, SRX7054935, SRX7054936, SRX7054937, SRX7054938, SRX7054939, SRX7054940, SRX7054941, SRX7054942, SRX7054943, SRX7054944, SRX7054993, SRX7054994, SRX7054995, SRX7054996, SRX7054997, SRX…
H3K27me3	Histone	Cardiovascular	SRX038606, SRX038607, SRX067439, SRX10187487, SRX10187488, SRX10187742, SRX10977266, SRX10977267, SRX10977268, SRX10977269, SRX11166816, SRX11166817, SRX11515982, SRX11515990, SRX13005666, SRX13005668, SRX13006435, SRX13006436, SRX13006780, SRX13006781, SRX13007616, SRX13007617, SRX13007636, SRX13007637, SRX13007820, SRX13007821, SRX13008216, SRX13008217, SRX13008377, SRX13008378, SRX13008422, SR…
H3K4me3	Histone	Cardiovascular	SRX038614, SRX038615, SRX067424, SRX10187494, SRX10187495, SRX10187680, SRX10187681, SRX10187690, SRX10187691, SRX10187713, SRX10187714, SRX10187719, SRX10187720, SRX10976801, SRX10976802, SRX10976803, SRX10976804, SRX11165495, SRX11165496, SRX13005539, SRX13005540, SRX13006270, SRX13006271, SRX13006281, SRX13006282, SRX13006604, SRX13006605, SRX13007876, SRX13007877, SRX13007944, SRX13007945, SR…
SMC1A	TFs and others	Cardiovascular	SRX3040158
H3K36me3	Histone	Cardiovascular	SRX038608, SRX038609, SRX067508, SRX10187500, SRX10187501, SRX10187556, SRX10187557, SRX10187560, SRX10187561, SRX10187566, SRX10187567, SRX10187577, SRX10187578, SRX10187675, SRX10187676, SRX10187816, SRX10187817, SRX10977152, SRX10977153, SRX10977154, SRX10977155, SRX11167953, SRX11167954, SRX13005482, SRX13005484, SRX13006447, SRX13006448, SRX13006591, SRX13006592, SRX13007808, SRX13007809, SR…
EP300	TFs and others	Cardiovascular	SRX099628, SRX099629, SRX1116231, SRX1116232, SRX189720, SRX189721, SRX189722, SRX189723, SRX189724, SRX189725, SRX189726, SRX189727, SRX2343934, SRX2343935, SRX2343936, SRX2343937, SRX2671792, SRX2671799, SRX2671836, SRX3599316, SRX3599317, SRX3599318, SRX3599319, SRX5527607, SRX5527609, SRX5527615, SRX5527617
ETS1	TFs and others	Cardiovascular	SRX189740, SRX189741, SRX189742, SRX189743, SRX2452427, SRX2452428, SRX2452429, SRX2452430, SRX2452431, SRX2452432, SRX3599292, SRX3599293, SRX3599294, SRX3599295
H3K79me2	Histone	Cardiovascular	SRX186751
FLI1	TFs and others	Cardiovascular	SRX3599300, SRX3599301, SRX3599302, SRX3599303, SRX3601959, SRX3601960
MED1	TFs and others	Cardiovascular	SRX5236336, SRX5236337
MYC	TFs and others	Cardiovascular	SRX080151, SRX102997, SRX2452447
H3ac	Histone	Cardiovascular	SRX469904, SRX469905, SRX469906, SRX469907, SRX469908, SRX469909
TAZ	TFs and others	Cardiovascular	SRX9699943
YAP1	TFs and others	Cardiovascular	SRX2558410, SRX2558412, SRX7826472, SRX7826475, SRX9699942
RAD21	TFs and others	Cardiovascular	SRX2559011, SRX2559012, SRX2559013, SRX2559014
STAG1	TFs and others	Cardiovascular	SRX3040156
H3K9ac	Histone	Cardiovascular	SRX038616, SRX038617, SRX067486, SRX1116208, SRX1116209, SRX1116210, SRX1116213, SRX1116214, SRX1116215, SRX1116216, SRX1116217, SRX1116218, SRX11515978, SRX11515986, SRX8631021, SRX8631026, SRX9724156, SRX9724157, SRX9724158, SRX9724159
PPARG	TFs and others	Cardiovascular	SRX338782, SRX338783, SRX338784, SRX338785, SRX346929, SRX346930, SRX346931, SRX346932
ATAC-Seq	ATAC-Seq	Cardiovascular	ERX2676945, ERX2676946, ERX2676947, ERX2676948, ERX2676949, ERX2676950, ERX2676951, ERX2676952, ERX2676953, ERX2676954, ERX3308140, ERX3308141, ERX3308146, ERX3308147, SRX10157976, SRX10157977, SRX10474913, SRX10474914, SRX10474968, SRX10474969, SRX10475007, SRX10475008, SRX10475326, SRX10475327, SRX10475358, SRX10475359, SRX10475456, SRX10475457, SRX10475695, SRX10475696, SRX10475836, SRX1047583…
JUND	TFs and others	Cardiovascular	SRX699738
MAX	TFs and others	Cardiovascular	SRX150651
ATF3	TFs and others	Cardiovascular	SRX13830809, SRX13830811, SRX13830812, SRX13830814, SRX13830815, SRX13830817, SRX13830818, SRX13830820, SRX13830821, SRX13830823, SRX13830824, SRX13830826
PROX1	TFs and others	Cardiovascular	SRX1116230, SRX1116233, SRX5667817
SMARCA4	TFs and others	Cardiovascular	SRX11515984, SRX11515992, SRX4734146, SRX4734150, SRX4734152, SRX8588623, SRX8588624, SRX8588625, SRX8588626, SRX8631024, SRX8631029
HIF1A	TFs and others	Cardiovascular	SRX157607, SRX157608, SRX2346891, SRX4741788, SRX4741791
KLF4	TFs and others	Cardiovascular	SRX8588639, SRX8588640, SRX8588641, SRX8588642
H3K9K14ac	Histone	Cardiovascular	SRX062420, SRX062421, SRX062422, SRX062423, SRX062424, SRX062425, SRX143109, SRX143112, SRX143115, SRX143118, SRX143121, SRX143124
ELK3	TFs and others	Cardiovascular	SRX670629
H3K9me2	Histone	Cardiovascular	SRX11515981, SRX11515989, SRX19050330, SRX19050331, SRX19050332, SRX19050333, SRX4947697, SRX4947698, SRX4947705, SRX4947706
IRF1	TFs and others	Cardiovascular	SRX2355070, SRX2355071
JUN	TFs and others	Cardiovascular	SRX150358, SRX2355072, SRX2355073, SRX3599304, SRX3599305, SRX3599306, SRX3599307, SRX699737
KDM1A	TFs and others	Cardiovascular	SRX13273914, SRX13273917, SRX13273920
CEBPD	TFs and others	Cardiovascular	SRX2355057
SMAD2	TFs and others	Cardiovascular	SRX3847778, SRX3847781, SRX6476489, SRX6476492, SRX6476497, SRX6476500
NFATC1	TFs and others	Cardiovascular	SRX335070, SRX335071, SRX5667818
GATA2	TFs and others	Cardiovascular	SRX070876, SRX070877, SRX150427, SRX3599312, SRX3599313, SRX3599314, SRX3599315
TFEB	TFs and others	Cardiovascular	SRX2250891, SRX6860609
HMGB1	TFs and others	Cardiovascular	SRX10567335, SRX2765964
CHD6	TFs and others	Cardiovascular	SRX6969884, SRX6969885
H3K4me1	Histone	Cardiovascular	SRX038610, SRX038611, SRX067441, SRX10187473, SRX10187474, SRX10187527, SRX10187528, SRX10187538, SRX10187539, SRX10187635, SRX10187636, SRX10187781, SRX10187782, SRX10977225, SRX10977226, SRX10977227, SRX10977228, SRX11165970, SRX11165971, SRX13005563, SRX13005564, SRX13006606, SRX13006607, SRX13007599, SRX13007600, SRX13007625, SRX13007626, SRX13007659, SRX13007660, SRX13007661, SRX13007662, SR…
EZH2	TFs and others	Cardiovascular	SRX186714, SRX3599320, SRX3599321, SRX3599322, SRX3599323
TAL1	TFs and others	Cardiovascular	SRX244128, SRX393516, SRX393518
LMNA	TFs and others	Cardiovascular	SRX4797395, SRX4797397, SRX4797399, SRX4797401, SRX4797403, SRX4797405, SRX4797407, SRX4797409, SRX4797411, SRX4797413
CTCF	TFs and others	Cardiovascular	SRX031246, SRX038602, SRX038603, SRX067467, SRX080329, SRX080337, SRX080344, SRX080373, SRX080395, SRX080399, SRX080406, SRX080412, SRX080414, SRX102980, SRX10475435, SRX10475436, SRX10476797, SRX10476798, SRX10478144, SRX10478145, SRX10976184, SRX10976185, SRX10976744, SRX10976745, SRX10976905, SRX10976906, SRX10977387, SRX10977388, SRX13005477, SRX13005478, SRX13006678, SRX13006679, SRX13006718…
NOTCH1	TFs and others	Cardiovascular	SRX2207669, SRX2343922, SRX2343923, SRX2343924, SRX2343925, SRX285599
H2A.X	Histone	Cardiovascular	SRX12905289, SRX12905290

## Sheet: Epidermis
Antigen	Antigen class	Cell type class	Accession ID
FOS	TFs and others	Epidermis	SRX9350645
TP53	TFs and others	Epidermis	SRX017559, SRX017560, SRX131373, SRX1547996, SRX1547998, SRX2940747, SRX2940751, SRX2940752, SRX2940756, SRX2940757, SRX2940759, SRX3734300, SRX3734301, SRX4649679, SRX4649681, SRX483585, SRX483591, SRX490263, SRX490264, SRX514840, SRX514841, SRX514842, SRX514846, SRX514847, SRX514848
NUP98	TFs and others	Epidermis	SRX18517800, SRX18517801, SRX18517819, SRX18517820, SRX18517821, SRX20419392, SRX20440536, SRX8363960
STAG2	TFs and others	Epidermis	SRX12669719, SRX12669720, SRX8999059, SRX8999060
SS18	TFs and others	Epidermis	SRX10640840, SRX10640841, SRX10640842, SRX10640843, SRX10640868, SRX10640869, SRX10640870, SRX10640871
TFAP2A	TFs and others	Epidermis	SRX9607922, SRX9607923, SRX9607924
TEAD1	TFs and others	Epidermis	SRX10634384, SRX6976722, SRX6976723
TEAD4	TFs and others	Epidermis	SRX10640860, SRX10640861, SRX10640862, SRX10640863, SRX3367142, SRX4074764, SRX5001377, SRX5879970, SRX5879971
H3K9me3	Histone	Epidermis	SRX11165549, SRX11165550, SRX11165551, SRX11165552, SRX148010, SRX148011, SRX186724, SRX186749, SRX2173000, SRX2173001, SRX2173002, SRX2173003, SRX2173006, SRX2173007, SRX3010117, SRX3630750, SRX3630751, SRX3630752, SRX3630753, SRX5766154, SRX5766155, SRX5766156, SRX5766157, SRX641895, SRX641931, SRX6421791, SRX6421794, SRX6421799, SRX6421812, SRX6421821, SRX6421825, SRX6421830, SRX6421840, SRX64…
SP1	TFs and others	Epidermis	SRX10913936, SRX10913937, SRX10913942, SRX10913943, SRX10913948, SRX10913949
ERCC6	TFs and others	Epidermis	SRX2207925, SRX2207926
RNA polymerase II	RNA polymerase	Epidermis	SRX067422, SRX080162, SRX10229518, SRX10229520, SRX1184125, SRX1184131, SRX1184137, SRX12567765, SRX12567767, SRX12567768, SRX12567769, SRX12567771, SRX12567774, SRX12567775, SRX12567776, SRX12567777, SRX13601006, SRX1471742, SRX1471743, SRX15426929, SRX15426930, SRX15426931, SRX15426932, SRX15426933, SRX15426934, SRX15426935, SRX15426936, SRX15426937, SRX15426938, SRX15426939, SRX15426940, SRX15…
ELK1	TFs and others	Epidermis	SRX4637892, SRX4637894
H2A.Z	Histone	Epidermis	SRX186684, SRX186701, SRX2635847, SRX2635848
ZNF750	TFs and others	Epidermis	SRX543180
RBPJ	TFs and others	Epidermis	SRX3100755, SRX666592, SRX666593
ERCC8	TFs and others	Epidermis	SRX2207929, SRX2207930
RNF2	TFs and others	Epidermis	SRX382353, SRX382354, SRX396584
RCOR1	TFs and others	Epidermis	SRX543182
H3K4me2	Histone	Epidermis	SRX038654, SRX038655, SRX067437, SRX067504, SRX2368882, SRX2368883, SRX2896726, SRX3010301, SRX3644359, SRX3644360, SRX3734302, SRX3734306, SRX6384913, SRX6384914, SRX6384915, SRX6384916, SRX641888, SRX641924
AR	TFs and others	Epidermis	SRX20415423, SRX20415425, SRX20415427, SRX3421794, SRX4287638, SRX4287639
H3K27ac	Histone	Epidermis	DRX230605, DRX230606, DRX444243, DRX444244, DRX444245, DRX444246, DRX444247, DRX444248, SRX038646, SRX038647, SRX067413, SRX067425, SRX1003175, SRX1003176, SRX1008496, SRX10187471, SRX10187477, SRX10187478, SRX10187480, SRX10187520, SRX10187525, SRX10187620, SRX10187628, SRX10187649, SRX10187652, SRX10187653, SRX10187655, SRX10187666, SRX10187677, SRX10187718, SRX10187746, SRX10187747, SRX1018774…
BRD4	TFs and others	Epidermis	SRX11969040, SRX11969041, SRX11969042, SRX11969043, SRX11969044, SRX11969045, SRX11969046, SRX11969047, SRX1471738, SRX1471739, SRX2267438, SRX2267439, SRX2267440, SRX2267441, SRX2537517, SRX2537518, SRX2606560, SRX2606563, SRX2606566, SRX2606569, SRX2606572, SRX2606575, SRX264465, SRX264466, SRX3367138, SRX700518, SRX700519, SRX700520, SRX700521, SRX8082232, SRX8082233
Epitope tags	TFs and others	Epidermis	SRX10229517, SRX10229519, SRX1058473, SRX10726614, SRX11051049, SRX11051050, SRX15426922, SRX15426923, SRX15426924, SRX15426925, SRX15426926, SRX15426927, SRX18295232, SRX18543044, SRX18543045, SRX18543046, SRX18543047, SRX18543048, SRX18543049, SRX18543050, SRX18543051, SRX18543052, SRX18543053, SRX18543054, SRX18543055, SRX18543056, SRX18543057, SRX18543058, SRX18543059, SRX18543060, SRX1854306…
H3K27me3	Histone	Epidermis	SRX038648, SRX038649, SRX067452, SRX067496, SRX10020161, SRX10020163, SRX10640853, SRX10640854, SRX10640855, SRX10640856, SRX109441, SRX109444, SRX109447, SRX109450, SRX10976422, SRX10976423, SRX10977183, SRX10977184, SRX10977257, SRX10977258, SRX11033339, SRX11033342, SRX11033345, SRX11033348, SRX1133907, SRX1133908, SRX1184124, SRX1184130, SRX1184136, SRX1295725, SRX1295726, SRX1295727, SRX1295…
H3K4me3	Histone	Epidermis	SRX038656, SRX038657, SRX067401, SRX067471, SRX10001323, SRX10001324, SRX10001325, SRX10001326, SRX10001327, SRX10001328, SRX10001329, SRX10001330, SRX10001331, SRX10001332, SRX10001372, SRX10001373, SRX10001374, SRX10001375, SRX10001376, SRX10001377, SRX10001378, SRX10001379, SRX10001380, SRX10001381, SRX10001382, SRX10001383, SRX1003171, SRX1003172, SRX1008494, SRX1012138, SRX1012141, SRX101214…
SMC1A	TFs and others	Epidermis	SRX12669723, SRX12669724, SRX1967779, SRX1967780, SRX1967781, SRX1967782, SRX1967783, SRX1967784, SRX2014554, SRX20263659, SRX20263660, SRX7805893, SRX7805895, SRX7805897, SRX8999063, SRX8999064
EP400	TFs and others	Epidermis	SRX1058474, SRX1058478
SPI1	TFs and others	Epidermis	SRX13234466, SRX13234469, SRX13356476
H3.3	Histone	Epidermis	SRX2635843, SRX2635844
H3K36me3	Histone	Epidermis	SRX038650, SRX038651, SRX067477, SRX067484, SRX1012139, SRX1012142, SRX1012145, SRX11159860, SRX11159861, SRX11159862, SRX11159863, SRX189957, SRX189990, SRX1916926, SRX1916927, SRX2157056, SRX2157057, SRX2355165, SRX641885, SRX641921, SRX7089285, SRX7089286
PRMT1	TFs and others	Epidermis	SRX3642946, SRX3642947, SRX3642948, SRX3642949
BRD2	TFs and others	Epidermis	SRX2537515, SRX2537516, SRX3367137
GFP	TFs and others	Epidermis	SRX13601007, SRX13601008, SRX13601009, SRX13601010, SRX573177, SRX573180, SRX573183, SRX573186, SRX718424
ASCL1	TFs and others	Epidermis	SRX323565, SRX323567
ETV1	TFs and others	Epidermis	SRX1721488, SRX1721490
SNAI2	TFs and others	Epidermis	SRX476913, SRX476914, SRX476915, SRX476916, SRX476919, SRX476920, SRX476921, SRX476922, SRX476923, SRX476924, SRX476925, SRX476926
TP63	TFs and others	Epidermis	SRX018991, SRX018992, SRX019786, SRX099053, SRX099055, SRX105186, SRX105187, SRX15891786, SRX1603678, SRX20097679, SRX20097680, SRX20097681, SRX20097682, SRX3679906, SRX4976908, SRX4976909, SRX514837, SRX514838, SRX514839, SRX514843, SRX514844, SRX514845, SRX663249, SRX663250, SRX663251, SRX663252, SRX687834, SRX687835, SRX687836, SRX687837, SRX971585, SRX971586
AHR	TFs and others	Epidermis	SRX19495644, SRX19495645
IKZF1	TFs and others	Epidermis	SRX20263661
EN1	TFs and others	Epidermis	SRX10913934, SRX10913935, SRX10913940, SRX10913941, SRX10913946, SRX10913947
KDM6B	TFs and others	Epidermis	SRX490261, SRX490262
H4K20me3	Histone	Epidermis	SRX641901, SRX641937, SRX7556220, SRX7556222, SRX7556223, SRX7556224, SRX7556225, SRX7556226, SRX7556227, SRX7556228, SRX8848983, SRX8849044, SRX8849046, SRX8849047, SRX8849048, SRX8849049, SRX8849050, SRX8849051
H3K56ac	Histone	Epidermis	SRX3103111, SRX3103117
ARNT	TFs and others	Epidermis	SRX6853584, SRX6853585, SRX6853586, SRX6853587
EP300	TFs and others	Epidermis	SRX3322151, SRX3322192, SRX3322802, SRX3322998, SRX971589, SRX971590
H3K79me2	Histone	Epidermis	SRX186723, SRX186750, SRX2256146, SRX2256147, SRX2256148, SRX2256149, SRX2256150, SRX2256151, SRX2636094, SRX2636095, SRX641891, SRX641927, SRX6421795, SRX6421814, SRX6421816, SRX6421823, SRX6421826, SRX6421831, SRX6421842, SRX6421851, SRX6421859, SRX6421878, SRX6421909, SRX6421914, SRX6421922, SRX6421932, SRX6421936, SRX6421941, SRX6421945, SRX6421957, SRX6421964, SRX6421976, SRX6421983, SRX6421…
MED1	TFs and others	Epidermis	SRX1829870, SRX1829874, SRX1829877, SRX1829881, SRX20097685, SRX20097686, SRX2537520, SRX8707938, SRX8707939
DNMT3A	TFs and others	Epidermis	SRX1916933, SRX1916935, SRX1916937, SRX873804, SRX873813
MYC	TFs and others	Epidermis	SRX080161, SRX130063, SRX185776, SRX864094, SRX864095
IRF8	TFs and others	Epidermis	SRX13234467, SRX13234470, SRX13356477
H2A.XS139ph	Histone	Epidermis	SRX6756377, SRX6756378, SRX6756379, SRX6756383, SRX6756384, SRX6756385
H4K20me1	Histone	Epidermis	SRX038660, SRX038661, SRX067479, SRX186682, SRX2636479, SRX2636480, SRX641899, SRX641935
H3K36ac	Histone	Epidermis	SRX641882, SRX641918
CTCFL	TFs and others	Epidermis	SRX1091830, SRX15939516, SRX15939517
FOXA2	TFs and others	Epidermis	SRX2368878, SRX2368879, SRX2368888, SRX2368889, SRX2368898, SRX2368899, SRX2368900, SRX2368901, SRX2431536, SRX2431537, SRX2431540, SRX2431541, SRX2431542, SRX2431543, SRX3644342, SRX3644354, SRX3644355, SRX3644356, SRX3644358
H1	Histone	Epidermis	SRX885220, SRX885221
KMT2D	TFs and others	Epidermis	SRX3679898, SRX3679900, SRX3679902, SRX3679904
KLF3	TFs and others	Epidermis	SRX7214021, SRX7214022
YAP1	TFs and others	Epidermis	SRX10634383, SRX3511907, SRX3511908, SRX3511909, SRX3511910
HDAC1	TFs and others	Epidermis	SRX18517813, SRX18517814, SRX20419390, SRX20419391, SRX20517420, SRX20517422
MKL2	TFs and others	Epidermis	SRX7972421, SRX7972428, SRX7972441, SRX7972442, SRX7972453, SRX7972454, SRX7972455, SRX7972456, SRX7972457, SRX7972458
BATF3	TFs and others	Epidermis	SRX13234468, SRX13234471, SRX13356478
CREBBP	TFs and others	Epidermis	SRX7214024, SRX7214025, SRX7214026, SRX7214027
STAG1	TFs and others	Epidermis	SRX12669717, SRX12669718, SRX8999057, SRX8999058
SREBF2	TFs and others	Epidermis	SRX9101664, SRX9101665, SRX9101666
MYBBP1A	TFs and others	Epidermis	SRX8171743, SRX8171744
ARID2	TFs and others	Epidermis	SRX10640857, SRX10640858, SRX10640859
TBP	TFs and others	Epidermis	SRX12567770, SRX12567778, SRX12567779
VDR	TFs and others	Epidermis	SRX20097673, SRX20097674, SRX20097675, SRX20097676, SRX20097677, SRX20097678
H4K5K8K12K16ac	Histone	Epidermis	SRX641905, SRX641941
NR2F2	TFs and others	Epidermis	SRX3088617, SRX3088619
H3K9ac	Histone	Epidermis	SRX038658, SRX038659, SRX067416, SRX067460, SRX1184122, SRX1184128, SRX1184134, SRX2636031, SRX2636032, SRX3103109, SRX3103115, SRX641893, SRX641929
PHF8	TFs and others	Epidermis	SRX14204991, SRX14204993, SRX14204994
FOSL1	TFs and others	Epidermis	SRX4074762, SRX9350647
H1.0	Histone	Epidermis	SRX885218, SRX885219
HEXIM1	TFs and others	Epidermis	SRX11955267, SRX15426928, SRX535455, SRX535456
GATA4	TFs and others	Epidermis	SRX2368884, SRX2368885, SRX2431538, SRX2431539
ATAC-Seq	ATAC-Seq	Epidermis	DRX444237, DRX444238, DRX444239, DRX444240, DRX444241, DRX444242, DRX489291, DRX489292, SRX10640880, SRX10640881, SRX10640882, SRX10640883, SRX10640884, SRX10640885, SRX10640886, SRX10640887, SRX10640888, SRX10640889, SRX10640890, SRX10640891, SRX10660786, SRX10660787, SRX10660788, SRX10660789, SRX10660790, SRX10660791, SRX10660792, SRX10660793, SRX10660794, SRX10660813, SRX10660814, SRX10660815,…
SUPT6H	TFs and others	Epidermis	SRX8607604, SRX8607605
JUND	TFs and others	Epidermis	SRX1136730, SRX1136734, SRX1136738, SRX1136745
FOSL2	TFs and others	Epidermis	SRX10640864, SRX10640865, SRX10640866, SRX10640867, SRX3367141
MAX	TFs and others	Epidermis	SRX1058475, SRX1058479
ATF3	TFs and others	Epidermis	SRX1759184, SRX1759186, SRX2207915, SRX2207916, SRX2207917, SRX2207918
DNMT3B	TFs and others	Epidermis	SRX1916934, SRX1916936, SRX1916938, SRX873805, SRX873814
SMARCB1	TFs and others	Epidermis	SRX5888971, SRX5888972, SRX5888973, SRX5888974, SRX5888975
HNRNPK	TFs and others	Epidermis	SRX4996447, SRX4996448, SRX4996449
SMARCA4	TFs and others	Epidermis	SRX10640844, SRX718422, SRX718423, SRX719732, SRX971582, SRX971583, SRX971584
HIF1A	TFs and others	Epidermis	SRX2584126, SRX2584127
DDX21	TFs and others	Epidermis	SRX5501656, SRX5501658, SRX5501660, SRX8257413, SRX8257414, SRX8257415, SRX8257416
KLF4	TFs and others	Epidermis	SRX130062, SRX5360641, SRX5360642, SRX5360649, SRX5360650, SRX5360661, SRX5360662, SRX543181
H3K9me2	Histone	Epidermis	SRX2635823, SRX2635824
JUN	TFs and others	Epidermis	SRX6582163, SRX6582164, SRX6582165, SRX9350646
KDM1A	TFs and others	Epidermis	SRX5233154, SRX5233155, SRX543183, SRX6384905, SRX6384906, SRX6384907, SRX6384908
HSF1	TFs and others	Epidermis	SRX767115, SRX767116
GRHL3	TFs and others	Epidermis	SRX204107, SRX2582161, SRX2582162
MITF	TFs and others	Epidermis	SRX10640872, SRX10640873, SRX10640874, SRX10640875, SRX1555434, SRX1555435, SRX1555436, SRX1555438, SRX1555439, SRX1555440, SRX346921, SRX346922, SRX685340, SRX685341, SRX6878427, SRX6878428, SRX6878429, SRX6878430, SRX6878431, SRX6878432, SRX6878434, SRX6878435, SRX6878436, SRX6878437, SRX6878438, SRX6878439, SRX6878441, SRX6878442, SRX6878443, SRX6878444, SRX6878445, SRX6878446, SRX7368251, SRX…
H3	Histone	Epidermis	SRX109442, SRX109445, SRX109448, SRX109451, SRX16698747, SRX16698748, SRX16698749, SRX16698750, SRX22536537, SRX22536538, SRX22536540, SRX22536541, SRX22536542, SRX22536543, SRX22536544, SRX3679909, SRX3679912, SRX641876, SRX641911, SRX6756374, SRX6756375, SRX6756376, SRX6756380, SRX6756381, SRX6756382
TFAP2C	TFs and others	Epidermis	SRX190406
CDK9	TFs and others	Epidermis	SRX535453, SRX535454, SRX5501657, SRX5501659, SRX5501661
CREB1	TFs and others	Epidermis	SRX9930990
H2BK5ac	Histone	Epidermis	SRX641875, SRX641910
SMAD3	TFs and others	Epidermis	SRX1012146, SRX11483609
POU5F1	TFs and others	Epidermis	SRX130060, SRX185775, SRX2431535, SRX5774914, SRX5774915, SRX5774916, SRX5774919, SRX5774920
MKL1	TFs and others	Epidermis	SRX7972420, SRX7972427, SRX7972439, SRX7972440, SRX7972447, SRX7972448, SRX7972449, SRX7972450, SRX7972451, SRX7972452
H3K4me1	Histone	Epidermis	SRX038652, SRX038653, SRX067449, SRX1003169, SRX1003170, SRX1008493, SRX1012137, SRX1012140, SRX1012143, SRX10976846, SRX10976847, SRX10977277, SRX10977278, SRX10977489, SRX10977490, SRX11033322, SRX11033323, SRX11033324, SRX11033325, SRX11033326, SRX11033327, SRX11033328, SRX11033329, SRX11033330, SRX11033331, SRX11033332, SRX11033333, SRX11033334, SRX11033335, SRX11033336, SRX11033337, SRX11033…
EZH2	TFs and others	Epidermis	SRX10020169, SRX10020172, SRX10976426, SRX10976427, SRX10976477, SRX10976478, SRX186685, SRX186746, SRX5360084, SRX5360085, SRX5360089, SRX5360090, SRX5360094, SRX5360095, SRX5813556, SRX5813557, SRX5813558
LMNA	TFs and others	Epidermis	SRX1781647, SRX1781649, SRX1781651, SRX1781653, SRX1781655, SRX1781657, SRX1781659, SRX200046, SRX200048, SRX200050, SRX200052, SRX2791697, SRX2791699, SRX3962733, SRX3962736, SRX3962738, SRX3962742, SRX3962743, SRX447385, SRX447387, SRX447388
CTCF	TFs and others	Epidermis	SRX031248, SRX038644, SRX038645, SRX067387, SRX067495, SRX080340, SRX080341, SRX080343, SRX080358, SRX080370, SRX080377, SRX080410, SRX080413, SRX080415, SRX080422, SRX102973, SRX10640849, SRX10640850, SRX10640851, SRX10640852, SRX10976217, SRX10976218, SRX10976513, SRX10976514, SRX10976515, SRX10976516, SRX10977237, SRX10977238, SRX10977274, SRX10977275, SRX12669721, SRX12669722, SRX14609190, SR…
LMNB1	TFs and others	Epidermis	SRX2791698, SRX2791700
H2Aub	Histone	Epidermis	SRX14609200, SRX14609203, SRX14609206, SRX14609209

## Sheet: Pancreas
Antigen	Antigen class	Cell type class	Accession ID
FOS	TFs and others	Pancreas	SRX4677295, SRX7760063, SRX7760064
H2AK119ub	Histone	Pancreas	SRX4737856, SRX4737857, SRX4737860, SRX4737861
FOXA1	TFs and others	Pancreas	SRX1389379, SRX1389381, SRX6441747, SRX6441748, SRX6441749, SRX825395
ZBED2	TFs and others	Pancreas	SRX7283264, SRX7283265, SRX7283270
H3K9me3	Histone	Pancreas	SRX10976665, SRX10976666, SRX10976667, SRX10976668, SRX10976669, SRX10976670, SRX13006766, SRX13006767, SRX13006768, SRX13007973, SRX13007974, SRX13008077, SRX13008078, SRX13008079, SRX13008080, SRX1722847, SRX1722848, SRX1722865, SRX1722866, SRX1722883, SRX1722884, SRX1722899, SRX1722900, SRX2156843, SRX2156844, SRX2636271, SRX2636272, SRX3010127, SRX3010188, SRX756819, SRX756820, SRX756821, SRX…
SIN3A	TFs and others	Pancreas	SRX190241
RNA polymerase II	RNA polymerase	Pancreas	SRX17119550, SRX17119551, SRX17119552, SRX17119553, SRX17119554, SRX17119555, SRX17119556, SRX17119557, SRX190244, SRX20629945, SRX20629946, SRX20629947, SRX20629948, SRX20629949, SRX20629950, SRX20629951, SRX20629952, SRX3322178, SRX3322247, SRX3322465, SRX3322971
H2A.Z	Histone	Pancreas	SRX10600225, SRX10600226, SRX10600227, SRX10600228
GATA1	TFs and others	Pancreas	SRX16111826, SRX16111827, SRX16111830, SRX16111831
JUNB	TFs and others	Pancreas	SRX4677294
H3K27ac	Histone	Pancreas	SRX10000141, SRX10000142, SRX10000143, SRX10000144, SRX10000145, SRX10000146, SRX10000147, SRX10000148, SRX10000149, SRX10000150, SRX10000151, SRX10000152, SRX101484, SRX10187637, SRX10187638, SRX10187645, SRX10187646, SRX10187699, SRX10187700, SRX10976179, SRX10976180, SRX10976181, SRX10976182, SRX1098172, SRX1098173, SRX11169163, SRX11169164, SRX11169165, SRX11169166, SRX11243163, SRX11243164, …
PAX6	TFs and others	Pancreas	SRX2203276, SRX2203277
KLF5	TFs and others	Pancreas	SRX825398
BRD4	TFs and others	Pancreas	SRX17119542, SRX17119543, SRX17119544, SRX17119545, SRX17119546, SRX17119547, SRX17119548, SRX17119549, SRX1823819, SRX1823820
Epitope tags	TFs and others	Pancreas	SRX11485697, SRX11485698, SRX4179961, SRX5504127
ATF4	TFs and others	Pancreas	SRX8510435, SRX8510436
H3K27me3	Histone	Pancreas	SRX10976661, SRX10976662, SRX10976663, SRX10977532, SRX10977533, SRX10977534, SRX13005535, SRX13005536, SRX13005537, SRX13005538, SRX13006274, SRX13006275, SRX13007923, SRX13007924, SRX1707573, SRX1707574, SRX1707575, SRX1707576, SRX1722843, SRX1722844, SRX1722859, SRX1722860, SRX1722877, SRX1722878, SRX1722912, SRX1722913, SRX1722928, SRX1722929, SRX2156841, SRX2156842, SRX3010142, SRX3010201, S…
H3K4me3	Histone	Pancreas	SRX026701, SRX026704, SRX026705, SRX026712, SRX026717, SRX10187658, SRX10187659, SRX10187709, SRX10187710, SRX10976188, SRX10976189, SRX10976690, SRX10976691, SRX10976812, SRX10976813, SRX13009007, SRX13009008, SRX13009009, SRX13009010, SRX152077, SRX1681503, SRX1681504, SRX1681505, SRX1681506, SRX1681507, SRX1681508, SRX1681509, SRX1722869, SRX1722870, SRX17579971, SRX17579972, SRX17579973, SRX1…
H3K36me3	Histone	Pancreas	SRX10187629, SRX10187630, SRX10976519, SRX10976520, SRX10977315, SRX10977316, SRX16499719, SRX16499720, SRX16499721, SRX16499722, SRX17119534, SRX17119535, SRX17119536, SRX17119537, SRX17119538, SRX17119539, SRX17119540, SRX17119541, SRX1722845, SRX1722846, SRX1722861, SRX1722862, SRX1722879, SRX1722880, SRX2156835, SRX2156836, SRX2635992, SRX2635993, SRX2636193, SRX2636194, SRX375319, SRX375326,…
HOXB8	TFs and others	Pancreas	SRX4677290
TP63	TFs and others	Pancreas	SRX19885614, SRX19885671, SRX19885676, SRX19885681, SRX19885819, SRX19885823, SRX19885826, SRX4179959
TCF7L2	TFs and others	Pancreas	SRX100942
MYC	TFs and others	Pancreas	SRX15730808, SRX15730809, SRX15730814, SRX15730815, SRX7572096, SRX7572097, SRX7572098, SRX7572099, SRX7572100, SRX7572101
GATA6	TFs and others	Pancreas	SRX288274, SRX288275
FOXA2	TFs and others	Pancreas	SRX4677288, SRX4677289, SRX4677291, SRX4677292, SRX4677296, SRX4677298, SRX5504125, SRX5504126, SRX5504128, SRX5504129, SRX6441750, SRX6441751, SRX6441752, SRX6441753, SRX6441754, SRX6441755
TOP1	TFs and others	Pancreas	SRX20629953, SRX20629954, SRX20629955, SRX20629956, SRX20629959, SRX20629960
H4ac	Histone	Pancreas	SRX20742004, SRX20742006
HDAC1	TFs and others	Pancreas	SRX9187408, SRX9187409, SRX9187410, SRX9187411, SRX9187412, SRX9187413, SRX9187414, SRX9187415
MYBBP1A	TFs and others	Pancreas	SRX8171720, SRX8171721, SRX8171722, SRX8171726, SRX8171727, SRX8171728, SRX8171731, SRX8171732, SRX8171735, SRX8171736, SRX8171739, SRX8171740
SOX9	TFs and others	Pancreas	SRX10175282, SRX10175283
MYRF	TFs and others	Pancreas	SRX7760058, SRX7760059, SRX7760060, SRX7760061
BAP1	TFs and others	Pancreas	SRX4737854, SRX4737855, SRX4737858, SRX4737859
REST	TFs and others	Pancreas	SRX100415, SRX190248, SRX190315
ATAC-Seq	ATAC-Seq	Pancreas	ERX2722672, ERX2722673, SRX10000129, SRX10000130, SRX10000131, SRX10000132, SRX10151023, SRX10151024, SRX10151025, SRX10151026, SRX10151027, SRX10151028, SRX10151029, SRX10151030, SRX10151031, SRX10151032, SRX10151033, SRX10151034, SRX10151035, SRX10151036, SRX10151037, SRX10151038, SRX10151039, SRX10151040, SRX10424693, SRX10424697, SRX10424700, SRX10424701, SRX10424703, SRX10424704, SRX10424705…
ELF3	TFs and others	Pancreas	SRX1389378, SRX1389380, SRX825394
HIF1A	TFs and others	Pancreas	SRX14991419, SRX14991420, SRX14991421, SRX14991422, SRX14991423, SRX14991424
KLF4	TFs and others	Pancreas	SRX1389376
MED12	TFs and others	Pancreas	SRX19885613, SRX19885616, SRX19885618, SRX19885675, SRX19885818, SRX19885821, SRX19885825
H3K9me2	Histone	Pancreas	SRX1722851, SRX1722852, SRX1722867, SRX1722868, SRX1722885, SRX1722886, SRX1722920, SRX1722936, SRX756815, SRX756816, SRX756817, SRX756818
IRF1	TFs and others	Pancreas	SRX7283267, SRX7283269, SRX7283271, SRX825397
ZEB1	TFs and others	Pancreas	SRX2245437, SRX2245441, SRX2245442, SRX825399
STAT1	TFs and others	Pancreas	SRX10000133, SRX10000134, SRX10000135, SRX10000136, SRX10000137, SRX10000138, SRX10000139, SRX10000140
TFEB	TFs and others	Pancreas	SRX20571601, SRX20571603
HNF1B	TFs and others	Pancreas	SRX5504130, SRX825396
CSTF2	TFs and others	Pancreas	SRX17119558, SRX17119559, SRX17119560, SRX17119561, SRX17119562, SRX17119563, SRX17119564, SRX17119565
BACH1	TFs and others	Pancreas	SRX5183151, SRX5183152
H3K4me1	Histone	Pancreas	SRX026708, SRX026711, SRX026716, SRX101485, SRX10976172, SRX10976173, SRX10976805, SRX10976806, SRX10976807, SRX10977302, SRX10977303, SRX10977304, SRX13005464, SRX13005465, SRX13005466, SRX13005467, SRX17579969, SRX17579970, SRX2037270, SRX2037273, SRX2037276, SRX2636366, SRX2636367, SRX3010033, SRX3010270, SRX825373, SRX825374, SRX825375, SRX825376, SRX825377, SRX825407, SRX825408, SRX825409, S…
KLF6	TFs and others	Pancreas	SRX1389377
CTCF	TFs and others	Pancreas	SRX026719, SRX026720, SRX1026678, SRX1026679, SRX1026680, SRX1026681, SRX10976458, SRX10976459, SRX10976835, SRX10976836, SRX10976859, SRX10976860, SRX10977140, SRX10977141, SRX13009235, SRX13009236, SRX188958, SRX2896486, SRX3321949, SRX3321950, SRX3322135, SRX3322207, SRX3322215, SRX3322606, SRX6784020, SRX7509475, SRX7509476, SRX7509550, SRX7509551

[truncated: 5 more sheets: Prostate, Adipocyte, Digestive_tract, Bone, Uterus]
