# Supplementary material for: Deep Learning Deciphers the Related Role of Master Regulators and G-Quadruplexes in Tissue Specification
Source: Research Square preprint supplement (doi:10.21203/rs.3.rs-6165621/v1), 2025-03-11
Supplement: Supplementary file 4 [file 84bd2c38a7b9a7370f0b3633.xlsx]

## Sheet: INFO
Deep Learning Deciphers the Related Role of Master Regulators and G-Quadruplexes in Tissue Specification
	Artem Bashkatov, Andrey Andreasyan, Dmitry Konovalov, Alan Herbert, Maria Poptsova
Supplementary Table 4.			Lists of TissueEnrich-confirmed genes.
	This table contains lists of genes with GQ predictions in promoters that were highlighted as tissue-specific by TissueEnrich tool for all the 14 tissues assessed in the study.

## Sheet: Adipocyte
SCN4A
MLXIPL
TBX15
PALMD
HAS1
ADRA1A
AVPR2
CDO1
ANGPTL8
AOC3
AOC2
EN1
PTX3
AQP7
SHOX2
HAS2
ABCD2
CIDEC
SPAAR
MYMX

## Sheet: Bone
SLC4A1
LTF
GNA15
SEC14L3
BPI
GATA1
RETN
CEACAM4
ICAM4
NKG7
SIGLEC5
TSPO2
CSF3R
GCNT7
CFP
PRAM1
FGFBP2
MYO1F
LCN2
PADI4
TAL1
NLRP3
TRIM58
S100A9
VPREB1
ITGAM
RASGRP4
CTSW
APOBEC3B
SPATC1
PRTN3
SPN
LILRB3
TNF
LILRA2
CCL3

## Sheet: Breast
ALX4
MGP
EFHD1
ATP6V1B1
SCGB1D2
IL17B
ELF5
GLRA3
AZGP1
EN1
KRT15
MYEOV
CST9
GJC3
LGALS7B
ALOX15B
C6ORF223
RNF39
LGALS7
RAB6C
AKR1B15
ARHGEF38

## Sheet: Cardiovascular
MYOM2
NMRK2
MYH7
MYL7
CHRNE
SGCA
MYL2
APOBEC2
CKMT2
MYO18B
PEBP4
LRRC49
UNC45B
MYOM3
PPP1R1C
GRM1
ADPRHL1
SPHKAP
PLPP7
MYL3
CMYA5
TXLNB
PGAM2
KCNJ4
HSPB7
ABRA
NPPA
LSMEM2
CAV3
KBTBD12
MYH6
MB
ALPK2
MYBPHL

## Sheet: Digestive tract
GUCA2B
CEACAM1
VIL1
TPH1
CHST5
MUC4
SLC26A2
PRAC1
TFF3
CDX2
PPP1R14D
B4GALNT2
CDC42EP5
HOXD12
KRT20
ATOH1
CES3
RXFP4
SULT1B1
ISX
SH2D7
B3GALT5
FFAR4
FAM3D
NEU4
TRIM15
TRIM31
MUC12
PHGR1
LEFTY1
TMEM238L
FCGBP
MLXIPL
SLC7A9
CREB3L3
SCT
CDHR2
APOB
CYP2D6
KCNK10
R3HDML
TLDC2
REG1A
TREH
XPNPEP2
UNC5CL
VIL1
GAL3ST1
CALML4
TPH1
NR0B2
DDC
ACY3
HNF1A
CHST5
GATA4
MTTP
SSTR1
TM4SF5
SLC2A5
ABCG8
SLC28A1
ADGRG4
TFF2
NEUROD1
NKX6-3
CDX2
PPP1R14D
ANPEP
TMEM92
PRR15L
MUC3A
MYO7B
KRT20
GLOD5
ATOH1
PDZD3
CES3
RXFP4
C11ORF86
SULT1B1
ISX
FUT2
GPR35
TMEM139
RNF186
GLTPD2
SH2D7
B3GALT5
CCK
HAPLN4
CTSE
SULT1A2
NEU4
TRIM15
ERICH4
SULT1A4
CEACAM18
PHGR1
OMP
CCL26
SLC6A7
CEACAM1
SCGN
VIL1
TPH1
GALNT8
CHST5
CAPN9
SLC26A2
PRAC1
HOXB13
TFF3
CAPN13
CDX2
PPP1R14D
HOXD12
LGALS9B
KRT20
LGALS9C
ATOH1
CES3
RXFP4
SULT1B1
ISX
GPX2
B3GALT5
FFAR4
FAM3D
SAMD13
NEU4
MUC12
PRAC2
PHGR1
LEFTY1
TMEM238L
GIPR
SCGN
SLC5A5
CA9
ALDH3A1
CCKBR
UNC5CL
NKX2-2
BPIFB1
TPH1
CAPN9
VILL
SSTR1
TFF2
TFF1
CAPN13
NEUROD1
S100P
NKX6-3
LGALS9B
LGALS9C
MYEOV
SULT1B1
HAP1
ZSCAN4
CTSE
TRIM31
MUC5AC
SMIM6
TMEM238L
AOC1
SLC7A9
GUCA2B
CREB3L3
SCT
CDHR2
APOB
CYP2D6
R3HDML
TLDC2
REG1A
TREH
APOA1
XPNPEP2
UNC5CL
VIL1
GAL3ST1
CALML4
TPH1
DDC
ACY3
HNF1A
CHST5
MTTP
TM4SF5
SLC2A5
ABCG8
SLC28A1
ADGRG4
CAPN13
NEUROD1
CDX2
PPP1R14D
ANPEP
TMEM92
NAALADL1
MUC3A
MYO7B
KRT20
GLOD5
CYP4F11
ATOH1
PDZD3
RXFP4
C11ORF86
SULT1B1
ISX
GPR35
RNF186
SLC17A8
SH2D7
B3GALT5
HAPLN4
SULT1A2
NEU4
TRIM31
ERICH4
SULT1A4
CEACAM18
PHGR1
OMP

## Sheet: Epidermis
FAT2
TMEM40
KRT31
PTGS1
PLA2G3
KLF8
MT4
ACSBG1
CNFN
RAPGEFL1
ALDH3A1
FOXN1
TFAP2E
TP53AIP1
RAB38
CPA4
SOX15
KLK14
AJUBA
GDPD2
TRPM1
TRIM29
TMPRSS13
CARD14
TUFT1
IL34
EN1
PGLYRP4
DCST2
DCST1
ADGRF2
SLC39A2
KLK5
KLK7
KRT15
LCE1D
ZIC4
CALML5
XKRX
TSPAN10
NDUFA4L2
KRT5
KRT3
CYP27C1
S100A3
FAM25A
SBSN
FAM180B
GAL3ST4
GPRIN2
PSORS1C2
LGALS7
SERPINB5
PSG7
LCE1F
GNG14

## Sheet: Kidney
SLC7A9
FMO4
AQP6
NOX4
SLC2A9
DAO
ATP6V1B1
SPP1
PCK1
HNF1A
SLC22A7
AOX1
NAT8
BHMT
PLPPR1
FREM2
SLC5A10
SLC28A1
HPD
NPHS1
PDZK1IP1
BSND
CDH16
GLYATL1
ACSF2
SLC22A11
PAH
DMRT2
KLHDC7A
ALX1
CLCNKA
SULT1C2
MCCD1
ERICH4
TMEM213
PRODH2
HNF1B

## Sheet: Liver
PON1
MLXIPL
CREB3L3
FMO4
SLC27A5
CYP2D6
PON3
TFR2
APOC3
DAO
HYAL1
PROC
SERPINC1
APOA1
ADRA1A
A1BG
CDO1
ANGPTL8
APOC1
FMO5
NR0B2
HMGCS2
SDS
AGT
SLC22A7
AOX1
MTTP
INHBE
ASGR1
BHMT
CNDP1
KDM8
HPD
PFKFB1
CBS
PGLYRP2
ASGR2
ITIH3
ETNPPL
KLKB1
GLYATL1
ACOX2
PCSK9
GJB1
LRG1
PAH
CYP4F11
CA5A
PIPOX
F2
FYB2
SERPINA5
IL1RAP
SERPINA1
IL27
CES1
NEU4
SPDYC
C4B
CFB
GDF2

## Sheet: Lung
SLC11A1
ADGRF5
CEACAM6
TBX5
TREM2
SEC14L3
PLA2G3
SPOCK2
FOLR1
LRRN4
NAPSA
SFTPD
PEBP4
GRP
HMCN1
SHROOM4
PTGIR
FGFR4
CSF2
CLEC14A
C6ORF223
C1ORF116
SFTPA2
CCDC190
S100A3
CYP2F1
CES1
GPRIN2
HLA-DMA
NOTCH4
AGER
LILRB3
AGBL1

[truncated: 5 more sheets: Muscle, Neural, Pancreas, Prostate, Uterus]
