# Supplementary material for: Deep Learning Deciphers the Related Role of Master Regulators and G-Quadruplexes in Tissue Specification
Source: Research Square preprint supplement (doi:10.21203/rs.3.rs-6165621/v1), 2025-03-11
Supplement: Supplementary file 5 [file 901e11145dc4c4450674c1ce.xlsx]

## Sheet: Info
Deep Learning Deciphers the Related Role of Master Regulators and G-Quadruplexes in Tissue Specification
	Artem Bashkatov, Andrey Andreasyan, Dmitry Konovalov, Alan Herbert, Maria Poptsova
Supplementary Table 5.			DeepGQ, EndoQuad, MRG, AGO1-2, APOBEC3B tracks intersections.

## Sheet: Comparison table
In Promoters (-2000, +200)
to from	DeepGQ_CORE			DeepGQ_NEURAL_wo_CORE			EndoQuad_1-3			EndoQuad_4-6			NEUROD1			DNA-RNA_hybrid			AGO1			AGO2			APOBEC3B_DOX+_DMSO			APOBEC3B_DOX+_PMA_2h			DHX36
	#	%	p_value	#	%	p_value	#	%	p_value	#	%	p_value	#	%	p_value	#	%	p_value	#	%	p_value	#	%	p_value	#	%	p_value	#	%	p_value	#	%	p_value
DeepGQ_CORE	37444	100	N/A	0	0	1	4499	12.02	< 0.001	32441	86.64	< 0.001	14188	37.89	< 0.001	15662	41.83	< 0.001	9406	25.12	< 0.001	14221	37.98	< 0.001	1320	3.53	< 0.001	1070	2.86	< 0.001	11244	30.03	< 0.001
DeepGQ_NEURAL_wo_CORE	0	0	1	20793	100	N/A	9020	43.38	< 0.001	5493	26.42	< 0.001	3592	17.28	1	4574	22	1	2268	10.91	0.099	3721	17.9	0.795	377	1.81	< 0.001	324	1.56	< 0.001	2802	13.48	< 0.001
EndoQuad_1-3	6065	22.81	1	9918	37.3	< 0.001	26590	100	N/A	0	0	1	1837	6.91	1	4607	17.33	1	992	3.73	1	2223	8.36	1	231	0.87	1	282	1.06	0.998	1350	5.08	0.199
EndoQuad_4-6	47359	86.54	< 0.001	5836	10.66	< 0.001	0	0	1	54723	100	N/A	18847	34.44	< 0.001	22368	40.87	< 0.001	12178	22.25	1	18775	34.31	< 0.001	1840	3.36	< 0.001	1537	2.81	< 0.001	16908	30.9	< 0.001
NEUROD1	33893	57.82	< 0.001	11105	18.95	< 0.001	4232	7.22	< 0.001	34802	59.37	< 0.001	58616	100	N/A	27207	46.42	< 0.001	30433	51.92	1	36760	62.71	< 0.001	4227	7.21	< 0.001	2673	4.56	< 0.001	28967	49.42	< 0.001
DNA-RNA_hybrid	25171	69.91	< 0.001	11099	30.83	< 0.001	7034	19.54	1	24604	68.33	< 0.001	22031	61.19	< 0.001	36006	100	N/A	15939	44.27	< 0.001	22302	61.94	< 0.001	2797	7.77	< 0.001	1962	5.45	< 0.001	14589	40.52	< 0.001
AGO1	12855	68.81	< 0.001	4094	21.91	< 0.001	1303	6.97	1	12894	69.02	< 0.001	14228	76.16	< 0.001	9738	52.13	< 0.001	18682	100	N/A	15543	83.2	< 0.001	2786	14.91	< 0.001	1739	9.31	< 0.001	9424	50.44	< 0.001
AGO2	18134	72.39	< 0.001	6452	25.76	< 0.001	2910	11.62	1	17937	71.6	< 0.001	18180	72.57	< 0.001	13916	55.55	< 0.001	15401	61.48	< 0.001	25050	100	N/A	2113	8.44	< 0.001	1389	5.54	< 0.001	11679	46.62	< 0.001
APOBEC3B_DOX+_DMSO	757	57.96	< 0.001	328	25.11	< 0.001	175	13.4	1	768	58.81	< 0.001	814	62.33	< 0.001	632	48.39	0.002	798	61.1	< 0.001	873	66.85	< 0.001	1306	100	N/A	489	37.44	< 0.001	577	44.18	< 0.001
APOBEC3B_DOX+_PMA_2h	598	50.94	< 0.001	268	22.83	< 0.001	198	16.87	0.741	583	49.66	< 0.001	559	47.61	0.015	471	40.12	0.996	538	45.83	< 0.001	611	52.04	< 0.001	512	43.61	< 0.001	1174	100	N/A	439	37.39	< 0.001
DHX36	4405	81.95	< 0.001	1980	36.84	< 0.001	871	16.2	1	4561	84.86	< 0.001	4593	85.45	< 0.001	2929	54.49	0.002	3306	61.51	< 0.001	4007	74.55	< 0.001	482	8.97	< 0.001	347	6.46	< 0.001	5375	100	N/A
Full tracks
to from	DeepGQ_CORE			DeepGQ_NEURAL_wo_CORE			EndoQuad_1-3			EndoQuad_4-6			NEUROD1			DNA-RNA_hybrid			AGO1			AGO2			APOBEC3B_DOX+_DMSO			APOBEC3B_DOX+_PMA_2h			DHX36
DeepGQ_CORE	124618	100		0	0		40539	32.53		78859	63.28		19363	15.54		34474	27.66		17548	14.08		32231	25.86		2748	2.21		2500	2.01		17944	14.4
DeepGQ_NEURAL_wo_CORE	0	0		183104	100		87344	47.7		19869	10.85		8103	4.43		16710	9.13		6701	3.66		15039	8.21		1611	0.88		1812	0.99		7215	3.94
EndoQuad_1-3	53814	21.42		95760	38.12		251210	100		0	0		5635	2.24		28142	11.2		5096	2.03		17372	6.92		1414	0.56		1929	0.77		5271	2.1
EndoQuad_4-6	113827	81.14		21155	15.08		0	0		140293	100		25668	18.3		44093	31.43		22364	15.94		39739	28.33		3689	2.63		3436	2.45		28103	20.03
NEUROD1	42226	16.01		19287	7.31		10158	3.85		43020	16.31		263822	100		35608	13.5		39355	14.92		46811	17.74		5749	2.18		3892	1.48		35360	13.4
DNA-RNA_hybrid	45620	44.07		30232	29.2		27163	26.24		39157	37.83		35616	34.41		103519	100		35697	34.48		46610	45.03		6565	6.34		5070	4.9		20415	19.72
AGO1	21922	40.82		10363	19.3		6003	11.18		20974	39.05		23471	43.7		21596	40.21		53707	100		33647	62.65		5178	9.64		3610	6.72		12964	24.14
AGO2	35871	54.17		21538	32.53		17086	25.8		31308	47.28		24410	36.87		26612	40.19		29130	43.99		66214	100		3854	5.82		2781	4.2		15327	23.15
APOBEC3B_DOX+_DMSO	1510	26.06		1253	21.62		915	15.79		1410	24.33		1315	22.69		1498	25.85		1638	28.27		1749	30.18		5795	100		2493	43.02		1039	17.93
APOBEC3B_DOX+_PMA_2h	1380	19.69		1351	19.28		1170	16.7		1243	17.74		1019	14.54		1260	17.98		1213	17.31		1318	18.81		2542	36.27		7008	100		866	12.36
DHX36	6400	62.28		4506	43.85		2977	28.97		6614	64.36		5931	57.72		3786	36.84		4468	43.48		5187	50.48		834	8.12		657	6.39		10276	100
