# Supplementary material for: Deep Learning Deciphers the Related Role of Master Regulators and G-Quadruplexes in Tissue Specification
Source: Research Square preprint supplement (doi:10.21203/rs.3.rs-6165621/v1), 2025-03-11
Supplement: Supplementary file 6 [file a6b9fd05f939fb5f29f04c5e.xlsx]

## Sheet: Info
Deep Learning Deciphers the Related Role of Master Regulators and G-Quadruplexes in Tissue Specification
	Artem Bashkatov, Andrey Andreasyan, Dmitry Konovalov, Alan Herbert, Maria Poptsova
Supplementary Table 3.			14 tissue-specific gene lists with GQs in promoters and relevant DAVID assessments.
	The tables contain lists of genes, which have at least one GQ prediction within promoter regions.
	Promoter regions are defined as [-2000, +200] basepairs from Transcription start site (TSS).
	The relevant DAVID assessments for each tissue gene list are presented in separate tabs of this table.
	o

## Sheet: Liver
DDX11L1
MIR12136
ISG15
SCNN1D
ACOT7
CAMTA1-AS2
SLC2A5
C1orf167-AS1
NPPA-AS1
RNU5E-1
SNORA59A
MIR6730
PDPN
CTRC
SLC25A34-AS1
HSPB7
RNU1-1
ESPNP
MST1L
MIR3675
CROCC
MIR3972
RCC2-AS1
ARHGEF10L
IGSF21
KLHDC7A
MIR4695
AKR7L
RNF186
OTUD3
PLA2G2E
PLA2G2A
PLA2G2D
LINC01757
VWA5B1
CELA3A
ZBTB40
C1QA
MIR4425
EXTL1
LIN28A
GPN2
NR0B2
PPP1R8
RPA2
EYA3
TAF12-DT
TAF12
RNU11
LAPTM5
ZBTB8B
MIR552
GJB4
SFPQ
TFAP2E
MRPS15
CSF3R
EPHA10
MANEAL
MACF1
PPIEL
ZNF684
FOXO6-AS1
GUCA2B
CCDC30
CFAP57
MIR6733
EBNA1BP2
C1orf210
MPL
MIR6735
MIR6079
KLF17
MMACHC
P3R3URF
KNCN
PDZK1IP1
TAL1
STIL
MIR4421
MIR6500
TTC39A-AS1
CDCP2
BSND
PCSK9
FYB2
C1orf87
UBE2U
PDE4B
SGIP1
DYNLT5
SERBP1
MSH4
RPF1
GBP2
BTBD8
C1orf146
RPL5
OLFM3
HENMT1
MYBPHL
CSF1
CYMP-AS1
MOV10
SPAG17
LOC105378933
HMGCS2
LOC100996318
RNVU1-4
PDE4DIP
HJV
NUDT17
RNF115
POLR3C
FMO5
NBPF11
LINC02805
RNVU1-15
RNVU1-18
LINC02591
H2BP2
H2BC18
H4C14
H3C14
H2AC18
H2AC19
H2BC20P
H3C15
H2BC21
H2AC21
VPS45
LINC02988
MRPS21
TARS2
GOLPH3L
SETDB1
GABPB2
LYSMD1
RFX5
SELENBP1
TUFT1
RORC
LCE1A
PGLYRP4
S100A14
LOC343052
HAX1
PBXIP1
MIR4258
LENEP
DCST1
DCST2
DPM3
POU5F1P4
MSTO1
RXFP4
SEMA4A
SLC25A44
GLMP
LOC101928177
NES
PRCC
ETV3L
DCAF8
CD244
TOMM40L
MIR5187
PCP4L1
DUSP12
NUF2
RGS5
MIR3658
BLZF1
NME7
FMO1
FMO4
DARS2
SERPINC1
ASTN1
CLEC20A
AXDND1
COLGALT2
HMCN1
BRINP3-DT
CACNA1S
ASCL5
IPO9-AS1
GPR37L1
ATP2B4
KISS1
PLEKHA6
PPP1R15B
RBBP5
MIR6769B
FCMR
LOC148696
LAMB3
LINC00467
RPS6KC1
TGFB2-AS1
TAF1A-AS1
TAF1A
CAPN2
LEFTY1
LEFTY2
LOC105373289
LINC02809
MIR3620
MIR6742
TRIM17
AGT
CAPN9
C1orf131
TSNAX-DISC1
TSNAX
LINC01132
RBM34
HEATR1
EXO1
KIF26B-AS1
CALML5
MIR3155A
PROSER2-AS1
CDC123
NUDT5
C1QL3
STAM
STAM-DT
SLC39A12
ARMC3
C10orf67-AS1
GPR158
APBB1IP
PTCHD3
EPC1
HSD17B7P2
LINC00839
LINC01518
LINC01264
SNORD3J
LINC00840
DEPP1
AGAP10P
GPRIN2
FAM25BP
AGAP9
GDF2
AGAP13P
AGAP12P
ARHGAP22
C10orf71-AS1
DRGX
TIMM23
AGAP6
ZWINT
TMEM26
TACR2
COL13A1
TYSND1
NODAL
TBATA
CDH23-AS1
C10orf105
MIR7152
CDH23
SPOCK2
CFAP70
DUSP29
SNCG
FAM25A
CH25H
NUDT9P1
FFAR4
HPS1-AS1
GOT1
CWF19L1
PKD2L1
HIF1AN
TLX1NB
NPM3
CALHM1
CFAP43
MXI1
TDRD1
ENO4
TIAL1
C10orf88
EEF1AKMT2
AS-PTPRE
LINC01163
CTAGE7P
LINC02870
LINC01168
SCART1
IFITM2
SCT
LINC02688
MUC5AC
TOLLIP
KRTAP5-3
KRTAP5-4
CD81
CARS1
MRGPRG
LOC101927708
CCKBR
TIMM10B
ARFIP2
DCHS1
IRAG1
SPON1
CALCB
LINC02751
C11orf58
LINC02729
TPH1
SLC25A51P4
LDHC
DBX1
LGR4-AS1
METTL15
KIF18A
IMMP1L
PAX6-AS1
CSTF3-DT
CSTF3
NAT10
ELF5
LOC101928510
ALKBH3
ALX4
DGKZ
F2
MIR6745
MIR4487
C1QTNF4
SERPING1
MIR130A
YPEL4
CLP1
GLYATL1
FAM111B
DTX4
ZP1
CD6
CD5
BEST1
LRRN4CL
SLC22A8
FERMT3
PYGM
MIR192
MIR6750
ATG2A
GPHA2
NAALADL1
SPDYC
SLC25A45
MIR612
RNASEH2C
CTSW
NPAS4
C11orf86
ACY3
MYEOV
SHANK2-AS1
KRTAP5-10
ANAPC15
MIR139
ARAP1
DNAJB13
RNF169
SPCS2
XRRA1
KLHL35
GUCY2EP
OMP
NDUFC2
KCTD21-AS1
ALG8
RAB30-DT
ANKRD42
ANKRD42-DT
TMEM126A
MIR3166
RAB38
ANKRD49
MRE11
SRSF8
LNCRNA-IUR
CFAP300
BIRC3
DYNC2H1
DDI1
GRIA4
CUL5
C11orf87
COLCA2
PIH1D2
TEX12
HTR3A
APOC3
APOA1
TMPRSS13
MPZL2
UBE4A
TREH
TRIM29
BSX
ROBO4
STT3A
STT3A-AS1
CHEK1
LOC118567325
VSIG10L2
LOC101929538
KCNJ5-AS1
TP53AIP1
LINC02551
LINC02714
LOC105369595
NINJ2
NINJ2-AS1
LINC00942
LRTM2
CACNA2D4
ITFG2
ITFG2-AS1
DYRK4
NTF3
TNFRSF1A
ING4
LAG3
C12orf57
RNU7-1
C1R
POU5F1P3
CLEC12A-AS1
EIF2S3B
STYK1
H4-16
RERG
KCNJ8
ABCC9
LINC00941
LINC02387
DENND5B-AS1
ALG10
PDZRN4
CCDC184
CCNT1
MIR4701
TROAP-AS1
AQP6
COX14
TMPRSS12
TFCP2
LINC00592
LINC02874
KRT7-AS
KRT3
KRT78
LOC122455340
PFDN5
SP7
HOXC5
MIR615
LOC100240735
CBX5
ZNF385A
RDH5
TMEM198B
DNAJC14
MMP19
LOC105369781
PAN2
SPRYD4
SNORD59A
ATP5F1B
NACA
PRIM1
GPR182
TAC3
NDUFA4L2
INHBE
GLI1
ARHGAP9
MARS1
DTX3
ARHGEF25
LOC101927583
OS9
AGAP2
MIR10527
XPOT
LGR5
GLIPR1L2
CAPS2
SYT1
C12orf29
CCER1
SOCS2
CRADD
SLC17A8
GAS2L3
LINC00485
PAH
C12orf73
POLR3B
RFX4
TMEM119
DAO
MIR6760
SDS
RBM19
TBX5
TBX5-AS1
TMEM233
RNU4-2
HNF1A
CAMKK2
MIR7107
HPD
LINC02985
ZCCHC8
PITPNM2
GTF2H3
EIF2B1
SCARB1
LINC02405
ZNF268
LOC101928697
SPATA13
TPTE2P1
NUP58
RPL21
LINC00543
CDX2
LINC00365
LINC00384
LINC00398
TEX26
TEX26-AS1
HSPH1
RFC3
UFM1
FREM2
LINC00437
LOC101929140
KBTBD6
COG3
ERICH6B
LINC01198
NUDT15
CDADC1
LOC105370203
LINC02333
TPTE2P3
MIR759
MIR1297
PRR20A
PRR20B
PRR20C
PRR20D
PRR20E
LINC01075
LINC00395
LINC01078
CTAGE11P
EDNRB
LOC780529
LINC00351
MIR622
LOC101927284
CLDN10-AS1
MIR623
LINC01039
CLYBL-AS3
LINC00554
ITGBL1
MIR8073
TEX29
TUBGCP3
ATP11A-AS1
GAS6-AS1
C13orf46
POTEM
APEX1
OSGEP
METTL17
SUPT16H
DAD1
AJUBA
PSMB11
CMTM5
MIR208A
MYH6
MHRT
MIR208B
MYH7
CPNE6
NRL
IRF9
REC8
MDP1
GMPR2
NEDD8-MDP1
TGM1
RIPK3
LINC02282
RNU6-8
PAX9
LOC112268136
CLEC14A
LINC02302
LRR1
RTRAF
OTX2-AS1
SIX6
PPP2R5E
GPX2
PIGH
ZFYVE26
LOC100996664
RBM25
VSX2
FCF1
AREL1
YLPM1
BATF
GPATCH2L
LINC01629
LINC02288
MIR1260A
NRXN3
LINC00642
LOC105370619
DGLUCY
TRIP11
ITPK1
MIR4506
ASB2
CCDC197
SERPINA2
SERPINA1
SERPINA5
TCL1B
MIR342
LINC00523
MIR493
RTL1
LINC02285
LINC00524
LOC105378183
MARK3
LINC00638
PLD4
FAM30A
CHEK2P2
MIR5701-1
LINC01193
MIR1268A
MKRN3
SNURF
SNORD115-5
SNORD115-15
SNORD115-18
SNORD115-22
SNORD115-24
SNORD115-26
SNORD115-28
SNORD115-29
SNORD115-31
SNORD115-41
MIR4715
GABRA5
TRPM1
MIR1233-1
MIR1233-2
LOC145845
KNL1
NDUFAF1
LTK
GANC
UBR1
SPG11
B2M
LOC100419583
SHF
SEMA6D
EID1
GALK2
MIR4716
TMOD3
ALDH1A2-AS1
RNF111
MIR1272
PIF1
MTFMT
MIR4311
CALML4
ANP32A-IT1
LRRC49
REC114
ISLR
STRA6
CYP11A1
MIR4513
MIR631
MIR4313
LINGO1-AS1
LINGO1-AS2
LINGO1
SH2D7
DNAJA4
LOC727751
LOC338963
LINC02883
MIR1276
AGBL1
NTRK3
MIR9-3HG
RHCG
ANPEP
UNC45A
FAM174B
MIR3175
LETR1
LINC02251
IRAIN
PRKXP1
PCSK6-AS1
MPG
HBZ
MIR4717
PRSS33
MIR6769A
LINC01570
TMEM114
CARHSP1
TVP23A
MIR548H2
RSL1D1
NPIPA2
MPV17L
BMERB1
RPS15A
CRYM-AS1
SNX29P1
NPIPB3
COG7
TNRC6A
KDM8
IL27
NUPR1
SULT1A2
SULT1A1
ATP2A1
LOC606724
LOC388242
MIR3680-2
MVP
TLCD3B
LOC613038
STX1B
TP53TG3D
TP53TG3
TP53TG3C
CCNYL3
TP53TG3HP
LINC02167
LOC101927272
CES1P1
CES1
GNAO1-AS1
MT1E
CCL22
DRC7
MIR6772
TEPP
LINC00920
CDH16
PLEKHG4
ZDHHC1
MIR6773
DDX19A
DDX19A-DT
SF3B3
COG4
VAC14-AS1
HYDIN
TAT-AS1
DHX38
TXNL4B
ZFHX3-AS1
MLKL
WWOX
LINC01229
MAFTRR
LINC01227
C16orf46
MIR6504
TAF1C
LOC654780
KCNG4
KIAA0513
LINC02139
MIR5093
LINC00917
FOXL1
LINC02181
KLHDC4
CA5A
BANP
LINC02182
ZC3H18-AS1
LOC100289580
LOC100287036
LOC105371430
SCARF1
SERPINF1
OR3A2
TRPV1
P2RX1
LINC01975
GGT6
C17orf114
SCIMP
RPAIN
NUP88
AIPL1
SLC16A11
ASGR2
ASGR1
MIR324
ACAP1
TMEM102
CHRNB1
CD68
SOX15
ALOX15B
BORCS6
GSG1L2
RCVRN
DNAH9
TRIM16
LINC02087
KRT17P1
TBC1D27P
TNFRSF13B
RAI1-AS1
MYO15A
TBC1D28
SNORD3B-2
MFAP4
RNF112
ALDH3A1
CCDC144CP
LOC100287072
LINC02088
CCDC144NL-AS1
CCDC144NL
LOC339260
DHRS7B
LOC105371703
PYY2
SEBOX
FOXN1
ERAL1
PIPOX
NSRP1
MIR423
LOC105371730
C17orf75
MIR632
ZNF207
SPACA3
ASIC2
SLFN11
GAS2L2
RDM1
TBC1D3I
TBC1D3H
TBC1D3F
HNF1B
TBC1D3G
MIR4727
CWC25
SNORA21
RPL23
MIR6779
ERBB2
PGAP3
GRB7
GSDMA
PSMD3
CSF3
MED24
MIR6867
RARA
RARA-AS1
GJD3
CCR7
KRT20
KRTAP2-1
KRTAP4-16
KRTAP4-5
KRT33A
KRT33B
KRT34
KRT31
KRT13
KRT15
KRT9
KRT14
HAP1
STAT5A
BECN1
MIR6781
AOC2
AOC3
TMEM106A
LINC00910
DHX8
LOC105371789
SLC4A1
CCDC43
NMT1
DCAKD
ARHGAP27
MAPK8IP1P2
STH
MIR5089
HOXB1
HOXB7
MIR196A1
PRAC2
PRAC1
MIR3185
HOXB13
B4GALNT2
MIR6165
SGCA
TMEM92
ACSF2
CACNA1G-AS1
MIR8059
ANKRD40CL
WFIKKN2
HLF
CUEDC1
MSX2P1
EPX
TSPOAP1
MIR4736
RNF43
VMP1
PTRH2
HEATR6-DT
HEATR6
INTS2
TBC1D3P2
CYB561
SMARCD2
GH1
CD79B
SCN4A
ICAM2
ARSG
PRKAR1A
LINC01152
LINC02092
DNAI2
CD300A
CD300LB
OTOP3
MRPL58
CASKIN2
SMIM6
RECQL5
LOC122455342
MXRA7
MGAT5B
SNHG20
SEC14L1
SCARNA16
MIR6516
LINC01973
LOC105371910
CEP295NL
C1QTNF1-AS1
LINC01979
MIR1268B
CARD14
NPLOC4
TSPAN10
TEX19
HEXD-IT1
CETN1
ADCYAP1
MIR4317
SNRPD1
DTNA
MIR187
MIR1539
MRO
BOD1L2
NARS1
MIR122HG
GRP
SERPINB5
RTTN
C18orf63
CNDP1
MBP
PARD6G-AS1
PRTN3
GNA15
GNA15-DT
TEKTIP1
MATK
SNORD37
CREB3L3
LRG1
MIR7-3HG
MIR7-3
CD70
C3
VAV1
RETN
PRAM1
ACTL9
ZNF266
OLFM2
ICAM4
ZGLP1
MIR1238
MIR6886
LOC105372273
ANGPTL8
MIR7974
CNN1
ZNF439
ZNF69
ZNF763
ZNF136
DHPS
GNG14
RTBDN
DNASE2
CLEC17A
ADGRE2
PGLYRP2
CYP4F24P
CYP4F11
HSH2D
USE1
PLVAP
CCDC194
BISPR
MVB12A
BST2
NIBAN3
SNORA68
GDF15
MIR3189
LRRC25
NR2C2AP
HAPLN4
ZNF14
ZNF56P
LINC00663
ZNF253
ZNF737
ZNF738
ZNF43
GOLGA2P9
ZNF723
ZNF724
LINC01224
RPSAP58
ZNF681
SLC7A9
CHST8
ZNF302
ZNF807P
LINC01801
MIR6887
GPR42
SBSN
GAPDHS
ETV2
UPK1A
PSENEN
U2AF1L4
LIN37
NPHS1
TYROBP
ZNF529-AS1
ZNF790
ZNF345
ZNF571-AS1
ZNF573
SNORD152
RASGRP4
CAPN12
LGALS7
LGALS7B
SIRT2
SARS2
SYCN
IFNL3
GMFG
FCGBP
ZNF546
AKT2
HIPK4
BCKDHA
EXOSC5
CEACAM4
CNFN
LOC101930071
LIPE-AS1
PSG8
PSG10P
PSG1
PSG6
PSG7
PSG5
PSG4
PSG9
IRGC
ZNF283
ZNF45
ZNF221
ZNF155
ZNF230-DT
ZNF223
ZNF225-AS1
ZNF234
MIR4531
APOC1
APOC1P1
GEMIN7
MARK4
RTN2
GIPR
HIF3A
PTGIR
GNG8
MIR320E
SLC1A5
SLC8A2
TPRX2
SNAR-A12
SNAR-C4
SNAR-A13
FUT2
IZUMO1
PLEKHA4
LOC101059948
CGB3
CGB5
CGB8
SLC6A16
FLT3LG
SNORD33
SNORD34
SNORD35A
FCGRT
MIR6799
MED25
IL4I1
SNAR-A14
SNAR-A5
SNAR-A6
SNAR-A7
SNAR-A9
SNAR-A10
SNAR-A11
SNAR-B1
IZUMO2
LRRC4B
SNAR-F
SNORD88B
SNORD88A
LOC105372441
KLK7
KLK14
SIGLEC9
CD33
IGLON5
VSIG10L
C19orf84
SIGLEC8
CEACAM18
SIGLEC5
HAS1
ZNF649
ZNF613
ZNF836
ZNF480
ZNF160
ZNF665
BIRC8
ZNF331
CACNG8
LILRB3
MIR4752
LAIR1
CDC42EP5
LILRA2
KIR2DL3
SHISA7
ZNF542P
AURKC
ZNF543
ZNF550
ZNF134
ZSCAN4
ZNF671
ZSCAN22
A1BG
MIR10394
SLC27A5
MIR6807
LINC01865
LOC102723730
RPS7
ALLC
LOC105373394
LINC00299
RN7SL832P
KCNF1
GREB1
MYCN
VSNL1
OSR1
HS1BP3-IT1
LDAH
TDRD15
TCF23
DNAJC5G
FTH1P3
FOSL2-AS1
TOGARAM2
EHD3
DPY30
LTBP1
GPATCH11
HEATR5B
OXER1
LINC01819
LRPPRC
PREPL
CAMKMT
LINC01121
LINC02583
EPCAM-DT
MSH2-OT1
ERLEC1
ASB3
MTIF2
MDH1
ETAA1
ANTXR1
ATP6V1B1
NAT8B
DUSP11
INO80B-WBP1
INO80B
EVA1A-AS
SNAR-H
LRRTM1
MIR6071
MIR4436A
GGT8P
NEURL3
MIR3127
AFF3
NPAS2-AS1
C2orf49
SULT1C2
MIR4265
LINC01123
MIR4267
ACOXL-AS1
ZC3H6
PSD4
CBWD2
RABL2A
RPL23AP7
EN1
C1QL2
SCTR-AS1
LINC01101
CNTNAP5
CNTNAP5-DT
CYP27C1
PROC
MYO7B
GPR17
LIMS2
SFT2D3
LINC02572
LINC01856
FAR2P1
MED15P9
POTEF
CYP4F62P
POTEJ
CYP4F30P
AMER3
RAB6D
POTEKP
RAB3GAP1
STAM2
LINC01806
SCN7A
SP9
HOXD12
HOXD9
SCHLAP1
NEUROD1
ZNF804A
AOX1
NIF3L1
PPIL3
CFLAR
NOP58
FAM237A
PLEKHM3
RPL37A
TNS1
TNS1-AS1
MIR6513
TMBIM1
MIR6810
CATIP
PLCD4
TUBA4B
SPEGNB
STK11IP
SPHKAP
SP110
SP100
ARMC9
TEX44
ALPG
PRSS56
EFHD1
LOC101928881
NGEF
IQCA1
ACKR3
MIR4441
MIR4269
MIR4786
OR6B3
OTOS
GPR35
NEU4
TRIB3
SLC52A3
SIRPB2
LOC388780
ZNF343
TMC2
IDH3B
C20orf141
TMEM239
PTPRA
GNRH2
UBOX5
GFRA4
SPEF1
PRND
TMEM230
LINC01729
MCM8
TRMT6
SNAP25
PCSK2
RBBP9
LINC00237
LOC112268271
NKX2-2
LINC00261
CST9
CST5
VSX1
FRG1BP
HM13
MYLK2
FOXS1
HCK
BPIFB3
BPIFB1
ACTL10
MIR499A
MIR499B
GDF5-AS1
GDF5
FER1L4
RBM39
AAR2
TLDC2
SRC
BPI
SNORA71D
IFT52
GDAP1L1
R3HDML
ZSWIM3
ACOT8
ZSWIM1
OCSTAMP
LOC100131496
LOC101927377
ZMYND8
LINC00494
CSE1L-DT
RIPOR3-AS1
LOC105372672
GCNT7
BMP7-AS1
LINC01742
MIR296
MIR298
EDN3
PHACTR3-AS1
MIR1257
LINC00659
SEPTIN14P20
MIR10396A
ANKRD30BP2
CYP4F29P
LOC110091776
ABCC13
MIR125B2
LINC01683
MIR155HG
JAM2
CCT8
CFAP298-TCP10L
IFNAR1
LOC101928126
LINC01426
SETD4
GET1
B3GALT5
B3GALT5-AS1
PCP4
LINC00111
LINC00112
LINC00479
TFF3
TFF2
TFF1
UBASH3A
CBS
LINC00322
KRTAP10-7
KRTAP10-11
SPATC1L
C21orf58
S100B
POTEH
GAB4
CECR3
GGT3P
CCDC188
MIR1286
RIMBP3
LOC102724751
RIMBP3C
VPREB1
GGTLC2
MIR650
LOC100652871
GSTT4
GGT1
BCRP3
CRYBB1
MIATNB
SNORD125
HORMAD2
HORMAD2-AS1
LIF
KIAA1656
LOC105372990
TCN2
PLA2G3
RNF185
MIR3928
YWHAH-AS1
AP1B1P1
ISX
MIR3909
MIR6069
APOL6
APOL4
CACNG2-DT
CACNG2
CSF2RB
IL2RB
LOC100506271
LGALS2
NOL12
GALR3
SNORA92
KCNJ4
APOBEC3A
APOBEC3B
APOBEC3B-AS1
LOC112268293
ZC3H7B
CYP2D6
CYP2D7
SCUBE1-AS1
LINC01639
EFCAB6-AS1
SHISAL1
MIR1249
LOC339685
LOC284933
MOV10L1
RPL23AP82
CIDEC
EMC3-AS1
EMC3
FANCD2
CIDECP1
VHL
ATP2B2-IT2
LINC00606
HRH1
VGLL4
TMEM40
LINC00620
TPRXL
GRIP2
CCDC174
LINC02011
UBE2E1-AS1
THRB-AS1
LRRC3B
GADL1
ARPP21
MLH1
MIR26A1
VILL
SLC22A14
ZNF620
CCK
CCDC13-AS1
KIF15
KIAA1143
MIR564
TMEM42
LZTFL1
CCRL2
CCR5AS
LTF
MYL3
MIR711
TMEM89
MIR6890
AMT
RBM6
GNAT1
HYAL1
GPR62
LINC00696
MIR135A1
ITIH3
ITIH4-AS1
SPATA12
ACOX2
FEZF2
ADAMTS9
TMF1
ARL6IP5
SAMMSON
MIR4444-2
ROBO2
NSUN3
DHFR2
LINC00879
CMSS1
RPL24
NFKBIZ
LINC01990
MORC1
GTPBP8
GAP43
LSAMP
TEX55
ARHGAP31
TMEM39A
COX17
GTF2E1
RABL3
MYLK-AS2
SLC41A3
ALDH1L1-AS1
C3orf56
LINC01471
KBTBD12
DNAJB8
GP9
ISY1-RAB43
EFCAB12
H1-8
LINC02014
SRPRB
PCCB
SOX14
LINC01210
NME9
CEP70
RNF7
ZIC1
SLC33A1
SHOX2
HTR3E-AS1
EEF1AKMT4
LINC02069
BCL6
IL1RAP
SNAR-I
LRRC15
LSG1
XXYLT1-AS1
MUC4
LINC00885
ZDHHC19
LINC02012
FYTTD1
ABCA11P
PDE6B
MSANTD1
LINC02171
CYTL1
MIR378D1
S100P
MRFAP1L1
BLOC1S4
LOC100129931
MIR4274
MIR95
SLC2A9
LINC01097
LDB2
MED28
PACRGL
WDR19
LOC401127
LINC00682
TMEM33
BEND4
GABRA2
SCFD2
AASDH
SULT1B1
UTP3
NPFFR2
CXCL5
SDAD1
COPS4
ARHGAP24
HERC6
FAM13A
MTTP
TRMT10A
LOC105377621
CXXC4
TBCK
SGMS2
ETNPPL
COL25A1-DT
COL25A1
ENPEP
ANK2
ARSJ
UGT8
TRAM1L1
TRPC3
NOCT
ANAPC10
LSM6
PRSS48
GATB
ARFIP1
TIGD4
RBM46
FSTL5
TKTL2
TRIM61
TLL1
SPOCK3
HPGD
GLRA3
LINC02427
KLKB1
FRG1
FRG1-DT
MIR4456
LINC02982
H3Y1
PRDM9
CDH6
LOC646652
UGT3A2
C5orf34
FGF10
MTREX
SLC38A9
RGS7BP
CWC27
CCNB1
GTF2H2C
GTF2H2B
CARTPT
LOC340090
NSA2
GFM2
ZBED3
AP3B1
BHMT
TENT2
CMYA5
ZFYVE16
RASGRF2-AS1
CKMT2
CKMT2-AS1
VCAN
TMEM161B-DT
TMEM161B
NR2F1-AS1
NR2F1
RIOK2
LINC02113
GUSBP19
PPIP5K2
GIN1
TSSK1B
KCNN2
TRIM36
PGGT1B
CDO1
LVRN
LINC02148
PRDM6
MEIKIN
IL3
CSF2
HSPA4
VDAC1
CDKN2AIPNL
TRPC7-AS1
KIF20A
BRD8
SMIM33
EIF4EBP3
SRA1
HARS2
TAF7
PCDHGB4
PCDHGB5
PCDHGC3
LOC729080
SH3TC2-DT
MIR584
SH3TC2
IL17B
CARMN
SLC26A2
CD74
MYOZ3
RBM22
CCDC69
GLRA1
UBLCP1
RARS1
C5orf58
KCNIP1-OT1
KCNMB1
LINC01944
MIR5003
THOC3
CDHR2
DBN1
LOC105377752
GMCL2
AACSP1
HUS1B
SERPINB9P1
LOC101927759
HTATSF1P2
LINC02525
PRPF4B
FARS2-AS1
EDN1
GFOD1-AS1
NOL7
STMND1
SOX4
MRS2
CMAHP
SCGN
HFE
H2BC10
H3C8
ABT1
H4C9
POM121L2
ZNF184
H4C11
H4C12
ZKSCAN8
ZKSCAN8P1
ZKSCAN4
ZSCAN12
ZSCAN23
HCG14
TRIM27
ZNF311
LINC01015
GABBR1
ZFP57
HCG4
ZNRD1ASP
ABCF1
MRPS18B
PPP1R10
MIR4640
GTF2H4
MUCL3
PSORS1C1
HCP5
MICB
LTA
LOC100287329
LY6G5B
SAPCD1-AS1
SNHG32
SNORD48
SNORD52
CFB
STK19
C4B
TNXA
TNXB
EGFL8
MIR6721
RNF5
MIR6833
NOTCH4
TSBP1-AS1
HLA-DMA
HLA-DOA
MIR6873
PFDN6
MIR6834
WDR46
GRM4
SNRPC
TULP1
CDKN1A
PANDAR
CCDC167
UNC5CL
TSPO2
TREM2
TREML4
NCR2
UBR2
SLC22A7
RSPH9
LINC01512
SCIRT
C6orf141
TMEM14A
COL21A1
PRIM2
GUSBP4
DPPA5
COX7A2
HTR1E
CFAP206
MDN1
PRDM1
QRSL1
RTN4IP1
DDO
LAMA4
DSE
TPD52L1
HINT3
ECHDC1
SLC18B1
SNORD101
SNORD100
WAKMAR2
HECA
VTA1
NMBR
PEX3
FUCA2
LTV1
GRM1
TMEM242
SYNJ2-IT1
FNDC1-IT1
PNLDC1
LOC102724152
RPS6KA2-IT1
TTLL2
LINC01558
LINC01615
THBS2
LOC100128653
LOC105375131
LINC02983
MIR589
RSPH10B2
THSD7A
SCIN
POLR1F
ITGB8-AS1
SP8
STEAP1B
IL6-AS1
FAM126A
CCDC126
HOXA3
HOXA6
HOXA7
CRHR2
INMT-MINDY4
AQP1
LINC00957
MYL7
MYO1G
SEPTIN7P2
CCDC201
DDC
POM121L12
LINC01446
LANCL2
LOC650226
DKFZp434L192
MIR4283-1
LOC100287834
LOC100128885
LOC641746
ZNF138
ZNF92
LOC101929322
GTF2IRD1P1
GTF2IP23
TMEM248
TRIM50
FKBP6
MLXIPL
MIR4284
NCF1
GTF2IRD2
GTF2IRD2B
POM121C
PMS2P3
CCL26
SSC4D
STEAP4
GTPBP10
MTERF1
VPS50
GNG11
COL1A2
PON1
PON3
LMTK2
GJC3
AZGP1P1
PCOLCE
MOSPD3
TFR2
MUC3A
MIR4653
EMSLR
COL26A1
SH2B2
LOC100630923
LOC100289561
UPK3BL2
UPK3BL1
POLR2J2
DNAJC2
ORC5
[truncated: 298 more rows]

## Sheet: Liver_DAVID
Category	Term	Count	%	PValue	Genes	List Total	Pop Hits	Pop Total	Fold Enrichment	Bonferroni	Benjamini	FDR
UNIGENE_EST_QUARTILE	normal_disease_3rd	718	31.6021	1.36302e-10	PGLYRP4, PGLYRP2, CHIC1, SPAAR, PGAP3, GMFG, NEXMIF, TEX44, MRGPRG, SLC4A1, RNF112, FAR2P1, MSANTD1, CYP2D7, CREB3L3, IGLON5, LINC01502, UBASH3A, LINC02714, GNAT1, CFAP95, SDS, RPL21, SERPINF1, TEX55, SOX14, DNAAF6, CEL, CACNA2D4, FAM133A, CH25H, MYL7, ZFYVE16, PRKAR1A, TFR2, RFX4, MYL3, LINC00523, PIH1D2, PRKXP1, HOXB1, HPD, FREM2, LINC00642, ASTN1, TSPYL5, LINC00885, CELA3A, ENPEP, TPH1, TPTE2P…	1415	7605	17825	1.18932	1.03589e-08	1.03589e-08	1.02226e-08
GNF_U133A_QUARTILE	lymphomaburkittsRaji_3rd	792	34.8592	9.29108e-05	HCP5, SCT, GMFG, TMEM92, ZFYVE26, VPREB1, CYP2D6, PSMD5, AKT2, MTERF1, UBASH3A, SDS, ZNF14, CH25H, MYL7, TFR2, MYL3, RFX5, RABL3, SNORA21, HPD, CELA3A, COL13A1, SHOX2, ACTL7B, AGAP2, MTMR8, PLA2G3, GATA4, ZC3HAV1, UGT8, HSPH1, GTF2IRD2B, ZNF266, ABCA1, GPR17, SULT1B1, BHMT, NMT1, DCHS1, ZNF253, SIGLEC9, GTF2H2C, KDM8, ZNF43, ZNF45, POU5F1P3, POU5F1P4, GGTLC2, SULT1C2, CHST8, LEFTY1, RBMY1F, ZNF48…	1065	9441	13625	1.07323	0.00722118	0.00504387	0.00472055
GNF_U133A_QUARTILE	salivarygland_3rd	845	37.1919	0.00012933	HCP5, PGLYRP4, SCT, PGAP3, ZFYVE26, VPREB1, CYP2D6, PSMD5, AKT2, PSMD3, MTERF1, UBASH3A, SDS, ZNF14, CH25H, MYL7, TFR2, MYL3, RFX5, RABL3, SNORA21, HPD, CELA3A, COL13A1, SHOX2, ACTL7B, AGAP2, MTMR8, PLA2G3, GATA4, ZC3HAV1, UGT8, HSPH1, ADAMTS13, KCNMB1, GTF2IRD2B, ABCA1, GPR17, NR0B2, SULT1B1, BHMT, NMT1, DCHS1, SIGLEC9, GTF2H2C, KDM8, ZNF45, POU5F1P3, POU5F1P4, GGTLC2, SULT1C2, LEFTY1, RBMY1F, Z…	1065	10176	13625	1.06235	0.0100377	0.00504387	0.00472055
HPA_RNA_TISSUE	choroid plexus	63	2.77289	0.000171473	CLXN, SPAG17, SPEF1, WFIKKN2, H2AC19, TREM2, EFCAB12, CALML4, CFAP300, ENO4, AQP1, CATIP, GET1, CFAP43, PRND, DYNC2H1, PSENEN, DYNLT5, LAG3, CFAP95, SERPINF1, DNAJB13, DNAAF6, SLC39A12, TUBA4B, VWA5B1, PCP4, ETV3L, H2BC10, ARMC3, NME9, CFAP57, EFHC2, IQCA1, C1QA, DRC7, TPH1, STEAP1B, GDPD2, STMND1, DNAH9, RSPH9, PBXIP1, TEX26, CRHR2, POU5F1B, CCDC30, TOGARAM2, ALX4, LEFTY2, GAS2L2, KCNF1, FYB2, C…	966	443	10914	1.60673	0.0059841	0.00617303	0.00617303
UNIGENE_EST_QUARTILE	embryo_development_3rd	692	30.4577	0.000165873	PGLYRP4, PGLYRP2, CHIC1, GMFG, NEXMIF, TEX44, SLC4A1, GUSBP19, RNF112, FAR2P1, VPREB1, RNF115, ZFYVE26, MSANTD1, CYP2D7, IGLON5, SOX15, MTERF1, LINC02714, GNAT1, RNF111, ACOT8, CFAP95, RPL21, DNAAF6, CEL, FAM133A, MYL7, TFR2, RFX4, ZSCAN22, MYL3, TMEM126A, RABL3, PRKXP1, HOXB1, PPIEL, HPD, NGEF, FREM2, ASTN1, TSPYL5, LINC00885, ZNF155, PIF1, CELA3A, ENPEP, AASDH, TPTE2P3, SHOX2, ACTL7B, GATA4, A1…	1415	7894	17825	1.10429	0.0125283	0.00630318	0.00622025
UNIGENE_EST_QUARTILE	brain_normal_3rd	536	23.5915	0.000486891	PGLYRP2, CHIC1, SPAAR, NEXMIF, TEX44, YWHAH-AS1, GUSBP19, RNF112, MSANTD1, CREB3L3, SOX15, PRR20C, LINC01502, PRR20B, PRR20E, PRR20D, LINC02714, PRR20A, LOC613038, ACOT8, CFAP95, SDS, SOX14, FAM133A, CH25H, ZFYVE16, PRKAR1A, RFX4, ZSCAN22, LINC00523, PRKXP1, HPD, NGEF, LINC00642, ASTN1, TSPYL5, ZNF155, CELA3A, TPH1, TPTE2P3, SHOX2, ACTL7B, AGAP2, A1BG, TEX26, ANAPC10, TEX29, C12ORF57, UGT8, HSPH1…	1415	6024	17825	1.12086	0.0363362	0.0123346	0.0121723
GNF_U133A_QUARTILE	Liver_3rd	130	5.72183	0.000569206	PGLYRP4, PLVAP, VIPR2, CSF1, AQP6, RORC, DCAF8, AQP7, SLC4A1, CALML4, EPX, LGALS2, PSMD5, FCGRT, ANPEP, CAPN2, GGT1, HOXA6, SLC25A44, BORCS6, TNS1, RNF43, ACOT7, ENDOG, PIPOX, HNF1B, ANK2, CEL, GRIP2, PSG8, ALDH3A1, MYCN, PSG5, PSG4, PSG7, HOXB1, HOXB7, HPD, MT1E, IQCA1, ENPEP, MST1L, CASKIN2, CYTL1, TAC3, S100A14, GOT1, CYP4F11, ALOX15B, ACSF2, SLC2A9, SULT1B1, BHMT, EHD3, GLUD2, DAO, GJB1, PROC…	1065	1257	13625	1.32311	0.043439	0.0147993	0.0138507
GNF_U133A_QUARTILE	Lung_3rd	268	11.7958	0.00080894	PGLYRP4, IFITM2, PGAP3, ZMYND8, AQP7, SLC4A1, CALML4, TCL1B, EDNRB, CYP2D6, TRIM29, SOX15, ANPEP, ARFIP2, ATXN7L1, GNAT1, HOXA6, ACOT8, SDS, ENDOG, SERPINF1, RPL23, PSG1, MYO7B, GPR37L1, KNL1, HNF1A, CARHSP1, TFR2, NINJ2, SERPING1, VDAC1, TARS2, TRIB3, HOXB1, EPHA1, HOXB7, HPD, CFB, CES1, MT1E, GRB7, ANAPC15, COL13A1, SHOX2, MTTP, GATA4, CFP, MST1L, SULT1A1, C3, TRPM1, CD79B, KRT33A, SEC14L1, ADA…	1065	2888	13625	1.1872	0.0611719	0.0157743	0.0147632
GNF_U133A_QUARTILE	Cerebellum_3rd	799	35.1673	0.00123988	SCT, PGAP3, ZFYVE26, VPREB1, ISLR, CYP2D6, PSMD5, AKT2, MTERF1, UBASH3A, SDS, ZNF14, CH25H, EID1, MYL7, ZFYVE16, TFR2, MYL3, RFX5, RABL3, SNORA21, HPD, CELA3A, COL13A1, SHOX2, ACTL7B, AGAP2, MTMR8, PLA2G3, GATA4, ZC3HAV1, ADAMTS13, GTF2IRD2B, ZNF268, ABCA1, GPR17, CFAP70, NR2F1, NR0B2, SULT1B1, COL1A2, NMT1, DCHS1, ZNF253, SIGLEC9, GTF2H2C, KDM8, ZNF43, ZNF45, POU5F1P3, POU5F1P4, GGTLC2, SULT1C2,…	1065	9668	13625	1.0573	0.0922359	0.0193422	0.0181023
UNIGENE_EST_QUARTILE	liver_normal_3rd	287	12.632	0.00489627	RPL5, PGLYRP2, LRR1, FCF1, AQP7, SLC4A1, TMEM92, MAGEA9, C4B, LGALS2, CREB3L3, PSMD5, ANPEP, OXER1, UBASH3A, RNF111, MAGEA4, LOC613038, SDS, RPL21, GIN1, SERPINF1, RPL23, MYO7B, KNL1, VWA5B1, PSG8, FAM133A, MYL7, PSG4, TFR2, PSG7, ZSCAN22, MYL3, SERPING1, VDAC1, EPHA1, HOXB7, HPD, CFB, BLZF1, CES1, MT1E, CELA3A, TMEM161B, ENPEP, TPTE2P3, IGSF1, MTTP, MTMR8, GATA4, A1BG, TEX26, MAGEA9B, ANAPC10, S…	1415	3144	17825	1.14993	0.311356	0.0930291	0.091805
UP_TISSUE	Plasma	42	1.84859	0.000303373	PON3, C1QA, FCGBP, ROBO4, ENPEP, ITIH3, SERPINA1, PGLYRP2, TNXB, C1R, SERPINC1, PON1, ICAM2, A1BG, CFP, CWC27, CNDP1, SERPINA5, ASGR2, C3, C4B, CDH6, ADAMTS13, HYAL1, ANPEP, B2M, JAM2, AOC3, NTRK2, CFAP95, SERPINF1, F2, AGT, MFAP4, LRG1, PROC, LCN2, SERPING1, SP8, KLKB1, FREM2, CFB	1471	294	18482	1.79489	0.0974721	0.10254	0.10254
GNF_U133A_QUARTILE	WHOLE BLOOD_3rd	367	16.1532	0.00952396	PGLYRP4, RPL5, SPON1, VIPR2, SCT, ZMYND8, FCF1, CALML4, ANTXR1, TMEM92, ANP32A-IT1, TIAL1, TP53AIP1, ISLR, ZFYVE26, PSMD5, TRIM29, SOX15, CHEK1, MAGEA2, ARFIP1, MTERF1, ATXN7L1, GNAT1, THSD7A, SOX4, MAGEA4, TNS1, SERPINF1, PSG1, MYO7B, ARMC9, SOX14, FLT3LG, ANK2, CEL, GPR37L1, KNL1, PSG9, CPED1, STX1B, PSG8, ZFYVE16, PSG5, PSG4, TFR2, PSG7, SERPING1, VDAC1, ZNF711, MXRA7, SNORA21, HOXB7, BLZF1, Z…	1065	4239	13625	1.10762	0.525944	0.123811	0.115875
UP_TISSUE	Esophagus	20	0.880282	0.00102745	PGLYRP4, H4C9, MAGEA12, FHL1, KRT78, MAGEA9B, SLC1A5, SERPINB5, TGM1, MAGEA9, H4C14, SOX15, H4C12, PAX9, H4C11, RARA, LCN2, RHCG, LINC00696, CES1	1471	110	18482	2.28441	0.293517	0.173639	0.173639
UNIGENE_EST_QUARTILE	lung_normal_3rd	469	20.6426	0.0129182	PGLYRP4, SPAAR, GMFG, NEXMIF, TEX44, RNF112, LOC650226, MTERF1, ACOT8, CFAP95, SDS, ENDOG, RPL21, TEX55, DNAAF6, CH25H, MYL7, RFX4, ZSCAN22, MYL3, TMEM126A, RPL24, PIH1D2, SERPING1, PRKXP1, PPIEL, HPD, FREM2, ASTN1, TSPYL5, LINC00885, TPH1, ANAPC15, AASDH, SHOX2, MTMR8, A1BG, TEX26, MAGEA9B, CFP, TEX29, C12ORF57, SULT1A1, C3, XKRX, GPR17, MAPK8IP1P2, RPL23AP7, ARPP21, CFAP70, SLC16A11, GPN2, NR0B…	1415	5425	17825	1.08905	0.627747	0.196357	0.193773
UNIGENE_EST_QUARTILE	testis_normal_3rd	543	23.8996	0.0157078	HCP5, PGLYRP2, NEXMIF, TEX44, MRGPRG, TMEM92, IL4I1, FAR2P1, VPREB1, LOC650226, MSANTD1, HENMT1, PSMD5, SOX15, PSMD3, PRR20C, PRR20B, PRR20E, PRR20D, PRR20A, RNF111, CFAP95, RPL21, TEX55, DNAAF6, CACNA2D4, GANC, FAM133A, MYL7, PRKAR1A, RFX4, TMEM126A, LINC00523, LINC00524, PIH1D2, PRKXP1, HOXB1, HPD, LINC00642, ASTN1, TSPYL5, LINC00885, CLEC20A, CELA3A, TPTE2P3, SHOX2, ACTL7B, GATA4, TEX26, MAGEA…	1415	6353	17825	1.0767	0.699787	0.198965	0.196347
GNF_U133A_QUARTILE	Smooth Muscle_3rd	331	14.5687	0.0210394	RPL5, VIPR2, ZMYND8, FCF1, ICAM4, SLC4A1, ANTXR1, TMEM92, ANP32A-IT1, TP53AIP1, VPREB1, ZFYVE26, CYP2D6, PSMD5, TRIM29, AKT2, NIPAL2, CHEK1, MAGEA2, MTERF1, MYOZ3, ATXN7L1, GNAT1, THSD7A, HOXA6, MAGEA4, TNS1, PSG1, MYO7B, MRPS18B, ARMC9, FLT3LG, HNF1B, CEL, KNL1, PSG9, CPED1, STX1B, PSG8, PSG5, PSG4, TFR2, PSG7, MYL3, TARS2, ZNF711, SNORA21, BLZF1, CES1, ZNF155, ENPEP, COL13A1, GIPR, SHOX2, MTTP,…	1065	3851	13625	1.09962	0.809591	0.234439	0.219411
HPA_NORMAL_TISSUE	pituitary gland	12	0.528169	0.00418698	CHST8, GH1, ADCYAP1, SIX6, TIGD4, MYO15A, NME7, COL22A1, IGSF1, WDR19, GPR50, ZBTB8B	866	57	11043	2.68458	0.219289	0.247032	0.247032
GNF_U133A_QUARTILE	fetallung_3rd	164	7.21831	0.0360254	SCARB1, CSF2, ZMYND8, NRL, ICAM4, SLC4A1, CALML4, IL1RAP, LOC729080, CYP2D6, FCGRT, PPIP5K2, CLP1, SOX15, ANPEP, NIPAL2, CCRL2, CAPN2, ARFIP1, HLA-DOA, GGT1, HOXA6, TNS1, RPL21, CD300A, SERPINF1, PIPOX, PCOLCE, CEL, TFR2, H4C14, ARMCX5, RFX5, H4C12, PMS2P3, H4C11, SERPING1, KIF20A, HOXB1, EPHA1, HPD, CFB, SRSF8, MT1E, PFKFB1, CELA3A, INO80B, IGSF1, MTTP, UBR2, LTBP1, MST1L, KIR2DL3, POU5F1B, SOCS…	1065	1832	13625	1.14526	0.942837	0.31222	0.292206
GNF_U133A_QUARTILE	Uterus_3rd	220	9.6831	0.0333384	PGLYRP4, RPL5, VIPR2, ZMYND8, AQP6, FCF1, ANTXR1, TMEM92, ANP32A-IT1, MAGEA9, TP53AIP1, ISLR, VPREB1, ZFYVE26, EDNRB, TRIM29, MAGEA2, MTERF1, MYOZ3, THSD7A, MAGEA4, HERC6, ZNF160, PSG1, ARMC9, KNL1, ZNF14, PSG9, PSG8, CH25H, PSG4, PSG7, PSG6, RABL3, ZNF711, TRIM16, HOXB7, CFB, BLZF1, ZNF155, ENPEP, COL13A1, CES1P1, SHOX2, GATA4, MAGEA9B, TRPM1, ARSJ, ZSCAN12, KCNN2, ABCA1, RPL23AP7, H4C9, FER1L4,…	1065	2511	13625	1.12089	0.928975	0.31222	0.292206
GNF_U133A_QUARTILE	atrioventricular node_3rd	116	5.10563	0.0461444	ZNF331, PGLYRP4, FCGBP, SCARB1, PLVAP, SPON1, VIPR2, CSF1, STK19, TMEM92, TP53AIP1, CDH6, RGS5, ZFYVE26, PSMD5, TMEM14A, B2M, HOXA6, TNS1, CHRNB1, ARMC9, HNF1B, PCOLCE, GRIP2, PSG9, ARMCX3, PSG5, PSG6, RAB38, NUPR1, MXRA7, HOXB7, CES1, MT1E, PFKFB1, SLC26A2, SLC41A3, MTMR8, TMEM242, SOCS2, SULT1A1, C3, EFNB1, SEC14L1, CYP11A1, CASKIN2, EIF4EBP3, KCNN2, MORC1, RAI2, ABCA1, GNG11, NR0B2, ALOX15B, A…	1065	1268	13625	1.17038	0.974902	0.359926	0.336854
HPA_RNA_TISSUE	fallopian tube	39	1.71655	0.0229752	CLXN, ZCCHC12, DRC7, SPEF1, TCF23, STMND1, DNAH9, RSPH9, CFAP206, EFCAB12, CFAP300, SMIM6, ENO4, ADGRG4, CATIP, TOGARAM2, HOXC5, CFAP43, HOXA6, GAS2L2, RSPH10B2, DYNLT5, FYB2, DNAI2, CFAP95, C21ORF58, RABL2A, DNAJB13, DNAAF6, C1ORF87, PRSS33, CFAP157, TUBA4B, ARMC3, NME9, CFAP57, EFHC2, NUP62CL, LGR5	966	309	10914	1.42598	0.556703	0.413554	0.413554
CGAP_SAGE_QUARTILE	166:skin_melanoma_3rd	84	3.69718	0.00123499	PCSK2, CCDC144CP, CCDC167, ZNF253, DYRK4, HCP5, MTFMT, MRE11, TXNL4B, SPEF1, CALML5, FCF1, RORC, KLHL35, CSTF3-DT, CA5A, PRR20C, PRR20B, PRR20E, PRR20D, LGALS7, PRR20A, BCKDHA, GPX2, AREL1, LINC02591, DCAKD, PIPOX, LOC100289561, TMEM40, GPR37L1, VWA5B1, GANC, TEX19, LOC343052, PLPP7, ZNF542P, TBC1D2, FRG1, PMS2P3, PPIEL, ZNF234, PFDN6, IFNAR1, PIF1, LRRC15, SMARCD2, ITIH3, TNXB, TNXA, DHX8, SLC41…	1275	755	16134	1.40788	0.348715	0.428543	0.428543
CGAP_EST_QUARTILE	501:liver_normal_3rd	17	0.748239	7.88806e-05	ITIH3, SERPINA1, SPRYD4, SERPINC1, AZGP1P1, SERPINF1, SEBOX, APOA1, APOC3, CYP4F11, C3, C4B, ACOX2, APOC1, SERPING1, CFB, APOC1P1	1302	69	16356	3.09504	0.363297	0.451355	0.451355
GNF_U133A_QUARTILE	Pons_3rd	462	20.3345	0.0656706	PGLYRP4, RPL5, SCT, H2AC19, DCAF8, SLC4A1, YWHAH-AS1, TMEM92, H2AC18, ISLR, ZFYVE26, CYP2D6, PSMD5, AKT2, HOXA3, MTERF1, GNAT1, RNF111, ACOT8, RPL21, ARMC9, SOX14, CEL, CPED1, EID1, CH25H, ZFYVE16, PRKAR1A, TFR2, RFX5, RPL24, TARS2, HOXB1, SNORA21, CFB, ASTN1, TSPYL5, ENPEP, TPH1, SHOX2, MTMR8, MAGEA9B, CFP, POU5F1B, KCNMB1, HOXC5, NKX2-2, GPR17, MAPK8IP1P2, ST18, GLUD2, GJB4, TOLLIP, PAH, NMT1, …	1065	5600	13625	1.05546	0.995	0.465664	0.435814
CGAP_EST_QUARTILE	31450:uncharacterized tissue_uncharacterized histology_3rd	19	0.836268	0.000163929	IL6-AS1, GABRA2, PON3, CHRNB1, CSF3, PTGIR, DDC, STEAP1B, PON1, ICAM2, HTR3A, PTGS1, TNFRSF1A, SULT1C2, ALDH3A1, TCN2, CCKBR, CYP11A1, PCCB	1302	88	16356	2.7123	0.608686	0.469001	0.469001
GNF_U133A_QUARTILE	Amygdala_3rd	240	10.5634	0.0722945	HCP5, RPL5, SPON1, ZMYND8, AQP6, FCF1, AQP7, CALML4, ANTXR1, TMEM92, TIAL1, TP53AIP1, PSMD5, AKT2, CHEK1, ARFIP1, MTERF1, ATXN7L1, THSD7A, HOXA7, HOXA6, TNS1, COG7, ZNF160, IFRD1, PSG1, ARMC9, CEL, KNL1, PSG8, PSG4, TFR2, PSG7, ZNF711, MXRA7, HOXB1, SNORA21, HOXB7, CFB, BLZF1, MT1E, ASTN1, ZNF155, ENPEP, GIPR, CES1P1, IGSF1, SHOX2, AGAP2, MTMR8, GATA4, ZC3HAV1, C3, POU5F1B, SEC14L1, ZSCAN12, KCNN…	1065	2818	13625	1.08958	0.997129	0.469914	0.439792
HPA_RNA_TISSUE	intestine	100	4.40141	0.0406025	FCGBP, FCMR, SH2D7, SCT, PRDM6, RXFP4, CALML4, TMEM92, LGALS2, CAPN9, CREB3L3, ANPEP, RNF43, NKX6-3, UNC5CL, C11ORF86, SEMA6D, MYO7B, HNF1A, MUC3A, ACAP1, OMP, TMEM139, SLC26A2, ENPEP, TPH1, EPHA10, MTTP, FUT2, HOXB13, ADGRG4, CNN1, SCIN, CALD1, KCNMB1, VILL, B4GALNT2, SULT1A2, GPR17, NIBAN3, GGT6, ANKRD40CL, SLC52A3, CLEC17A, B3GALT5, CYP4F11, NR0B2, ISX, SULT1B1, RNF186, APOBEC3B, PRAC1, ACY3, …	966	946	10914	1.19431	0.765604	0.48723	0.48723
GNF_U133A_QUARTILE	Hypothalamus_3rd	267	11.7518	0.0857575	IFITM2, PGAP3, ZMYND8, ICAM2, AQP7, PKD2L1, ISLR, VPREB1, CYP2D6, TRIM29, ATXN7L1, HOXA7, HOXA6, LGALS7, TNS1, ACOT8, ENDOG, RPL23, COG4, PSG1, MYO7B, MRPS18B, ARMC9, FLT3LG, CEL, HNF1A, PSG9, PSG8, MYL7, PSG4, PSG7, MYL3, SERPING1, TARS2, HOXB1, TRIM16, BLZF1, CES1, ZNF155, ENPEP, ANAPC15, COL13A1, SHOX2, MTTP, GATA4, CFP, SULT1A1, CD79B, SEC14L1, KCNN2, SULT1A2, ABCA1, H4C9, DTNA, CRADD, GREB1,…	1065	3168	13625	1.07823	0.999082	0.514545	0.481562
HPA_NORMAL_TISSUE_CELLTYPE	hair; cells in cortex/medulla	7	0.308099	0.00442857	KRT33B, KRT33A, GSDMA, GJB4, KRT34, KRT31, KRTAP2-1	866	21	11043	4.25058	0.652274	0.526999	0.526999
HPA_NORMAL_TISSUE_CELLTYPE	pituitary gland; cells in anterior	12	0.528169	0.00418698	CHST8, GH1, ADCYAP1, SIX6, TIGD4, MYO15A, NME7, COL22A1, IGSF1, WDR19, GPR50, ZBTB8B	866	57	11043	2.68458	0.631603	0.526999	0.526999
UP_TISSUE	Corpus callosum	22	0.96831	0.00492842	RPAIN, NTRK2, STEAP1B, H4C9, CCDC126, TIMM23, PLD4, CFLAR, RNF7, MLH1, C6ORF141, CNDP1, HCK, GJC3, H4C14, H4C12, SPOCK3, H4C11, MBP, HIF1AN, CARS1, SLC18B1	1471	144	18482	1.91954	0.811739	0.555269	0.555269
HPA_RNA_TISSUE	kidney	51	2.24472	0.0685008	ACY3, AQP6, KLHDC7A, SSC4D, TSPAN12, CDH6, SULT1C2, LGALS2, EFHD1, THSD7A, GGT1, UNC5CL, AVPR2, PIPOX, HNF1B, HNF1A, SLC7A9, TMEM139, CDH16, FREM2, TMEM106A, ATP6V1B1, GRB7, DDC, ENPEP, PLPPR1, MRO, SMIM6, SCIN, BSND, AOC1, GLYATL1, DMRT2, GDF15, FMO1, FMO4, PDZK1IP1, ARHGAP24, ACSF2, SLC2A9, BHMT, DAO, NPHS1, TCN2, NEURL3, XPNPEP2, PAH, GLOD5, RNF183, SLC22A8, HOXD9	966	458	10914	1.25809	0.916558	0.616507	0.616507
UP_TISSUE	Bile	7	0.308099	0.00777905	GGTLC2, FCGBP, SERPINA1, SERPINC1, ANPEP, LCN2, GGT1	1471	23	18482	3.8239	0.92861	0.65733	0.65733
UNIGENE_EST_QUARTILE	trachea_normal_3rd	286	12.588	0.065783	HCP5, CHIC1, PGAP3, NEXMIF, ZMYND8, TMEM92, AQP1, EDNRB, TRIM29, NIPAL2, ARFIP2, EPC1, ARFIP1, HMCN1, RNF111, HERC6, COG3, TEX55, ARMC9, GOLPH3L, GTPBP8, CACNA2D4, CPED1, PLPP7, ZNF542P, ZFYVE16, LOC727751, PRKAR1A, PIH1D2, SPIN2B, ZNF711, VSIG10L2, TRIM16, PPIEL, EPHA1, CFB, CES1, ASTN1, TMEM161B, ENPEP, DHX8, AASDH, IGSF1, FRG1JP, ZC3HAV1, GMCL2, HSPH1, NUP88, ZNF268, BANP, STAT5A, FYB2, CFAP70…	1415	3317	17825	1.08616	0.994324	0.714216	0.704818
UP_TISSUE	Spleen	91	4.00528	0.0126645	ARHGAP9, HCP5, PLVAP, FCMR, NCF1, TNFRSF13B, PGAP3, FAM13A, ICAM2, AFF3, GIMAP8, IL4I1, SGCA, HYAL1, CNTRL, CCRL2, ARL6IP5, ZNF724, SLC25A45, ZFP37, HERC6, H3C8, PLEKHG4, HBZ, LEFTY1, LAG3, RPL21, RPS7, SP110, ZNF160, MYO7B, FLT3LG, CACNA2D4, CYP7B1, GANC, VAV1, AGAP9, ZNF542P, HCK, HSH2D, SLFN11, TRIM17, H2BC10, SPATA13, CDH16, ZNF234, LTF, C1QA, SP100, TMEM161B, GDPD2, CFP, CD79B, H3C15, MSTO1,…	1471	896	18482	1.27606	0.986539	0.856123	0.856123
CGAP_SAGE_QUARTILE	91:peritoneum_normal_3rd	129	5.67782	0.0115627	CCDC144CP, ZNF331, MYLK2, MTFMT, CSF3, STEAP4, CSF3R, TXNL4B, CD81, ICAM2, RORC, CWC27, AQP1, RGS5, ZFYVE26, HENMT1, FCGRT, MYC, MYOZ3, COG7, COG4, IRAG1, FLT3LG, PIPOX, PCOLCE, GPR37L1, DGKZ, GANC, CH25H, ACAP1, TYROBP, SLFN11, AIPL1, PPIEL, CES1, LINC01973, RTN2, SLC26A2, STEAP1B, AGAP2, PLA2G3, CFP, SOCS2, SULT1A1, C3, CNN1, HSPH1, CALD1, ARSJ, OCSTAMP, CMYA5, CACNA1S, ZNF543, AAR2, GPR17, GGT…	1275	1337	16134	1.22093	0.982326	1	1
CGAP_EST_QUARTILE	23617:thyroid_normal_3rd	5	0.22007	0.0924192	SERPINF1, RPL37A, CFLAR, FTH1P3, BEST1	1302	22	16356	2.85505	1	1	1
HPA_NORMAL_TISSUE_CELLTYPE	skin 2; cells in corneal layer	17	0.748239	0.073092	COX17, KRT13, CNFN, SBSN, KLK7, SERPINB5, TGM1, IL4I1, OS9, APEX1, KRT15, CEP70, NFKBIZ, TMEM119, CCR7, S100A14, RHCG	866	138	11043	1.57087	1	1	1
HPA_NORMAL_TISSUE	hair	8	0.352113	0.0715048	KRT33B, KRT33A, GSDMA, GJB4, KRT15, KRT34, KRT31, KRTAP2-1	866	47	11043	2.17051	0.98744	1	1
CGAP_EST_QUARTILE	20092:testi_normal_3rd	5	0.22007	0.0693075	ZNF542P, NOL7, SLC25A44, ASB3, RNF111	1302	20	16356	3.14055	1	1	1
CGAP_EST_QUARTILE	21435:uncharacterized tissue_neoplasia_3rd	8	0.352113	0.0696121	SEC14L1, ANPEP, TLDC2, LAPTM5, LCN2, PRTN3, ARAP1, LTF	1302	46	16356	2.18473	1	1	1
CGAP_EST_QUARTILE	16275:uncharacterized tissue_uncharacterized histology_3rd	3	0.132042	0.0764695	ATP2B4, MXRA7, TNS1	1302	6	16356	6.28111	1	1	1
CGAP_EST_QUARTILE	19346:brain_neoplasia_3rd	5	0.22007	0.0693075	SP100, PDE4DIP, MBP, FTH1P3, BEST1	1302	20	16356	3.14055	1	1	1
CGAP_EST_QUARTILE	19739:prostate_normal_3rd	5	0.22007	0.0693075	ROBO2, UGT8, WWOX, PPP2R5E, NRXN3	1302	20	16356	3.14055	1	1	1
CGAP_EST_QUARTILE	27163:colon_normal_3rd	5	0.22007	0.0693075	ATP5F1B, EPHA10, RBM19, TACC1, MUC4	1302	20	16356	3.14055	1	1	1
CGAP_EST_QUARTILE	21295:lung_normal_3rd	15	0.660211	0.0682397	ZNF331, RPL5, SMARCD2, TNXB, TNXA, C1R, NONO, CFLAR, ZNF45, BCL6, PITPNM2, MTREX, MXRA7, LINC01278, STAM2	1302	114	16356	1.65292	1	1	1
CGAP_EST_QUARTILE	21649:brain_neoplasia_3rd	16	0.704225	0.0712525	IL6-AS1, MACF1, STEAP1B, TNXB, PCDHGB5, TNXA, PCDHGB4, SEMA6D, PCDHGC3, PDE4DIP, NBPF11, RNF115, GNA15, PIR, MBP, MRRF	1302	125	16356	1.60796	1	1	1
CGAP_EST_QUARTILE	21056:colon_normal_3rd	3	0.132042	0.0764695	COL1A2, PLEKHA6, MUC4	1302	6	16356	6.28111	1	1	1
UP_TISSUE	Colon	114	5.01761	0.0774146	RPL5, PGAP3, HFE, RORC, CALML4, LGALS2, NARS1, TRIM29, MTERF1, RNF111, TNS1, UNC5CL, ACOT7, RPL21, GIN1, MUCL3, HNF1B, CEL, GANC, RPL24, CARD14, CFB, INO80B, GIPR, SLC41A3, MTMR8, TRMT2B, FUT2, PSORS1C1, SULT1A1, SCFD2, TMEM248, CYTL1, GTF2IRD2B, SULT1A2, GGT6, CRADD, GTF2IRD2, VTA1, ANKRD40CL, LIF, GLMP, ISG15, B3GALT5, ERAL1, CYP4F11, ZWINT, CIDEC, DAO, PROC, GPR182, SRPRB, ALPG, RNF185, SLC22A…	1471	1251	18482	1.14494	1	1	1
CGAP_EST_QUARTILE	607:uncharacterized tissue_uncharacterized histology_3rd	3	0.132042	0.0764695	ARHGEF25, RBM19, DTX3	1302	6	16356	6.28111	1	1	1
UP_TISSUE	Serum	5	0.22007	0.0924155	C3, PGLYRP2, APOA1, PRTN3, AGT	1471	22	18482	2.85551	1	1	1
CGAP_EST_QUARTILE	40158:kidney_normal_3rd	16	0.704225	0.0925664	SLC35A2, GLYATL1, PIPOX, FMO1, SLC2A5, ACSF2, AQP1, KBTBD12, BHMT, OS9, HYAL1, DMRTA1, PSMD3, SLC22A8, SLC22A7, ATP6V1B1	1302	130	16356	1.54612	1	1	1
UP_TISSUE	Blood	71	3.125	0.0916641	MRS2, SERPINA1, CSF3R, TSSK1B, STK19, SLC4A1, EPX, AQP1, C4B, SIX6, CYP2D6, AKT2, MAGEA1, MAGEA2, UBASH3A, UTY, PRND, MAGEA4, H3C8, RIPK3, CD300A, DHPS, GTPBP8, HTR3A, CACNA2D4, F2, APBB1IP, DNAJC2, VCAN, PCCB, RARA, SERPING1, RDH5, PFDN5, CFB, PIGH, CES1, LTF, ITIH3, SERPINC1, HM13, AGAP2, COX7A2, FUT2, LTBP1, KIR2DL3, PRAM1, PSORS1C1, OSGEP, TMEM242, SULT1A1, KIAA0513, ADAMTS13, SEC14L1, CD300L…	1471	751	18482	1.18783	1	1	1
CGAP_EST_QUARTILE	38098:kidney_uncharacterized histology_3rd	32	1.40845	0.0911672	LTV1, ZNF155, AQP7, TSPAN12, AQP1, SOCS2, NARS1, BSND, ANKRD49, GLYATL1, GGT6, GOT1, UTP3, DMRT2, AMT, PIPOX, FMO1, GTPBP8, QRSL1, C1QL3, ARHGAP24, ACSF2, BHMT, NPHS1, TCN2, SLC7A9, PEX3, TACC1, SLC22A8, GALK2, PFDN6, ATP6V1B1	1302	304	16356	1.32234	1	1	1
HPA_NORMAL_TISSUE_CELLTYPE	appendix; enterocytes - Microvilli	23	1.01232	0.065737	CLXN, SLC26A2, UNC5CL, ACY3, APOA1, SGMS2, CALML4, KRT20, HAPLN4, DDO, SULT1A1, VCAN, CAPN9, SCIN, SLC7A9, ANPEP, CDHR2, TLDC2, TMEM119, TFF2, VILL, S100A14, SULT1A2	866	200	11043	1.46645	1	1	1
CGAP_EST_QUARTILE	11345:thyroid_neoplasia_3rd	7	0.308099	0.0944576	C3, MED24, TNXB, CHEK2P2, TNXA, DHX8, MYC	1302	40	16356	2.19839	1	1	1
CGAP_EST_QUARTILE	23729:genitourinary_normal_3rd	3	0.132042	0.0764695	HSPB7, SERPING1, CARS1	1302	6	16356	6.28111	1	1	1
CGAP_EST_QUARTILE	21842:placenta_normal_3rd	11	0.484155	0.0893804	PSG8, HAX1, PSG4, PPP2R5E, GAS6-AS1, PSG7, PSD4, TBC1D3F, MAGEA4, BANP, TBC1D3H	1302	78	16356	1.77159	1	1	1
CGAP_EST_QUARTILE	16161:stomach_normal_3rd	7	0.308099	0.0857583	C3, SP100, RBM25, CALD1, TMEM33, NSRP1, MARK3	1302	39	16356	2.25476	1	1	1
CGAP_EST_QUARTILE	11015:colon_neoplasia_3rd	13	0.572183	0.0831111	ABCA1, MTFMT, HFE, GLMP, MRPS21, SERPINB5, POLR3B, HEATR5B, UBN2, ZNF737, RPL37A, EIF3H, GBP2	1302	97	16356	1.6836	1	1	1
CGAP_EST_QUARTILE	21686:brain_neoplasia_3rd	12	0.528169	0.0784089	TRPM1, MACF1, BCL6, CAPN2, PDE4DIP, EFHD1, GPR37L1, AFF3, ITFG2, FTH1P3, VGLL4, BEST1	1302	86	16356	1.75287	1	1	1
CGAP_EST_QUARTILE	40089:mammary gland_normal_3rd	12	0.528169	0.0784089	BCKDHA, BHMT, SDS, PGLYRP2, KDM8, PCCB, SEBOX, SERPING1, A1BG, AGT, SERPINA5, CES1	1302	86	16356	1.75287	1	1	1
CGAP_EST_QUARTILE	11060:colon_neoplasia_3rd	11	0.484155	0.0779776	LINC00839, TOR1A, SF3B3, VSNL1, COX17, ARMC9, DMD, NSRP1, FTH1P3, FREM2, BEST1	1302	76	16356	1.81821	1	1	1
UP_TISSUE	Astrocytoma	4	0.176056	0.0944726	TRIM29, RFX4, CAPN2, IKBKG	1471	14	18482	3.58978	1	1	1
HPA_NORMAL_TISSUE	endometrium	15	0.660211	0.0859147	CLXN, SLC26A2, ENPEP, PLVAP, DNAI2, CFAP70, FHL1, CTSW, C1ORF87, AQP1, CNN1, VCAN, CALD1, IL2RB, CD68	866	120	11043	1.59397	0.995009	1	1
UP_TISSUE	Pancreas	89	3.91725	0.0909287	MPG, CTSW, HIF3A, CFAP300, ZDHHC1, GGTLC2, SCGN, RNF115, SGCA, HYAL1, ANPEP, CCRL2, PSMD3, CAPN2, RTTN, GGT1, SLC25A45, HBZ, LEFTY1, PTGIR, EDN1, CDADC1, RPL21, DCAKD, OSR1, AP3B1, CEL, ARAP1, H2BC18, PABIR3, CPED1, ALDH3A1, GPRIN2, DPM3, MYL7, CDC42EP5, RPL37A, PCCB, TMBIM1, NUPR1, LDAH, PFDN6, CELA3A, HPGD, GIPR, LAMA4, PBXIP1, MOSPD3, LILRA2, APOL4, GJC3, CALD1, KCNMB1, MVB12A, VILL, S100A14, …	1471	962	18482	1.16239	1	1	1
CGAP_EST_QUARTILE	38261:eye_uncharacterized histology_3rd	11	0.484155	0.0417148	ALDH3A1, SLC26A2, TEX55, RABL3, TRIM36, THOC3, C2ORF49, PRKXP1, KCNN2, OTUD3, MPZL2	1302	68	16356	2.03212	1	1	1
CGAP_EST_QUARTILE	23996:uncharacterized tissue_uncharacterized histology_3rd	14	0.616197	0.0646587	H3C8, CWC25, FTH1P3, BEST1, RBM3, EID1, H3C15, LGALS2, BCL6, PRKAR1A, H3C14, TACC1, B2M, RTRAF	1302	103	16356	1.70749	1	1	1
CGAP_EST_QUARTILE	19183:head and neck_neoplasia_3rd	3	0.132042	0.0340373	DYNC2H1, SFPQ, COG7	1302	4	16356	9.42166	1	1	1
UP_TISSUE	Glioma	3	0.132042	0.0340348	POU5F1P3, POU5F1P4, BEST1	1471	4	18482	9.42318	0.999992	1	1
CGAP_EST_QUARTILE	40296:uncharacterized tissue_uncharacterized histology_3rd	18	0.792254	0.0306569	RPL5, RAB6D, C1R, LRRC49, PDE4DIP, CLEC14A, PYGM, WDR46, GANC, ZNF542P, MOV10, MED24, OS9, DGLUCY, CAPN2, ZNF613, RNF185, ZNF385A	1302	131	16356	1.72611	1	1	1
HPA_NORMAL_TISSUE_CELLTYPE	testis; preleptotene spermatocytes	171	7.52641	0.0292773	MRE11, MPG, LRR1, CPNE6, H2AC19, CWC25, KLHL35, H2AC18, ALKBH3, ZFYVE26, CLP1, SNRPD1, MAGEA1, ZNF207, ATXN7L1, TMEM14A, HOXA6, ISY1-RAB43, SUPT16H, KNL1, VWA5B1, LZTFL1, GPRIN2, CARHSP1, NIF3L1, ACAP1, TRIM17, FANCD2, H4C14, RFX4, RFX5, H4C12, TMEM126A, H4C11, ZNF711, SNRPC, STAM2, AJUBA, FKBP6, BLZF1, SRSF8, MT1E, TSPYL5, ZCCHC8, RNASEH2C, PIF1, CSTF3, COX17, ACTL7B, DTX4, GTF2E1, RPF1, LDHC, C…	866	1903	11043	1.14585	0.999151	1	1
CGAP_EST_QUARTILE	40318:uteru_uncharacterized histology_3rd	27	1.18838	0.0286533	PPP1R15B, FHL1, GPATCH2L, WDR46, SOCS2, SEC14L1, OS9, ARL6IP5, CAPN2, PRND, AOC3, PLEKHG4, SGIP1, NONO, COG3, HNF1B, PCOLCE, MOB3B, TNFRSF1A, EID1, PRKAR1A, NACA, P2RX1, SERPING1, VDAC1, HAP1, ZNF134	1302	221	16356	1.53475	1	1	1
CGAP_EST_QUARTILE	19822:uncharacterized tissue_neoplasia_3rd	5	0.22007	0.0267419	FAM25BP, DYNC2H1, SFPQ, NACA, FAM25A	1302	15	16356	4.1874	1	1	1
CGAP_EST_QUARTILE	40200:liver_normal_3rd	15	0.660211	0.0266622	PON3, ITIH3, HLF, C1R, SEBOX, PIPOX, A1BG, AGT, SERPINA5, NEU4, PROC, CYP2D7, SERPING1, SLC22A7, CFB	1302	100	16356	1.88433	1	1	1
CGAP_EST_QUARTILE	19258:cerebrum_normal_3rd	5	0.22007	0.0208975	DYNC2H1, UNC45A, ATP5F1B, ZNF302, LDAH	1302	14	16356	4.4865	1	1	1
CGAP_EST_QUARTILE	11067:colon_neoplasia_3rd	4	0.176056	0.0207469	C3, TNXB, TNXA, KRT20	1302	8	16356	6.28111	1	1	1
CGAP_EST_QUARTILE	16254:ovary_neoplasia_3rd	7	0.308099	0.0144567	UNC45A, RNF43, NARS1, OS9, NONO, EGFL8, B2M	1302	26	16356	3.38213	1	1	1
CGAP_EST_QUARTILE	38079:muscle_normal_3rd	43	1.89261	0.0125322	ZNF550, ENY2, TMF1, TXNL4B, DHX8, C1R, CWC25, PBXIP1, CWC27, EFNB1, SEC14L1, SGCA, ZMYM3, CA3, ARFIP2, GET1, SLC35A2, RBM39, CHRNB1, RAB6D, H4C9, CAV1, NONO, SLC33A1, PDE4DIP, PCOLCE, MLH1, NPM3, MFAP4, TBCK, NSA2, KBTBD6, CDKN2AIPNL, H4C14, DLC1, ZNF439, H4C12, PIR, H4C11, COL21A1, PPIL3, BLZF1, CCL26	1302	370	16356	1.45993	1	1	1
CGAP_EST_QUARTILE	40562:uncharacterized tissue_uncharacterized histology_3rd	15	0.660211	0.0113565	ITIH3, C1R, SERPINC1, NONO, PIPOX, AGT, DEPP1, BHMT, APOL6, TFR2, PSMD3, SERPING1, VDAC1, CFB, CES1	1302	90	16356	2.0937	1	1	1
CGAP_EST_QUARTILE	21240:kidney_neoplasia_3rd	14	0.616197	0.00586568	LTV1, WWOX, PRCC, PDE4DIP, ARAP1, FTH1P3, LRPPRC, BEST1, SFPQ, EFHD1, CARS1, KLKB1, B2M, RUNX1T1	1302	75	16356	2.34495	1	1	1
CGAP_EST_QUARTILE	37954:uncharacterized tissue_uncharacterized histology_3rd	13	0.572183	0.00473919	LINC02870, H4C9, CCDC197, CALCB, TEX12, USE1, C20ORF141, TMEM230, H4C14, H4C12, H4C11, LTA, ZNF684	1302	65	16356	2.51244	1	1	1
CGAP_EST_QUARTILE	29989:liver_normal_3rd	16	0.704225	0.00268503	SERPINA1, SDS, C1R, CD81, SEBOX, APOA1, A1BG, ERAL1, AGT, DEPP1, SULT1A1, GJB1, VDAC1, HPD, CES1, MT1E	1302	85	16356	2.36465	1	1	1
CGAP_EST_QUARTILE	40263:head and neck_normal_3rd	16	0.704225	0.0341021	CAV1, FHL1, WFIKKN2, HSPB7, PDE4DIP, CLEC14A, PYGM, ZNF45, SERPINB5, AQP1, TNFRSF1A, TGM1, PLPP7, DGLUCY, TAF7, MYOZ3	1302	113	16356	1.77872	1	1	1
CGAP_EST_QUARTILE	16672:mammary gland_normal_3rd	14	0.616197	0.0646587	ZNF155, TMEM161B, TOR1A, TUFT1, ITPK1, CFLAR, OSGEP, PTGS1, C3, SFPQ, SEC14L1, ARL6IP5, IDS, METTL15	1302	103	16356	1.70749	1	1	1
CGAP_EST_QUARTILE	20572:placenta_normal_3rd	11	0.484155	0.0348782	GRB7, CSF3R, TNXB, COL1A2, TNXA, CGB8, CGB5, SIRPB2, PLEKHA6, DCHS1, CGB3	1302	66	16356	2.0937	1	1	1
CGAP_EST_QUARTILE	11328:head and neck_neoplasia_3rd	6	0.264085	0.0376454	STIL, PPIP5K2, MYC, DLC1, XIAP, UBR2	1302	24	16356	3.14055	1	1	1
CGAP_EST_QUARTILE	11556:stomach_neoplasia_3rd	6	0.264085	0.0588087	C3, RPL5, COG7, PPP1R10, RPL37A, SERPING1	1302	27	16356	2.7916	1	1	1
CGAP_EST_QUARTILE	19818:uncharacterized tissue_neoplasia_3rd	3	0.132042	0.0537669	RIPK3, PPIL3, B2M	1302	5	16356	7.53733	1	1	1
UP_TISSUE	Uterus endothel	3	0.132042	0.0537626	SEC14L1, POLR3B, SERBP1	1471	5	18482	7.53855	1	1	1
CGAP_EST_QUARTILE	40213:heart_uncharacterized histology_3rd	16	0.704225	0.0534673	NOP58, GOT1, C1R, NONO, FHL1, HSPB7, AMT, AGT, RSL1D1, H2BC21, ZNF207, SERPING1, TAF7, EGFL8, RNF185, BANP	1302	120	16356	1.67496	1	1	1
CGAP_EST_QUARTILE	27192:uncharacterized tissue_neoplasia_3rd	4	0.176056	0.0510998	ARHGAP9, CDADC1, HM13, LTF	1302	11	16356	4.56808	1	1	1
CGAP_EST_QUARTILE	10977:colon_neoplasia_3rd	4	0.176056	0.0510998	DAD1, POLR1F, FTH1P3, BEST1	1302	11	16356	4.56808	1	1	1
UP_TISSUE	Mammary cancer	15	0.660211	0.0471297	SP100, CCNT1, GABRA5, AVPR2, SLC2A5, POU5F1B, PSMD5, PPP1R8, SNCG, MAGED2, POTEF, TFF1, IKBKG, NUPR1, METTL17	1471	108	18482	1.74503	1	1	1
CGAP_EST_QUARTILE	40130:uncharacterized tissue_uncharacterized histology_3rd	9	0.396127	0.0468301	BHMT, PGLYRP2, C1R, SEBOX, SERPING1, A1BG, CFB, AGT, CES1	1302	51	16356	2.21686	1	1	1
CGAP_EST_QUARTILE	1118:brain_normal_3rd	8	0.352113	0.04603	RPL5, EHD3, RPL23, TACC1, LDAH, STAM2, FTH1P3, BEST1	1302	42	16356	2.3928	1	1	1
CGAP_EST_QUARTILE	23885:kidney_neoplasia_3rd	11	0.484155	0.0454541	MOV10, ROBO4, CRADD, BCL6, GPR35, NONO, PTCH1, DHPS, EMC3, SNURF, LMTK2	1302	69	16356	2.00267	1	1	1
CGAP_EST_QUARTILE	21807:placenta_normal_3rd	6	0.264085	0.044081	ZFYVE26, TRIM29, PDPN, TACC1, VGLL4, TNS1	1302	25	16356	3.01493	1	1	1
UP_TISSUE	Cerebrospinal fluid	9	0.396127	0.0423261	C4B, SERPINA1, LRG1, SERPINC1, SERPINF1, SERPING1, APOC3, A1BG, F2	1471	50	18482	2.26156	1	1	1
CGAP_EST_QUARTILE	39137:uncharacterized tissue_uncharacterized histology_3rd	4	0.176056	0.0944793	PTGIR, CSF2, CCRL2, CCR7	1302	14	16356	3.5892	1	1	1
CGAP_EST_QUARTILE	29988:liver_normal_3rd	24	1.05634	0.0387645	CD74, NOP58, ITIH3, SERPINA1, SDS, SERPINC1, CD81, AZGP1P1, PON1, SEBOX, APOA1, PDE4DIP, A1BG, ASGR1, AGT, NIF3L1, PROC, TAF1C, TFR2, SERPING1, NDUFAF1, HPD, CFB, MT1E	1302	196	16356	1.53823	1	1	1
UP_TISSUE	Carcinoma	9	0.396127	0.0381059	MRPL50, TPH1, RPS15A, STK11IP, TFR2, APEX1, CA9, INTS8, OSGEP	1471	49	18482	2.30772	0.999998	1	1
UP_TISSUE	Lung	238	10.4754	0.0376015	RPL5, IFITM2, GMFG, LRR1, ICAM4, TMEM92, AQP1, MAGEA9, TIAL1, ALKBH3, EDNRB, CLP1, PSMD3, ARFIP2, MYOZ3, ISY1-RAB43, SDS, SP110, DNAAF6, ZNF14, CH25H, ZFYVE16, NINJ2, SPATA13, VDAC1, TARS2, CES1, MT1E, GRB7, MACF1, GATA4, MAGEA9B, C12ORF57, CD79B, SEC14L1, POM121C, SCFD2, NUP88, ARSG, AAR2, GLYATL1, ARPP21, NR2F1, TYSND1, SLC16A11, GNG11, CIDEC, BHMT, BPIFB1, MAGED2, KYAT1, ZNF136, FERMT3, PCSK2,…	1471	2681	18482	1.11536	0.999998	1	1
CGAP_EST_QUARTILE	19342:brain_neoplasia_3rd	11	0.484155	0.095438	WWOX, SLC26A2, PCDHGB5, PCDHGB4, LRRC49, PCDHGC3, EIF3H, IDS, TACC1, LRPPRC, OSGEP	1302	79	16356	1.74917	1	1	1

## Sheet: Neural
DDX11L1
FAM138A
LOC101928626
ISG15
ACOT7
CAMTA1-AS2
SLC2A5
CORT
C1orf167-AS1
NPPA-AS1
SNORA59A
MIR6730
DHRS3
PDPN
CTRC
SLC25A34-AS1
HSPB7
CLCNKA
NECAP2
RNU1-1
ESPNP
MST1L
MIR3675
RNU1-2
CROCC
PADI1
MIR3972
PADI4
PADI6
RCC2-AS1
ARHGEF10L
IGSF21
KLHDC7A
PAX7
MIR4695
PLA2G2E
PLA2G5
PLA2G2D
LINC01757
VWA5B1
LINC00339
ZBTB40
MIR6127
C1QA
MYOM3
MIR4425
EXTL1
LIN28A
GPN2
NUDC
SYTL1
TAF12-DT
TAF12
RNU11
LINC01756
LAPTM5
FAM167B
ZBTB8B
A3GALT2
MIR552
GJB4
SFPQ
TFAP2E
MRPS15
CSF3R
EPHA10
MANEAL
RHBDL2
MACF1
PPIEL
GUCA2B
CCDC30
CFAP57
MIR6733
C1orf210
MPL
MIR6735
SZT2-AS1
MIR6079
ERI3-IT1
TSPAN1
P3R3URF
FAAHP1
KNCN
PDZK1IP1
TAL1
MIR4421
MIR6500
TTC39A-AS1
BSND
PCSK9
FYB2
C1orf87
NFIA-AS2
ATG4C
MIR6068
UBE2U
PDE4B
SGIP1
DYNLT5
SERBP1
RPE65
LINC01788
MSH4
ST6GALNAC5
SAMD13
RPF1
GBP2
BTBD8
C1orf146
PLPPR5-AS1
OLFM3
COL11A1
NTNG1
HENMT1
PRPF38B
MYBPHL
CSF1
LRIF1
KCND3-IT1
MOV10
LINC01356
OLFML3
SIKE1
SPAG17
LOC105378933
LOC102723769
RNVU1-4
PDE4DIP
NUDT17
RNF115
POLR3C
PDZK1
NBPF11
LINC02805
RNVU1-1
RNVU1-15
PFN1P2
LOC105371215
RNVU1-17
RNVU1-18
LINC02591
H3C14
H2AC18
H2AC19
H2BC20P
H3C15
H4C15
VPS45
LINC02988
CA14
MRPS21
ECM1
MIR4257
SETDB1
ANXA9
TMOD4
RFX5-AS1
RFX5
SELENBP1
CELF3
RORC
LCE3B
LCE1A
PGLYRP4
S100A5
S100A3
S100A14
MIR8083
LOC343052
HAX1
KCNN3
PMVK
MIR4258
LENEP
DCST1
DCST2
DPM3
FDPS
POU5F1P4
MSTO1
MSTO2P
SSR2
SEMA4A
VHLL
CCT3
MEF2D
LOC101928177
NES
PRCC
SH2D2A
MIR765
ETV3L
LINC01133
NHLH1
FCER1G
TOMM40L
MIR5187
NR1I3
PCP4L1
NUF2
RGS5
LRRC52
TMCO1-AS1
MIR3658
BLZF1
NME7
CCDC181
GORAB
PRRX1
FMO1
FMO4
MIR199A2
DNM3OS
DARS2
ASTN1
BRINP2
CLEC20A
AXDND1
MIR12116
KIAA1614-AS1
ZNF648
RNASEL
COLGALT2
LINC01633
HMCN1
BRINP3-DT
CACNA1S
ASCL5
IGFN1
IPO9-AS1
ELF3
ELF3-AS1
GPR37L1
ADORA1
PRELP
OPTC
ATP2B4
KISS1
PLEKHA6
CNTN2
RBBP5
MIR6769B
FCMR
LOC148696
MIR29B2CHG
CD34
LINC02767
MIR4260
LAMB3
UTP25
LINC00467
RPS6KC1
TGFB2
TGFB2-AS1
CAPN2
LEFTY1
LEFTY2
LOC105373289
LINC02809
MIR6742
TRIM17
AGT
CAPN9
TRIM67-AS1
GNPAT
C1orf131
LINC01132
RBM34
HEATR1
KIF26B-AS1
OR14A2
TRIM58
OR2L13
IDI2-AS1
ADARB2-AS1
CALML5
CALML3-AS1
MIR3155A
PROSER2-AS1
MIR548Q
UCMA
BEND7
FRMD4A
DCLRE1C
C1QL3
STAM
STAM-DT
ARMC3
C10orf67-AS1
GPR158
APBB1IP
PTCHD3
LINC02664
EPC1
HSD17B7P2
LINC00839
LINC01518
LINC01264
SNORD3J
LINC00840
LINC02881
DEPP1
AGAP10P
FAM25BP
ANTXRLP1
GDF2
FRMPD2B
FRMPD2
ARHGAP22
ARHGAP22-IT1
TMEM273
C10orf71-AS1
DRGX
TIMM23
ZWINT
TMEM26
ADO
TACR2
COL13A1
TYSND1
TBATA
UNC5B-AS1
CDH23-AS1
C10orf105
MIR7152
CDH23
CFAP70
SYNPO2L
CHCHD1
DUSP29
KCNMA1-AS3
KCNMA1
SFTPA2
SFTPA1
CCSER2
SNCG
FAM25A
LIPJ
CH25H
FFAR4
RRP12
HPS1-AS1
GOT1
DNMBP-AS1
CWF19L1
PKD2L1
HIF1AN
TLX1NB
MIR3158-2
NPM3
C10orf95
CALHM1
CFAP43
ITPRIP
LOC103344931
SNORA87
TDRD1
ENO4
TIAL1
C10orf88
EEF1AKMT2
AS-PTPRE
LINC01163
MIR4297
CTAGE7P
LINC02870
LINC01167
LINC01168
SCART1
SYCE1
SCGB1C1
IFITM2
IFITM1
SCT
LINC02688
MUC5AC
TOLLIP
KRTAP5-3
KRTAP5-4
CD81
CARS1-AS1
CARS1
MRGPRG
LOC101927708
TRPC2
OR51D1
TRIM6
TRIM6-TRIM34
CCKBR
TIMM10B
ARFIP2
DNHD1
DCHS1
NLRP10
CASC23
LINC02709
MICAL2
SPON1
CALCA
CALCB
INSC
LINC02751
C11orf58
LINC02729
TPH1
MRGPRX3
IGSF22
DBX1
BBOX1-AS1
METTL15
KIF18A
IMMP1L
PAX6-AS1
WT1
CSTF3-DT
CSTF3
CD59
NAT10
ELF5
EHF
LOC101928510
ALKBH3
ALX4
LINC02685
PRDM11
DGKZ
F2
MIR6745
MIR4487
C1QTNF4
APLNR
SERPING1
MIR130A
YPEL4
CLP1
GLYATL1
FAM111B
MRPL16
ZP1
SLC15A3
CD5
BEST1
SCGB1D2
UQCC3
LRRN4CL
SLC22A6
PYGM
MIR192
MIR6750
ATG2A
GPHA2
MIR6879
NAALADL1
SPDYC
SLC25A45
RNASEH2C
CTSW
TSGA10IP
NPAS4
C11orf86
ACY3
MYEOV
SHANK2-AS1
KRTAP5-10
ANAPC15
FOLR3
MIR139
ARAP1-AS2
ARAP1
PLEKHB1
MIR4696
RNF169
KLHL35
GUCY2EP
OMP
THRSP
NDUFC2
KCTD21-AS1
ALG8
RAB30
ANKRD42
ANKRD42-DT
CCDC81
MIR3166
RAB38
GRM5
NOX4
NAALAD2
MED17
ANKRD49
MRE11
LNCRNA-IUR
MIR1260B
CFAP300
BIRC3
DYNC2H1
DDI1
GRIA4
CUL5
C11orf87
LINC02550
COLCA2
NKAPD1
PIH1D2
NCAM1
NCAM1-AS1
TMPRSS5
HTR3A
APOC3
APOA1-AS
APOA1
TMPRSS13
UBE4A
ARCN1
PHLDB1
TREH
UPK2
DPAGT1
MIR6756
TRIM29
LOC101929227
BSX
VWA5A
PANX3
ROBO4
STT3A
STT3A-AS1
CHEK1
LOC118567325
VSIG10L2
KIRREL3-AS1
FLI1
LOC101929538
KCNJ5-AS1
TP53AIP1
LINC02551
LINC02731
LINC02714
FAM138D
NINJ2
LINC00942
LOC107984507
LRTM2
CACNA2D4
CACNA1C-AS2
THCAT155
LINC02443
NTF3
TNFRSF1A
ING4
LAG3
C12orf57
RNU7-1
C1R
C1RL
CLEC12A-AS1
EIF2S3B
STYK1
EMP1
H4-16
KCNJ8
ABCC9
SSPN
LINC00941
DDX11
ALG10
ALG10B
PDZRN4
SLC38A4
ENDOU
CCDC184
CCNT1
MIR4701
TUBA1A
LOC100335030
LINC02395
LINC02396
AQP6
COX14
TMPRSS12
TFCP2
LINC00592
LINC02874
KRT7-AS
KRT3
KRT4
MIR9898
LOC122455340
PFDN5
SP7
ATP5MC2
MIR196A2
HOXC5
MIR615
LOC100240735
CBX5
NFE2
GPR84-AS1
ZNF385A
METTL7B
DNAJC14
PAN2
TIMELESS
SNORD59A
ATP5F1B
NACA
PRIM1
GPR182
NDUFA4L2
INHBE
GLI1
MARS1
DTX3
ARHGEF25
LOC101927583
AGAP2
AVPR1A
MIR10527
RXYLT1-AS1
XPOT
LINC02454
LOC100507250
LGR5
KCNC2
GLIPR1L2
CAPS2
SYT1
ALX1
MKRN9P
C12orf29
CCER1
SOCS2
SNRPF
SNRPF-DT
LTA4H
SLC17A8
ANO4
LINC00485
PAH
GLT8D2
POLR3B
RFX4
LINC01498
TMEM119
MIR4496
DAO
LINC01404
MIR6760
ACAD10
SDS
TBX5
TBX5-AS1
CCDC60
TMEM233
RNU4-2
HNF1A
MIR7107
MORN3
HPD
ZCCHC8
PITPNM2
GTF2H3
EIF2B1
LINC02405
RIMBP2
ADGRD1-AS1
ZNF268
LOC101928697
TUBA3C
SPATA13
TPTE2P1
NUP58
USP12-AS1
LINC00543
CDX2
LINC00544
LINC00365
LINC00384
HSPH1
RFC3
DCLK1
FREM2
LINC00437
LOC101929140
MTRF1
TSC22D1-AS1
COG3
ERICH6B
LINC01198
NUDT15
MED4
ARL11
PCDH8
LINC00395
DACH1
EDNRB
LINC00351
GPC6
CLDN10-AS1
MBNL2
MIR623
LINC01039
CLYBL-AS3
LINC00554
ITGBL1
FGF14
LINC00551
NAXD
TEX29
LINC00354
TUBGCP3
ATP11AUN
ATP11A-AS1
F10-AS1
ADPRHL1
GAS6-AS1
C13orf46
POTEM
KLHL33
OSGEP
RNASE2
METTL17
SLC39A2
LOC101929718
SUPT16H
DAD1
AJUBA
PSMB11
CMTM5
MIR208A
MYH6
MHRT
MIR208B
MYH7
CPNE6
NRL
IRF9
REC8
MDP1
GMPR2
TGM1
LINC02282
LINC02313
RNU6-8
PAX9
LOC112268136
CLEC14A
GEMIN2
LINC02302
LINC00648
RN7SL1
RPS29
LRR1
ATL1
LINC02310
RTRAF
OTX2-AS1
CCDC175
SIX6
LINC02324
ZFYVE26
LOC100996664
SLC10A1
MIR7843
RBM25
RIOX1
VSX2
FCF1
LOC105370579
LINC02288
MIR1260A
ADCK1
LINC02308
FLRT2
LINC00642
LOC105370619
DGLUCY
GPR68
TRIP11
ITPK1
ASB2
CCDC197
IFI27
SERPINA2
SERPINA5
SYNE3
TCL1B
MIR342
LINC00523
MIR493
SNORD112
RTL1
MIR487B
MIR539
MIR889
MIR377
MEG9
PPP2R5C
LOC105378183
MARK3
LINC00638
PLD4
FAM30A
CHEK2P2
MIR5701-1
LINC01193
MIR1268A
SNURF
SNORD115-5
SNORD115-15
SNORD115-16
SNORD115-17
SNORD115-18
SNORD115-22
PWAR4
SNORD115-23
SNORD115-26
SNORD115-28
SNORD115-29
SNORD115-30
SNORD115-31
SNORD115-32
SNORD115-33
SNORD115-39
SNORD115-41
MIR4715
LINC00929
GABRA5
HERC2P10
TRPM1
MIR1233-1
MIR1233-2
DPH6-DT
CSNK1A1P1
LOC145845
PHGR1
KNL1
LTK
GANC
SNAP23
TGM5
MAP1A
SPG11
LOC100419583
SHF
SLC28A2-AS1
SEMA6D
EID1
SHC4
GALK2
MIR4716
MIR4713HG
LEO1
POLR2M
ALDH1A2-AS1
RNF111
MIR1272
PIF1
MTFMT
CILP
MIR4311
LCTL
LINC02206
MAP2K5
CALML4
CORO2B
ANP32A-IT1
LRRC49
GOLGA6B
REC114
ISLR
STRA6
CYP11A1
LINC02255
MIR4513
MIR6882
MIR631
MIR4313
LOC101929457
LINGO1-AS2
LINGO1
SH2D7
DNAJA4
LOC100129540
MIR184
MIR5572
IL16
SLC28A1
LINC02883
AGBL1
NTRK3-AS1
NTRK3
RLBP1
MIR6766
MIR9-3HG
RHCG
ANPEP
UNC45A
FAM174B
MIR3175
LETR1
LINC02251
IRAIN
PRKXP1
GCAWKR
LOC100507472
PCSK6-AS1
FAM138E
MPG
PTX4
MIR4717
SRRM2-AS1
PRSS33
MEFV
C16orf90
GLIS2
MIR6769A
TMEM114
LOC100130283
CARHSP1
TVP23A
CIITA
PRM2
RSL1D1
NPIPA3
NPIPA2
MPV17L
BMERB1
RPS15A
SYT17
LYRM1
CRYM-AS1
COG7
TNRC6A
LINC01567
C16orf82
LOC100128079
IL27
NUPR1
SULT1A2
SULT1A1
ATP2A1
CD19
SNX29P2
LOC606724
SULT1A4
LOC388242
NPIPB12
MIR3680-2
MVP
TLCD3B
SULT1A3
LOC613038
SEPTIN1
RNF40
STX1B
PRSS53
VKORC1
PRSS8
ITGAX
TP53TG3D
TP53TG3
TP53TG3C
TP53TG3B
LOC112268173
TP53TG3HP
LINC02167
LINC02192
ABCC12
LINC02140
CES1P1
CES1
GNAO1-AS1
BBS2
MT4
MT1E
CETP
DOK4
DRC7
MIR6772
APOOP5
LINC00920
CKLF
CKLF-CMTM1
CDH16
PLEKHG4
ZDHHC1
PSMB10
MIR6773
MIR140
DDX19A-DT
SF3B3
COG4
IL34
VAC14-AS1
HYDIN
TAT-AS1
DHX38
TXNL4B
ZFHX3-AS1
LINC01572
MLKL
WWOX
LINC01229
MAFTRR
LINC01227
C16orf46
PKD1L2
MIR6504
HSD17B2
TAF1C
LOC654780
WFDC1
KIAA0513
MIR5093
MIR6774
LINC00917
FOXC2
FOXL1
LINC02181
LOC101928682
JPH3
BANP
LINC02182
LOC100289580
ACSF3
LOC100287036
LOC105371430
SCARF1
SERPINF1
LOC101927911
LOC100288728
OR3A2
TRPV1
ITGAE
P2RX1
LINC01975
GGT6
VMO1
GLTPD2
C17orf114
CHRNE
MIR6865
RPAIN
NUP88
AIPL1
SLC16A11
ASGR2
ASGR1
MIR324
ACAP1
TMEM102
CHRNB1
CD68
SOX15
TP53
ALOX15B
PIK3R6
RCVRN
GAS7
MYH3
TMEM238L
PIRT
DNAH9
CDRT15
LINC02087
SNORD49B
SNORD49A
SNORD65
KRT17P1
TBC1D27P
TNFRSF13B
LOC284191
RAI1-AS1
SMCR5
MYO15A
LINC02076
FAM106A
TBC1D28
SLC5A10
GRAP
GRAPL
MFAP4
RNF112
SNORA59B
ALDH3A1
CCDC144CP
FAM106B
LOC100287072
LINC02088
CCDC144NL-AS1
CCDC144NL
LOC339260
LOC105371703
PPY2P
SEBOX
FOXN1
RSKR
PIPOX
NSRP1
MIR423
SMURF2P1-LRRC37BP1
LOC105371730
C17orf75
ASIC2
ZNF830
UNC45B
SLFN11
GAS2L2
RDM1
CCL3
TBC1D3B
TBC1D3I
TBC1D3H
TBC1D3F
HNF1B
TBC1D3L
TBC1D3G
MIR4727
CWC25
SNORA21
RPL23
MIR6779
ARL5C
LOC101929578
NEUROD2
ERBB2
GRB7
GSDMA
PSMD3
CSF3
MED24
RAPGEFL1
MIR6867
RARA
RARA-AS1
GJD3
CCR7
KRTAP3-1
KRTAP4-16
KRTAP4-9
KRTAP4-1
KRTAP9-2
KRT33A
KRT33B
KRT34
KRT31
KRT9
KRT14
HAP1
STAT5A
HSD17B1
BECN1
MIR6781
AOC3
IFI35
TMEM106A
CCDC200
LINC00910
LOC105371789
SLC4A1
MIR6783
NMT1
DCAKD
ARHGAP27
MAPK8IP1P2
STH
MIR5089
MYL4
HOXB1
HOXB-AS1
HOXB4
MIR10A
HOXB7
MIR196A1
PRAC2
PRAC1
MIR3185
HOXB13
MIR6165
SGCA
TMEM92
ACSF2
CACNA1G-AS1
WFIKKN2
HLF
RNF126P1
LOC101927539
MSX2P1
TSPOAP1
MIR4736
VMP1
HEATR6-DT
HEATR6
INTS2
TBC1D3P2
CYB561
CD79B
SCN4A
PRR29-AS1
ICAM2
TEX2
PRKAR1A
LINC01152
LINC02092
DNAI2
CD300A
CD300LD-AS1
OTOP3
MRPL58
CASKIN2
SMIM6
RECQL5
LOC122455342
MXRA7
MGAT5B
LOC105371899
SNHG20
SEC14L1
SCARNA16
MIR6516
MIR4316
LOC100507351
LINC01973
LOC105371910
DNAH17
CEP295NL
C1QTNF1-AS1
LINC01977
LINC01979
MIR1268B
CARD14
NPLOC4
TSPAN10
TEX19
HEXD-IT1
ZNF750
ADCYAP1
NDC80
LINC01443
ESCO1
SNRPD1
CTAGE1
DTNA
MIR187
SIGLEC15
LOXHD1
SKOR2
MIR1539
C18orf32
DCC
BOD1L2
NARS1
GRP
SERPINB5
LOC105372179
RTTN
LINC01910
C18orf63
CNDP1
MBP
PARD6G-AS1
FAM138F
PRTN3
GNA15
GNA15-DT
TEKTIP1
MATK
NMRK2
SNORD37
CREB3L3
STAP2
MIR7-3HG
MIR7-3
MIR4747
ACER1
CD70
C3
VAV1
RETN
CLEC4G
CLEC4GP1
PRAM1
ACTL9
ZNF317
ZNF266
ZNF560
ZNF812P
ICAM4
ZGLP1
MIR1238
MIR6886
LOC105372273
ANGPTL8
MIR7974
ZNF439
ZNF69
ZNF763
ZNF136
DHPS
GNG14
SNORD135
RTBDN
DNASE2
NFIX
RLN3
CLEC17A
ADGRE2
BRD4
PGLYRP2
CYP4F24P
CLEC4OP
CYP4F11
LINC00905
CIB3
FAM32A
PLVAP
CCDC194
BISPR
MVB12A
BST2
NIBAN3
SNORA68
SLC5A5
IL12RB1
GDF15
MIR3189
LRRC25
HAPLN4
ZNF14
ZNF56P
LINC00663
ZNF486
ZNF737
ZNF738
ZNF43
ZNF729
ZNF98
GOLGA2P9
ZNF99
ZNF723
ZNF728
ZNF730
ZNF724
LINC01224
RPSAP58
ZNF681
NUDT19
CHST8
SCGB2B3P
ZNF302
ZNF807P
LINC01801
MIR6887
MIR5196
GPR42
KRTDAP
SBSN
PMIS2
UPK1A
PSENEN
U2AF1L4
LIN37
NPHS1
TYROBP
ZNF529-AS1
ZNF790
ZNF345
ZNF875
ZNF540
ZNF573
SNORD152
RASGRP4
CAPN12
LGALS7
LGALS7B
SIRT2
SARS2
SYCN
IFNL3
GMFG
EID2
FCGBP
AKT2
HIPK4
LTBP4
MIA-RAB4B
BCKDHA
EXOSC5
ERICH4
PCAT19
CEACAM4
MIR6797
CD79A
LOC101930071
LIPE-AS1
CEACAM1
PSG8
PSG10P
PSG1
PSG7
PSG11
PSG4
PSG9
CD177
SRRM5
LOC105372412
ZNF283
ZNF45
ZNF221
ZNF223
MIR4531
APOC1
APOC1P1
GEMIN7
MARK4
RTN2
GIPR
MEIOSIN
NANOS2
HIF3A
PTGIR
GNG8
DACT3
MIR320E
SLC1A5
C5AR2
SLC8A2
CRX
TPRX2
SNAR-A12
SNAR-A1
SNAR-A3
SNAR-A13
SNAR-C3
CABP5
SPACA4
FUT2
PLEKHA4
NUCB1-AS1
CGB3
CGB5
CGB8
SLC6A16
FLT3LG
SNORD33
SNORD34
SNORD35A
FCGRT
MIR6799
MED25
IL4I1
SNAR-A4
SNAR-A14
SNAR-A5
SNAR-A6
SNAR-A7
SNAR-A9
SNAR-A10
SNAR-A11
SNAR-B1
IZUMO2
LRRC4B
SNAR-F
SNORD88B
SNORD88A
KLK1
LOC105372441
KLK3
KLK4
KLK5
KLK7
KLK14
SIGLEC9
CD33
LINC01872
IGLON5
VSIG10L
C19orf84
SIGLEC8
CEACAM18
SIGLEC12
LINC01530
SIGLEC5
HAS1
ZNF649
ZNF613
ZNF350
ZNF836
ZNF480
ZNF578
ZNF160
ZNF665
ZNF677
BIRC8
ZNF331
LOC284379
CACNG8
LILRB3
LILRA4
CDC42EP5
LILRA2
NCR1
GP6
SNORD157
LINC01864
ZNF542P
ZNF582-DT
ZNF582
ZIM2
AURKC
ZNF543
ZNF550
ZNF134
ZNF671
ZNF587
ZSCAN22
LOC105372480
A1BG
MIR10394
ZNF132
SLC27A5
MIR6807
LINC01939
LINC01250
TRAPPC12-AS1
ALLC
LOC105373394
LOC400940
LINC00299
MIR4261
KCNF1
LPIN1
LINC01804
MYCN
VSNL1
OSR1
HS1BP3-IT1
LDAH
APOB
TDRD15
ADCY3
LINC01381
MIR1301
TCF23
TOGARAM2
LINC01936
EHD3
DPY30
LTBP1
MORN2
OXER1
LINC01819
PREPL
CAMKMT
LINC01121
LINC02583
LINC01119
STPG4
EPCAM-DT
MSH2-OT1
CHAC2
ERLEC1
ASB3
MTIF2
PRORSD1P
MDH1
LINC02579
LINC01829
ETAA1
CNRIP1
ANTXR1
SNRPG
ATP6V1B1
SFXN5
DUSP11
ACTG2
INO80B-WBP1
INO80B
SNAR-H
LRRTM1
VAMP8
MIR6071
MIR4436A
GGT8P
KCNIP3
LOC105373496
FER1L5
MIR3127
LINC01104
NPAS2-AS1
MRPS9-AS1
C2orf49
MIR4265
LINC01123
MIR4267
MIR4436B1
LIMS4
ACOXL-AS1
ZC3H6
CHCHD5
NT5DC4
IL1RN
PSD4
PAX8
CBWD2
RABL2A
RPL23AP7
LINC02992
EN1
C1QL2
STEAP3-AS1
SCTR-AS1
LINC01101
CNTNAP5
CNTNAP5-DT
CYP27C1
PROC
IWS1
GPR17
LIMS2
SFT2D3
LINC02572
LINC01856
RAB6C
FAR2P1
MED15P9
POTEF
CYP4F62P
POTEJ
CYP4F30P
AMER3
RAB6D
POTEKP
ZNF285CP
FAM201B
RAB3GAP1
UBXN4
MMADHC-DT
LINC01876
MIR6888
KCNH7
SLC38A11
SCN7A
HOXD12
HOXD9
CHROMR
SCHLAP1
NEUROD1
ZNF804A
SATB2-AS1
AOX1
CASP8
NOP58
CMKLR2-AS
FAM237A
LINC01802
PLEKHM3
LINC00607
RPL37A
LINC01280
IGFBP5
TNS1
TNS1-AS1
MIR6513
MIR6810
CATIP
SLC11A1
VIL1
TUBA4B
SPEGNB
MIR3132
STK11IP
CCDC140
SPHKAP
SP110
SP100
GCSIR
ARMC9
ALPG
PRSS56
EFHD1
NGEF
LOC100286922
IQCA1-AS1
IQCA1
ACKR3
COPS8
RAB17
MIR4441
MGC16025
MIR4269
MIR4786
OR6B2
OR6B3
GPR35
AGXT
NEU4
LOC285097
TRIB3
SLC52A3
LOC388780
ZNF343
TMC2
IDH3B
C20orf141
TMEM239
UBOX5-AS1
UBOX5
GFRA4
SPEF1
LINC01730
LINC00654
LINC01729
SHLD1
MCM8
TRMT6
SNAP25
PCSK2
RBBP9
LINC00237
LOC112268271
NKX2-2
LINC00261
CST9
CST2
VSX1
LINC01597
FRG1BP
MYLK2
FOXS1
HCK
BPIFB3
BPIFB1
ACTL10
AHCY
MIR499A
MIR499B
UQCC1
GDF5
RBM39
EPB41L1-AS1
TLDC2
SRC
BPI
SNORA71D
ADIG
IFT52
JPH2
GDAP1L1
R3HDML
MIR3646
PIGT
MIR6812
ZSWIM3
ACOT8
ZSWIM1
ZNF663P
OCSTAMP
LOC100131496
LOC101927377
ZMYND8
LINC00494
CSE1L-DT
RIPOR3-AS1
GCNT7
BMP7-AS1
ZBP1
LINC01742
C20orf85
MIR296
EDN3
PHACTR3-AS1
LOC100128310
MIR1257
LINC00659
SEPTIN14P20
MIR10396A
ANKRD30BP2
CYP4F29P
LOC110091776
ABCC13
MIR125B2
LINC01683
MIR155HG
JAM2
CCT8
GRIK1
TCP10L
LINC01426
SETD4
DSCR9
GET1
B3GALT5
B3GALT5-AS1
PCP4
MX2
MX1
LINC00111
LINC00112
LINC00479
SNORA91
UMODL1-AS1
TFF3
TFF2
TFF1
TMPRSS3
UBASH3A
LINC01668
ERVH48-1
CBS
LINC00322
LINC02575
TSPEAR-AS2
KRTAP10-7
KRTAP10-11
FTCD
S100B
POTEH
LINC01665
GAB4
CECR7
CECR3
SLC25A18
MIR648
USP18
GGT3P
POM121L15P
LINC00895
CCDC188
MIR1286
RIMBP3
POM121L4P
LOC102724728
POM121L8P
LOC102724751
UBE2L3
RIMBP3C
VPREB1
GGTLC2
POM121L1P
MIR650
VPREB3
C22orf15
LOC100652871
GSTT4
BCRP3
POM121L10P
KIAA1671
CRYBB1
MIAT
MIATNB
SNORD125
HORMAD2
HORMAD2-AS1
LIF-AS1
LIF
KIAA1656
LOC105372990
SEC14L3
GAL3ST1
TCN2
PLA2G3
RNF185
MIR3928
MIR7109
YWHAH-AS1
AP1B1P1
MIR3909
MIR6069
MB
APOL6
RBFOX2
APOL3
APOL4
APOL2
CACNG2-DT
CACNG2
IL2RB
C1QTNF6
CYTH4
NOL12
MIR4534
SNORA92
KCNJ4
APOBEC3A
APOBEC3B
APOBEC3B-AS1
APOBEC3C
SNORD83B
SNORD83A
SNORD139
MGAT3-AS1
LOC112268293
MIR6889
ZC3H7B
CSDC2
LOC105373044
MIR378I
CYP2D6
CYP2D7
SCUBE1-AS1
LINC01639
EFCAB6-AS1
SHISAL1
LOC105373064
MIR1249
LOC339685
LOC284933
MOV10L1
RPL23AP82
CAV3
EMC3-AS1
EMC3
FANCD2
CIDECP1
LINC00606
HRH1
VGLL4
TSEN2
TMEM40
SNORA93
TPRXL
GRIP2
CCDC174
LINC02011
MRPS25
UBE2E1-AS1
THRB-AS1
OXSM
LRRC3B
GADL1
ARPP21
VILL
ENTPD3-AS1
ZNF619
ZNF620
TRAK1
CCK
CCDC13-AS1
GASK1A
C3orf86
ZNF501
MIR564
TMEM42
CLEC3B
LZTFL1
LTF
MYL3
PTH1R
MIR711
QARS1
AMT
RBM6
GNAT1
LSMEM2
HYAL1
GPR62
LINC00696
TLR9
DNAH1
ITIH3
ITIH4-AS1
DCP1A
WNT5A
SPATA12
ACOX2
FAM3D
C3orf14
PTPRG-AS1
ADAMTS9
TMF1
SAMMSON
LINC00877
PDZRN3-AS1
LINC00960
ROBO2
EPHA3
NSUN3
DHFR2
CMSS1
LINC01990
MORC1
TAGLN3
GTPBP8
ZBTB20
GAP43
LSAMP
TEX55
ARHGAP31
TMEM39A
COX17
GTF2E1
RABL3
WDR5B-DT
WDR5B
SEMA5B
MYLK-AS2
SLC41A3
[truncated: 899 more rows]

## Sheet: Neural_DAVID
Category	Term	Count	%	PValue	Genes	List Total	Pop Hits	Pop Total	Fold Enrichment	Bonferroni	Benjamini	FDR
UNIGENE_EST_QUARTILE	normal_disease_3rd	908	31.715	5.92442e-21	PGLYRP4, PGLYRP2, GMFG, VPREB3, ENDOU, CYP2D7, LIPJ, IGLON5, UBASH3A, LINC02714, SAMD13, KRTDAP, SDS, RBFOX2, CFAP95, TEX55, PDZK1, CACNA2D4, RNASE2, MYL4, CTAGE1, CH25H, FAM133A, MYL7, ZFYVE16, CTAGE4, TFR2, PRKAR1A, RFX4, MYL3, CTAGE9, LINC00523, PRKXP1, PADI4, HPD, PADI1, FAXDC2, SHOX2, CLCNKA, GATA4, PLA2G5, GATA1, TEX29, C12ORF57, ADAMTS13, SCGB1D2, KCNMB1, MOV10L1, LINC02731, ZNF268, SULT1A…	1704	7605	17825	1.24895	4.50256e-19	4.50256e-19	4.20634e-19
UNIGENE_EST_QUARTILE	brain_normal_3rd	682	23.8212	1.10765e-08	PGLYRP2, SPAAR, EPB41L1-AS1, YWHAH-AS1, GUSBP19, RNF112, ENDOU, MSANTD1, CREB3L3, SOX15, LINC01502, LINC02714, LINC00654, LOC613038, ACOT8, CFAP95, SDS, SOX14, RNASE2, MYL4, FAM133A, CH25H, ZFYVE16, PRKAR1A, RFX4, ZSCAN22, MAP1A, LINC00523, LINC00887, PRKXP1, PADI4, HPD, NGEF, PADI1, LINC00642, ASTN1, TSPYL5, TPH1, FAXDC2, SHOX2, AGAP2, CLCNKA, A1BG, PLA2G5, ANAPC10, TEX29, SLC5A5, C12ORF57, PPP3…	1704	6024	17825	1.18429	8.41815e-07	4.20907e-07	3.93216e-07
UNIGENE_EST_QUARTILE	embryo_development_3rd	862	30.1083	2.64229e-08	PGLYRP4, PGLYRP2, GMFG, VPREB3, ZFYVE26, VPREB1, CYP2D7, LIPJ, IGLON5, MTERF1, LINC02714, KRTDAP, RBFOX2, CFAP95, PDZK1, RNASE2, MYL4, FAM133A, MYL7, CTAGE4, TFR2, RFX4, MYL3, RABL3, CTAGE9, PRKXP1, PADI4, HPD, NGEF, PIF1, ZNF273, FAXDC2, SHOX2, CLCNKA, GATA4, PLA2G5, ZC3HAV1, GATA1, TEX29, C12ORF57, ADAMTS13, SCGB1D2, KCNMB1, LINC02731, ZNF268, SULT1A2, GPR17, HTATSF1P2, FYB2, GLYATL1, CFAP70, N…	1704	7894	17825	1.14227	2.00813e-06	6.69379e-07	6.25341e-07
UP_TISSUE	Plasma	56	1.95599	8.26266e-07	FCGBP, FCN2, ROBO4, ECM1, IL1RN, PGLYRP2, TNC, ICAM2, F13A1, CWC27, CNDP1, ASGR2, SERPINA5, C4B, CDH6, C4A, HYAL1, ANPEP, C1RL, CFAP95, IGFBP5, SERPINF1, ITGA1, F2, CEACAM1, OPTC, SERPING1, MASP1, FREM2, CFB, CETP, PON3, C1QA, ITIH3, TNXB, C1R, PON1, A1BG, LPAR4, CFP, C3, CLEC3B, ADAMTS13, NCAM1, APOB, JAM2, AOC3, NTRK2, L1CAM, AGT, MFAP4, PROC, LCN2, CNTN2, SP8, KLKB1	1762	294	18482	1.99795	0.00029576	0.000295803	0.000295803
GNF_U133A_QUARTILE	Cerebellum_3rd	961	33.5662	4.08727e-05	SCT, ENDOU, NDST1, ZFYVE26, VPREB1, ISLR, CYP2D6, PSMD5, AKT2, MTERF1, UBASH3A, SDS, RBFOX2, PDZK1, RNASE2, ZNF14, MYL4, CTAGE1, CH25H, EID1, MYL7, ZFYVE16, CTAGE4, TFR2, MYL3, RFX5, RABL3, CTAGE9, PADI4, SNORA21, HPD, PADI1, ZNF273, COL13A1, SHOX2, AGAP2, MTMR8, CLCNKA, PLA2G3, GATA4, PLA2G5, ZC3HAV1, GATA1, SLC5A5, ADAMTS13, SCGB1D2, CFAP69, GTF2IRD2B, ZNF268, SULT1A4, SULT1A3, ABCA1, MCTS1, GP…	1269	9668	13625	1.06724	0.00318306	0.00188249	0.00154461
GNF_U133A_QUARTILE	salivarygland_3rd	1005	35.103	4.82689e-05	HCP5, PGLYRP4, SCT, VPREB3, ENDOU, NDST1, ZFYVE26, VPREB1, CYP2D6, PSMD5, AKT2, PSMD3, MTERF1, UBASH3A, SDS, RBFOX2, PDZK1, RNASE2, ZNF14, MYL4, CTAGE1, CH25H, MYL7, CTAGE4, TFR2, MYL3, RFX5, RABL3, CTAGE9, PADI4, SNORA21, HPD, PADI1, ZNF273, COL13A1, FAXDC2, SHOX2, AGAP2, MTMR8, MRPL16, CLCNKA, PLA2G3, GATA4, PLA2G5, ZC3HAV1, GATA1, SLC5A5, HSPH1, ADAMTS13, SCGB1D2, KCNMB1, CFAP69, LTA4H, GTF2IR…	1269	10176	13625	1.06039	0.00375799	0.00188249	0.00154461
GNF_U133A_QUARTILE	lymphomaburkittsRaji_3rd	935	32.6581	0.000192658	HCP5, SCT, GMFG, TMEM92, VPREB3, ENDOU, NDST1, ZFYVE26, VPREB1, CYP2D6, PSMD5, AKT2, MTERF1, UBASH3A, SDS, RBFOX2, PDZK1, RNASE2, ZNF14, MYL4, CTAGE1, CH25H, MYL7, CTAGE4, TFR2, MYL3, RFX5, RABL3, CTAGE9, PADI4, SNORA21, HPD, PADI1, ZNF273, COL13A1, SHOX2, AGAP2, MTMR8, MRPL16, CLCNKA, PLA2G3, GATA4, PLA2G5, ZC3HAV1, GATA1, SLC5A5, HSPH1, SCGB1D2, CFAP69, LTA4H, GTF2IRD2B, SULT1A4, SULT1A3, ZNF26…	1269	9441	13625	1.06333	0.0149164	0.00500912	0.00411005
HPA_RNA_TISSUE	choroid plexus	73	2.54977	0.000524901	CLXN, SPAG17, SPEF1, WFIKKN2, H2AC19, HTR2C, TREM2, EFCAB12, CALML4, CFAP300, ENO4, AQP1, CATIP, GET1, CFAP43, CA14, DYNC2H1, PSENEN, DYNLT5, LAG3, CFAP95, SLC11A1, SERPINF1, SLC2A12, TUBA4B, VWA5B1, PCP4, ETV3L, ARMC3, CFAP57, EFHC2, CCDC81, IQCA1, C1QA, DRC7, TPH1, GDPD2, STMND1, SLC38A11, PKD1L2, DNAH9, RSPH9, PLA2G5, SLC5A5, CRHR2, POU5F1B, CCDC30, TOGARAM2, CCDC181, CFAP69, ALX4, LEFTY2, GAS…	1213	443	10914	1.48266	0.0182085	0.0188964	0.0188964
GNF_U133A_QUARTILE	Prefrontal Cortex_3rd	250	8.7321	0.00106544	SPON1, IL1RN, VIPR2, PLEKHB1, CPNE6, TMEM92, NDST1, EDNRB, SOX15, NIPAL2, ACAD10, TNS1, MBNL2, RBFOX2, SLC11A1, PSG1, HNF1B, ANK2, KNL1, ZNF14, PSG9, PSG8, PSG4, CTAGE4, PSG7, MAP1A, CTAGE9, PADI4, TAGLN3, SNORA21, ASTN1, GIPR, FAXDC2, AGAP2, MTMR8, PCDH12, PLA2G5, PRDM11, SLC5A5, NHLH1, CEP70, NUP88, ABCA1, MAPK8IP1P2, H4C9, DTNA, ARPP21, CFAP70, NR2F1, MICAL2, L1CAM, ST18, DCLK1, BHMT, EHD3, NM…	1269	2248	13625	1.19404	0.0797857	0.0191097	0.0156798
GNF_U133A_QUARTILE	WHOLE BLOOD_3rd	444	15.5082	0.00122498	PGLYRP4, EHF, SCT, RPL9, TMEM92, ISLR, ZFYVE26, PSMD5, SOX15, HOXA2, MTERF1, GNAT1, SERPINF1, ARMC9, SOX14, CEL, RNASE2, CPED1, ZFYVE16, CTAGE4, TFR2, CTAGE9, MAGEA5P, SERPING1, PADI4, SNORA21, HOXB7, TPH1, COL13A1, FAXDC2, SHOX2, MTMR8, CLCNKA, GATA4, PLA2G5, MEFV, PRDM11, ANAPC10, SCGB1D2, KCNMB1, GTF2IRD2B, ZSCAN16, ZNF268, SULT1A4, SULT1A3, ABCA1, BTF3, GPR17, RPL23AP7, DNAH17, CFAP70, GP6, G…	1269	4239	13625	1.12459	0.091179	0.0191097	0.0156798
HPA_NORMAL_TISSUE_CELLTYPE	appendix; enterocytes - Microvilli	36	1.25742	0.000178987	CLXN, SLC26A2, ACY3, SGMS2, CALML4, HAPLN4, ACTG2, DDO, SULT1A1, CAPN9, SCIN, MECOM, ANPEP, CD19, C1RL, LEO1, TLDC2, NCAM1, VILL, S100A14, SULT1A4, SULT1A3, SULT1A2, CD177, PDGFRA, PHGR1, TNFRSF10C, APOA1, DCLK1, VIL1, VAMP8, VCAN, CEACAM1, CDHR2, TMEM119, TFF2	1028	200	11043	1.9336	0.0425653	0.0434938	0.0434938
GNF_U133A_QUARTILE	Liver_3rd	143	4.99476	0.00748039	PGLYRP4, PLVAP, VIPR2, CSF1, TNC, AQP6, RORC, ZBTB20, AQP7, SLC4A1, CALML4, PSMD5, FCGRT, ANPEP, TNFSF10, CAPN2, PRSS8, TGM5, ACAD10, TNS1, ACOT7, ENDOG, IGFBP5, PIPOX, HNF1B, ANK2, CEL, PDZK1, GEM, GRIP2, PSG8, ALDH3A1, MYCN, PSG4, PSG7, APLNR, HOXB1, HOXB7, HPD, MT1E, IQCA1, SLC22A6, KLK1, SH2D2A, CLCNKA, MST1L, RNF5P1, CASKIN2, CYTL1, S100A14, TSPAN1, GOT1, SLC10A1, CYP4F11, ALOX15B, ACSF2, VI…	1269	1257	13625	1.22145	0.443264	0.0729338	0.0598431
GNF_U133A_QUARTILE	Amygdala_3rd	298	10.4087	0.00672202	HCP5, SPON1, IL1RN, ZMYND8, AQP6, FCF1, AQP7, CALML4, ANTXR1, TMEM92, VPREB3, TIAL1, TP53AIP1, PSMD5, AKT2, CHEK1, ARFIP1, MTERF1, THSD7A, HOXA7, ACAD10, TRIM23, TNS1, COG7, MBNL2, RBFOX2, DDX11, ZNF160, SLC11A1, PSG1, ARMC9, CEL, KNL1, RNASE2, PSG8, PSG4, CTAGE4, TFR2, PSG7, CTAGE9, ZNF711, MXRA7, HOXB1, SNORA21, HOXB7, CFTR, CFB, BLZF1, MT1E, ASTN1, GIPR, CES1P1, IGSF1, SHOX2, CSTF2, PIK3R4, AG…	1269	2818	13625	1.1354	0.409088	0.0729338	0.0598431
GNF_U133A_QUARTILE	Lung_3rd	305	10.6532	0.00651664	PGLYRP4, IFITM1, IL1RN, IFITM2, ZMYND8, AQP7, SLC4A1, CALML4, TCL1B, EDNRB, CYP2D6, TRIM29, SOX15, ANPEP, ARFIP2, GNAT1, ACOT8, SDS, ENDOG, SERPINF1, RPL23, PSG1, ALG3, GPR37L1, KNL1, HNF1A, MYL4, CARHSP1, IFI27, TFR2, NINJ2, MAP1A, SERPING1, VDAC1, TRIB3, PADI4, HOXB1, EPHA1, HOXB7, HPD, CFTR, CFB, EPHA3, CES1, MT1E, CETP, GRB7, ANAPC15, COL13A1, FAXDC2, SHOX2, CLCNKA, GATA4, PLA2G5, CFP, MST1L,…	1269	2888	13625	1.13391	0.399481	0.0729338	0.0598431
UNIGENE_EST_QUARTILE	lung_normal_3rd	565	19.7345	0.00648887	PGLYRP4, SPAAR, GMFG, RNF112, HOXA2, MTERF1, LOC100286922, LOC441179, ACOT8, CFAP95, SDS, ENDOG, DDX11, TEX55, MYL4, CH25H, EID2, MYL7, CTAGE4, RFX4, ZSCAN22, MAP1A, MYL3, CTAGE9, PIH1D2, SERPING1, PRKXP1, PADI4, PPIEL, HPD, FREM2, ASTN1, TSPYL5, LINC00885, TPH1, ANAPC15, SHOX2, MTMR8, MRPL16, CLCNKA, A1BG, MAGEA9B, PLA2G5, CFP, GATA1, TEX29, SLC5A5, C12ORF57, SULT1A1, C3, XKRX, FLRT2, LINC02731,…	1704	5425	17825	1.08945	0.390283	0.0986308	0.0921419
UNIGENE_EST_QUARTILE	germ cell tumor_disease_3rd	561	19.5948	0.00527142	PGLYRP2, TMEM92, VPREB3, IL4I1, RNF112, VPREB1, ZFYVE26, MSANTD1, HENMT1, LIPJ, PSMD5, CLP1, IGLON5, SOX15, PSMD3, HOXA2, LINC00654, KRTDAP, CFAP95, ARMC9, GTPBP8, CACNA2D4, MED4, MYL4, FAM133A, MYL7, RFX4, ZSCAN22, RABL3, PIH1D2, HOXB1, ALG10B, ASTN1, LINC00885, PIF1, ZNF273, AGAP2, MTMR8, CLCNKA, BLOC1S4, C12ORF57, PPP3R2, HSPH1, ADAMTS13, CEP70, ALX4, MOV10L1, NUP88, LTA4H, LINC02731, ZNF268, …	1704	5370	17825	1.09282	0.33081	0.0986308	0.0921419
GNF_U133A_QUARTILE	BM-CD105+Endothelial_3rd	391	13.657	0.0127128	PGLYRP4, TMEM92, NDST1, ISLR, ZFYVE26, PSMD5, HOXA2, MTERF1, MBNL2, SERPINF1, RPL23, ARMC9, RNASE2, CH25H, CTAGE4, CTAGE9, MAGEA5P, SERPING1, SNORA21, COL13A1, FAXDC2, SHOX2, MTMR8, CLCNKA, GATA4, MAGEA9B, PLA2G5, MEFV, ANAPC10, C3, SCGB1D2, KCNMB1, CEP70, NUP88, ZSCAN16, ZNF268, ABCA1, RPL23AP7, ARPP21, CFAP70, GP6, GP5, ST18, SULT1B1, BHMT, COL1A2, CILP, PAH, WDR5B, SSPN, NOX4, LINC00663, GTF2H…	1269	3818	13625	1.09955	0.631367	0.0991596	0.0813617
GNF_U133A_QUARTILE	fetalThyroid_3rd	101	3.52777	0.0123097	TP53TG3B, FCGBP, FCN2, TP53TG3C, TP53TG3D, PRDM9, TMEM92, TP53AIP1, ISLR, HMGN5, PSMD5, TRIM29, SOX15, CD177, HERC6, SLC11A1, ARMC9, PIPOX, ZNF98, ANK2, MUC3A, MID2, PSG9, CTAGE4, CTAGE9, APLNR, TAGLN3, CFTR, BLZF1, CALCA, SLC26A2, CALCB, MEFV, LTBP1, ART3, CRHR2, HRH1, CALD1, CASKIN2, NHLH1, NAALAD2, MBP, SLC15A3, ZNF268, STRA6, SIGLEC15, CFAP70, GP6, L1CAM, DAO, SSPN, CCSER2, NES, TNFRSF13B, CE…	1269	865	13625	1.25366	0.619443	0.0991596	0.0813617
GNF_U133A_QUARTILE	TONGUE_3rd	344	12.0154	0.0167688	PGLYRP4, SPON1, EHF, IL1RN, ZMYND8, AQP6, FCF1, CALML4, ANTXR1, TMEM92, ANP32A-IT1, TP53AIP1, ISLR, ZFYVE26, EDNRB, CYP2D6, PSMD5, TRIM29, CHEK1, MAGEA2, ARFIP1, MTERF1, GNAT1, THSD7A, HERC6, TRIM23, SLC11A1, PSG1, ARMC9, ANK2, KNL1, RNASE2, HCG4B, PSG9, PSG8, PSG4, CTAGE4, PSG7, MAP1A, MAGEB2, CTAGE9, MAGEA5P, ZNF711, SNORA21, HOXB7, CFTR, BLZF1, EPHA3, ZNF273, COL13A1, FAXDC2, SHOX2, PIK3R4, PC…	1269	3341	13625	1.1055	0.732613	0.118906	0.0975641
GNF_U133A_QUARTILE	Smooth Muscle_3rd	392	13.6919	0.0183267	SLC4A1, TMEM92, VPREB3, VPREB1, ZFYVE26, CYP2D6, PSMD5, AKT2, HOXA2, MTERF1, GNAT1, RBFOX2, ARMC9, CEL, RNASE2, CPED1, CTAGE4, TFR2, MYL3, CTAGE9, PADI4, SNORA21, PADI1, COL13A1, SHOX2, AGAP2, MTMR8, CLCNKA, PLA2G3, PLA2G5, ANAPC10, SCGB1D2, CFAP69, NUP88, ZSCAN16, ZNF268, ABCA1, BTF3, RPL23AP7, ARPP21, CFAP70, GP6, SULT1B1, PAH, WDR5B, SSPN, NOX4, HOXD9, SPEF1, ZNF43, PYGM, MYOM2, ASGR2, MECOM, …	1269	3851	13625	1.09292	0.763721	0.119123	0.0977422
UNIGENE_EST_QUARTILE	liver_normal_3rd	337	11.7709	0.0101443	PGLYRP2, LRR1, FCF1, AQP7, FRG1HP, SLC4A1, RPL9, TMEM92, MAGEA9, C4B, C4A, CREB3L3, PSMD5, ANPEP, HOXA2, OXER1, UBASH3A, LOC100286922, ACAD10, LOC441179, RNF111, RPS12, LOC613038, SDS, SERPINF1, DDX11, RPL23, PDZK1, KNL1, VWA5B1, MYL4, PSG8, FAM133A, MYL7, IFI27, PSG4, CTAGE4, TFR2, PSG7, ZSCAN22, MYL3, MAGEB2, CTAGE9, SERPING1, VDAC1, EPHA1, HOXB7, HPD, CFTR, CFB, BLZF1, CES1, MT1E, CETP, TMEM16…	1704	3144	17825	1.12126	0.539253	0.128495	0.120041
GNF_U133A_QUARTILE	Pons_3rd	554	19.3503	0.0302186	PGLYRP4, SCT, H2AC19, SLC4A1, YWHAH-AS1, TMEM92, H2AC18, NDST1, ISLR, ZFYVE26, CYP2D6, PSMD5, AKT2, HOXA3, HOXA2, MTERF1, GNAT1, RNF111, ACOT8, MBNL2, RBFOX2, DDX11, ARMC9, SOX14, CEL, RNASE2, CPED1, CTAGE1, MYL4, EID1, CH25H, ZFYVE16, PRKAR1A, CTAGE4, TFR2, MAP1A, RFX5, CTAGE9, PADI4, HOXB1, SNORA21, PADI1, CFB, ASTN1, TSPYL5, TPH1, FAXDC2, SHOX2, MTMR8, CLCNKA, MAGEA9B, PLA2G5, CFP, PRDM11, POU…	1269	5600	13625	1.06218	0.908681	0.168361	0.138142
GNF_U133A_QUARTILE	Colorectal Adenocarcinoma_3rd	286	9.98952	0.0289103	SPON1, ZMYND8, PLEKHB1, CPNE6, AQP6, ANTXR1, TMEM92, RAPGEFL1, ANP32A-IT1, UBE2L3, NDST1, EDNRB, TRIM29, SOX15, HERC6, TRIM23, ACOT7, MBNL2, RBFOX2, KRT4, ARMC9, ANK2, PSG9, EID1, MYL7, CTAGE4, TFR2, PRKAR1A, MAP1A, CTAGE9, HOXB1, TAGLN3, CFB, PADI1, ASTN1, MACF1, GIPR, IGSF1, SHOX2, PIK3R4, AGAP2, MTMR8, PLA2G5, CFP, KLK7, HSPH1, FLRT2, KCNN3, ZNF268, NKX2-2, MAPK8IP1P2, SIGLEC15, H4C9, DTNA, AR…	1269	2779	13625	1.10497	0.898555	0.168361	0.138142
GNF_U133A_QUARTILE	Uterus_3rd	258	9.01153	0.0413689	PGLYRP4, IL1RN, VIPR2, ZMYND8, AQP6, FCF1, ANTXR1, TMEM92, ANP32A-IT1, MAGEA9, TP53AIP1, NDST1, ISLR, VPREB1, ZFYVE26, EDNRB, TRIM29, TNFSF10, MAGEA2, MTERF1, MYOZ3, THSD7A, HERC6, RBFOX2, ZNF160, SLC11A1, PSG1, ARMC9, KNL1, ZNF14, PSG9, PSG8, CH25H, PSG4, CTAGE4, PSG7, MAGEB2, RABL3, CTAGE9, ZNF711, HOXB7, CFTR, CFB, BLZF1, EPHA3, COL13A1, CES1P1, FAXDC2, SHOX2, PIK3R4, GATA4, PCDH12, MAGEA9B, L…	1269	2511	13625	1.10318	0.962948	0.210376	0.172617
GNF_U133A_QUARTILE	fetallung_3rd	192	6.70625	0.0431541	IL1RN, CSF2, ZMYND8, NRL, ICAM4, SLC4A1, CALML4, IL1RAP, ACTG2, LOC729080, CYP2D6, FCGRT, CLP1, SOX15, ANPEP, NIPAL2, C1RL, TNFSF10, CAPN2, ARFIP1, SLC39A2, HLA-DOA, TGM5, CA14, TNS1, KRT4, CD300A, SERPINF1, DDX11, PIPOX, CDKAL1, PCOLCE, CEL, PDZK1, MYL4, RAB30, H4C15, TFR2, CTAGE4, RFX5, H4C12, CTAGE9, PMS2P3, H4C11, APLNR, SERPING1, MASP1, PADI4, HOXB1, EPHA1, HPD, CFB, MT1E, NKAPD1, CETP, INO8…	1269	1832	13625	1.12525	0.967961	0.210376	0.172617
UNIGENE_EST_QUARTILE	testis_normal_3rd	647	22.5987	0.0205216	HCP5, PGLYRP2, MRGPRG, TMEM92, VPREB3, IL4I1, FAR2P1, VPREB1, MSANTD1, HENMT1, LIPJ, PSMD5, SOX15, PSMD3, HOXA2, SAMD13, RNF111, LINC00654, KRTDAP, CFAP95, TEX55, CACNA2D4, MED4, GANC, CTAGE1, MYL4, FAM133A, MYL7, PRKAR1A, CTAGE4, RFX4, CTAGE9, LINC00523, PIH1D2, PRKXP1, HOXB1, HPD, LINC00642, ASTN1, TSPYL5, LINC00885, CLEC20A, ZNF273, FAXDC2, SHOX2, CLCNKA, GATA4, MAGEA9B, PLA2G5, TEX29, PPP3R2,…	1704	6353	17825	1.06533	0.793171	0.222805	0.208147
GNF_U133A_QUARTILE	spinalcord_3rd	211	7.36989	0.0514182	SPON1, IL1RN, CALML5, ZMYND8, CPNE6, FCF1, CALML4, ANTXR1, ANP32A-IT1, MAGEA9, TP53AIP1, PSMD5, TRIM29, MYC, SOX15, MAGEA2, ARFIP1, LGALS7, ZNF160, SLC11A1, PSG1, ARMC9, HNF1B, KNL1, CPED1, PSG8, PSG4, TFR2, PSG7, MAP1A, RFX5, MAGEB2, ZNF711, PADI4, CFTR, CFB, BLZF1, GRB7, SLC22A6, TPH1, ZNF273, KLK1, COL13A1, FAXDC2, SHOX2, PIK3R4, MAGEA9B, LPAR4, MEFV, KLK7, SCGB1D2, NHLH1, ARSJ, S100A14, ZNF26…	1269	2035	13625	1.11325	0.983713	0.235919	0.193574
UNIGENE_EST_QUARTILE	connective tissue_normal_3rd	330	11.5264	0.0295512	ZMYND8, GORAB, ANTXR1, RPL9, UBE2L3, AQP1, IL4I1, TCL1B, CLP1, ANPEP, INSC, MAGEA1, MAGEA2, MTERF1, UBASH3A, THSD7A, HMCN1, LINC00654, SP110, SLC11A1, CPED1, MYL7, PRKAR1A, MAP1A, SPATA13, SERPING1, UPRT, HECA, MXRA7, VSIG10L2, CCDC81, CFB, NGEF, EPHA3, MT1E, TSPYL5, FAXDC2, ARX, A1BG, PCDH12, CFP, GATA1, PCDH18, SEC14L1, ADAMTS13, PPP3R2, FLRT2, ARSJ, HOXC5, ST8SIA4, ALX4, MOV10L1, LTA4H, BBS2, …	1704	3140	17825	1.09937	0.89769	0.249544	0.233126
UNIGENE_EST_QUARTILE	spleen_normal_3rd	337	11.7709	0.0294529	IL1RN, GMFG, ICAM2, AQP7, SLC4A1, VPREB3, IL4I1, EDNRB, MSANTD1, HENMT1, BCRP3, NIPAL2, HOXA2, CHAC2, UBASH3A, RPS12, HERC6, SP110, SLC11A1, SYTL1, FLT3LG, TXLNGY, CACNA2D4, RNASE2, HCG4B, PSG9, GNPAT, ZNF542P, ZFYVE16, TRIM17, ZSCAN22, SERPING1, UPRT, ZNF711, PADI4, MXRA7, CCDC81, ZNF830, EPHA3, CES1, CETP, PIF1, TMEM161B, SH2D2A, MTMR8, A1BG, PCDH12, ZC3HAV1, CFP, PRDM11, GSPT2, PCDH18, PIK3R6,…	1704	3215	17825	1.0965	0.896899	0.249544	0.233126
GNF_U133A_QUARTILE	Trigeminal Ganglion_3rd	151	5.27419	0.0577786	PGLYRP4, FCGBP, PLVAP, CSF3, SPON1, EHF, IL1RN, FCMR, TNC, RORC, ZBTB20, F13A1, CALML4, ACTG2, RGS5, TRIM29, SOX15, NIPAL2, C1RL, TNFSF10, CAPN2, ARFIP2, PRSS8, HLA-DOA, SOX4, TNS1, KRT4, IGFBP5, SLC11A1, GEM, GRIP2, ARMCX3, CH25H, PSG8, ALDH3A1, ARMCX2, PSG4, PRKAR1A, CTAGE4, PSG7, MAP1A, CTAGE9, SERPING1, NUPR1, HOXB1, CFB, CES1, SLC26A2, SH2D2A, SLC1A5, FUT2, LTBP1, CD79A, CALD1, KCNMB1, NUP88…	1269	1431	13625	1.13295	0.990363	0.250374	0.205435
GNF_U133A_QUARTILE	bone marrow_3rd	213	7.43975	0.0691475	SPON1, IL1RN, ZMYND8, AQP6, FCF1, ANTXR1, TMEM92, ANP32A-IT1, TP53AIP1, TCL1B, TRIM29, SOX15, CHEK1, MAGEA2, TNS1, ZNF160, SLC11A1, PSG1, FLT3LG, HNF1B, KNL1, CTAGE4, MAP1A, CTAGE9, SERPING1, ZNF711, PADI4, CFTR, CFB, BLZF1, TPH1, CES1P1, FAXDC2, SHOX2, PIK3R4, AGAP2, LPAR4, MEFV, TRPM1, SEC14L1, FLRT2, NHLH1, ARSJ, TSPAN1, MAP9, MAPK8IP1P2, SIGLEC15, H4C9, CFAP70, GP6, RPE65, GJB4, PAH, SLC22A7,…	1269	2076	13625	1.10161	0.996261	0.283869	0.232918
GNF_U133A_QUARTILE	Cingulate Cortex_3rd	219	7.64932	0.0746368	SPON1, IL1RN, ZMYND8, CPNE6, AQP6, FCF1, ANTXR1, TMEM92, ANP32A-IT1, ISLR, VPREB1, EDNRB, PSMD5, TRIM29, SOX15, CHEK1, MAGEA2, THSD7A, TNS1, SLC11A1, PSG1, ARMC9, HNF1B, KNL1, CH25H, CTAGE4, TFR2, MAP1A, MAGEB2, CTAGE9, SERPING1, ZNF711, SNORA21, HOXB7, CFTR, CFB, BLZF1, EPHA3, FAXDC2, SHOX2, PIK3R4, LPAR4, MEFV, MST1L, CRHR2, ARSJ, MAGEC1, ZNF268, TSPAN1, SULT1A4, MAP9, SULT1A3, ABCA1, BTF3, SIG…	1269	2144	13625	1.09672	0.997643	0.291083	0.238838
GNF_U133A_QUARTILE	TemporalLobe_3rd	286	9.98952	0.0887606	IL1RN, ZMYND8, FCF1, PKD2L1, ANTXR1, RAPGEFL1, ANP32A-IT1, TP53AIP1, ENDOU, NDST1, CYP2D6, PSMD5, TRIM29, SOX15, CHEK1, TNFSF10, MTERF1, MYOZ3, GNAT1, THSD7A, LGALS7, HERC6, COG7, MBNL2, RBFOX2, KRT4, ZNF160, SLC11A1, PSG1, ARMC9, FLT3LG, RNASE2, PSG8, MYL7, IFI27, PSG4, PSG7, MYL3, MAP1A, MAGEB2, ZNF711, SNORA21, CFTR, BLZF1, EPHA3, CES1, CES1P1, FAXDC2, SHOX2, PIK3R4, KLK5, MTMR8, GATA4, LPAR4,…	1269	2857	13625	1.07481	0.99929	0.329682	0.270509
UNIGENE_EST_QUARTILE	placenta_normal_3rd	415	14.4953	0.0497437	SPAAR, SLC4A1, ENDOU, RNF115, SOX15, LINC01502, PRSS8, SDS, TEX55, SOX14, GTPBP8, CTAGE1, TFR2, MYL3, LINC00523, PIH1D2, SERPING1, LINC00885, SHOX2, CLCNKA, GATA4, PLA2G5, BLOC1S4, C12ORF57, ADAMTS13, ALX4, ZNF268, SULT1A2, ABCA1, NFE2, GPR17, FUCA2, MED15P9, FLI1, MOV10, BHMT, TCN2, POM121L8P, ZFAT, PNOC, WDR5B, NMT1, DCHS1, ZNF582-DT, SIGLEC9, HRCT1, PTH1R, HIF3A, ABCC13, TRIM6, JPH2, C1QTNF6, …	1704	4043	17825	1.07375	0.979303	0.378052	0.35318
HPA_RNA_TISSUE	kidney	61	2.13063	0.0980645	ACY3, GAL3ST1, AQP6, KLHDC7A, SSC4D, PTH1R, TSPAN12, CDH6, SLC25A48, TRIM6, EFHD1, THSD7A, AVPR2, PIPOX, HNF1B, HNF1A, PDZK1, PAX8, S100A5, CDH16, FREM2, TMEM106A, ATP6V1B1, GRB7, FOXC2, SLC22A6, DDC, PLPPR1, MCCD1, CLCNKA, SLC5A10, SMIM6, LOXHD1, SCIN, ERICH4, BSND, ALX1, TSPAN1, NTNG1, AOC1, GLYATL1, HELT, DMRT2, GDF15, FMO1, FMO4, PDZK1IP1, ARHGAP24, ACSF2, SLC2A9, FAM167B, BHMT, DAO, NPHS1, T…	1213	458	10914	1.19836	0.973014	0.611673	0.611673
HPA_RNA_TISSUE	placenta	43	1.50192	0.0449066	RTL1, CETP, CGB8, COL11A1, CGB5, WFDC1, F13A1, PSG11, CGB3, FOXO4, PCDH12, SCIN, EDNRB, C1QTNF6, HSD17B1, PDPN, HSD17B2, CYTL1, SLC38A9, MEST, MAGEA10, ADAMTS6, JAM2, AOC1, LVRN, SEMA6D, PSG1, SOX14, TBX5, KISS1, PSG9, PSG8, VCAN, MYCN, PSG4, ZFAT, PSG7, ERVH48-1, APLNR, COL21A1, XAGE3, TLL1, LGR5	1213	291	10914	1.32953	0.799735	0.611673	0.611673
HPA_RNA_TISSUE	ovary	27	0.943067	0.0920532	ROBO2, PADI6, TCF23, ARX, GLT8D2, GATA4, LPAR4, FLRT2, OLFML3, HAS1, NTF3, CDH23, SCN7A, SOX4, ZIM2, PDGFRA, LAG3, HTR1E, IGFBP5, PABPC5, BST2, COL1A2, WT1, TMSB15A, CSDC2, CCDC194, CCL26	1213	179	10914	1.35717	0.96595	0.611673	0.611673
CGAP_SAGE_QUARTILE	187:mammary gland_carcinoma_3rd	67	2.3402	0.0475804	CCDC144CP, MTFMT, STEAP4, LINC00261, FCF1, RORC, C1ORF210, CSTF3-DT, TNFSF10, KRTAP5-3, BMERB1, MTREX, RRP12, LINC02591, PIPOX, GPR37L1, LOC343052, PLPP7, RINT1, GLTPD2, TBC1D2, SNURF, TRIM58, PPIEL, MKRN9P, CASC11, GRB7, PIF1, LRRC15, SLC26A2, ARHGEF25, FAXDC2, XIAP, TRMT2B, SULT1A1, APOL4, TCEAL5, RBBP5, ERBB2, CCL3, ST8SIA4, ZNF501, JAM2, LINC00632, LRRC25, GGT6, SUGT1P1, GSDMA, MOG, MX2, LIF,…	1527	570	16134	1.24195	1	1	1
CGAP_SAGE_QUARTILE	91:peritoneum_normal_3rd	154	5.37897	0.0065321	CCDC144CP, ZNF331, MYLK2, MTFMT, CSF3, STEAP4, CSF3R, TXNL4B, ITPRIP, CD81, ICAM2, RORC, SLA, CWC27, ACTG2, AQP1, RGS5, ZFYVE26, DACH1, HENMT1, FCGRT, MYC, TNFSF10, FAM53C, MYOZ3, CD177, PDGFRA, COG7, COG4, FLT3LG, PIPOX, PCOLCE, GPR37L1, DGKZ, GANC, CH25H, RINT1, GLTPD2, EID2, RAB30, ACAP1, TYROBP, SLFN11, PADI4, AIPL1, PPIEL, CES1, LINC01973, RTN2, SLC26A2, FAXDC2, LTBP4, AGAP2, PLA2G3, CFP, SO…	1527	1337	16134	1.217	0.897108	1	1
CGAP_SAGE_QUARTILE	166:skin_melanoma_3rd	88	3.0737	0.0290924	PCSK2, CCDC144CP, CCDC167, HCP5, MTFMT, MRE11, APOOP5, TXNL4B, SPEF1, CALML5, FCF1, RORC, KLHL35, CSTF3-DT, TNFSF10, SLC39A2, LGALS7, KRTDAP, BCKDHA, LINC02591, DCAKD, PIPOX, LOC100289561, ZNF98, TMEM40, AVPR1A, GPR37L1, VWA5B1, GANC, TEX19, LOC343052, PLPP7, GLTPD2, ZNF542P, TBC1D2, PMS2P3, TRIM58, PPIEL, MKRN9P, PFDN6, PIF1, LRRC15, ITIH3, TNXB, TNXA, FAXDC2, SLC41A3, PKD1L2, FRG1JP, LINC02181,…	1527	755	16134	1.23151	0.999964	1	1
CGAP_EST_QUARTILE	21842:placenta_normal_3rd	13	0.454069	0.0696191	TBC1D3B, TBC1D3F, TBC1D3H, PSG8, HAX1, PSG4, GAS6-AS1, PSG7, PSD4, ANXA6, APLNR, CLEC4G, BANP	1578	78	16356	1.7275	1	1	1
CGAP_EST_QUARTILE	14944:uncharacterized tissue_uncharacterized histology_3rd	3	0.104785	0.0762726	UNC45B, CMYA5, PDE4DIP	1578	5	16356	6.21901	1	1	1
CGAP_EST_QUARTILE	19418:prostate_neoplasia_3rd	6	0.20957	0.0642553	KCNC2, PPP1R10, FRMD4A, HIF1AN, MEF2D, EPHA3	1578	23	16356	2.70392	1	1	1
CGAP_EST_QUARTILE	28056:uncharacterized tissue_uncharacterized histology_3rd	3	0.104785	0.0762726	POM121L10P, POM121L4P, BCRP3	1578	5	16356	6.21901	1	1	1
CGAP_EST_QUARTILE	40147:lung_normal_3rd	14	0.488998	0.0680587	SLC35A2, CSF3, C1R, FAXDC2, CAV1, FHL1, DEPP1, AQP1, TNFRSF1A, SOCS2, HYAL1, LTA4H, NAXD, APOL3	1578	86	16356	1.68733	1	1	1
CGAP_EST_QUARTILE	21347:lung_neoplasia_3rd	17	0.593783	0.0758005	ABCA1, INO80B, ITPRIP, ITPK1, MICAL2, ARHGAP27, USP18, SYNE3, TNFRSF1A, MOV10, APOC1, ARFIP1, COX14, MARK4, APOC1P1, GAS7, FAM83A	1578	113	16356	1.55934	1	1	1
CGAP_EST_QUARTILE	23842:ovary_neoplasia_3rd	8	0.279427	0.0682031	ECM1, ADAMTS13, NACA, FHL1, CAPN2, CD59, NUPR1, RNF40	1578	38	16356	2.18211	1	1	1
UP_TISSUE	Uterus endothel	3	0.104785	0.0746671	SEC14L1, POLR3B, SERBP1	1762	5	18482	6.29353	1	1	1
CGAP_EST_QUARTILE	27817:uncharacterized tissue_uncharacterized histology_3rd	3	0.104785	0.0762726	POM121L10P, POM121L4P, BCRP3	1578	5	16356	6.21901	1	1	1
CGAP_EST_QUARTILE	16074:stomach_neoplasia_3rd	4	0.139714	0.0641006	CAPN2, PRSS8, SULT1A4, SULT1A3	1578	10	16356	4.14601	1	1	1
UP_TISSUE	Spinal cord	14	0.488998	0.0732801	CALCB, GEMIN2, ZMYND8, NBPF11, LOC101929599, KIF6, MOB3B, CPED1, ZFYVE16, SLITRK2, MAP1A, GBP2, HOXD9, SPG11	1762	88	18482	1.66874	1	1	1
CGAP_EST_QUARTILE	6063:mammary gland_neoplasia_3rd	7	0.244499	0.0723227	ROBO4, RNF5P1, MYC, IL34, KCNMB1, UBOX5-AS1, RNF5	1578	31	16356	2.34049	1	1	1
CGAP_EST_QUARTILE	21435:uncharacterized tissue_neoplasia_3rd	9	0.314356	0.0707302	SEC14L1, ANPEP, TLDC2, LAPTM5, LCN2, PRTN3, LTA4H, ARAP1, LTF	1578	46	16356	2.02794	1	1	1
CGAP_EST_QUARTILE	16161:stomach_normal_3rd	8	0.279427	0.0765281	C3, SP100, RBM25, CALD1, TMEM33, ZFAT, NSRP1, MARK3	1578	39	16356	2.12616	1	1	1
CGAP_EST_QUARTILE	21807:placenta_normal_3rd	6	0.20957	0.0866375	ZFYVE26, TRIM29, PDPN, TACC1, VGLL4, TNS1	1578	25	16356	2.4876	1	1	1
CGAP_EST_QUARTILE	40098:brain_normal_3rd	27	0.943067	0.0783185	SEMA5B, LRTM2, DIRAS2, SLC1A3, FRG1JP, RHOBTB2, NOL6, BRINP2, EXTL1, TAF1C, VPS50, FAM53C, NCAM1, LINC00877, ZNF343, UNC45A, VWA5A, DGKZ, RNF40, FAM133A, MED24, PRKAR1A, SRPRB, HAP1, RNF185, SFXN5, GAS7	1578	202	16356	1.38542	1	1	1
UP_TISSUE	Chondrosarcoma	9	0.314356	0.0989464	MCTS1, GAGE12F, MORN2, ARSJ, FAM13A, TMEM119, AOX1, CCT8, ARHGAP24	1762	50	18482	1.88806	1	1	1
CGAP_EST_QUARTILE	38072:brain_normal_3rd	32	1.11771	0.0978178	DPAGT1, PLPPR1, PPP1R10, PIK3R4, IWS1, RHOBTB2, HRH1, HSPH1, NARS1, QARS1, SPOCK3, MTERF1, MBP, ZIM2, BBS2, GABRA2, CD74, MOG, GABRA5, MID1IP1, SLC2A12, HARS2, AGT, ETNPPL, PLPP7, SLC25A18, TRMT6, SMCR5, LHX6, CNTN2, ZNF711, ST6GALNAC5	1578	253	16356	1.31099	1	1	1
CGAP_EST_QUARTILE	19502:uncharacterized tissue_normal_3rd	7	0.244499	0.0925533	CDKN1A, NFIX, CTAGE4, NONO, CTAGE9, GPC6, UBE2L3	1578	33	16356	2.19864	1	1	1
CGAP_EST_QUARTILE	21620:brain_neoplasia_3rd	7	0.244499	0.0925533	MACF1, NFIX, CYTH4, C1R, ITPK1, PPP2R5C, HCG4B	1578	33	16356	2.19864	1	1	1
CGAP_EST_QUARTILE	21649:brain_neoplasia_3rd	18	0.628711	0.0922716	IL6-AS1, GRIA1, MACF1, GRID2, TNXB, AHCY, TNXA, PCDHGB4, PCDHGC5, SEMA6D, PCDHGC3, PDE4DIP, NBPF11, RNF115, GNA15, MBP, MRRF, APOL3	1578	125	16356	1.49256	1	1	1
UP_TISSUE	Corpus callosum	20	0.698568	0.0907414	RPAIN, NTRK2, H4C9, TMPRSS5, CCDC126, UQCC1, PLEKHB1, TIMM23, PLD4, CNDP1, HCK, H4C15, H4C12, SPOCK3, H4C11, MBP, HIF1AN, CARS1, COPS8, SLC18B1	1762	144	18482	1.45684	1	1	1
CGAP_EST_QUARTILE	20395:testi_normal_3rd	24	0.838282	0.090208	TP53TG3B, TKTL2, ZNF540, FYTTD1, TP53TG3C, TP53TG3D, LINC00485, CFAP206, CCER1, FUT2, MLF1, GMCL2, TUBA3C, PPP3R2, TP53TG3, CTAGE4, CEP70, ESPNP, BOD1L2, CTAGE9, TRIM36, NUP88, DLD, MKRN9P	1578	178	16356	1.39753	1	1	1
CGAP_EST_QUARTILE	29988:liver_normal_3rd	26	0.908138	0.0899035	ITIH3, CRCP, CD81, NR1I3, PON1, A1BG, ASGR1, TAF1C, APOB, CD74, NOP58, SDS, AZGP1P1, SEBOX, APOA1, PDE4DIP, PPP2R5C, AGT, PROC, TFR2, SERPING1, AGXT, HPD, CFB, CLEC4G, MT1E	1578	196	16356	1.37495	1	1	1
HPA_NORMAL_TISSUE	retina	16	0.558854	0.0897336	RCVRN, CABP5, CRX, NRL, PLA2G5, RLBP1, BEST1, TRPM1, RP1L1, SIX6, CROCC, GRK7, PDE6B, AIPL1, GNAT1, VSX2	1028	111	11043	1.54843	0.996451	1	1
HPA_NORMAL_TISSUE_CELLTYPE	duodenum; enterocytes - Microvilli	30	1.04785	0.0894648	CLXN, ACY3, SH2D7, TREH, SGMS2, CALML4, SLC2A5, ACTG2, SCIN, MECOM, ANPEP, C1RL, LEO1, TLDC2, VILL, PHGR1, PDZK1, CYP4F11, DCLK1, NAALADL1, VIL1, VAMP8, CEACAM1, ARMCX2, XPNPEP2, CDHR2, TMEM119, TIMELESS, ALPG, SLC28A1	1028	241	11043	1.33721	1	1	1
UP_TISSUE	Mammary cancer	16	0.558854	0.0880511	SP100, CCNT1, GABRA5, GEMIN2, AVPR2, SLC2A5, POU5F1B, ELF3, PSMD5, SNCG, MAGED2, POTEF, TFF1, IKBKG, NUPR1, METTL17	1762	108	18482	1.55396	1	1	1
CGAP_EST_QUARTILE	40307:uteru_uncharacterized histology_3rd	13	0.454069	0.0873054	PIGT, C1R, CAV1, FHL1, HSPB7, DEPP1, AQP1, TNFRSF1A, OLFML3, LINC01502, VPS45, CD34, RAI2	1578	81	16356	1.66352	1	1	1
CGAP_EST_QUARTILE	17544:thyroid_neoplasia_3rd	6	0.20957	0.0866375	PIGT, PAX8, IGSF1, ANXA6, CAPN2, SLA	1578	25	16356	2.4876	1	1	1
CGAP_EST_QUARTILE	39179:uncharacterized tissue_uncharacterized histology_3rd	6	0.20957	0.0866375	H4C9, H4C15, PPP2R2C, H4C12, H4C11, MEST	1578	25	16356	2.4876	1	1	1
CGAP_EST_QUARTILE	40215:mammary gland_uncharacterized histology_3rd	17	0.593783	0.0857339	CCT3, RBM39, CDKN1A, PIGT, NONO, AGT, DEPP1, ELF3, TRIM29, MYC, ELF5, IDH3B, CD59, TACC1, APOL3, LTF, RPS12	1578	115	16356	1.53222	1	1	1
CGAP_EST_QUARTILE	40201:uncharacterized tissue_uncharacterized histology_3rd	14	0.488998	0.0845119	ECM1, IL1RN, C1R, EMP1, NBPF11, DEPP1, TNFRSF1A, MFAP4, ALDH3A1, GNPAT, EID1, SH3BGRL, RPS15A, FAM83A	1578	89	16356	1.63045	1	1	1
CGAP_EST_QUARTILE	19563:mammary gland_normal_3rd	7	0.244499	0.0820906	ZNF671, COL1A2, PRKAR1A, ARFIP2, TACC1, PRSS8, FLI1	1578	32	16356	2.26735	1	1	1
CGAP_EST_QUARTILE	40109:brain_normal_3rd	13	0.454069	0.0811279	SNAP25, PRORSD1P, MOG, GOT1, MID1IP1, PLEKHB1, AGT, NAP1L5, ETNPPL, MAPK10, SPOCK3, MBP, NAXD	1578	80	16356	1.68432	1	1	1
CGAP_EST_QUARTILE	40271:stomach_uncharacterized histology_3rd	17	0.593783	0.0806678	VCP, ACOT7, PIGT, FHL1, DHPS, FRG1JP, DEPP1, TNFRSF1A, RGS5, OLFML3, PSMD3, SERPING1, CD59, PRSS8, EGFL8, CD34, LTF	1578	114	16356	1.54566	1	1	1
UP_TISSUE	Articular cartilage	4	0.139714	0.079718	SLC2A9, CILP, GDF5, AQP1	1762	11	18482	3.81426	1	1	1
CGAP_EST_QUARTILE	40316:uncharacterized tissue_uncharacterized histology_3rd	16	0.558854	0.0787104	BBS2, DYNLT5, GTF2H2C, NONO, CAV1, GTF2H2, WDR46, NDC80, ARHGAP24, UBE2L3, FAM111B, RGS5, SEC14L1, CD59, CCT8, GTF2H2B	1578	105	16356	1.57943	1	1	1
CGAP_EST_QUARTILE	21471:uncharacterized tissue_neoplasia_3rd	18	0.628711	0.077485	CBX5, SYTL1, ADCY3, NBPF11, SLC2A5, RPL9, FLI1, ORC5, FANCD2, PADI4, TBL1X, LDAH, ACAD10, VGLL4, DCAF13, RNF111, GAS7, LTF	1578	122	16356	1.52927	1	1	1
UP_TISSUE	Prostatic carcinoma	9	0.314356	0.0536984	ALKBH3, STEAP4, PCDH11Y, CMTM5, MX1, BEND4, KLK4, MAGED2, TNF	1762	44	18482	2.14552	1	1	1
UP_TISSUE	Heart	78	2.72441	0.0436332	MRPS15, VIPR2, LRR1, FHL1, HSPB7, RORC, AQP7, HIF3A, ADRA1A, SGCA, HYAL1, MB, NMRK2, ADORA1, IDH3B, EFHD1, GET1, CD34, CA14, TNS1, UNC45A, UNC45B, NUDC, SRRM5, APOBEC2, PDE4D, AMT, MRPS18B, APOA1, AP3B1, PCOLCE, SHROOM4, TOMM40L, CH25H, MYL7, HAX1, SYNPO2L, PITPNM2, MYL3, KCNMA1, ATG4C, RABL3, TFF3, SERPING1, CES1, GRIA1, LSMEM2, KCNE5, NOTCH4, LTBP4, AGAP2, MTIF2, GATA4, SELENBP1, MSTO1, TOGARAM…	1762	667	18482	1.22663	1	1	1
CGAP_EST_QUARTILE	19923:brain_neoplasia_3rd	15	0.523926	0.0529893	SEMA5B, INO80B, GPR17, VIPR2, PCDHGB4, PCDHGC5, CD81, KCNIP3, CMTM5, PCDHGC3, L1CAM, SIRT2, NEU4, GDAP1L1, LIMS2	1578	91	16356	1.70852	1	1	1
CGAP_EST_QUARTILE	40296:uncharacterized tissue_uncharacterized histology_3rd	21	0.733496	0.0259883	RAB6C, RAB6D, C1R, LRRC49, PDE4DIP, EMP1, CLEC14A, PYGM, RPL9, WDR46, GANC, ZNF542P, MOV10, MED24, QARS1, DGLUCY, CAPN2, ZNF613, LTA4H, RNF185, ZNF385A	1578	131	16356	1.66157	1	1	1
UP_TISSUE	Peripheral blood leukocyte	16	0.558854	0.024667	PPP1R10, MUCL3, MRPS18B, SYTL1, LILRB3, LILRA2, TNF, GTF2H4, RASGRP4, RNF39, LTA, LTB, SCARF1, IFNL3, MICA, ABCF1	1762	91	18482	1.84426	0.999869	1	1
HPA_NORMAL_TISSUE_CELLTYPE	retina; inner nuclear layer	7	0.244499	0.024196	TRPM1, RCVRN, SIX6, CROCC, CABP5, RLBP1, VSX2	1028	25	11043	3.00782	0.997399	1	1
HPA_NORMAL_TISSUE_CELLTYPE	colon; enterocytes - Microvilli	31	1.08278	0.0235836	SLC26A2, ACY3, SGMS2, CALML4, HAPLN4, ACTG2, SULT1A1, KIAA0513, HLA-DMA, SCIN, MECOM, ANPEP, C1RL, LEO1, VILL, SULT1A4, SULT1A3, SULT1A2, CD177, PHGR1, CYP4F11, CORO2B, VIL1, VAMP8, CEACAM1, CDHR2, TMEM119, TIMELESS, TFF2, ALPG, SLC28A1	1028	222	11043	1.50004	0.996971	1	1
CGAP_EST_QUARTILE	39132:uncharacterized tissue_uncharacterized histology_3rd	7	0.244499	0.023453	KCNJ4, ADORA1, KLK14, GATA4, EPHA1, MARK4, RHBDL2	1578	24	16356	3.02313	1	1	1
CGAP_EST_QUARTILE	40263:head and neck_normal_3rd	19	0.66364	0.0228115	CAV1, FHL1, WFIKKN2, HSPB7, PDE4DIP, EMP1, CLEC14A, PYGM, ZNF45, UBOX5-AS1, SERPINB5, AQP1, TNFRSF1A, TGM1, PLPP7, ENDOU, DGLUCY, MYOZ3, CD34	1578	113	16356	1.74279	1	1	1
UP_TISSUE	Aortic smooth muscle	4	0.139714	0.0225353	VCAN, KCNMB1, KCNMA1, AGER	1762	7	18482	5.99384	0.999714	1	1
CGAP_EST_QUARTILE	40130:uncharacterized tissue_uncharacterized histology_3rd	11	0.384212	0.0220682	SH3BGRL, BHMT, PGLYRP2, C1R, SEBOX, SERPING1, A1BG, DHRS3, CFB, AGT, CES1	1578	51	16356	2.23559	1	1	1
CGAP_EST_QUARTILE	27357:uncharacterized tissue_uncharacterized histology_3rd	25	0.87321	0.0145265	GPR68, C5AR2, HTR2C, PTH1R, CRHR2, HRH1, GNA15, EDNRB, CXCR3, ADORA1, GNG8, S1PR3, PTGIR, RAB6C, RAB6D, HTR1E, AVPR2, TACR2, AVPR1A, OPRM1, HTR5A, GNG11, CCKBR, GPR182, APLNR	1578	156	16356	1.66106	1	1	1
CGAP_EST_QUARTILE	27978:uncharacterized tissue_uncharacterized histology_3rd	4	0.139714	0.0143103	POM121L10P, POM121L4P, BCRP3, APOL2	1578	6	16356	6.91001	1	1	1
UP_TISSUE	Blood	91	3.17848	0.0132335	MRS2, CSF3R, TSSK1B, STK19, SLC4A1, TNF, UBE2L3, AQP1, C4B, SIX6, CYP2D6, AKT2, MAGEA1, ITGAX, MAGEA2, UBASH3A, UTY, ZBP1, PDGFRA, UNC45B, PRM2, CD300A, SLC11A1, DHPS, EMP1, GTPBP8, HTR3A, CACNA2D4, OPRM1, F2, MAGEA2B, MYL4, NCR1, APBB1IP, DNAJC2, VCAN, PCCB, RARA, SERPING1, GRAPL, PFDN5, TP53, CFTR, CFB, CES1, LTF, ITIH3, COL11A1, AGAP2, PSG11, FOXO4, FUT2, MEFV, LTBP1, PRAM1, OSGEP, SULT1A1, SE…	1762	751	18482	1.271	0.991513	1	1
CGAP_EST_QUARTILE	21254:kidney_neoplasia_3rd	11	0.384212	0.0109116	PDGFRB, CD74, ATP5F1B, SEC14L1, PAX8, ELF3, GAS6-AS1, F13A1, MRPS21, GPC6, RNF111	1578	46	16356	2.47859	1	1	1
CGAP_EST_QUARTILE	19167:head and neck_neoplasia_3rd	7	0.244499	0.00941653	GNPAT, TBC1D3B, KCNMA1, ATP2B4, TBC1D3F, SERPINB5, TBC1D3H	1578	20	16356	3.62776	1	1	1
HPA_NORMAL_TISSUE_CELLTYPE	rectum; enterocytes - Microvilli	30	1.04785	0.00923299	SLC26A2, ACY3, SGMS2, CALML4, HAPLN4, ACTG2, DDO, SULT1A1, SCIN, MECOM, C1RL, LEO1, NCAM1, VILL, SULT1A4, SULT1A3, SULT1A2, CD177, PDGFRA, GDF15, PHGR1, CYP4F11, VIL1, VAMP8, CEACAM1, CDHR2, TMEM119, TIMELESS, TFF2, ALPG	1028	198	11043	1.62761	0.895026	1	1
CGAP_EST_QUARTILE	38079:muscle_normal_3rd	51	1.78135	0.00903702	DPAGT1, TXNL4B, CWC25, CWC27, SGCA, QARS1, ZMYM3, CA3, ARFIP2, GET1, CHRNB1, RAB6C, RAB6D, EMP1, PCOLCE, NSA2, RAB30, MYH3, DOK4, H4C15, H4C12, ZNF439, H4C11, COL21A1, UPRT, BLZF1, ZNF550, MAGEH1, AHCY, TMF1, C1R, LTBP4, PCDH12, EFNB1, SH3BGRL, SEC14L1, FLRT2, OLFML3, SLC35A2, RBM39, PRPF38B, H4C9, CAV1, NONO, SLC33A1, PDE4DIP, NPM3, MFAP4, TBCK, CDKN2AIPNL, CCL26	1578	370	16356	1.42869	1	1	1
UP_TISSUE	Esophagus	20	0.698568	0.00768093	PGLYRP4, IL1RN, H4C9, MAGEA12, FHL1, MAGEA9B, SLC1A5, SERPINB5, TGM1, MAGEA9, H4C15, SOX15, H4C12, PAX9, H4C11, RARA, LCN2, RHCG, LINC00696, CES1	1762	110	18482	1.90713	0.936733	1	1
CGAP_EST_QUARTILE	10881:mammary gland_neoplasia_3rd	8	0.279427	0.00607175	C3, NECAP2, MED24, TNXB, TNXA, ELF3, SNCG, TSEN2	1578	24	16356	3.45501	1	1	1
CGAP_EST_QUARTILE	501:liver_normal_3rd	15	0.523926	0.0055167	ITIH3, AZGP1P1, SERPINF1, SEBOX, APOA1, APOC3, CYP4F11, C3, C4B, C4A, ACOX2, APOC1, SERPING1, CFB, APOC1P1	1578	69	16356	2.25327	1	1	1
CGAP_EST_QUARTILE	31450:uncharacterized tissue_uncharacterized histology_3rd	19	0.66364	0.0016213	IL6-AS1, GABRA2, PON3, CHRNB1, CSF3, PTGIR, DDC, PON1, ICAM2, HTR3A, PLA2G5, PTGS1, TNFRSF1A, ALDH3A1, TCN2, CCKBR, CYP11A1, PCCB, ADORA1	1578	88	16356	2.2379	0.999932	1	1
CGAP_EST_QUARTILE	19889:testi_normal_3rd	9	0.314356	0.0260943	PDGFRB, RFX4, TRIM2, SLA, NAXD, ANO4, GTF2E1, ASB3, ZNF189	1578	38	16356	2.45487	1	1	1
CGAP_EST_QUARTILE	21632:brain_neoplasia_3rd	7	0.244499	0.0284139	C4B, C4A, MACF1, MRPL16, ATP2B4, NCAM1, LIMS2	1578	25	16356	2.90221	1	1	1
CGAP_EST_QUARTILE	11060:colon_neoplasia_3rd	14	0.488998	0.0289054	PRPF38B, TOR1A, SF3B3, RPL34, COX17, ARMC9, BEST1, LINC00839, VSNL1, DMD, NSRP1, DCP1A, FREM2, CFTR	1578	76	16356	1.90935	1	1	1
CGAP_EST_QUARTILE	40200:liver_normal_3rd	17	0.593783	0.0294994	UTP25, PON3, FCN2, ITIH3, HLF, C1R, SEBOX, PIPOX, A1BG, AGT, SERPINA5, NEU4, PROC, CYP2D7, SERPING1, SLC22A7, CFB	1578	100	16356	1.76205	1	1	1
HPA_NORMAL_TISSUE	endometrium	18	0.628711	0.0519222	CLXN, PDGFRA, RSPH4A, SLC26A2, PLVAP, DNAI2, CFAP70, FHL1, CTSW, C1ORF87, AQP1, VCAN, CALD1, WT1, IL2RB, CCDC181, CD68, CD34	1028	120	11043	1.61133	0.959202	1	1
HPA_NORMAL_TISSUE_CELLTYPE	bronchus; ciliated cells (cilia axoneme)	42	1.46699	0.0502618	SETD4, CLXN, NKAPD1, SPAG17, CRCP, SPEF2, SNAP23, ATP5MC2, XIAP, STMND1, DNAH9, RSPH9, CFAP206, SGMS2, PTH1R, CFAP300, CWC27, PSMB10, ENO4, TCEAL7, IFT52, CATIP, EMC3, CCDC181, CD59, EIF2B1, BBS2, NOP58, RSPH4A, DNAI2, CFAP70, CFAP157, KIF6, LZTFL1, VMP1, ARMC3, ANKRD42, TIMELESS, CFAP57, POLR1F, DNASE2, LGR5	1028	340	11043	1.32698	0.999996	1	1
CGAP_EST_QUARTILE	20572:placenta_normal_3rd	12	0.419141	0.0497846	GRB7, CSF3R, CYTH4, TNXB, COL1A2, FCER1G, TNXA, CGB8, CGB5, PLEKHA6, DCHS1, CGB3	1578	66	16356	1.88455	1	1	1
CGAP_EST_QUARTILE	21746:placenta_normal_3rd	5	0.174642	0.0495313	PSG8, PSG4, PSG7, PBDC1, RPL9	1578	15	16356	3.45501	1	1	1
CGAP_EST_QUARTILE	19822:uncharacterized tissue_neoplasia_3rd	5	0.174642	0.0495313	FAM25BP, DYNC2H1, SFPQ, NACA, FAM25A	1578	15	16356	3.45501	1	1	1
CGAP_EST_QUARTILE	40562:uncharacterized tissue_uncharacterized histology_3rd	15	0.523926	0.0489981	ITIH3, C1R, NONO, PIPOX, AGT, DEPP1, BHMT, APOL6, TFR2, PSMD3, SERPING1, VDAC1, APOL3, CFB, CES1	1578	90	16356	1.7275	1	1	1
CGAP_EST_QUARTILE	19183:head and neck_neoplasia_3rd	3	0.104785	0.0488458	DYNC2H1, SFPQ, COG7	1578	4	16356	7.77376	1	1	1
UP_TISSUE	Pulmonary artery	4	0.139714	0.0468109	TBC1D8B, C5ORF34, KCNMA1, NOX4	1762	9	18482	4.66187	1	1	1
CGAP_EST_QUARTILE	37954:uncharacterized tissue_uncharacterized histology_3rd	12	0.419141	0.0452662	CTAGE1, LINC02870, CCDC197, H4C9, CALCB, H4C15, H4C12, LTA, H4C11, ZNF99, C20ORF141, ADIG	1578	65	16356	1.91354	1	1	1
CGAP_EST_QUARTILE	16086:stomach_neoplasia_3rd	8	0.279427	0.0532554	WWOX, SH3BGRL, CBX5, COL1A2, FLRT2, PDE4DIP, ADCY3, GANC	1578	36	16356	2.30334	1	1	1
CGAP_EST_QUARTILE	21652:brain_neoplasia_3rd	15	0.523926	0.0452204	PDGFRB, GRIA1, FER1L5, TFAP2E, LTBP4, LAPTM5, ANO4, AQP1, NDST1, MAP1A, APLNR, MBP, CARS1, APOL3, LOC613206	1578	89	16356	1.74691	1	1	1
UP_TISSUE	Retina	47	1.64163	0.0417087	ZNF331, TMPRSS3, CABP5, PLEKHB1, FRMPD2, FCF1, CRX, CHM, NRL, PKD2L1, GRIK1, TULP1, PCDH18, RPL9, TRPM1, NEUROD1, ISLR, DACH1, TUBA1A, OPN1LW, GRK7, CDH23, PDE4B, DMD, MTREX, PDE6B, GNAT1, ZNF385A, RTBDN, DYNC2H1, RCVRN, ANK2, CACNA2D4, WDR13, DHRS3, TOMM40L, ARMCX3, RP1L1, ZNF542P, EID1, PCP4, GLUD2, FGF14, ELF3, OPTC, AIPL1, VSX1	1762	373	18482	1.3217	1	1	1
HPA_NORMAL_TISSUE_CELLTYPE	fallopian tube; ciliated cells (cilia axoneme)	33	1.15264	0.0409246	CLXN, CRCP, SPEF2, LTBP4, GLT8D2, DNAH9, RSPH9, PTH1R, CWC27, PSMB10, ENO4, IFT52, EMC3, CCDC181, HYDIN, CD59, TSPAN1, BBS2, DYNC2H1, NOP58, RSPH4A, DNAI2, CFAP70, CFAP157, RINT1, CDC42EP5, ARMC3, SHLD1, ANKRD42, CFAP57, POLR1F, LGR5, NGEF	1028	251	11043	1.41232	0.999961	1	1
HPA_NORMAL_TISSUE_CELLTYPE	cerebellum; processes in granular layer	28	0.977995	0.0404512	SNAP25, CPNE6, SLC1A3, RNF112, CACNG8, SNTG1, SNCG, MBP, BRD4, CD74, GPR17, LINGO1, MOG, CMTM5, MARS1, S100B, L1CAM, DCLK1, APBB1IP, GAP43, TYROBP, DAO, ZFYVE16, MAP1A, TMEM119, EFHC2, CD68, DBN1	1028	205	11043	1.46723	0.999956	1	1
UP_TISSUE	Carcinoma	10	0.349284	0.0398212	MRPL50, TPH1, RPS15A, STK11IP, TFR2, OXSM, CA9, INTS8, OSGEP, BRD4	1762	49	18482	2.14066	1	1	1
HPA_NORMAL_TISSUE_CELLTYPE	hair; cells in cortex/medulla	6	0.20957	0.039817	KRT33B, KRT33A, GSDMA, GJB4, KRT34, KRT31	1028	21	11043	3.06921	0.999948	1	1
CGAP_EST_QUARTILE	19258:cerebrum_normal_3rd	5	0.174642	0.0392302	DYNC2H1, UNC45A, ATP5F1B, ZNF302, LDAH	1578	14	16356	3.70179	1	1	1
HPA_NORMAL_TISSUE	pituitary gland	11	0.384212	0.0357375	CHST8, ADCYAP1, SIX6, TIGD4, MYO15A, NME7, COL22A1, IGSF1, WDR19, GPR50, ZBTB8B	1028	57	11043	2.07306	0.887354	1	1
HPA_NORMAL_TISSUE_CELLTYPE	pituitary gland; cells in anterior	11	0.384212	0.0357375	CHST8, ADCYAP1, SIX6, TIGD4, MYO15A, NME7, COL22A1, IGSF1, WDR19, GPR50, ZBTB8B	1028	57	11043	2.07306	0.999856	1	1
CGAP_EST_QUARTILE	29989:liver_normal_3rd	15	0.523926	0.0321471	SDS, C1R, CD81, SEBOX, APOA1, A1BG, AGT, DEPP1, SULT1A1, GJB1, VDAC1, RAB17, HPD, CES1, MT1E	1578	85	16356	1.82912	1	1	1
UP_TISSUE	Nasal polyp	4	0.139714	0.0990327	DNAH1, RPL37A, DNAH9, MUC5AC	1762	12	18482	3.49641	1	1	1
CGAP_EST_QUARTILE	16311:cerebrum_normal_3rd	6	0.20957	0.0991658	MAPK10, FSTL5, KCNMA1, HYDIN, SULT1A4, SULT1A3	1578	26	16356	2.39193	1	1	1

## Sheet: Bone
DDX11L1
ISG15
ACOT7
CAMTA1-AS2
SLC2A5
C1orf167-AS1
NPPA-AS1
RNU5E-1
SNORA59A
MIR6730
DHRS3
PDPN
CTRC
SLC25A34-AS1
HSPB7
CLCNKA
RNU1-1
ESPNP
MIR3675
RNU1-2
CROCC
MIR3972
PADI4
PADI6
ARHGEF10L
ACTL8
IGSF21
KLHDC7A
PAX7
MIR4695
PLA2G2E
LINC01757
VWA5B1
LINC00339
ZBTB40
C1QA
RPL11
MIR4425
PAFAH2
EXTL1
FAM110D
LIN28A
GPN2
NR0B2
NUDC
SYTL1
LINC02574
PPP1R8
RPA2
SMPDL3B
EYA3
MED18
TAF12-DT
TAF12
RNU11
LAPTM5
ZBTB8B
MIR552
GJB4
SFPQ
TFAP2E
MRPS15
CSF3R
EPHA10
MANEAL
UTP11
RHBDL2
PPIEL
PPT1
FOXO6-AS1
HIVEP3
GUCA2B
CCDC30
PPIH
CFAP57
MIR6733
EBNA1BP2
MPL
MIR6735
MIR6079
KLF17
RNU5F-1
MMACHC
P3R3URF
KNCN
PDZK1IP1
TAL1
STIL
MIR4421
MIR6500
TTC39A-AS1
BSND
FYB2
C1orf87
ATG4C
MIR6068
UBE2U
PDE4B
SGIP1
DYNLT5
SERBP1
LINC01788
ZRANB2-DT
ZRANB2
MSH4
DNAJB4
FUBP1
PTGFR
SAMD13
RPF1
GBP2
DNTTIP2
PLPPR5-AS1
OLFM3
COL11A1
NTNG1
HENMT1
PRPF38B
MYBPHL
CSF1
LRIF1
WNT2B
MOV10
LINC01356
OLFML3
SPAG17
TBX15
LOC105378933
EMBP1
RNVU1-4
NUDT17
RNF115
POLR3C
NBPF11
LINC02805
RNVU1-1
RNVU1-15
LOC105371215
RNVU1-18
LINC02591
H2BP2
H2BC18
H4C14
H3C14
H2AC18
H2BC20P
H3C15
H4C15
H2AC20
H2BC21
H2AC21
VPS45
LINC02988
MRPS21
TARS2
ECM1
MIR4257
SETDB1
ANXA9
GABPB2
TNFAIP8L2
RFX5-AS1
RFX5
TUFT1
CELF3
RORC
LCE1A
S100A9
S100A3
S100A14
LOC343052
HAX1
PMVK
MIR4258
LENEP
DCST1
DCST2
SLC50A1
DPM3
FDPS
POU5F1P4
MSTO1
MSTO2P
RXFP4
SSR2
SEMA4A
SLC25A44
MEF2D
LOC101928177
NES
PRCC
ETV3L
IFI16
AIM2
DCAF8-DT
DCAF8
FCER1G
TOMM40L
MIR5187
PCP4L1
DUSP12
ATF6
NUF2
RGS5
TMCO1-AS1
MIR3658
BLZF1
NME7
CCDC181
C1orf112
METTL18
NTMT2
GORAB
GORAB-AS1
PRRX1
DARS2
CENPL
ASTN1
BRINP2
CLEC20A
AXDND1
KIAA1614-AS1
RNASEL
COLGALT2
HMCN1
BRINP3-DT
CACNA1S
ASCL5
IGFN1
TNNT2
MIR5191
IPO9-AS1
ELF3
ELF3-AS1
GPR37L1
ADORA1
CHI3L1
ATP2B4
LINC00303
KISS1
PLEKHA6
PPP1R15B
CNTN2
RBBP5
RAB29
CD34
LINC02767
LAMB3
UTP25
LINC00467
RPS6KC1
TGFB2-AS1
TAF1A-AS1
TAF1A
LEFTY1
LEFTY2
LOC105373289
PRSS38
LINC02809
TRIM17
AGT
CAPN9
C1orf131
TSNAX-DISC1
TSNAX
LOC122526782
LINC01132
RBM34
HEATR1
EXO1
KIF26B-AS1
NLRP3
TRIM58
CALML5
CALML3-AS1
MIR3155A
PROSER2-AS1
UCMA
DCLRE1C
C1QL3
SLC39A12
LINC02643
ARMC3
C10orf67-AS1
GPR158
APBB1IP
PTCHD3
RAB18
HSD17B7P2
SEPTIN7P9
LINC00839
LINC01518
LINC01264
MIR5100
DEPP1
AGAP10P
GPRIN2
FAM25BP
AGAP9
GDF2
AGAP13P
AGAP12P
ARHGAP22
LRRC18
C10orf71-AS1
DRGX
TIMM23
AGAP6
ZWINT
TMEM26
ADO
PBLD
KIFBP
TACR2
COL13A1
TYSND1
NODAL
UNC5B-AS1
CDH23-AS1
C10orf105
MIR7152
CDH23
SPOCK2
CFAP70
CHCHD1
DUSP29
KCNMA1-AS3
KCNMA1
CCSER2
SNCG
FAM25A
LIPJ
CH25H
NUDT9P1
FFAR4
RRP12
HPS1-AS1
GOT1
CWF19L1
PKD2L1
HIF1AN
TLX1NB
NPM3
C10orf95
CALHM1
SH3PXD2A-AS1
TDRD1
ENO4
TIAL1
C10orf88
EEF1AKMT2
AS-PTPRE
LINC01163
CTAGE7P
LINC02870
LINC01168
SCART1
SYCE1
IFITM2
SCT
LINC02688
MUC5AC
TOLLIP
KRTAP5-3
KRTAP5-4
CD81
CARS1
MRGPRG
OR51D1
TRIM6-TRIM34
CCKBR
TIMM10B
ARFIP2
DNHD1
DCHS1
LINC02709
MICAL2
SPON1
CALCA
CALCB
LINC02751
TPH1
SLC25A51P4
LDHC
DBX1
LGR4-AS1
METTL15
KIF18A
IMMP1L
PAX6-AS1
CSTF3-DT
CSTF3
NAT10
ELF5
LOC101928510
ALKBH3
ALX4
PRDM11
LINC02687
CRY2
DGKZ
F2
MIR6745
MIR4487
C1QTNF4
MIR130A
YPEL4
CLP1
GLYATL1
LOC283194
FAM111B
DTX4
MRPL16
ZP1
SLC15A3
CD6
CD5
BEST1
LRRN4CL
WDR74
SLC22A8
FERMT3
PYGM
MIR192
MIR6750
ATG2A
GPHA2
MIR6879
SLC25A45
MIR612
CTSW
NPAS4
ACY3
MYEOV
SHANK2-AS1
KRTAP5-10
ANAPC15
MIR139
ARAP1
STARD10
PLEKHB1
MIR4696
RNF169
SPCS2
XRRA1
RPS3
SNORD15A
KLHL35
EMSY
GUCY2EP
OMP
NDUFC2
KCTD21-AS1
ALG8
RAB30-DT
ANKRD42
TMEM126A
CCDC81
MIR3166
RAB38
NOX4
NAALAD2
ANKRD49
MRE11
SRSF8
LNCRNA-IUR
MIR1260B
CFAP300
BIRC3
DYNC2H1
DDI1
GRIA4
CUL5
C11orf87
LINC02550
COLCA2
NKAPD1
PIH1D2
IL18
TEX12
NCAM1
NCAM1-AS1
TMPRSS5
HTR3A
APOC3
APOA1-AS
APOA1
TMPRSS13
MPZL2
UBE4A
ARCN1
PHLDB1
TREH
UPK2
DPAGT1
TRIM29
PANX3
ROBO4
STT3A
STT3A-AS1
CHEK1
LOC118567325
FLI1
LOC101929538
KCNJ5-AS1
TP53AIP1
LINC02551
NINJ2
NINJ2-AS1
LINC00942
LRTM2
CACNA2D4
CACNA1C-IT3
KCNA1
NTF3
TNFRSF1A
ING4
COPS7A
LAG3
CD4
C12orf57
RNU7-1
C1S
C1R
C1RL
NECAP1
POU5F1P3
CLEC12A-AS1
EIF2S3B
MAGOHB
STYK1
H4-16
RERG
KCNJ8
ABCC9
SSPN
LINC00941
DDX11-AS1
DENND5B-AS1
ALG10
ALG10B
PDZRN4
SLC38A4
CCDC184
MIR4701
TROAP-AS1
LINC02395
LINC02396
AQP6
COX14
TMPRSS12
TFCP2
LINC02874
KRT7-AS
KRT3
KRT78
MIR9898
LOC122455340
PFDN5
SP7
MIR196A2
HOXC5
MIR615
LOC100240735
CBX5
GPR84-AS1
METTL7B
TMEM198B
DNAJC14
LOC105369781
PAN2
SPRYD4
SNORD59A
ATP5F1B
NACA
PRIM1
GPR182
NDUFA4L2
GLI1
MARS1
DTX3
ARHGEF25
LOC101927583
AGAP2
MIR10527
XPOT
LINC02454
NUP107
LOC100507250
YEATS4
LGR5
TPH2
GLIPR1L2
CAPS2
SYT1
LRRIQ1
TSPAN19
ALX1
C12orf29
CCER1
SOCS2
MIR5700
MIR492
KRT19P2
SNRPF
SNRPF-DT
LTA4H
SLC17A8
GAS2L3
ANO4
LINC00485
PAH
POLR3B
RFX4
TMEM119
SELPLG
DAO
ALKBH2
MIR6760
ACAD10
TBX5
TBX5-AS1
TMEM233
SIRT4
RNU4-2
COQ5
POP5
HNF1A
CAMKK2
MIR7107
HPD
LINC02985
ZCCHC8
PITPNM2
GTF2H3
EIF2B1
LINC02405
RIMBP2
ADGRD1-AS1
ZNF268
LINC00408
LOC107984132
LOC101928697
TUBA3C
PSPC1
GRK6P1
SPATA13
TPTE2P1
NUP58
RPL21
LINC00543
CDX2
LINC00365
LINC00384
ALOX5AP
LINC00398
TEX26
TEX26-AS1
HSPH1
STARD13
RFC3
UFM1
FREM2
LINC00437
LOC101929140
KBTBD6
SMIM2
TSC22D1-AS1
COG3
ERICH6B
CPB2-AS1
ZC3H13
LINC01198
NUDT15
MED4
LOC105370203
ARL11
LINC02333
TPTE2P3
PRR20A
PRR20B
PRR20C
PRR20E
DIAPH3
LINC01075
LINC00395
KLHL1
DACH1
LINC01078
CTAGE11P
EDNRB
LOC780529
LINC00351
MIR622
GPC6
MBNL2
MIR623
CLYBL-AS3
LINC00554
ITGBL1
ARGLU1
MIR8073
COL4A2-AS2
TEX29
LINC00354
TUBGCP3
ATP11AUN
ATP11A-AS1
F10-AS1
PROZ
ADPRHL1
GAS6-AS1
C13orf46
TTC5
KLHL33
OSGEP
METTL17
SLC39A2
LOC101929718
SUPT16H
DAD1
OXA1L
RNF212B
CMTM5
MIR208A
MYH6
MHRT
MIR208B
MYH7
CPNE6
NRL
IRF9
REC8
MDP1
GMPR2
NEDD8-MDP1
TGM1
RIPK3
LINC02282
RNU6-8
RALGAPA1
PAX9
LOC112268136
CLEC14A
LINC02315
LINC02302
RPL10L
LRR1
NEMF
RN7SL3
LINC02310
RTRAF
PTGDR
OTX2-AS1
SIX6
RHOJ
LINC02324
ZFYVE26
LOC100996664
RBM25
VSX2
FCF1
AREL1
GPATCH2L
LINC01629
LOC105370579
LINC02288
MIR1260A
ADCK1
NRXN3
TTC8
LINC00642
DGLUCY
GPR68
TRIP11
ITPK1
MIR4506
ASB2
CCDC197
IFI27
SERPINA6
SERPINA2
SERPINA1
SERPINA5
TCL1B
LINC01550
MIR342
LINC00523
MIR493
RTL1
MIR379
MIR377
LOC105378183
MARK3
LINC00638
PLD4
FAM30A
CHEK2P2
MIR5701-1
LINC01193
MIR1268A
MKRN3
MAGEL2
SNURF
SNORD115-5
SNORD115-15
SNORD115-16
SNORD115-17
SNORD115-18
SNORD115-22
SNORD115-25
SNORD115-26
SNORD115-28
SNORD115-29
SNORD115-31
SNORD115-32
SNORD115-33
SNORD115-39
SNORD115-41
MIR4715
GABRA5
TRPM1
MIR1233-1
MIR1233-2
CSNK1A1P1
LOC145845
KNSTRN
NDUFAF1
LTK
MGA
GANC
SNAP23
UBR1
MAP1A
SPG11
LOC100419583
SHF
SLC28A2-AS1
SPATA5L1
EID1
GALK2
MIR4716
GABPB1-AS1
TRPM7
LEO1
MNS1
POLR2M
ALDH1A2-AS1
RNF111
MIR422A
PIF1
MTFMT
MIR4311
LCTL
LINC02206
MAP2K5
CALML4
ANP32A-IT1
LRRC49
REC114
ISLR
STRA6
CYP11A1
LINC02255
MIR4513
MIR631
MIR4313
LINGO1-AS1
LINGO1-AS2
LINGO1
SH2D7
DNAJA4
LOC100129540
ANKRD34C-AS1
LOC727751
LINC02883
MIR1276
AGBL1
NTRK3
MIR7-2
RLBP1
MIR9-3HG
RHCG
ANPEP
UNC45A
MIR3175
LETR1
IRAIN
SPATA41
PRKXP1
GCAWKR
PCSK6-AS1
MPG
MIR4717
PRSS33
PRSS30P
LINC00921
GLIS2
MIR6769A
TMEM114
LOC100130283
CARHSP1
TVP23A
CIITA
PRM2
MIR548H2
NPIPA3
NPIPA2
BMERB1
RPS15A
SYT17
CLEC19A
LYRM1
CRYM-AS1
SNX29P1
COG7
TNRC6A
IL27
NUPR1
ATP2A1
SNX29P2
LOC606724
LOC388242
MIR3680-2
SPN
MVP
TLCD3B
LOC613038
SEPTIN1
RNF40
STX1B
ZNF668
VKORC1
PRSS8
ITGAM
ITGAX
TP53TG3D
TP53TG3
TP53TG3C
CCNYL3
LOC112268173
TP53TG3HP
LINC02167
ABCC12
GNAO1-AS1
BBS2
MT4
MT1E
DOK4
DRC7
MIR6772
KIFC3
TEPP
APOOP5
LINC00920
TK2
CKLF
CKLF-CMTM1
TERB1
CDH16
PLEKHG4
ZDHHC1
DDX19A-DT
SF3B3
COG4
IL34
VAC14-AS1
HYDIN
TAT-AS1
DHX38
TXNL4B
ZFHX3-AS1
LINC01572
MLKL
WWOX
LINC01229
MAFTRR
DYNLRB2
LINC01227
C16orf46
PKD1L2
MIR6504
TAF1C
LOC654780
WFDC1
KIAA0513
LINC02139
LINC00311
MIR5093
FOXC2
FOXL1
LINC02181
BANP
LINC02182
LOC100287036
FAM157C
LOC105371430
TIMM22
SCARF1
SERPINF1
OR3A2
TRPV1
P2RX1
LINC01975
GGT6
MIR6865
SCIMP
RPAIN
NUP88
AIPL1
SLC16A11
ASGR2
MIR324
ACAP1
CHRNB1
CD68
SOX15
ALOX15B
GSG1L2
RCVRN
GAS7
TMEM238L
DNAH9
ELAC2
LINC02087
SNORD49B
SNORD49A
SNORD65
KRT17P1
TNFRSF13B
LINC02090
RAI1-AS1
SMCR5
MYO15A
LINC02076
LGALS9C
TBC1D28
GRAPL
MFAP4
RNF112
ALDH3A1
CCDC144CP
LOC100287072
LINC02088
CCDC144NL-AS1
CCDC144NL
LOC339260
LOC105371703
PYY2
SEBOX
FOXN1
ERAL1
NSRP1
MIR423
LOC105371730
C17orf75
ASIC2
UNC45B
LOC105371933
SLFN11
SLFN12
GAS2L2
RDM1
CCL3
TBC1D3B
TBC1D3I
TBC1D3H
TBC1D3F
TBC1D3L
TBC1D3G
MIR4727
CWC25
SNORA21
RPL23
MIR6779
ARL5C
NEUROD2
ERBB2
GRB7
PSMD3
CSF3
RAPGEFL1
MIR6867
RARA
RARA-AS1
GJD3
CCR7
KRTAP2-1
KRT33A
KRT31
KRT9
KRT14
GAST
HAP1
STAT5A
HSD17B1
BECN1
MIR6781
AOC3
IFI35
TMEM106A
CCDC200
LINC00910
LOC105371789
SLC4A1
MIR6783
NMT1
DCAKD
ARHGAP27
MAPK8IP1P2
STH
HOXB1
HOXB-AS1
HOXB4
MIR10A
HOXB7
MIR196A1
HOXB13
B4GALNT2
MIR6165
SGCA
TMEM92
CACNA1G-AS1
HLF
MSX2P1
TSPOAP1
MIR4736
RNF43
VMP1
PTRH2
HEATR6-DT
HEATR6
INTS2
TBC1D3P2
CYB561
GH1
CD79B
SCN4A
PRR29-AS1
ICAM2
ARSG
PRKAR1A
LINC01482
LINC01152
CD300A
CD300H
OTOP3
MRPL58
CASKIN2
SMIM6
H3-3B
PRPSAP1
LOC122455342
MXRA7
MGAT5B
LOC105371899
SNHG20
SEC14L1
SCARNA16
MIR6516
LOC100507351
LOC105371910
DNAH17
C1QTNF1-AS1
LINC01977
LINC01979
MIR1268B
NPLOC4
TSPAN10
TEX19
HEXD-IT1
CETN1
NDC80
LINC01882
MIR4526
LDLRAD4
LINC01443
ESCO1
SNRPD1
DTNA
MIR187
SIGLEC15
LOXHD1
MIR4743
MIR1539
MRO
DCC
BOD1L2
NARS1
ALPK2
GRP
SERPINB5
LOC105372179
RTTN
C18orf63
CNDP1
LINC01029
PARD6G-AS1
PRTN3
GNA15
GNA15-DT
TEKTIP1
MATK
SNORD37
STAP2
LRG1
MIR4747
CD70
C3
VAV1
RETN
PRAM1
MYO1F
ACTL9
ZNF317
ZNF266
ZNF560
ICAM4
ZGLP1
MIR1238
MIR6886
LOC105372273
ANGPTL8
MIR7974
CNN1
ZNF439
ZNF763
ZNF136
LOC100289333
DHPS
GNG14
SNORD135
RTBDN
DNASE2
NFIX
RLN3
CLEC17A
ADGRE2
BRD4
PGLYRP2
CYP4F24P
CYP4F11
FAM32A
USE1
PLVAP
CCDC194
BISPR
MVB12A
BST2
NIBAN3
SNORA68
SLC5A5
MIR3189
LRRC25
NR2C2AP
HAPLN4
ZNF14
ZNF56P
LINC00663
ZNF253
ZNF90
ZNF486
ZNF737
ZNF738
ZNF43
ZNF729
ZNF98
GOLGA2P9
ZNF99
ZNF730
ZNF724
ZNF91
LINC01224
RPSAP58
ZNF681
ZNF726
NUDT19
SLC7A9
CHST8
LINC01801
MIR6887
GPR42
LINC01531
SBSN
GAPDHS
PMIS2
ETV2
UPK1A
PSENEN
U2AF1L4
NPHS1
TYROBP
ZNF529-AS1
ZNF790
ZNF345
ZNF875
ZNF540
ZNF573
RASGRP4
CAPN12
LGALS7
LGALS7B
SIRT2
SARS2
SYCN
IFNL3
GMFG
EID2
MIR6719
FCGBP
AKT2
HIPK4
BCKDHA
EXOSC5
DMAC2
ERICH4
PCAT19
CEACAM4
LOC101930071
LIPE-AS1
CEACAM1
PSG8
PSG10P
PSG1
PSG6
PSG7
PSG11
PSG2
PSG4
PSG9
SRRM5
LOC105372412
ZNF283
ZNF45
ZNF221
ZNF230
ZNF230-DT
ZNF223
ZNF225-AS1
MIR4531
APOC1
APOC1P1
GEMIN7
MARK4
RTN2
OPA3
HIF3A
PNMA8A
PTGIR
GNG8
DACT3
MIR320E
SLC1A5
SAE1
C5AR2
SLC8A2
NOP53
SNAR-A12
SNAR-A1
SNAR-A3
CABP5
SPACA4
FUT2
IZUMO1
PLEKHA4
CGB3
CGB5
CGB8
SLC6A16
FLT3LG
SNORD33
SNORD34
SNORD35A
FCGRT
MIR6799
MED25
IL4I1
SNAR-A4
SNAR-A14
SNAR-A11
LRRC4B
SNAR-F
SNORD88B
SNORD88A
KLK1
LOC105372441
KLK3
KLK4
KLK7
KLK14
SIGLEC9
CD33
LINC01872
NKG7
SIGLEC8
SIGLEC12
SIGLEC5
HAS1
ZNF649
ZNF613
ZNF836
ZNF480
ZNF880
ZNF578
ZNF665
ZNF677
BIRC8
ZNF331
CACNG8
RPS9
LILRB3
LILRB5
LAIR1
CDC42EP5
LILRA2
LILRA1
GP6
BRSK1
LINC01864
ZNF542P
ZNF582-DT
ZNF582
ZIM2
AURKC
ZNF543
ZNF550
ZNF530
ZNF134
ZNF671
ZNF587
ZNF417
ZSCAN22
LOC105372480
A1BG
ZNF132
SLC27A5
LOC102723730
LINC01250
ALLC
LOC105373394
LOC400940
LINC00299
MIR4261
KCNF1
MYCN
VSNL1
OSR1
HS1BP3-IT1
LDAH
APOB
TDRD15
TCF23
FTH1P3
TOGARAM2
EHD3
DPY30
LTBP1
GPATCH11
HEATR5B
MORN2
COX7A2L
LINC01819
LRPPRC
PREPL
CAMKMT
LINC02583
EPCAM-DT
CHAC2
ERLEC1
ASB3
MTIF2
PRORSD1P
MDH1
WDPCP
LINC02579
LINC01829
ETAA1
CNRIP1
ANTXR1
ATP6V1B1
DUSP11
INO80B-WBP1
INO80B
MRPL53
SNAR-H
LRRTM1
MIR6071
LOC284950
MIR4436A
GGT8P
KCNIP3
LOC105373496
MIR3127
NPAS2-AS1
IL1RL2
MRPS9-AS1
C2orf49
MIR4265
LIMS3-LOC440895
LINC01123
MIR4267
LIMS4
ACOXL-AS1
ZC3H6
CHCHD5
NT5DC4
PSD4
CBWD2
RABL2A
RPL23AP7
LINC02992
EN1
C1QL2
SCTR-AS1
CNTNAP5
CNTNAP5-DT
CYP27C1
GPR17
LIMS2
SFT2D3
LOC101927881
LINC02572
LINC01856
RAB6C
FAR2P1
MED15P9
POTEF
CYP4F62P
POTEJ
CYP4F30P
RAB6D
POTEKP
ZNF285CP
FAM201B
RAB3GAP1
UBXN4
MMADHC-DT
STAM2
LINC01876
LINC01806
SLC38A11
SCN7A
HOXD12
HOXD9
RBM45
CHROMR
SCHLAP1
NEUROD1
PPP1R1C
ZNF804A
AOX1
NIF3L1
PPIL3
CFLAR
CASP8
ZDBF2
FAM237A
LINC01802
PLEKHM3
XRCC5
RPL37A
TNS1
TNS1-AS1
MIR6513
MIR6810
CATIP
VIL1
PLCD4
TUBA4B
SPEGNB
MIR3132
STK11IP
SP110
SP100
GCSIR
ARMC9
ALPG
PRSS56
EFHD1
IQCA1-AS1
IQCA1
ACKR3
COPS8
COL6A3
MIR4441
MGC16025
MIR4786
OR6B2
OR6B3
GPR35
AGXT
TRIB3
SLC52A3
SDCBP2-AS1
LOC388780
ZNF343
TMC2
IDH3B
C20orf141
TMEM239
UBOX5
GFRA4
SPEF1
LINC01730
PRND
MCM8
TRMT6
LRRN4
SNAP25
PCSK2
RBBP9
LINC00237
LOC112268271
NKX2-2
LINC00261
CST9
CST5
VSX1
FRG1BP
HM13
TPX2
FOXS1
HCK
BPIFB3
BPIFB1
AHCY
MIR499A
MIR499B
UQCC1
GDF5
FER1L4
RBM39
TLDC2
SRC
BPI
SNORA71D
ADIG
SGK2
IFT52
JPH2
GDAP1L1
R3HDML
HNF4A-AS1
CCN5
PIGT
ZSWIM3
ACOT8
ZNF663P
OCSTAMP
LOC100131496
ZMYND8
LINC00494
CSE1L
CSE1L-DT
RIPOR3-AS1
DPM1
LOC105372672
GCNT7
BMP7-AS1
LINC01742
MIR296
MIR298
EDN3
PHACTR3-AS1
LOC729296
LOC100128310
MIR1257
LINC00659
SEPTIN14P20
BAGE2
ANKRD30BP2
CYP4F29P
LOC110091776
ABCC13
MIR125B2
LINC01683
MIR155HG
JAM2
LINC01697
CCT8
GRIK1
IFNAR1
LOC101928126
LINC01426
SETD4
DSCR9
GET1
SH3BGR
B3GALT5
B3GALT5-AS1
MX2
MX1
LINC00111
SNORA91
TFF3
TFF2
CBS
LINC00322
LINC02575
KRTAP10-7
KRTAP10-11
SPATC1L
C21orf58
S100B
LINC01665
GAB4
CECR7
CECR3
USP18
GGT3P
LINC00895
CCDC188
MIR1286
RIMBP3
LOC102724751
UBE2L3
RIMBP3C
VPREB1
ZNF280B
GGTLC2
MIR650
C22orf15
LOC100652871
GSTT4
BCRP3
KIAA1671
MYO18B
CRYBB1
MIAT
MIATNB
LINC01638
ZNRF3-AS1
HORMAD2
HORMAD2-AS1
LIF-AS1
LIF
KIAA1656
SEC14L3
GAL3ST1
TCN2
PLA2G3
RNF185
MIR3928
MIR7109
YWHAH-AS1
AP1B1P1
MIR3909
MIR6069
APOL6
RBFOX2
CACNG2-DT
CACNG2
CSF2RB
IL2RB
LOC100506271
LGALS2
NOL12
GALR3
SNORA92
KCNJ4
APOBEC3B
APOBEC3B-AS1
APOBEC3C
MGAT3-AS1
LOC112268293
L3MBTL2-AS1
MIR6889
ZC3H7B
CSDC2
LOC105373044
MIR33A
CYP2D6
SCUBE1-AS1
LINC01639
EFCAB6-AS1
SHISAL1
MIR1249
LOC339685
LOC284933
MOV10L1
RPL23AP82
EMC3-AS1
EMC3
FANCD2
CIDECP1
VHL
ATP2B2-IT2
LINC00606
HRH1
VGLL4
TMEM40
LINC00620
TPRXL
GRIP2
CCDC174
LINC02011
MRPS25
EAF1
METTL6
ZNF385D
UBE2E1-AS1
OXSM
LRRC3B
GADL1
ARPP21
MLH1
MIR26A1
VILL
ENTPD3-AS1
ZNF620
CCK
GASK1A
C3orf86
ZNF501
MIR564
TMEM42
LZTFL1
LTF
MYL3
MIR711
TMEM89
MIR6890
QARS1
AMT
TRAIP
RBM6
GNAT1
HYAL1
TUSC2
GPR62
LINC00696
TLR9
MIR135A1
ITIH4-AS1
WNT5A
SPATA12
ACOX2
FAM3D
PSMD6
TMF1
SAMMSON
LINC00877
ROBO2
EPHA3
NSUN3
DHFR2
LINC00879
RPL24
NFKBIZ
LINC01990
MORC1
ABHD10
ZBTB20
GAP43
ARHGAP31
TMEM39A
COX17
GTF2E1
RABL3
SEMA5B
SLC41A3
ALDH1L1-AS1
C3orf56
PRR20G
LINC01471
KBTBD12
RUVBL1
DNAJB8
ISY1-RAB43
EFCAB12
H1-8
LINC02014
PIK3R4
MRPL3
NPHP3-AS1
SRPRB
PCCB
LINC01210
CEP70
RNF7
ZIC1
MBNL1-AS1
SLC33A1
PTX3
SHOX2
TNFSF10
KCNMB2-AS1
HTR3E-AS1
EEF1AKMT4
LINC01840
LINC02069
BCL6
SNAR-I
LRRC15
GP5
LSG1
XXYLT1-AS1
MUC4
LINC00885
ZDHHC19
LINC02012
FYTTD1
ABCA11P
PDE6B
SLC26A1
MSANTD1
LINC02171
CYTL1
MIR378D1
MRFAP1
MRFAP1L1
BLOC1S4
MIR95
SLC2A9
FGFBP2
LDB2
MED28
DHX15
WDR19
LIAS
RPL9
LOC401127
TMEM33
BEND4
GABRA2
SPATA18
LNX1-AS2
PDGFRA
TMPRSS11D
SULT1B1
NPFFR2
SDAD1
ART3
MRPL1
LINC02994
ARHGAP24
MAPK10
MEPE
HERC6
FAM13A
GRID2
ATOH1
MTTP
TRMT10A
CENPE
TACR3
CXXC4
TBCK
SGMS2
RPL34
RPL34-DT
ETNPPL
COL25A1-DT
COL25A1
ANK2
ARSJ
UGT8
METTL14
METTL14-DT
TRPC3
SLC25A31
PLK4
MGST2
ANAPC10
GATB
ARFIP1
TIGD4
TRIM2
RBM46
MAP9
FSTL5
TRIM61
TLL1
SPOCK3
DDX60L
HAND2
HPGD
GLRA3
LINC02427
HELT
FAM149A
LOC105379514
FRG1-DT
MIR4456
LINC02982
MIR4277
TAF11L3
TAF11L6
CDH18
PRDM9
CDH6
RXFP3
LOC646652
SPEF2
UGT3A2
TTC33
RPL37
CCDC152
CCL28
C5orf34
[truncated: 744 more rows]

## Sheet: Bone_DAVID
Category	Term	Count	%	PValue	Genes	List Total	Pop Hits	Pop Total	Fold Enrichment	Bonferroni	Benjamini	FDR
UNIGENE_EST_QUARTILE	normal_disease_3rd	825	30.454	6.14711e-09	PGLYRP2, CHIC1, NEXMIF, GMFG, ZDBF2, LIPJ, SAMD13, RBFOX2, CACNA2D4, CH25H, ZFYVE16, TFR2, PRKAR1A, RFX4, MYL3, CTAGE9, LINC00523, PRKXP1, PADI4, HPD, SHOX2, CLCNKA, GATA4, TEX26, GATA1, TEX29, C12ORF57, GHRHR, UGT8, ADAMTS13, KCNMB1, MOV10L1, ZNF268, GPR17, HTATSF1P2, FYB2, GLYATL1, CFAP70, NR0B2, SULT1B1, H1-4, COL1A2, ZFAT, NOX4, ZNF253, SIGLEC9, UCMA, ZNF43, LLCFC1, SHF, GGTLC2, LINC01829, PA…	1673	7605	17825	1.15582	4.6718e-07	4.6718e-07	4.61033e-07
UNIGENE_EST_QUARTILE	brain_normal_3rd	643	23.7357	1.90307e-05	PGLYRP2, CHIC1, SPAAR, NEXMIF, YWHAH-AS1, RXFP3, RNF112, MSANTD1, ZFHX4-AS1, SOX15, PRR20C, LINC01502, PRR20B, PRR20E, PRR20A, LOC613038, ACOT8, XAGE1B, XAGE1A, CH25H, ZFYVE16, PRKAR1A, RFX4, ZSCAN22, MAP1A, LINC00523, PRKXP1, PADI4, HPD, LINC00642, ASTN1, TSPYL5, TPH2, TPH1, TPTE2P3, SHOX2, AGAP2, CLCNKA, A1BG, TEX26, ANAPC10, FAM149A, TEX29, SLC5A5, C12ORF57, UGT8, HSPH1, ADAMTS13, ALX4, MOV10L…	1673	6024	17825	1.13726	0.0014453	0.000723167	0.000713652
GNF_U133A_QUARTILE	lymphomaburkittsRaji_3rd	949	35.0314	1.13869e-05	HCP5, NUP107, SCT, GMFG, TMEM92, NDST1, ZFYVE26, VPREB1, FAM110D, CYP2D6, PSMD5, AKT2, MTERF1, RBFOX2, DNTTIP2, ZNF14, CH25H, TFR2, MYL3, RFX5, RABL3, CTAGE9, PADI4, SNORA21, ATF6, HPD, ZNF273, COL13A1, SHOX2, AGAP2, MTMR8, MRPL16, CLCNKA, PLA2G3, GATA4, ZC3HAV1, MRPL13, GATA1, SLC5A5, GHRHR, UGT8, HSPH1, CFAP69, LTA4H, GTF2IRD2B, ZNF266, ABCA1, MCTS1, GPR17, MAGOHB, FLI1, SULT1B1, H1-4, NMT1, NO…	1274	9441	13625	1.07502	0.000887792	0.000888181	0.000842633
UNIGENE_EST_QUARTILE	embryo_development_3rd	811	29.9372	0.000178075	PGLYRP2, CHIC1, NEXMIF, GMFG, ZFYVE26, VPREB1, LIPJ, MTERF1, RBFOX2, TFR2, RFX4, MYL3, TMEM126A, RABL3, CTAGE9, PRKXP1, PADI4, ATF6, HPD, PIF1, ZNF273, SHOX2, CLCNKA, GATA4, ZC3HAV1, GATA1, TEX29, C12ORF57, UGT8, ADAMTS13, KCNMB1, ZNF268, GPR17, HTATSF1P2, FYB2, GLYATL1, CFAP70, NR0B2, FLI1, FAM111B, H1-4, COL1A2, NOX4, DCHS1, ZNF253, UCMA, ZNF43, SHF, GGTLC2, JPH2, PANX3, ZNF486, CHST8, RBMY1E, …	1673	7894	17825	1.0946	0.0134437	0.00451123	0.00445188
UNIGENE_EST_QUARTILE	testis_normal_3rd	660	24.3632	0.000438503	HCP5, PGLYRP2, NUP107, NEXMIF, MRGPRG, TMEM92, ZDBF2, IL4I1, FAR2P1, VPREB1, LOC650226, MSANTD1, HENMT1, LIPJ, PSMD5, SOX15, PSMD3, PRR20C, PRR20B, PRR20E, SPANXB1, SAMD13, PRR20A, RNF111, RPL21, XAGE1B, XAGE1A, DNAAF6, CACNA2D4, MED4, KNSTRN, GANC, DEPDC1B, PRKAR1A, RFX4, TMEM126A, CTAGE9, LINC00523, PIH1D2, PRKXP1, HOXB1, HPD, LINC00642, ASTN1, TSPYL5, LINC00885, CLEC20A, TPH2, ZNF273, TPTE2P3,…	1673	6353	17825	1.10688	0.0327841	0.00833155	0.00822193
HPA_RNA_TISSUE	choroid plexus	70	2.58398	0.000286708	CLXN, SPAG17, LRGUK, SPEF1, HTR2C, TREM2, EFCAB12, CALML4, CFAP300, ENO4, AQP1, CATIP, GET1, PRND, DYNC2H1, PSENEN, DYNLT5, LAG3, SERPINF1, LRRIQ1, SLC2A12, DNAAF6, SLC39A12, TUBA4B, VWA5B1, ETV3L, ARMC3, CFAP57, CHI3L1, EFHC2, MNS1, CCDC81, IQCA1, C1QA, DRC7, TPH1, LRRC18, ASMT, GDPD2, STMND1, SLC38A11, PKD1L2, DNAH9, RSPH9, TEX26, SLC5A5, CRHR2, POU5F1B, CCDC30, TOGARAM2, CCDC181, CFAP69, ALX4,…	1127	443	10914	1.53022	0.00998602	0.0103215	0.0103215
GNF_U133A_QUARTILE	WHOLE BLOOD_3rd	448	16.5375	0.000730873	SCT, RPL9, TMEM92, ISLR, ZFYVE26, PSMD5, SOX15, MTERF1, GNAT1, SPANXB1, SERPINF1, ARMC9, WDR74, CEL, CPED1, ZFYVE16, TFR2, CTAGE9, MAGEA5P, PADI4, SNORA21, HOXB7, POM121, TPH1, COL13A1, SHOX2, MTMR8, CLCNKA, GATA4, PRDM11, ANAPC10, FAM149A, KCNMB1, ZSCAN12, GTF2IRD2B, ZSCAN16, ZNF268, ABCA1, PLK4, BTF3, GPR17, RPL23AP7, DNAH17, CFAP70, GP6, MAGOHB, GP5, FLI1, PAFAH2, SULT1B1, COL1A2, GJB4, PAH, S…	1274	4239	13625	1.13027	0.0554332	0.02636	0.0250082
GNF_U133A_QUARTILE	Cerebellum_3rd	951	35.1052	0.00123051	NUP107, SCT, NDST1, ZFYVE26, VPREB1, ISLR, FAM110D, CYP2D6, PSMD5, AKT2, MTERF1, RBFOX2, ZNF14, RC3H2, CH25H, EID1, ZFYVE16, TFR2, MYL3, RFX5, RABL3, CTAGE9, PADI4, SNORA21, ATF6, HPD, ZNF273, COL13A1, SHOX2, AGAP2, MTMR8, CLCNKA, PLA2G3, GATA4, COPS7A, ZC3HAV1, MRPL13, GATA1, SLC5A5, GHRHR, ADAMTS13, CFAP69, GTF2IRD2B, ZNF268, ABCA1, MCTS1, GPR17, PRPF38B, CFAP70, MAGOHB, NR0B2, FLI1, SULT1B1, H…	1274	9668	13625	1.05199	0.0915712	0.02636	0.0250082
GNF_U133A_QUARTILE	salivarygland_3rd	996	36.7663	0.0013518	HCP5, SCT, NDST1, ZFYVE26, VPREB1, FAM110D, CYP2D6, PSMD5, AKT2, PSMD3, MTERF1, RBFOX2, ZNF14, RC3H2, CH25H, TFR2, MYL3, RFX5, RABL3, CTAGE9, PADI4, SNORA21, ATF6, HPD, ZNF273, COL13A1, SHOX2, AGAP2, MTMR8, MRPL16, CLCNKA, PLA2G3, GATA4, ZC3HAV1, GATA1, SLC5A5, GHRHR, UGT8, HSPH1, ADAMTS13, KCNMB1, CFAP69, LTA4H, GTF2IRD2B, ABCA1, GPR17, PRPF38B, MAGOHB, NR0B2, FLI1, SULT1B1, H1-4, NMT1, NOX4, DC…	1274	10176	13625	1.04677	0.100136	0.02636	0.0250082
UP_TISSUE	Plasma	48	1.77187	0.000240355	PON3, C1QA, FCGBP, ROBO4, ECM1, SERPINA1, PGLYRP2, TNXB, C1S, C1R, PON1, TNC, ICAM2, F13A1, A1BG, PTN, CFP, SERPINA6, CNDP1, SERPINA5, ASGR2, C3, C4B, CDH6, ADAMTS13, HYAL1, ANPEP, C1RL, NCAM1, APOB, JAM2, AOC3, NTRK2, AMBP, SERPINF1, ITGA1, F2, LILRB5, AGT, MFAP4, CEACAM1, LRG1, LCN2, COL6A3, CNTN2, SP8, FREM2, CFB	1748	294	18482	1.72624	0.082679	0.0862874	0.0862874
HPA_RNA_TISSUE	testis	236	8.7117	0.00864358	CCDC200, TP53TG3D, LRR1, DNHD1, TEX48, MEIKIN, MAGEA9, P3R3URF, IL4I1, TCL1B, ZNF729, PRR20G, LIPJ, MSANTD1, HENMT1, TMEM89, MAGEA1, MAGEA2, SPANXB1, TKTL1, SRRM5, SLC6A16, XAGE1B, XAGE1A, DNAAF6, KNSTRN, CARHSP1, DEPDC1B, TRIM17, ARMC3, SPATA12, PNLDC1, RFX4, MAGEB2, CTAGE9, PIH1D2, ZNF711, PPP1R42, CTAGE6, SPATA18, CTAGE15, TSPYL5, SMIM2, CLEC20A, EPHA10, TEX26, MAGEA9B, AARD, SMIM6, ART3, TEX2…	1127	1986	10914	1.15078	0.262021	0.155584	0.155584
GNF_U133A_QUARTILE	Amygdala_3rd	297	10.9635	0.0101313	HCP5, SPON1, ZMYND8, AQP6, FCF1, AQP7, CALML4, ANTXR1, TMEM92, TIAL1, TP53AIP1, PSMD5, AKT2, CHEK1, CREB3L2, ARFIP1, MTERF1, THSD7A, SPANXB1, HOXA7, ACAD10, PTGDR, TRIM23, TNS1, COG7, MBNL2, RBFOX2, PSG1, ARMC9, CEL, PSG8, PSG4, TFR2, PSG7, CTAGE9, ZNF711, MXRA7, HOXB1, SNORA21, HOXB7, CFTR, CFB, BLZF1, MT1E, ASTN1, PTGFR, SMIM2, POM121, IGSF1, SHOX2, CSTF2, PIK3R4, AGAP2, MTMR8, GATA4, ZC3HAV1, …	1274	2818	13625	1.12715	0.54809	0.158049	0.149944
UP_TISSUE	Corpus callosum	27	0.996678	0.000946137	RPAIN, TMPRSS5, CCDC126, PLEKHB1, PLD4, RNF7, CNDP1, GJC3, SPOCK3, ZNF668, HIF1AN, NTRK2, H4C9, UQCC1, TIMM23, CFLAR, MLH1, HCK, H4C15, H4C14, H4C12, RAB18, H4C11, POLR3G, CARS1, COPS8, SLC18B1	1748	144	18482	1.98248	0.288104	0.169832	0.169832
GNF_U133A_QUARTILE	Lung_3rd	301	11.1111	0.0169132	IFITM2, ZMYND8, AQP7, SLC4A1, CALML4, TCL1B, EDNRB, CYP2D6, TRIM29, SOX15, ANPEP, ARFIP2, GNAT1, SPANXB1, ACOT8, ENDOG, SERPINF1, RPL23, PSG1, WDR74, PSG2, GPR37L1, HNF1A, RC3H2, CARHSP1, IFI27, TFR2, NINJ2, MAP1A, VDAC1, TARS2, TRIB3, PADI4, HOXB1, EPHA1, HOXB7, HPD, ATF6, CFTR, CFB, EPHA3, MT1E, GRB7, ANAPC15, COL13A1, SHOX2, MTTP, MGST2, CLCNKA, GATA4, CFP, FAM149A, PRPSAP1, C3, TRPM1, CD79B, …	1274	2888	13625	1.11464	0.735659	0.219872	0.208597
GNF_U133A_QUARTILE	Smooth Muscle_3rd	392	14.4703	0.0224584	SLC4A1, TMEM92, VPREB1, ZFYVE26, CYP2D6, PSMD5, AKT2, MTERF1, GNAT1, SPANXB1, RBFOX2, ARMC9, WDR74, CEL, CPED1, TFR2, MYL3, CTAGE9, TARS2, PADI4, SNORA21, COL13A1, SHOX2, AGAP2, MTMR8, CLCNKA, PLA2G3, ANAPC10, FAM149A, LDHC, CFAP69, ZSCAN12, NUP88, ZSCAN16, ZNF268, ABCA1, PLK4, BTF3, RPL23AP7, ARPP21, CFAP70, GP6, MAGOHB, SULT1B1, PAH, SSPN, NOX4, HOXD9, ZNF253, SPEF1, ZNF43, PYGM, MED18, ASGR2, …	1274	3851	13625	1.08863	0.829961	0.250251	0.237418
GNF_U133A_QUARTILE	Pons_3rd	556	20.5242	0.0302542	SCT, DCAF8, SLC4A1, YWHAH-AS1, TMEM92, RXFP3, H2AC18, NDST1, ISLR, ZFYVE26, FAM110D, CYP2D6, PSMD5, AKT2, CREB3L2, HOXA3, MTERF1, GNAT1, SPANXB1, RNF111, ACOT8, MBNL2, RBFOX2, RPL21, ARMC9, CEL, RC3H2, CPED1, EID1, CH25H, ZFYVE16, PRKAR1A, TFR2, MAP1A, RFX5, CTAGE9, RPL24, TARS2, PADI4, HOXB1, SNORA21, ATF6, CFB, ASTN1, TSPYL5, POM121, TPH1, SHOX2, MTMR8, CLCNKA, COPS7A, MAGEA9B, CFP, PRDM11, POU…	1274	5600	13625	1.06183	0.908943	0.294979	0.279852
HPA_RNA_TISSUE	fallopian tube	44	1.62422	0.0250768	CLXN, ZCCHC12, DRC7, LRGUK, SPEF1, LRRC18, TCF23, STMND1, DNAH9, RSPH9, CFAP206, EFCAB12, CFAP300, SMIM6, ENO4, ADGRG4, CATIP, C10ORF95, TOGARAM2, HOXC5, GAS2L2, DYNLT5, FYB2, LRRIQ1, C21ORF58, RABL2A, DNAAF6, C1ORF87, PRSS33, CFAP157, TUBA4B, ARMC3, PNOC, CFAP57, DYNLRB2, C6ORF118, PPP1R42, EFHC2, MNS1, CCDC81, C22ORF15, NUP62CL, SPATA18, LGR5	1127	309	10914	1.37897	0.588884	0.300922	0.300922
GNF_U133A_QUARTILE	BM-CD105+Endothelial_3rd	383	14.1381	0.0504435	TP53TG3C, SPON1, TP53TG3D, VIPR2, ZMYND8, FCF1, ANTXR1, TMEM92, ANP32A-IT1, MAGEA9, TP53AIP1, NDST1, ISLR, ZFYVE26, PSMD5, NIPAL2, CHEK1, TNFSF10, MAGEA2, ARFIP1, MTERF1, THSD7A, SPANXB1, PTGDR, HERC6, TRIM23, TNS1, TKTL1, MBNL2, RPL21, SLC6A16, SERPINF1, RPL23, PSG1, ARMC9, FLT3LG, ANK2, HNF1A, RC3H2, PSG9, PSG8, CH25H, PSG4, PSG7, PSG6, MAGEB2, CTAGE9, MAGEA5P, ZNF711, SNORA21, CFTR, BLZF1, EPH…	1274	3818	13625	1.07283	0.982355	0.437177	0.414757
GNF_U133A_QUARTILE	Uterus_3rd	256	9.44998	0.0668444	VIPR2, ZMYND8, AQP6, FCF1, ANTXR1, TMEM92, ANP32A-IT1, MAGEA9, TP53AIP1, NDST1, ISLR, VPREB1, ZFYVE26, EDNRB, TRIM29, TNFSF10, MAGEA2, MTERF1, MYOZ3, THSD7A, SPANXB1, PTGDR, HERC6, RBFOX2, PSG1, ARMC9, DNTTIP2, ZNF14, PSG9, PSG8, CH25H, PSG4, PSG7, PSG6, MAGEB2, RABL3, CTAGE9, ZNF711, HOXB7, CFTR, CFB, BLZF1, EPHA3, PTGFR, COL13A1, SHOX2, PIK3R4, GATA4, MAGEA9B, TRPM1, ARSJ, ZSCAN12, KCNN2, MAP9,…	1274	2511	13625	1.09034	0.995467	0.483639	0.458837
GNF_U133A_QUARTILE	TONGUE_3rd	335	12.3662	0.0744059	SPON1, ZMYND8, AQP6, FCF1, DCAF8, CALML4, LDLRAD4, ANTXR1, TMEM92, ANP32A-IT1, TP53AIP1, ISLR, ZFYVE26, EDNRB, CYP2D6, PSMD5, TRIM29, CHEK1, MAGEA2, ARFIP1, MTERF1, GNAT1, THSD7A, SPANXB1, PTGDR, HERC6, TRIM23, RPL21, PSG1, ARMC9, ANK2, HCG4B, RC3H2, PSG9, PSG8, PSG4, PSG7, MAP1A, MAGEB2, CTAGE9, MAGEA5P, ZNF711, SNORA21, HOXB7, CFTR, BLZF1, EPHA3, PTGFR, POM121, ZNF273, COL13A1, SHOX2, PIK3R4, T…	1274	3341	13625	1.07235	0.997597	0.483639	0.458837
GNF_U133A_QUARTILE	Prefrontal Cortex_3rd	230	8.49022	0.071642	SPON1, VIPR2, PLEKHB1, CPNE6, DCAF8, TMEM92, NDST1, EDNRB, FAM110D, SOX15, NIPAL2, SPANXB1, ACAD10, TNS1, MBNL2, RBFOX2, PSG1, ANK2, ZNF14, PSG9, PSG8, PSG4, PSG7, MAP1A, CTAGE9, PADI4, SNORA21, ASTN1, AGAP2, MTMR8, PRDM11, FAM149A, SLC5A5, UGT8, CEP70, NUP88, ABCA1, MAPK8IP1P2, H4C9, DTNA, ARPP21, CFAP70, MICAL2, PNMA8A, EHD3, FUBP1, NMT1, NOX4, CTRC, NODAL, ZNF134, PCSK2, PCSK1, ROBO4, GTF2H2C,…	1274	2248	13625	1.0942	0.996967	0.483639	0.458837
GNF_U133A_QUARTILE	Cingulate Cortex_3rd	219	8.08416	0.0819294	SPON1, ZMYND8, CPNE6, AQP6, FCF1, ANTXR1, TMEM92, ANP32A-IT1, ISLR, VPREB1, LGALS2, EDNRB, PSMD5, TRIM29, SOX15, CHEK1, MAGEA2, THSD7A, TNS1, RPL21, PSG1, ARMC9, CH25H, TFR2, MAP1A, PSG6, MAGEB2, CTAGE9, ZNF711, SNORA21, HOXB7, CFTR, CFB, BLZF1, EPHA3, PTGFR, SHOX2, MTTP, PIK3R4, CRHR2, UGT8, ARSJ, ZSCAN12, MAGEC1, ZNF268, MAP9, ABCA1, BTF3, PLK4, SIGLEC15, RPL23AP7, H4C9, CFAP70, LIF, GP6, MAGOH…	1274	2144	13625	1.09241	0.998728	0.491576	0.466367
UNIGENE_EST_QUARTILE	bone marrow_normal_3rd	341	12.5877	0.0910454	TP53TG3C, TP53TG3D, RPL34, ZMYND8, GORAB, GMFG, DDX60L, SLC4A1, RPL9, H2AC18, UBE2L3, PSMD6, LGALS2, HENMT1, SNRPD1, MYC, NIPAL2, MAGEA2, CHAC2, RPL37, RPS12, TRIM23, ARL11, TKTL1, ALG8, RBFOX2, RPL21, ESCO1, SP110, SERPINF1, RPL23, OXSM, XAGE1B, XAGE1A, SYTL1, DNTTIP2, TXLNGY, CACNA2D4, MED4, CPED1, EID1, COX7A2L, DEPDC1B, TFR2, ZSCAN22, RPL24, SPIN2B, TARS2, TRIB3, PADI4, PPIEL, ATF6, MT1E, TME…	1673	3398	17825	1.06921	0.999293	0.492444	0.485965
UNIGENE_EST_QUARTILE	breast (mammary gland) cancer_disease_3rd	400	14.7656	0.0971929	CHIC1, H2AC18, IL4I1, RNF112, FAR2P1, ALKBH2, RNF115, PSMD6, PRSS8, SAMD13, ACOT7, ENDOG, RPL21, ARMC9, DNTTIP2, KNSTRN, RC3H2, GANC, EID1, ZFYVE16, TFR2, ZSCAN22, RABL3, SPIN2B, PIH1D2, TARS2, PRKXP1, ATF6, CFB, FREM2, TSPYL5, LINC00885, MTMR8, ZC3HAV1, PRDM11, C3, HOXC5, NUP88, ALX1, S100A14, BTF3, HTATSF1P2, STARD13, ARPP21, STARD10, GPN2, MAGOHB, NPLOC4, TCN2, PPT1, NOX4, DCHS1, ZNF138, SPEF2…	1673	4025	17825	1.05883	0.999578	0.492444	0.485965
UNIGENE_EST_QUARTILE	tongue_normal_3rd	378	13.9535	0.071417	NUP107, LRR1, FCF1, ANTXR1, AQP1, ZDBF2, RNY3, TP53AIP1, FAR2P1, IL4I1, RNF115, ZFYVE26, TRIM29, MYC, SOX15, NIPAL2, MYOZ3, HMCN1, DYNC2H1, ARL11, LOC613038, COG7, SLC6A16, COG3, SYTL1, GANC, PLPP7, PSG8, CH25H, DEPDC1B, ZFYVE16, PSG4, TFR2, PRKAR1A, PSG7, PNLDC1, MAP1A, CTAGE9, UPRT, TARS2, WDPCP, PRKXP1, HECA, MXRA7, EPHA1, ATF6, FREM2, EPHA3, TSPYL5, GRB7, TMEM161B, SHOX2, PIK3R4, PRDM11, KLK7…	1673	3760	17825	1.07112	0.996416	0.492444	0.485965
UNIGENE_EST_QUARTILE	connective tissue_normal_3rd	316	11.6648	0.0883402	NPFFR2, ZMYND8, GORAB, DDX60L, ANTXR1, RPL9, UBE2L3, AQP1, IL4I1, TCL1B, LGALS2, CLP1, ANPEP, MAGEA1, CCN5, MAGEA2, MTERF1, THSD7A, HMCN1, SP110, CPED1, PRKAR1A, MAP1A, SPATA13, UPRT, HECA, MXRA7, CCDC81, CFB, EPHA3, MT1E, TSPYL5, ARX, A1BG, CFP, GATA1, SEC14L1, ADAMTS13, ARSJ, HOXC5, ALX4, MOV10L1, LTA4H, BBS2, STAT5A, RPL23AP7, H4C9, GDF5, TMEM196, HARS2, FAM111B, EHD3, CYP27C1, BPIFB1, COL1A2,…	1673	3140	17825	1.07224	0.999114	0.492444	0.485965
UNIGENE_EST_QUARTILE	spleen_normal_3rd	326	12.034	0.0627882	GMFG, ICAM2, AQP7, SLC4A1, LDLRAD4, IL4I1, LGALS2, EDNRB, MSANTD1, HENMT1, BCRP3, NIPAL2, CCN5, CHAC2, RPS12, PTGDR, HERC6, TKTL1, SP110, SYTL1, FLT3LG, TXLNGY, CACNA2D4, HCG4B, PSG9, ZNF542P, ZFYVE16, LOC727751, TRIM17, ZSCAN22, UPRT, ZNF711, PADI4, MXRA7, CCDC81, EPHA3, PIF1, TPH2, TMEM161B, MTMR8, A1BG, ZC3HAV1, CFP, PRDM11, GSPT2, CD79B, SEC14L1, DHX38, NAALAD2, LTA4H, APOB, BANP, ZBED3, BBS2…	1673	3215	17825	1.08036	0.992761	0.492444	0.485965
UNIGENE_EST_QUARTILE	mammary gland_normal_3rd	452	16.6851	0.0414317	PGLYRP2, CHIC1, H2AC18, RNF112, FAR2P1, ALKBH2, RNF115, PSMD6, MTERF1, PRSS8, RNF111, RPL21, ARMC9, MED4, GANC, ZFYVE16, TFR2, ZSCAN22, CTAGE9, TARS2, PRKXP1, HPD, ATF6, CFB, FREM2, TSPYL5, LINC00885, TPTE2P3, SHOX2, MTMR8, A1BG, ZC3HAV1, PRDM11, ANAPC10, PRPSAP1, C3, CEP70, HOXC5, NUP88, ALX1, RHBDL2, MCTS1, HTATSF1P2, STARD13, SLC16A11, GPN2, MAGOHB, FAM111B, NPLOC4, TCN2, PPT1, NOX4, DCHS1, ZN…	1673	4489	17825	1.07281	0.959881	0.492444	0.485965
UNIGENE_EST_QUARTILE	liver_normal_3rd	324	11.9601	0.0330879	POP5, PGLYRP2, NUP107, LRR1, FCF1, AQP7, FRG1HP, SLC4A1, RPL9, TMEM92, MAGEA9, C4B, ZDBF2, ALKBH2, LGALS2, PSMD5, ANPEP, CCN5, RPL37, ACAD10, RNF111, RPS12, TKTL1, LOC613038, RPL21, SERPINF1, RPL23, VWA5B1, RC3H2, PSG8, IFI27, PSG4, TFR2, PSG7, ZSCAN22, MYL3, MAGEB2, CTAGE9, VDAC1, EPHA1, HOXB7, HPD, CFTR, CFB, BLZF1, MT1E, TMEM161B, TPTE2P3, IGSF1, MTTP, MTMR8, GATA4, A1BG, TEX26, MAGEA9B, ANAPC…	1673	3144	17825	1.09798	0.92248	0.492444	0.485965
UNIGENE_EST_QUARTILE	blood_normal_3rd	353	13.0306	0.0839989	HCP5, RPL34, GMFG, LRR1, FCF1, DDX60L, SLC4A1, LDLRAD4, UBE2L3, MAGEA9, TIAL1, RNY3, VPREB1, LOC650226, LIPJ, HENMT1, SNRPD1, MYC, ANPEP, NIPAL2, MTERF1, RPL37, DYNC2H1, ARL11, TKTL1, ACOT7, SLC6A16, SP110, OXSM, TXLNGY, CACNA2D4, GANC, COX7A2L, TRIM17, PNLDC1, MAGEB2, CTAGE9, PIH1D2, PRKXP1, HECA, PADI4, MXRA7, CCDC81, BLZF1, MT1E, ANAPC15, MTTP, MRPL16, AGAP2, KLK4, A1BG, FRG1JP, MAGEA9B, ZC3HA…	1673	3517	17825	1.06939	0.998729	0.492444	0.485965
UNIGENE_EST_QUARTILE	germ cell tumor_disease_3rd	532	19.6382	0.0673005	PGLYRP2, NUP107, NEXMIF, TMEM92, ZDBF2, IL4I1, RNF112, VPREB1, ZFYVE26, MSANTD1, HENMT1, LIPJ, PSMD5, CLP1, SOX15, PSMD3, XAGE1B, ARMC9, XAGE1A, DNTTIP2, CACNA2D4, MED4, RFX4, ZSCAN22, RABL3, SPIN2B, PIH1D2, TARS2, HOXB1, ALG10B, ASTN1, LINC00885, PIF1, TPH2, ZNF273, TPTE2P3, AGAP2, MTMR8, CLCNKA, BLOC1S4, C12ORF57, HSPH1, ADAMTS13, CEP70, ALX4, MOV10L1, NUP88, LTA4H, ZNF268, MCTS1, MAPK8IP1P2, A…	1673	5370	17825	1.05553	0.994984	0.492444	0.485965
UNIGENE_EST_QUARTILE	lung_normal_3rd	534	19.7121	0.0932139	SPAAR, GMFG, NEXMIF, RNF112, LOC650226, MTERF1, ACOT8, ENDOG, RPL21, XAGE1B, XAGE1A, DNAAF6, CH25H, EID2, RFX4, ZSCAN22, MAP1A, MYL3, TMEM126A, CTAGE9, RPL24, PIH1D2, PRKXP1, PADI4, PPIEL, HPD, FREM2, ASTN1, TSPYL5, LINC00885, TPH1, ANAPC15, SHOX2, MTMR8, MRPL16, CLCNKA, COPS7A, A1BG, TEX26, MAGEA9B, CFP, MRPL13, GATA1, TEX29, SLC5A5, C12ORF57, C3, XKRX, GHRHR, RHBDL2, GPR17, MAPK8IP1P2, RPL23AP7…	1673	5425	17825	1.04876	0.999411	0.492444	0.485965
UNIGENE_EST_QUARTILE	trachea_normal_3rd	335	12.3662	0.0719452	HCP5, CHIC1, NEXMIF, ZMYND8, GORAB, FRG1HP, DDX60L, TMEM92, AQP1, ZDBF2, EDNRB, TRIM29, NIPAL2, ARFIP2, ARFIP1, PRSS8, HMCN1, RNF111, HERC6, ESCO1, COG3, ARMC9, SYTL1, DNTTIP2, CACNA2D4, CPED1, PLPP7, ZNF542P, ZFYVE16, LOC727751, PRKAR1A, CTAGE9, PIH1D2, SPIN2B, UPRT, WDPCP, ZNF711, SPATA18, PPIEL, EPHA1, CFTR, CFB, EPHA3, ASTN1, TMEM161B, ZNF273, IGSF1, PIK3R4, FRG1JP, ZC3HAV1, GMCL2, GHRHR, SEC…	1673	3317	17825	1.07605	0.996568	0.492444	0.485965
UP_TISSUE	Peripheral blood leukocyte	18	0.664452	0.00472605	C1S, MUCL3, SYTL1, LILRA1, LILRB3, LILRA2, TNF, GTF2H4, RASGRP4, LILRB5, PSORS1C1, RNF39, LTA, LTB, SCARF1, IFNL3, MICA, ABCF1	1748	91	18482	2.09141	0.817439	0.56555	0.56555
HPA_NORMAL_TISSUE	pituitary gland	12	0.442968	0.0153299	CHST8, GH1, SIX6, TIGD4, MYO15A, NME7, COL22A1, IGSF1, WDR19, GPR50, PTN, ZBTB8B	1035	57	11043	2.24622	0.610296	0.935125	0.935125
CGAP_SAGE_QUARTILE	91:peritoneum_normal_3rd	147	5.42636	0.0167582	CCDC144CP, ZNF331, MTFMT, CSF3, STEAP4, CSF3R, TXNL4B, CD81, ICAM2, RORC, AQP1, ZDBF2, RGS5, ZFYVE26, DACH1, HENMT1, FCGRT, MYC, TNFSF10, MYOZ3, PDGFRA, COG7, RALGAPA1, COG4, FLT3LG, DNTTIP2, PCOLCE, GPR37L1, DGKZ, GANC, CH25H, RINT1, EID2, ACAP1, TYROBP, SLFN11, PADI4, AIPL1, PPIEL, S100A9, RTN2, SLC26A2, AGAP2, PLA2G3, AARD, CFP, CSF2RA, SOCS2, C3, CNN1, HSPH1, ARSJ, OCSTAMP, CMYA5, CACNA1S, SL…	1492	1337	16134	1.18894	0.997161	1	1
CGAP_SAGE_QUARTILE	166:skin_melanoma_3rd	85	3.13769	0.0400529	PCSK2, CCDC144CP, CCDC167, ZNF253, HCP5, MTFMT, MRE11, APOOP5, TXNL4B, SPEF1, CALML5, FCF1, RORC, SAYSD1, KLHL35, CSTF3-DT, OPA3, PRR20C, TNFSF10, PRR20B, PRR20E, SLC39A2, LGALS7, PRR20A, BCKDHA, AREL1, LINC02591, DCAKD, LOC100289561, ZNF98, TMEM40, GPR37L1, VWA5B1, GANC, TEX19, LOC343052, PLPP7, ZNF542P, PMS2P3, TRIM58, PPIEL, S100A9, PFDN6, IFNAR1, PIF1, LRRC15, TNXB, TNXA, SLC41A3, MGST2, PKD1…	1492	755	16134	1.21743	0.999999	1	1
UP_TISSUE	Uterus endothel	3	0.110742	0.073601	SEC14L1, POLR3B, SERBP1	1748	5	18482	6.34394	1	1	1
CGAP_EST_QUARTILE	11015:colon_neoplasia_3rd	15	0.55371	0.0712329	ABCA1, NUDC, RPS9, MTFMT, HFE, MRPS21, HCG4B, SERPINB5, DACH1, POLR3B, HEATR5B, UBN2, ZNF737, RPL37A, GBP2	1545	97	16356	1.63707	1	1	1
CGAP_EST_QUARTILE	40201:uncharacterized tissue_uncharacterized histology_3rd	14	0.516796	0.0742462	ECM1, C1S, C1R, MRFAP1, NBPF11, DEPP1, CAMKK2, TNFRSF1A, MFAP4, ALDH3A1, EID1, SH3BGRL, RPS15A, FAM83A	1545	89	16356	1.66528	1	1	1
CGAP_EST_QUARTILE	7642:placenta_neoplasia_3rd	9	0.332226	0.0710736	RPAIN, RBM3, CCNB1, NUP107, NARS1, XPOT, TUSC2, YEATS4, LOC729080	1545	47	16356	2.02718	1	1	1
UP_TISSUE	Cerebellum	127	4.68808	0.0700914	CSE1L, SLC4A1, PRDM1, YWHAH-AS1, BEST1, SCGN, CLP1, RUVBL1, GRB10, ADORA1, TMEM14A, ACOT7, ZBTB33, GPR37L1, DGKZ, DPM1, GPATCH11, H4C15, IFI27, H4C14, PRKAR1A, RFX5, H4C12, H4C11, LINC00523, NUPR1, ZNF671, IQCA1, MAGEL2, POM121, ZNF273, COX17, TPTE2P1, AGAP2, SLC38A11, DTX3, MRO, BHLHE22, MRPL13, ARHGAP22, ORC5, NEUROD1, HSPH1, POM121C, KHDC1, MOV10L1, LTA4H, ZSCAN16, MAP2K5, BANP, NTNG1, H4C9, U…	1748	1174	18482	1.14378	1	1	1
CGAP_EST_QUARTILE	19563:mammary gland_normal_3rd	7	0.258398	0.0756981	ZNF671, COL1A2, PRKAR1A, ARFIP2, TACC1, PRSS8, FLI1	1545	32	16356	2.31578	1	1	1
UP_TISSUE	Spinal cord	14	0.516796	0.069721	NPFFR2, CALCB, ZMYND8, LRRIQ1, NBPF11, KIF6, MOB3B, CPED1, ZFYVE16, MAP1A, GBP2, HOXD9, SPG11, H3-3B	1748	88	18482	1.6821	1	1	1
UP_TISSUE	Lymphoblast	43	1.5873	0.0757693	CSE1L, RPL10L, PON1, RPL11, RPL9, RPS15A, HSPH1, ATP5F1B, QARS1, IFI16, CEP70, MYO18B, CNTRL, DHX15, RPS3, ANXA6, RTTN, CCT8, ASCC3, RPS12, SLC35A2, LOC654780, RPS9, H4C9, MARS1, KRT9, SFPQ, CARHSP1, H4C15, FANCD2, PRKAR1A, NME7, H4C14, CROCC, KRT14, SERBP1, RFX5, H4C12, H4C11, RPL24, TUBGCP3, SNRPF, GLA	1748	355	18482	1.2807	1	1	1
UP_TISSUE	Blood	84	3.10078	0.072618	MRS2, KDM5C, SERPINA1, CSF3R, ITGAM, TSSK1B, STK19, SLC4A1, TNF, UBE2L3, AQP1, C4B, SIX6, CYP2D6, AKT2, MAGEA1, ITGAX, MAGEA2, UTY, PRND, PDGFRA, UNC45B, PRM2, RIPK3, CD300A, DHPS, HTR3A, CACNA2D4, F2, MAGEA2B, APBB1IP, DNAJC2, VCAN, CYP21A2, TNNT2, PCCB, RARA, CHI3L1, GRAPL, PFDN5, CFTR, CFB, LTF, COL11A1, HM13, AGAP2, PSG11, COX7A2, FUT2, CSF2RA, LTBP1, PRAM1, PSORS1C1, OSGEP, SEC14L3, KIAA0513…	1748	751	18482	1.18262	1	1	1
CGAP_EST_QUARTILE	10977:colon_neoplasia_3rd	4	0.147656	0.0779405	DAD1, POLR1F, FTH1P3, BEST1	1545	11	16356	3.8496	1	1	1
UP_TISSUE	Mammary cancer	16	0.590624	0.0835676	SP100, GABRA5, RPL10L, AVPR2, SLC2A5, POU5F1B, PSMD6, DEPDC1B, ELF3, PSMD5, PPP1R8, SNCG, POTEF, IKBKG, NUPR1, METTL17	1748	108	18482	1.5664	1	1	1
CGAP_EST_QUARTILE	21807:placenta_normal_3rd	6	0.221484	0.0806615	ZFYVE26, TRIM29, PDPN, TACC1, VGLL4, TNS1	1545	25	16356	2.54074	1	1	1
CGAP_EST_QUARTILE	46:uncharacterized tissue_neoplasia_3rd	7	0.258398	0.0959317	MRPL50, NIF3L1, PRPF38B, TIMM23, ZNF578, RBM46, NODAL	1545	34	16356	2.17955	1	1	1
CGAP_EST_QUARTILE	38122:stomach_uncharacterized histology_3rd	32	1.18125	0.0965381	UTP25, SP100, FHL1, GTF2E1, GSPT2, AQP1, MRPL3, RGS5, SH3BGRL, NARS1, OLFML3, RIOK2, LTA4H, PRSS8, GBP2, EIF2B1, CD34, ZNF189, AOC3, TRMT10A, RIPK3, GTF2H3, MFAP4, EID1, LOC727751, SSPN, RAB18, PIR, PPT1, DLD, HOXB7, LIMS2	1545	258	16356	1.31304	1	1	1
UP_TISSUE	Chondrosarcoma	9	0.332226	0.0955241	MCTS1, GAGE12F, MORN2, ARSJ, FAM13A, TMEM119, AOX1, CCT8, ARHGAP24	1748	50	18482	1.90318	1	1	1
CGAP_EST_QUARTILE	21800:placenta_normal_3rd	28	1.03359	0.0948735	PHLDB1, TNXB, PCDHGB5, TNXA, TBC1D3B, FRG1-DT, KIAA1671, TBC1D3F, TBC1D3H, AKAP12, TRIM2, DGLUCY, TLDC2, HYDIN, EFHD1, NCAM1, ACAD10, ZNF343, TNS1, PCDHGC3, PCOLCE, GANC, MIR9-3HG, ABCA11P, HAX1, DLC1, CROCC, LY6G5B	1545	220	16356	1.34736	1	1	1
UP_TISSUE	Caudate nucleus	29	1.07051	0.0948533	NFIX, PRCC, MRFAP1, GDPD2, CFAP300, RLBP1, RERG, KLK7, PTGS1, CHN2, SPOCK3, PDE6B, DSCR9, TSNAX, HARS1, ARPP21, CMTM5, KCNIP3, COL25A1-DT, C1ORF87, SLC39A12, MAPK10, PCCB, CWF19L1, HAP1, CYB561, ZNF311, DBN1, PFDN6	1748	229	18482	1.33897	1	1	1
CGAP_EST_QUARTILE	26847:lung_normal_3rd	11	0.406054	0.0969644	CLXN, ETAA1, DNAJC2, NSA2, TSPAN19, HSPA4, CCDC181, DNAH9, MNS1, NUDT15, ARGLU1	1545	67	16356	1.73807	1	1	1
UP_TISSUE	Coronary artery	10	0.36914	0.0932137	UBOX5, MRPL1, XRCC5, SSR2, RUVBL1, CARS1, GTF2H4, ASB3, DHRS3, COQ5	1748	58	18482	1.82297	1	1	1
CGAP_EST_QUARTILE	40096:cerebrum_uncharacterized histology_3rd	15	0.55371	0.0925786	SNAP25, CNRIP1, MID1IP1, PLEKHB1, MRFAP1, COPS7A, SIRT2, AGT, EID1, SH3BGRL, VSNL1, SPOCK3, RAB18, YPEL4, H3-3B	1545	101	16356	1.57224	1	1	1
CGAP_EST_QUARTILE	40670:liver_normal_3rd	6	0.221484	0.092472	H4C9, ZRANB2, H4C15, H4C14, H4C12, H4C11	1545	26	16356	2.44302	1	1	1
CGAP_EST_QUARTILE	19767:prostate_normal_3rd	11	0.406054	0.0896748	CNN1, CD74, CDKN1A, ELF3, TAF1C, NONO, SSR2, STARD10, DHRS3, BRD4, TNS1	1545	66	16356	1.7644	1	1	1
CGAP_EST_QUARTILE	872:uncharacterized tissue_uncharacterized histology_3rd	6	0.221484	0.0697085	RBFOX2, SERPINF1, CASKIN2, APOC1, RPL37, APOC1P1	1545	24	16356	2.6466	1	1	1
CGAP_EST_QUARTILE	20572:placenta_normal_3rd	11	0.406054	0.0896748	GRB7, CSF3R, TNXB, COL1A2, FCER1G, TNXA, CGB8, CGB5, PLEKHA6, DCHS1, CGB3	1545	66	16356	1.7644	1	1	1
CGAP_EST_QUARTILE	21421:uncharacterized tissue_neoplasia_3rd	8	0.295312	0.0869594	DIAPH2, GTF2H2C, TMEM167A, RPL23, RPS6, GTF2H2, GTF2H2B, CAMKK2	1545	41	16356	2.06564	1	1	1
CGAP_EST_QUARTILE	20734:genitourinary_neoplasia_3rd	9	0.332226	0.0865256	SPRYD4, XRCC5, MX2, ERBB2, C21ORF58, PDE4B, CENPL, PRSS8, MDN1	1545	49	16356	1.94444	1	1	1
CGAP_EST_QUARTILE	11497:stomach_neoplasia_3rd	12	0.442968	0.0864539	SOCS2, HSPH1, IFI16, PBDC1, FHL1, ATG2A, PMS2P3, NOX4, PPIH, LTA4H, S100A14, ZC3HAV1	1545	74	16356	1.71671	1	1	1
CGAP_EST_QUARTILE	21228:kidney_neoplasia_3rd	7	0.258398	0.0959317	AOC3, OXA1L, CD74, SNURF, SIRT2, PARP12, U2AF1L4	1545	34	16356	2.17955	1	1	1
CGAP_EST_QUARTILE	21632:brain_neoplasia_3rd	6	0.221484	0.0806615	C4B, MRPL16, MRFAP1, ATP2B4, NCAM1, LIMS2	1545	25	16356	2.54074	1	1	1
CGAP_EST_QUARTILE	39179:uncharacterized tissue_uncharacterized histology_3rd	6	0.221484	0.0806615	H4C9, H4C15, H4C14, H4C12, KLHL1, H4C11	1545	25	16356	2.54074	1	1	1
CGAP_EST_QUARTILE	16045:uteru_uncharacterized histology_3rd	5	0.18457	0.069583	OXA1L, AHCY, TMEM14A, ZNF587, RC3H2	1545	17	16356	3.11365	1	1	1
CGAP_EST_QUARTILE	834:lung_neoplasia_3rd	9	0.332226	0.0574328	CD81, TNNT2, RPL34, SSR2, RPL37A, PMS2P3, LOC100289561, TAF7, IKBKG	1545	45	16356	2.11728	1	1	1
HPA_NORMAL_TISSUE_CELLTYPE	cerebellum; processes in granular layer	27	0.996678	0.0679824	SNAP25, BRSK1, ITGAM, CPNE6, RNF112, CACNG8, SPOCK2, SNCG, BRD4, CD74, GPR17, LINGO1, CMTM5, MARS1, IL18, S100B, APBB1IP, GAP43, TYROBP, DAO, ZFYVE16, MAP1A, TMEM119, EFHC2, SAE1, CD68, DBN1	1035	205	11043	1.40526	1	1	1
HPA_NORMAL_TISSUE_CELLTYPE	appendix; enterocytes - Microvilli	28	1.03359	0.0332635	CLXN, SLC26A2, ACY3, SGMS2, CALML4, HAPLN4, DDO, PBLD, CAPN9, SCIN, ANPEP, C1RL, LEO1, TLDC2, NCAM1, VILL, S100A14, PTGDR, PDGFRA, UNC5CL, APOA1, VIL1, VCAN, CEACAM1, SLC7A9, CDHR2, TMEM119, TFF2	1035	200	11043	1.49374	0.99974	1	1
UP_TISSUE	Hematopoietic stem cell	8	0.295312	0.0318765	APOBEC3C, PSENEN, NIF3L1, PLGRKT, MRPS21, VPS45, MAGOHB, USE1	1748	33	18482	2.56321	0.999991	1	1
CGAP_EST_QUARTILE	19180:head and neck_neoplasia_3rd	7	0.258398	0.0310574	DYNC2H1, FUBP1, ZC3H13, FTH1P3, TCEAL9, CAMKMT, BEST1	1545	26	16356	2.85019	1	1	1
CGAP_EST_QUARTILE	21435:uncharacterized tissue_neoplasia_3rd	10	0.36914	0.0261075	SEC14L1, ANPEP, TLDC2, LAPTM5, LCN2, CHI3L1, PRTN3, LTA4H, ARAP1, LTF	1545	46	16356	2.30139	1	1	1
HPA_NORMAL_TISSUE_CELLTYPE	retina; inner nuclear layer	7	0.258398	0.0249348	TRPM1, RCVRN, SIX6, CROCC, CABP5, RLBP1, VSX2	1035	25	11043	2.98748	0.99789	1	1
CGAP_EST_QUARTILE	39132:uncharacterized tissue_uncharacterized histology_3rd	7	0.258398	0.0213384	KCNJ4, ADORA1, KLK14, GATA4, EPHA1, MARK4, RHBDL2	1545	24	16356	3.0877	1	1	1
UP_TISSUE	Lung	284	10.4836	0.0196508	IFITM2, GMFG, LRR1, ICAM4, RPL9, TMEM92, AQP1, MAGEA9, TIAL1, ALKBH3, NDST1, EDNRB, FAM110D, CLP1, PSMD3, CREB3L2, CCN5, ARFIP2, MYOZ3, RPL37, ISY1-RAB43, SP110, XAGE1B, XAGE1A, SYTL1, DNAAF6, ZNF14, CH25H, EID2, COX7A2L, ZFYVE16, NINJ2, SPATA13, VDAC1, TARS2, CCDC81, ALG10B, MT1E, GRB7, MRPL16, MGST2, GATA4, MAGEA9B, PRPSAP1, C12ORF57, CD79B, SEC14L1, POM121C, NUP88, ARSG, LTA4H, NTNG1, PLK4, ST…	1748	2681	18482	1.12003	0.999195	1	1
HPA_NORMAL_TISSUE_CELLTYPE	testis; preleptotene spermatocytes	204	7.53045	0.0187376	LRR1, CPNE6, H2AC18, ALKBH3, ALKBH2, ZFYVE26, CLP1, SNRPD1, MAGEA1, SAMD13, ISY1-RAB43, TKTL1, VWA5B1, CARHSP1, NIF3L1, TRIM17, RFX4, RFX5, TMEM126A, ZNF711, BLZF1, MT1E, TSPYL5, PIF1, CSTF3, CSTF2, ART3, LDHC, ZSCAN12, MAGEC1, NUP88, ZNF268, ARGLU1, NR2C2AP, H4C9, ZRANB2, XRCC4, STK11IP, XRCC5, EAF1, TYSND1, PNMA8A, TPX2, NPLOC4, H2AC20, FUBP1, TOLLIP, GPR182, H2AC21, NMT1, CCSER2, NDUFAF1, ZNF1…	1035	1903	11043	1.14377	0.990101	1	1
CGAP_EST_QUARTILE	20216:pituitary gland_neoplasia_3rd	32	1.18125	0.017464	FYTTD1, TMEM167A, COX17, COX7A2, TCEAL7, RGS5, CHCHD5, ERLEC1, FSTL5, XRRA1, ARFIP1, COX14, TMEM14A, ZIM2, H3-3B, POLR2M, ZRANB2, UTP11, ZNF184, XRCC5, NDUFC2, MLH1, ZDHHC15, EID1, MRPL50, DEPDC1B, RNF169, DAD1, RAB18, FGFR4, CKLF, CDH18	1545	222	16356	1.52597	1	1	1
HPA_NORMAL_TISSUE_CELLTYPE	pituitary gland; cells in anterior	12	0.442968	0.0153299	CHST8, GH1, SIX6, TIGD4, MYO15A, NME7, COL22A1, IGSF1, WDR19, GPR50, PTN, ZBTB8B	1035	57	11043	2.24622	0.976936	1	1
UP_TISSUE	Esophagus	19	0.701366	0.014768	H4C9, MAGEA12, FHL1, KRT78, MAGEA9B, SLC1A5, SERPINB5, TGM1, MAGEA9, H4C15, H4C14, SOX15, H4C12, PAX9, H4C11, RARA, LCN2, RHCG, LINC00696	1748	110	18482	1.82628	0.99521	1	1
CGAP_EST_QUARTILE	11060:colon_neoplasia_3rd	15	0.55371	0.0109484	PRPF38B, TOR1A, SF3B3, RPL34, COX17, ARMC9, FTH1P3, BEST1, LINC00839, VSNL1, DMD, NSRP1, FREM2, CFTR, H3-3B	1545	76	16356	2.08942	1	1	1
CGAP_EST_QUARTILE	21254:kidney_neoplasia_3rd	11	0.406054	0.00946279	PDGFRB, CD74, ATP5F1B, SEC14L1, SPRYD4, ELF3, GAS6-AS1, F13A1, MRPS21, GPC6, RNF111	1545	46	16356	2.53153	1	1	1
CGAP_EST_QUARTILE	37954:uncharacterized tissue_uncharacterized histology_3rd	14	0.516796	0.00699101	LINC02870, H4C9, CCDC197, CALCB, TEX12, ZNF99, USE1, C20ORF141, H4C15, H4C14, H4C12, H4C11, LTA, ADIG	1545	65	16356	2.28015	1	1	1
CGAP_EST_QUARTILE	501:liver_normal_3rd	15	0.55371	0.00457404	SERPINA1, AMBP, SPRYD4, AZGP1P1, SERPINF1, SEBOX, APOA1, APOC3, CYP4F11, C3, C4B, ACOX2, APOC1, CFB, APOC1P1	1545	69	16356	2.30139	1	1	1
CGAP_EST_QUARTILE	31450:uncharacterized tissue_uncharacterized histology_3rd	18	0.664452	0.00324838	IL6-AS1, GABRA2, PON3, CHRNB1, CSF3, PTGIR, DDC, PON1, ICAM2, HTR3A, PTGS1, TNFRSF1A, ALDH3A1, TCN2, CCKBR, CYP11A1, PCCB, ADORA1	1545	88	16356	2.1654	1	1	1
CGAP_EST_QUARTILE	38079:muscle_normal_3rd	54	1.99336	0.00140243	DPAGT1, TXNL4B, CWC25, PSMD6, SGCA, QARS1, ZMYM3, CA3, ARFIP2, GET1, CHRNB1, RAB6C, RAB6D, SIRT4, PCOLCE, NSA2, DOK4, H4C15, H4C14, H4C12, ZNF439, CLDN12, H4C11, COL21A1, UPRT, BLZF1, ZNF550, MAGEH1, ENY2, AHCY, TMF1, C1R, EFNB1, SH3BGRL, SEC14L1, OLFML3, SLC35A2, RBM39, PRPF38B, HARS1, H4C9, CAV1, NONO, SLC33A1, MLH1, NPM3, MFAP4, TBCK, KBTBD6, CDKN2AIPNL, DLC1, PIR, PPIL3, CCL26	1545	370	16356	1.54504	0.999769	1	1
CGAP_EST_QUARTILE	40259:mammary gland_neoplasia_3rd	26	0.959764	0.0341068	ECM1, PIGT, USP18, ABCC12, H2BC21, PSMD3, LTA4H, PRSS8, RAI2, BCKDHA, SLC35A2, RIPK3, SPRYD4, SLC52A3, SIRT2, TNFRSF1A, ELF3, KIFBP, ARMCX6, PPT1, ZP1, CYB561, PFDN6, CFB, ATP6V1B1, LTF	1545	181	16356	1.5207	1	1	1
CGAP_EST_QUARTILE	19167:head and neck_neoplasia_3rd	6	0.221484	0.0347196	TBC1D3B, KCNMA1, ATP2B4, TBC1D3F, SERPINB5, TBC1D3H	1545	20	16356	3.17592	1	1	1
CGAP_EST_QUARTILE	33754:nervou_normal_3rd	54	1.99336	0.035753	COLGALT2, MTFMT, DPY30, DUSP11, EDNRB, QARS1, GRB10, ARFIP2, GET1, TRIM27, RBM34, TMEM14A, CHCHD1, H3-3B, UNC5CL, LRRC49, COG4, RBM18, CARTPT, CPED1, CH25H, PEX3, SPATA18, DLD, MRRF, ASTN1, IFNAR1, TMEM161B, MRPL58, GSPT2, MRPL13, GMCL2, APOL6, SPOCK2, RAB29, NUP88, METTL6, VHL, SNORA71D, TCEAL9, BBS2, FDPS, MDH1, PNMA8A, GATB, RPA2, ETNPPL, CENPE, DAO, NECAP1, POLR3B, GSTA4, SRPRB, ZNF582-DT	1545	438	16356	1.30517	1	1	1
CGAP_EST_QUARTILE	27357:uncharacterized tissue_uncharacterized histology_3rd	23	0.849022	0.0366546	PTGIR, RAB6C, RAB6D, HTR1E, GPR68, C5AR2, AVPR2, TACR2, TACR3, HTR2C, HTR5A, GNG11, CRHR2, HRH1, GNA15, EDNRB, GALR3, CCKBR, CXCR3, GPR182, ADORA1, GNG8, S1PR3	1545	156	16356	1.56082	1	1	1
CGAP_EST_QUARTILE	10896:mammary gland_neoplasia_3rd	7	0.258398	0.0665818	UNC5CL, HLA-DMA, NUDC, RPS6, ASMTL-AS1, NMT1, COQ5	1545	31	16356	2.39048	1	1	1
CGAP_EST_QUARTILE	21471:uncharacterized tissue_neoplasia_3rd	18	0.664452	0.0664119	CBX5, SYTL1, NBPF11, SLC2A5, RPL9, FLI1, CAMKK2, ORC5, FANCD2, PADI4, TBL1X, LDAH, ACAD10, VGLL4, DCAF13, RNF111, GAS7, LTF	1545	122	16356	1.56193	1	1	1
CGAP_EST_QUARTILE	16392:cerebrum_normal_3rd	19	0.701366	0.0633413	ZNF540, XRCC5, C21ORF58, MRFAP1, NRXN3, RNF7, GANC, UBE2L3, PRPSAP1, TCEAL8, RBBP5, CBS, FUBP1, PIR, PPT1, KIFC3, ZKSCAN4, ZNF543, LRRC4B	1545	130	16356	1.54724	1	1	1
CGAP_EST_QUARTILE	19889:testi_normal_3rd	8	0.295312	0.0622036	PDGFRB, XRCC5, RFX4, TRIM2, ANO4, GTF2E1, ASB3, ZNF189	1545	38	16356	2.22872	1	1	1
CGAP_EST_QUARTILE	21842:placenta_normal_3rd	13	0.479882	0.0612604	TBC1D3B, TBC1D3F, TBC1D3H, ZDBF2, PSG8, HAX1, PSG4, GAS6-AS1, PSG7, PSD4, ZNF417, ANXA6, BANP	1545	78	16356	1.7644	1	1	1
CGAP_EST_QUARTILE	11396:uncharacterized tissue_neoplasia_3rd	6	0.221484	0.0596314	PRPF38B, PEX3, MAP1A, RPS6, KYAT1, NOP53	1545	23	16356	2.76167	1	1	1
CGAP_EST_QUARTILE	38123:synovium_uncharacterized histology_3rd	33	1.21816	0.0586932	DPAGT1, UTP25, PIGT, TXNL4B, FHL1, F13A1, SLC2A5, WDR46, SEC14L1, QARS1, IFI16, RBBP5, ANPEP, PDPN, METTL6, LTA4H, ASCC3, GBP2, POLR2M, PDGFRA, VTA1, CAV1, LRRC49, LOC100289561, MLH1, TOMM40L, TIMM10B, TBX15, SLFN11, PMS2P3, PPT1, SMPDL3B, CFB	1545	255	16356	1.37001	1	1	1
CGAP_EST_QUARTILE	16811:mammary gland_neoplasia_3rd	5	0.18457	0.0976831	RAB6C, RAB6D, CBX5, SYT1, LOC729080	1545	19	16356	2.7859	1	1	1
CGAP_EST_QUARTILE	40316:uncharacterized tissue_uncharacterized histology_3rd	16	0.590624	0.0682325	BBS2, DYNLT5, GTF2H2C, NONO, CAV1, GTF2H2, WDR46, NDC80, ARHGAP24, UBE2L3, FAM111B, RGS5, SEC14L1, IFI16, CCT8, GTF2H2B	1545	105	16356	1.61317	1	1	1
UP_TISSUE	Prostatic carcinoma	9	0.332226	0.0516457	ALKBH3, STEAP4, PCDH11Y, CMTM5, RPL10L, MX1, BEND4, KLK4, TNF	1748	44	18482	2.16271	1	1	1
UP_TISSUE	Glioma	3	0.110742	0.0470741	POU5F1P3, POU5F1P4, BEST1	1748	4	18482	7.92992	1	1	1
CGAP_EST_QUARTILE	19183:head and neck_neoplasia_3rd	3	0.110742	0.0469558	DYNC2H1, SFPQ, COG7	1545	4	16356	7.93981	1	1	1
CGAP_EST_QUARTILE	19822:uncharacterized tissue_neoplasia_3rd	5	0.18457	0.0463579	FAM25BP, DYNC2H1, SFPQ, NACA, FAM25A	1545	15	16356	3.5288	1	1	1
CGAP_EST_QUARTILE	21746:placenta_normal_3rd	5	0.18457	0.0463579	PSG8, PSG4, PSG7, PBDC1, RPL9	1545	15	16356	3.5288	1	1	1
UP_TISSUE	Pulmonary artery	4	0.147656	0.045866	TBC1D8B, C5ORF34, KCNMA1, NOX4	1748	9	18482	4.69921	1	1	1
CGAP_EST_QUARTILE	18960:uncharacterized tissue_uncharacterized histology_3rd	4	0.147656	0.0457058	DIAPH2, BAGE2, DCHS1, CDH18	1545	9	16356	4.70507	1	1	1
CGAP_EST_QUARTILE	40307:uteru_uncharacterized histology_3rd	14	0.516796	0.0395081	PIGT, C1S, C1R, CAV1, FHL1, HSPB7, DEPP1, AQP1, TNFRSF1A, OLFML3, LINC01502, VPS45, CD34, RAI2	1545	81	16356	1.82975	1	1	1
UP_TISSUE	Carcinoma	10	0.36914	0.0381178	MRPL50, TPH1, RPS15A, STK11IP, TFR2, OXSM, CA9, INTS8, OSGEP, BRD4	1748	49	18482	2.1578	0.999999	1	1
CGAP_EST_QUARTILE	21240:kidney_neoplasia_3rd	13	0.479882	0.0476506	LTV1, WWOX, PRCC, RPS6, STARD10, ARAP1, FTH1P3, LRPPRC, BEST1, SFPQ, EFHD1, CARS1, RUNX1T1	1545	75	16356	1.83498	1	1	1
CGAP_EST_QUARTILE	40318:uteru_uncharacterized histology_3rd	28	1.03359	0.0988287	PPP1R15B, ECM1, C1S, FHL1, GPATCH2L, WDR46, SOCS2, PRPSAP1, SEC14L1, OLFML3, PRND, AOC3, PLEKHG4, SGIP1, NONO, COG3, PCOLCE, MOB3B, TNFRSF1A, OXA1L, EID1, PRKAR1A, NACA, P2RX1, UPRT, VDAC1, HAP1, ZNF134	1545	221	16356	1.34126	1	1	1

## Sheet: Adipocyte
DDX11L1
LOC101928626
ACOT7
SLC2A5
C1orf167-AS1
NPPA-AS1
RNU5E-1
MIR6730
DHRS3
PDPN
CTRC
SLC25A34-AS1
FBLIM1
HSPB7
RNU1-1
ESPNP
MIR3675
RNU1-2
CROCC
RCC2-AS1
ARHGEF10L
IGSF21
KLHDC7A
MIR4695
AKR7L
RNF186
OTUD3
PLA2G2E
PLA2G2A
PLA2G2F
LINC01757
VWA5B1
CDA
ZBTB40
MIR6127
C1QA
MIR4253
LOC101928163
MIR4425
EXTL1
NR0B2
NUDC
PPP1R8
RPA2
SMPDL3B
SNORA73A
SNORA73B
TAF12-DT
TAF12
LAPTM5
ZBTB8B
MIR552
GJB4
SFPQ
MRPS15
MANEAL
NDUFS5
PPIEL
FOXO6-AS1
CCDC30
CFAP57
MIR6733
EBNA1BP2
C1orf210
MPL
RNU5F-1
MMACHC
FAAHP1
KNCN
EFCAB14-AS1
PDZK1IP1
TAL1
STIL
TTC39A-AS1
BSND
PCSK9
C1orf87
ATG4C
MIR6068
SGIP1
DYNLT5
SERBP1
DIRAS3
ZRANB2-DT
ZRANB2
SAMD13
RPF1
GBP2
BTBD8
RPL5
PLPPR5-AS1
PALMD
COL11A1
NTNG1
HENMT1
MYBPHL
CYMP-AS1
MOV10
OLFML3
LINC02868
SPAG17
TBX15
LOC105378933
HAO2
HAO2-IT1
HMGCS2
PDE4DIP
NUDT17
POLR3C
FMO5
BCL9
LINC02805
RNVU1-15
PFN1P2
LOC105371215
RNVU1-18
H2BP2
H2BC18
H4C14
H3C14
H2AC18
H2BC20P
H3C15
VPS45
TARS2
ECM1
GABPB2
RFX5-AS1
RFX5
SELENBP1
TUFT1
RORC
LCE1A
S100A12
S100A5
S100A3
S100A14
HAX1
PMVK
PBXIP1
MIR4258
LENEP
DCST1
DCST2
SLC50A1
DPM3
RXFP4
SSR2
MEF2D
NES
PRCC
IFI16
ACKR1
LINC01133
DCAF8
NHLH1
TOMM40L
MIR5187
PCP4L1
DUSP12
RGS5
TMCO1-AS1
MIR3658
GPA33
BLZF1
NME7
C1orf112
METTL18
GORAB
GORAB-AS1
FMO4
DARS2
ASTN1
AXDND1
KIAA1614-AS1
RNASEL
BRINP3-DT
CACNA1S
ASCL5
MIR5191
ELF3
ELF3-AS1
GPR37L1
KISS1
PPP1R15B
RBBP5
SLC26A9
MIR6769B
C1orf116
CD34
LINC02767
LAMB3
LINC00467
RPS6KC1
TGFB2-AS1
LEFTY1
MIR6742
TRIM17
AGT
MIR1182
LINC01132
RBM34
HEATR1
EXO1
KIF26B-AS1
NLRP3
TRIM58
PROSER2-AS1
DCLRE1C
STAM
STAM-DT
SLC39A12
LOC100130992
ARMC3
C10orf67-AS1
GPR158
EPC1
CCDC7
LOC101929431
HSD17B7P2
LINC01518
LINC01264
SNORD3J
LINC02881
DEPP1
GPRIN2
FAM25BP
ANTXRLP1
AGAP9
GDF2
AGAP13P
AGAP12P
TIMM23
AGAP6
ZWINT
TMEM26
ADO
KIFBP
TACR2
COL13A1
TYSND1
CDH23-AS1
C10orf105
MIR7152
CDH23
CFAP70
CHCHD1
DUSP29
KCNMA1-AS3
KCNMA1
CCSER2
SNCG
FAM25A
LIPJ
ANKRD1
FFAR4
RRP12
HPS1-AS1
GOT1
CWF19L1
PKD2L1
HIF1AN
TLX1NB
MIR3158-2
NPM3
RPEL1
CFAP43
ITPRIP
MXI1
MIR6715B
SNORA87
TDRD1
ENO4
TIAL1
C10orf88
EEF1AKMT2
LINC02870
LINC01167
LINC01168
SCART1
SYCE1
IFITM2
IFITM1
SCT
CD81
MRGPRG
TRIM6
TRIM6-TRIM34
CCKBR
TIMM10B
ARFIP2
DCHS1
LINC02709
SPON1
LINC02751
C11orf58
LINC02729
METTL15
KIF18A
DNAJC24
DCDC1
IMMP1L
PAX6-AS1
CSTF3-DT
CSTF3
NAT10
ELF5
LOC101928510
ALKBH3
ALX4
LINC02687
LINC02716
DGKZ
MIR6745
MIR4487
FAM180B
C1QTNF4
SERPING1
MIR130A
YPEL4
GLYATL1
FAM111B
MRPL16
ZP1
SLC15A3
CD6
CD5
BEST1
LRRN4CL
SLC22A8
COX8A
FERMT3
PYGM
MIR192
MIR6750
ATG2A
MIR6879
SLC25A45
MIR612
NPAS4
C11orf86
ACY3
MYEOV
SHANK2-AS1
KRTAP5-10
IL18BP
ANAPC15
FOLR3
MIR139
ARAP1-AS2
ARAP1
STARD10
RNF169
RPS3
SNORD15A
MOGAT2
GUCY2EP
OMP
NDUFC2
KCTD21-AS1
ALG8
RAB30-DT
ANKRD42
ANKRD42-DT
TMEM126A
MIR3166
NAALAD2
ANKRD49
MRE11
SRSF8
MIR1260B
CFAP300
BIRC3
DYNC2H1
CUL5
C11orf87
NKAPD1
PIH1D2
IL18
APOC3
APOA1-AS
TMPRSS13
MPZL3
UBE4A
ARCN1
TREH
DPAGT1
CCDC153
TRIM29
MIR100HG
STT3A
STT3A-AS1
CHEK1
LOC118567325
VSIG10L2
FLI1
LOC101929538
KCNJ5-AS1
TP53AIP1
LINC02551
LINC02731
NINJ2
NINJ2-AS1
CACNA2D4
NTF3
TNFRSF1A
ING4
COPS7A
C12orf57
RNU7-1
C1R
SLC2A3
NECAP1
STYK1
GPRC5D-AS1
RERG
KCNJ8
SSPN
LINC00941
ALG10B
ABCD2
CCDC184
CCNT1
MIR4701
TUBA1A
LINC02395
AQP6
COX14
TMPRSS12
TFCP2
LINC02874
KRT7-AS
KRT3
KRT78
MIR9898
LOC122455340
PFDN5
ATP5MC2
HOXC5
MIR615
LOC100240735
CBX5
GPR84-AS1
DNAJC14
PAN2
RBMS2
SNORD59A
ATP5F1B
LRP1-AS
NDUFA4L2
INHBE
GLI1
ARHGAP9
MARS1
DTX3
LOC101927583
AGAP2
CYP27B1
GIHCG
MIR10527
KICS2
XPOT
LINC02454
NUP107
LOC100507250
GLIPR1L2
CAPS2
SYT1
LRRIQ1
TSPAN19
ALX1
C12orf29
MIR5700
SNRPF
SNRPF-DT
LTA4H
SLC17A8
GAS2L3
PAH
C12orf73
POLR3B
RFX4
TMEM119
MIR6760
ACAD10
PXN
RNU4-2
OASL
MIR7107
HPD
SCARB1
LINC02405
ZNF268
LOC101928697
TUBA3C
LINC00539
SPATA13
TPTE2P1
NUP58
USP12-AS1
RPL21
CDX2
LINC00365
LINC00384
LINC00398
HSPH1
RFC3
LINC00445
LOC101929140
COG3
NUDT15
LOC105370203
LINC02333
PCDH8
PRR20E
LINC01075
LINC00395
LINC00383
LINC00351
LOC101927284
UGGT2
MBNL2
LINC01039
CLYBL-AS3
MIR8073
NAXD
TEX29
TUBGCP3
PROZ
ADPRHL1
GAS6-AS1
C13orf46
POTEM
KLHL33
OSGEP
METTL17
SUPT16H
DAD1
CMTM5
MYH6
MIR208B
MYH7
CPNE6
NRL
IRF9
REC8
MDP1
GMPR2
NEDD8-MDP1
LINC02313
PAX9
LOC112268136
CLEC14A
GEMIN2
ATL1
PTGDR
SIX6
LINC02324
LOC100996664
LOC646548
FCF1
AREL1
PROX2
BATF
GPATCH2L
LOC105370579
ADCK1
TTC8
LINC00642
LOC105370619
DGLUCY
TRIP11
MIR4506
ASB2
IFI27
SERPINA5
MIR342
SNORD112
RTL1
LOC105378183
MARK3
LINC00638
PLD4
FAM30A
CHEK2P2
MIR5701-1
LINC01193
SNURF
SNORD115-5
SNORD115-15
SNORD115-16
SNORD115-17
SNORD115-18
SNORD115-24
SNORD115-28
SNORD115-29
SNORD115-31
SNORD115-39
SNORD115-41
MIR4715
TRPM1
MIR1233-1
KNSTRN
KNL1
PPP1R14D
NDUFAF1
LTK
MGA
SNAP23
UBR1
MAP1A
LOC100419583
SHF
SLC28A2-AS1
SEMA6D
EID1
TRPM7
TMOD3
LEO1
ALDH1A2-AS1
MIR6085
MIR1272
PIF1
MTFMT
MIR4311
LRRC49
THAP10
REC114
INSYN1-AS1
ISLR
STRA6
CYP11A1
LINC02255
MIR4513
MIR631
MIR4313
LINGO1-AS1
LINGO1-AS2
LINGO1
SH2D7
DNAJA4
LOC100129540
MIR184
ANKRD34C-AS1
LOC727751
LINC02883
AGBL1
NTRK3
MIR9-3HG
RHCG
ANPEP
ZNF710-AS1
FAM174B
LETR1
MPG
MIR4717
GLIS2
LINC01570
TMEM114
LOC100130283
CARHSP1
TVP23A
MIR548H2
BMERB1
SYT17
LYRM1
CRYM-AS1
PLK1
NUPR1
ATP2A1
SNX29P2
LOC606724
LOC388242
TLCD3B
LOC613038
SEPTIN1
RNF40
STX1B
PRSS8
LINC02167
ABCC12
CES1
GNAO1-AS1
MT1E
MIR6863
DOK4
ADGRG5
DRC7
KIFC3
TEPP
BEAN1-AS1
TK2
CKLF
CKLF-CMTM1
TERB1
PLEKHG4
ZDHHC1
PSMB10
MIR6773
DDX19A-DT
SF3B3
COG4
IL34
TAT-AS1
TXNL4B
ZFHX3-AS1
LINC01572
PSMD7
MLKL
CHST5
DYNLRB2
LINC01227
C16orf46
PKD1L2
MIR6504
TAF1C
LOC654780
WFDC1
KIAA0513
LINC02139
MIR5093
LOC101928682
JPH3
BANP
CDK10
SNORA119
SCARF1
P2RX1
LINC01975
GGT6
CHRNE
SCIMP
RPAIN
NUP88
AIPL1
SLC16A11
ACADVL
MIR324
CHRNB1
CD68
SOX15
TMEM238L
ELAC2
LINC02087
KRT17P1
TBC1D27P
RAI1-AS1
MYO15A
LINC02076
LGALS9C
PRPSAP2
SNORD3B-1
SNORD3D
SNORD3A
MFAP4
RNF112
ALDH3A1
CCDC144CP
CCDC144NL-AS1
CCDC144NL
LOC339260
DHRS7B
LOC105371703
LGALS9
ERAL1
SPACA3
ASIC2
SLFN11
GAS2L2
RDM1
TBC1D3H
HNF1B
TBC1D3L
MIR4727
CWC25
SNORA21
RPL23
MIR6779
ERBB2
PGAP3
GRB7
PSMD3
MIR6867
RARA
CCR7
KRT20
KRTAP2-1
KRTAP4-9
KRTAP4-5
KRT34
KRT13
KRT15
KRT9
HAP1
STAT5A
BECN1
MIR6781
AOC2
AOC3
IFI35
TMEM106A
LINC00910
DHX8
SOST
LOC105371789
MIR6783
NMT1
DCAKD
ARHGAP27
MAPK8IP1P2
STH
HOXB-AS1
HOXB-AS2
MIR10A
HOXB5
HOXB7
MIR196A1
HOXB13
MIR6165
SGCA
TMEM92
ACSF2
CACNA1G-AS1
MIR8059
ANKRD40CL
WFIKKN2
HLF
RNF126P1
TSPOAP1
RNF43
VMP1
PTRH2
HEATR6-DT
HEATR6
CYB561
TACO1
CD79B
SCN4A
LINC02563
PRKAR1A
LINC01152
CD300A
FDXR
OTOP3
MRPL58
CASKIN2
SMIM6
SAP30BP
RECQL5
PRPSAP1
LINC01973
C1QTNF1-AS1
LINC01979
CARD14
NPLOC4
TEX19
MIR8078
MIR7153
LDLRAD4-AS1
SNRPD1
LOXHD1
SKOR2
MIR1539
BOD1L2
NARS1
SERPINB5
LOC105372179
RTTN
C18orf63
CNDP1
PRTN3
GNA15-DT
TEKTIP1
MATK
SNORD37
CREB3L3
LRG1
CD70
C3
VAV1
PRAM1
ACTL9
ZNF317
ICAM4
MIR1238
MIR6886
LOC105372273
ANGPTL8
MIR7974
CNN1
ZNF439
ZNF763
ZNF136
DHPS
GNG14
SNORD135
RTBDN
DNASE2
NFIX
CLEC17A
BRD4
CYP4F11
LINC00905
FAM32A
USE1
PLVAP
CCDC194
BISPR
MVB12A
BST2
NIBAN3
GDF15
MIR3189
HAPLN4
ZNF14
ZNF56P
LINC00663
ZNF253
ZNF486
ZNF737
ZNF738
ZNF43
ZNF729
GOLGA2P9
ZNF99
ZNF730
ZNF724
RPSAP58
ZNF681
ZNF302
ZNF807P
LINC01801
MIR6887
LINC01531
KRTDAP
GAPDHS
ETV2
UPK1A
PSENEN
U2AF1L4
NPHS1
TYROBP
LOC105372383
ZNF529-AS1
ZNF790
ZNF345
ZNF875
ZNF573
RASGRP4
LGALS7
LGALS7B
SIRT2
SYCN
GMFG
FCGBP
AKT2
MIA-RAB4B
BCKDHA
EXOSC5
DMAC2
CEACAM4
CEACAM7
MIR6797
CNFN
LOC101930071
LIPE-AS1
CEACAM1
PSG8
PSG4
PSG9
CD177
IRGC
ZNF283
ZNF45
ZNF221
ZNF155
ZNF230
ZNF230-DT
ZNF223
ZNF234
ZNF233
ZNF112
MIR4531
APOC1
APOC1P1
GEMIN7
MARK4
RTN2
GIPR
MEIOSIN
HIF3A
PTGIR
GNG8
MIR320E
SLC1A5
SAE1
SLC8A2
TPRX2
FUT2
IZUMO1
CGB3
CGB5
CGB8
FLT3LG
FCGRT
MED25
IL4I1
SNAR-A4
SNAR-A14
SNAR-A5
SNAR-A6
SNAR-A7
SNAR-A9
SNAR-A10
SNAR-A11
SNAR-B1
LRRC4B
SNAR-F
C19orf81
SNORD88B
LOC105372441
KLK7
KLK14
C19orf84
SIGLEC12
ZNF175
LINC01530
HAS1
ZNF649
ZNF613
ZNF350
ZNF836
ZNF880
ZNF578
ZNF665
ZNF677
BIRC8
ZNF331
CACNG8
RPS9
MIR4752
LILRB2
LAIR1
CDC42EP5
KIR2DL1
KIR2DS4
GP6
BRSK1
LINC01864
ZNF582-DT
ZNF582
ZIM2
AURKC
ZNF304
ZNF134
ZNF671
ZSCAN22
A1BG
ZNF132
SLC27A5
LINC01865
LINC01250
RPS7
ALLC
LOC105373394
LOC400940
HS1BP3-IT1
LDAH
TCF23
FTH1P3
TOGARAM2
EHD3
LTBP1
MORN2
LINC01819
LRPPRC
LINC01121
LINC02583
LINC01119
STPG4
MSH2-OT1
CHAC2
ERLEC1
ASB3
MTIF2
PRORSD1P
CFAP36
MDH1
WDPCP
LINC01829
ETAA1
CNRIP1
ANTXR1
NAGK
C2orf81
INO80B-WBP1
INO80B
LRRTM1
MIR6071
GGT8P
LOC105373496
C2orf49
LINC01123
MIR4267
MIR4436B1
MTLN
ACOXL-AS1
ZC3H6
CHCHD5
IL1RN
PSD4
CBWD2
RABL2A
RPL23AP7
LINC02992
EN1
C1QL2
SCTR-AS1
PROC
IWS1
MYO7B
GPR17
SFT2D3
LINC02572
LINC01856
RAB6C
MED15P9
POTEF
POTEJ
CYP4F30P
RAB6D
POTEKP
ZNF285CP
FAM201B
UBXN4
MMADHC-DT
STAM2
LOC101929633
SCN7A
METAP1D
HOXD12
HOXD9
RBM45
CHROMR
SCHLAP1
PPP1R1C
ZNF804A
AOX1
NOP58
FAM237A
LINC01802
PLEKHM3
LINC00607
RPL37A
MIR6809
TNS1-AS1
MIR6513
MIR6810
VIL1
PLCD4
STK11IP
SP110
SP100
ARMC9
ALPG
IQCA1
ACKR3
COPS8
COL6A3
RAB17
MIR4441
OR6B3
GPR35
AGXT
NEU4
TRIB3
SLC52A3
SIRPB2
PDYN
LOC388780
ZNF343
IDH3B
C20orf141
TMEM239
UBOX5
GFRA4
SPEF1
LINC01730
LINC00654
MCM8
TRMT6
SNAP25
FLRT3
PCSK2
RBBP9
NKX2-2
LINC00261
CST5
VSX1
FRG1BP
HM13
TPX2
MYLK2
FOXS1
HCK
BPIFB3
BPIFB1
AHCY
MIR499A
MIR499B
UQCC1
FER1L4
TLDC2
BPI
IFT52
JPH2
GDAP1L1
MIR3646
CCN5
PIGT
LOC105372631
TNNC2
ZSWIM3
ACOT8
TP53RK
LOC100131496
LINC00494
CSE1L-DT
RIPOR3-AS1
DPM1
GCNT7
BMP7-AS1
MIR296
MIR298
EDN3
PHACTR3-AS1
LOC100128310
MIR1257
LINC00659
MIR10396A
ANKRD30BP2
CYP4F29P
ABCC13
MIR155HG
CCT8
CFAP298-TCP10L
LINC01426
SETD4
GET1
B3GALT5
B3GALT5-AS1
MX2
MX1
LINC00111
SNORA91
UMODL1-AS1
TFF3
TFF2
TFF1
UBASH3A
LINC00322
LINC02575
TSPEAR-AS2
SPATC1L
POTEH
CECR7
CECR3
GGT3P
POM121L15P
CCDC188
MIR1286
RIMBP3
POM121L4P
RIMBP3C
GGTLC2
POM121L1P
GSTT4
BCRP3
POM121L10P
KIAA1671
KIAA1671-AS1
IGLL3P
MIAT
MIATNB
SNORD125
HORMAD2
HORMAD2-AS1
LIF-AS1
LIF
KIAA1656
TCN2
PLA2G3
RNF185
MIR3928
MIR7109
YWHAH-AS1
AP1B1P1
MIR3909
MB
APOL6
RBFOX2
APOL4
CACNG2-DT
CACNG2
C1QTNF6
NOL12
GALR3
MIR4534
SNORA92
APOBEC3B
APOBEC3B-AS1
APOBEC3C
MGAT3-AS1
LOC112268293
L3MBTL2-AS1
ZC3H7B
LOC105373044
CYP2D7
SCUBE1-AS1
EFCAB6-AS1
SHISAL1
MOV10L1
LOC105373100
RPL23AP82
CAV3
CIDEC
EMC3-AS1
EMC3
FANCD2
CIDECP1
ATP2B2-IT2
LINC00606
SLC6A1-AS1
HRH1
VGLL4
TMEM40
LINC00620
TPRXL
GRIP2
LINC02011
MRPS25
ZNF385D
UBE2E1-AS1
OXSM
GADL1
MLH1
VILL
ENTPD3-AS1
CCK
GASK1A
KIF15
KIAA1143
MIR564
TMEM42
LZTFL1
LTF
MYL3
TMEM89
QARS1
AMT
TRAIP
RBM6
LSMEM2
GPR62
LINC00696
TLR9
ITIH4-AS1
WNT5A
SPATA12
ACOX2
C3orf14
PTPRG-AS1
FEZF2
ADAMTS9
SAMMSON
LINC00877
LOC101927296
PDZRN3-AS1
ROBO2
EPHA3
NSUN3
DHFR2
NFKBIZ
LINC01990
MORC1
ABHD10
GAP43
ARHGAP31
COX17
NR1I2
GTF2E1
RABL3
MYLK-AS2
LINC01471
KBTBD12
DNAJB8
ISY1-RAB43
EFCAB12
H1-8
LINC02014
PIK3R4
NPHP3-AS1
SRPRB
PCCB
SOX14
NME9
CEP70
RNF7
ZIC1
MBNL1-AS1
SLC33A1
PTX3
SHOX2
MLF1
MLF1-DT
MECOM
HTR3E-AS1
EEF1AKMT4
ALG3
BCL6
LOC122526776
IL1RAP
SNAR-I
DPPA2P3
LINC00887
XXYLT1-AS1
MUC4
ZDHHC19
LINC02012
ZNF876P
SLC26A1
LINC02171
LOC101928306
CYTL1
JAKMIP1
MRFAP1L1
LOC100129931
MIR4274
MIR95
LDB2
MED28
DHX15
TBC1D19
WDR19
LIAS
RPL9
RBM47
TMEM33
GABRA2
SPATA18
SCFD2
LNX1-AS2
PDGFRA
CXCL5
MRPL1
COPS4
ARHGAP24
HERC6
GRID2
MTTP
TRMT10A
CENPE
CXXC4
RPL34
RPL34-DT
ETNPPL
COL25A1-DT
COL25A1
ELOVL6
ANK2
ARSJ
TRAM1L1
METTL14
METTL14-DT
TRPC3
SLC25A31
PCDH18
ANAPC10
LSM6
GATB
ARFIP1
TIGD4
MAP9
FSTL5
FAM218A
TRIM61
TLL1
DDX60L
HAND2
LINC02427
FRG1-DT
MIR4456
LINC02982
MIR4277
CDH18
CDH6
LOC646652
PRLR
SPEF2
RPL37
C5orf34
ITGA1
MTREX
SLC38A9
DEPDC1B
DIMT1
RGS7BP
CWC27
CCNB1
BTF3
NSA2
GFM2
ZBED3-AS1
ZBED3
AP3B1
TENT2
CMYA5
ZFYVE16
RASGRF2-AS1
CKMT2
CKMT2-AS1
VCAN
TMEM161B-DT
TMEM161B
NR2F1-AS1
NR2F1
SPATA9
RIOK2
NUDT12
CDO1
LINC02148
RAPGEF6
MEIKIN
IL3
CSF2
HSPA4
VDAC1
CDKN2AIPNL
LINC02999
LOC101929719
EIF4EBP3
HARS2
LOC112267934
TAF7
PCDHGB4
PCDHGB5
PCDHGC3
PCDHGC5
LOC729080
SH3TC2-DT
MIR584
SH3TC2
IL17B
CARMN
SLC26A2
SLC6A7
NDST1
RBM22
ZNF300
CCDC69
UBLCP1
RARS1
C5orf58
KCNIP1
KCNIP1-AS1
LINC01944
NSG2
THOC3
CDHR2
ZNF346
DBN1
LOC105377752
GMCL2
ZNF454
LINC00847
SERPINB9P1
LOC101927759
HTATSF1P2
PRPF4B
GFOD1-AS1
NOL7
STMND1
CDKAL1
SOX4
HDGFL1
MRS2
HFE
ABT1
H4C9
ZNF184
H1-5
ZSCAN16
ZKSCAN8P1
TOB2P1
ZSCAN12
ZSCAN23
TRIM27
ZNF311
GABBR1
ZFP57
HLA-H
HCG4B
ZNRD1ASP
RNF39
TRIM15
MIR4640
GTF2H4
MUCL3
MICA-AS1
MICA
HCP5
MICB
TNF
LTB
LY6G5B
MPIG6B
LY6G6C
SAPCD1-AS1
CFB
C4B
TNXA
TNXB
MIR6721
RNF5
MIR6833
AGER
TSBP1-AS1
LOC100294145
RPS18
MIR6873
PFDN6
MIR6834
WDR46
GRM4
SNRPC
LOC285847
CDKN1A
PANDAR
CPNE5
CCDC167
SAYSD1
TDRG1
TREM2
UBR2
RPL7L1
RSPH9
LINC01512
SCIRT
MYMX
TMEM14A
RN7SK
GSTA4
CILK1
PRIM2
GUSBP4
KHDC1
COX7A2
HTR1E
CFAP206
MDN1
PRDM1
QRSL1
RTN4IP1
DDO
LAMA4
DSE
TPD52L1
CTAGE9
LINC01013
SLC18B1
RPS12
SNORD101
SNORD100
SGK1
WAKMAR2
VTA1
NMBR
PEX3
FUCA2
LTV1
AKAP12
SYNJ2-IT1
FNDC1-IT1
PNLDC1
DKFZp451B082
C6orf118
RPS6KA2-IT1
LOC441179
LINC01558
LINC01615
THBS2
LINC01624
LOC105375131
TNRC18
LINC02983
MIR589
THSD7A
SCIN
POLR1F
ITGB8-AS1
RAPGEF5
STEAP1B
RPS2P32
SKAP2
HOXA3
EVX1
INMT-MINDY4
AQP1
GHRHR
LINC00957
POM121L12
LANCL2
LOC650226
DKFZp434L192
MIR4283-1
LOC100287834
LOC100128885
LOC641746
ZNF138
ZNF92
CRCP
LINC03011
GTF2IRD1P1
TMEM248
POM121
MLXIPL
MIR4284
NCF1
GTF2IRD2
GTF2IRD2B
POM121C
PMS2P3
STEAP4
STEAP1
CFAP69
CLDN12
MTERF1
VPS50
COL1A2
PON3
SDHAF3
ATP5MF
AZGP1P1
GAL3ST4
PCOLCE
MOSPD3
TFR2
MUC3A
MIR4653
SH2B2
LOC100630923
LOC100289561
UPK3BL2
UPK3BL1
POLR2J2
DNAJC2
RINT1
DLD
CAV1
ASZ1
CFTR
ANKRD7
TSPAN12
RBM28
AKR1B15
CALD1
TMEM213
ZC3HAV1
UBN2
PARP12
RAB19
TMEM139
EPHA1
CTAGE15
CTAGE6
TCAF1
CTAGE4
CTAGE8
RNY3
LOC100134040
REPIN1
GIMAP7
AOC1
MIR671
WDR86-AS1
LINC01287
LOC101929998
HTR5A
BLACE
MIR595
LINC00689
GATA4
MICU3
SLC18A1
FGF17
PEBP4
LOC100507156
MIR6841
ADRA1A
SCARA5
UBXN8
NRG1-IT3
RNF5P1
NKX6-3
MIR486-2
MIR486-1
CLXN
ST18
XKR4-AS1
LINC01606
CYP7B1
TRPA1
LOC392232
IMPA1
CA3
REXO1L2P
PSKH2
LINC01030
RUNX1T1
GEM
INTS8
TSPYL5
RPL30
NIPAL2
BAALC-AS2
DCAF13
SLC25A32
ENY2
MED30
HAS2-AS1
HAS2
FAM83A
MYC
CASC11
SLA
COL22A1
LOC122455339
MIR1302-7
MIR4472-1
LINC02904
LINC02878
FAM138C
DMRT3
DMRT2
SAXO1
RPS6
DMRTA1
DDX58
MIR12117
AQP7
MIR6851
NOL6
SUGT1P1
C9orf24
CNTFR-AS1
ATP8B5P
FAM166B
SIT1
CA9
SPAAR
FGF7P3
LINC01410
LERFS
BMS1P14
LOC286297
LOC100996643
FRG1JP
FRG1HP
CBWD6
CBWD5
CBWD3
NTRK2
LOC392364
DIRAS2
FGD3
PCAT7
LOC100507346
PTCH1
ERCC6L2-AS1
PLPPR1
ZNF189
MRPL50
PPP3R2
ABCA1
ACTL7B
TNC
CUTALP
PSMD5
CNTRL
DAB2IP
MRRF
RBM18
GPR21
CFAP157
SLC25A25-AS1
LCN2
MIR199B
MIR3154
ENDOG
PHYHD1
LINC02975
LINC01503
TOR1A
QRFP
PLPP7
SNORD62B
CEL
CELP
ADAMTS13
WDR5
COL5A1-AS1
LOC401557
MIR4292
FAM9A
FAM9B
TBL1X
MAGEB17
MBTPS2
SUPT20HL2
ARX
DMD
MID1IP1
LOC101927476
EFHC2
KRBOX4
INE1
MIR4769
CFP
ZNF81
SPACA5
ZNF182
ZNF630
SLC38A5
RBM3
SLC35A2
SYP-AS1
GAGE13
GAGE12I
GAGE12C
GAGE12D
GAGE12F
GAGE12H
GSPT2
XAGE3
FAM120C
APEX2
FAM104B
MAGEH1
MIR4536-1
USP51
KLF8
LINC01278
EFNB1
RAB41
LOC105373244
DLG3-AS1
IL2RG
GJB1
ZMYM3
NONO
TAF1
PIN4
ERCC6L
CHIC1
MAP2K4P1
NEXMIF
UPRT
PBDC1
SH3BGRL
HMGN5
HDX
UBE2DNL
CHM
DIAPH2
XKRX
TRMT2B
GLA
ARMCX3
TCP11X2
TMSB15A
RAB40AL
TCEAL9
TMSB15B
TEX13A
TBC1D8B
RBM41
MID2
KCNE5
RTL4
TRPC5
DANT1
NDUFA1
RNF113A
RHOXF1P1
ZBTB33
GLUD2
XIAP
TEX13D
XPNPEP2
ZNF280C
[truncated: 31 more rows]

## Sheet: Adipocyte_DAVID
Category	Term	Count	%	PValue	Genes	List Total	Pop Hits	Pop Total	Fold Enrichment	Bonferroni	Benjamini	FDR
UNIGENE_EST_QUARTILE	normal_disease_3rd	590	29.4558	0.0014576	CHIC1, SPAAR, PGAP3, RPL34, GMFG, NEXMIF, MRGPRG, RNF112, CYP2D7, LIPJ, CREB3L3, FDXR, RPL37, UBASH3A, LOC441179, SAMD13, C2ORF81, LINC00654, KRTDAP, RBFOX2, RPL21, SOX14, CEL, CACNA2D4, PDYN, ZFYVE16, PRKAR1A, CTAGE4, TFR2, RFX4, MAP1A, MYL3, CTAGE9, PIH1D2, LINC00887, HPD, ALG10B, LINC00642, ASTN1, TSPYL5, SHOX2, ACTL7B, GATA4, A1BG, MAGEA9B, CFP, TEX29, C12ORF57, GHRHR, PPP3R2, ADAMTS13, FLRT3…	1262	7605	17825	1.09578	0.104934	0.110778	0.10932
HPA_RNA_TISSUE	intestine	94	4.69296	0.00396826	FCGBP, ACY3, SH2D7, MOGAT2, SCT, TREH, RXFP4, KRT20, SLC2A5, HAPLN4, TMEM92, C1ORF210, CREB3L3, ANPEP, FFAR4, CCR7, LGALS9, SAMD13, CD177, PTGDR, RNF43, LEFTY1, NKX6-3, C11ORF86, GPR35, SEMA6D, ITGA1, MYO7B, TACR2, MUC3A, LGALS9C, CEACAM1, OMP, CEACAM7, CDC42EP5, HAND2, TMEM139, CDHR2, TFF3, TRIM15, LTB, SMPDL3B, CHST5, CFTR, HOXB5, BIRC3, SLC26A2, LTK, TMEM238L, NR1I2, MTTP, HOXD12, FUT2, IL2RG,…	823	946	10914	1.31771	0.129916	0.142857	0.142857
HPA_RNA_TISSUE	choroid plexus	47	2.34648	0.015448	CLXN, C1QA, SPAG17, IQCA1, DRC7, STEAP1B, SPEF1, WFIKKN2, STMND1, TREM2, PKD1L2, RSPH9, PBXIP1, EFCAB12, CFAP300, ENO4, AQP1, TOGARAM2, FAM180B, CCDC30, CFAP69, ALX4, GET1, CFAP43, GAS2L2, DYNLT5, DYNC2H1, PSENEN, CBX5, CFAP70, LRRIQ1, SLC16A11, DMRT3, SLC39A12, CFAP157, VWA5B1, PRLR, ARMC3, MORN2, NME9, CFAP57, DYNLRB2, C6ORF118, EFHC2, RAB17, CDO1, SLC22A8	823	443	10914	1.40695	0.4201	0.278064	0.278064
UNIGENE_EST_QUARTILE	embryo_development_3rd	599	29.9051	0.010544	CHIC1, RPL34, GMFG, NEXMIF, RNF112, CYP2D7, LIPJ, SOX15, MTERF1, RPL37, LOC441179, C2ORF81, LINC00654, KRTDAP, ACOT8, RBFOX2, RPL21, CEL, PDYN, KNSTRN, CTAGE4, TFR2, RFX4, ZSCAN22, MYL3, TMEM126A, RABL3, CTAGE9, LINC00887, PPIEL, HPD, ALG10B, ASTN1, TSPYL5, ZNF155, PIF1, SHOX2, ACTL7B, GATA4, A1BG, ZC3HAV1, TEX29, C12ORF57, XKRX, PPP3R2, ADAMTS13, FLRT3, ALX4, S100A12, PLAC1, ZSCAN12, ALX1, LINC0…	1262	7894	17825	1.07177	0.553181	0.400673	0.395401
UNIGENE_EST_QUARTILE	trachea_normal_3rd	259	12.9306	0.0439484	HCP5, CHIC1, PGAP3, NEXMIF, GORAB, FRG1HP, DDX60L, TMEM92, AQP1, TRIM29, NIPAL2, FDXR, ARFIP2, EPC1, ARFIP1, PRSS8, HERC6, COG3, ARMC9, CACNA2D4, PLPP7, ZFYVE16, LOC727751, CTAGE4, PRKAR1A, CTAGE9, PIH1D2, UPRT, WDPCP, VSIG10L2, SPATA18, PPIEL, EPHA1, CFTR, CFB, EPHA3, CES1, ASTN1, TMEM161B, DHX8, IGSF1, PIK3R4, FRG1JP, ZC3HAV1, PCDH18, GMCL2, GHRHR, HSPH1, NUP88, ZNF268, BANP, STAT5A, ZRANB2, CF…	1262	3317	17825	1.10287	0.967147	0.55668	0.549355
UNIGENE_EST_QUARTILE	liver_normal_3rd	247	12.3315	0.040402	CDA, RPL5, NUP107, TP53RK, FCF1, AQP7, FRG1HP, RPL9, TMEM92, MAGEA9, C4B, PSMD7, CREB3L3, PSMD5, ANPEP, CCN5, RPL37, UBASH3A, ACAD10, LOC441179, RPS12, LOC613038, RPL21, RPL23, MYO7B, KNL1, VWA5B1, PSG8, IFI27, PSG4, CTAGE4, TFR2, ZSCAN22, MYL3, CTAGE9, SERPING1, VDAC1, EPHA1, HOXB7, HPD, CFTR, CFB, BLZF1, CES1, MT1E, TMEM161B, IGSF1, MTTP, GATA4, A1BG, MAGEA9B, ANAPC10, PRPSAP1, C3, ADAMTS13, CM…	1262	3144	17825	1.10965	0.95647	0.55668	0.549355
UNIGENE_EST_QUARTILE	esophagus_normal_3rd	212	10.5841	0.0343767	LTV1, HCP5, IL1RN, CHIC1, GORAB, FCF1, AQP1, MAGEA9, HENMT1, TRIM29, SNRPD1, SOX15, NIPAL2, FDXR, PRSS8, LGALS9, HLA-H, ALG8, ACOT8, SP110, COG3, ALG3, CEL, HCG4B, DEPDC1B, IFI27, PRKAR1A, SERPING1, VDAC1, TRIM15, WDPCP, TRIB3, SPATA18, EPHA1, CES1, GRB7, DHX8, MTTP, PIK3R4, FRG1JP, MAGEA9B, GSPT2, KLK7, OSGEP, GMCL2, PRPSAP1, HSPH1, CEP70, ZSCAN12, TRPM7, TNRC18, NUP88, S100A14, LTA4H, H4C9, STK…	1262	2658	17825	1.12655	0.929953	0.55668	0.549355
UNIGENE_EST_QUARTILE	breast (mammary gland) cancer_disease_3rd	315	15.7264	0.0228122	RPL30, CHIC1, FRG1HP, PKD2L1, H2AC18, C4B, RNF112, IL4I1, SNRPD1, MAGEA1, CCN5, CHAC2, PRSS8, UBASH3A, THSD7A, SAMD13, DYNC2H1, ALG8, ACOT7, ENDOG, RPL21, COG3, ARMC9, KNSTRN, EID1, ZFYVE16, IFI27, TFR2, ZSCAN22, RABL3, PIH1D2, VDAC1, TARS2, WDPCP, SPATA18, EPHA1, CFB, MT1E, TSPYL5, GRB7, PIK3R4, ZC3HAV1, C3, TRPM1, CYP27B1, CMYA5, HOXC5, PLAC1, TRPM7, NUP88, ALX1, S100A14, SERPINB9P1, BTF3, HTAT…	1262	4025	17825	1.10539	0.826886	0.55668	0.549355
GNF_U133A_QUARTILE	Amygdala_3rd	229	11.4329	0.00765512	HCP5, RPL5, SPON1, IL1RN, AQP6, FCF1, AQP7, ANTXR1, TMEM92, TIAL1, TP53AIP1, PSMD5, AKT2, CHEK1, FDXR, ARFIP1, MTERF1, THSD7A, ACAD10, PTGDR, MBNL2, RBFOX2, ARMC9, CEL, KNL1, PDYN, PSG8, PSG4, CTAGE4, TFR2, CTAGE9, SNORA21, HOXB7, CFTR, CFB, BLZF1, HOXB5, SKAP2, MT1E, ASTN1, ZNF155, POM121, GIPR, IGSF1, SHOX2, PIK3R4, AGAP2, GATA4, ZC3HAV1, C3, INE1, NHLH1, ZSCAN12, NAALAD2, ZNF268, HAO2, MAP9, A…	958	2818	13625	1.15575	0.450857	0.597099	0.597099
UNIGENE_EST_QUARTILE	mammary gland_normal_3rd	342	17.0744	0.0630543	CHIC1, AQP7, PKD2L1, ANTXR1, H2AC18, C4B, TIAL1, RNF112, CREB3L3, SNRPD1, ANPEP, MAGEA1, CCN5, EPC1, CHAC2, MTERF1, PRSS8, UBASH3A, THSD7A, HERC6, LINC00654, DYNC2H1, ALG8, RPL21, SP110, COG3, ARMC9, PSG9, ZFYVE16, CTAGE4, TFR2, ZSCAN22, SPATA13, CTAGE9, SERPING1, TARS2, WDPCP, SPATA18, HPD, CFB, CES1, MT1E, TSPYL5, ZNF155, GRB7, CSTF3, SHOX2, PIK3R4, A1BG, ZC3HAV1, KLK7, ANAPC10, PRPSAP1, C3, TR…	1262	4489	17825	1.07609	0.992916	0.599016	0.591135
UNIGENE_EST_QUARTILE	connective tissue_normal_3rd	244	12.1817	0.0620837	CDA, PGAP3, GORAB, DDX60L, ANTXR1, RPL9, AQP1, IL4I1, ANPEP, MAGEA1, CCN5, MTERF1, UBASH3A, THSD7A, LGALS9, C2ORF81, LINC00654, SP110, PRKAR1A, MAP1A, SPATA13, SERPING1, UPRT, VSIG10L2, CFB, EPHA3, SKAP2, MT1E, TSPYL5, ARX, A1BG, CFP, PCDH18, ADAMTS13, PPP3R2, SCFD2, ARSJ, HOXC5, ALX4, MOV10L1, LTA4H, STAT5A, RPL23AP7, H4C9, HARS2, FAM111B, EHD3, BPIFB1, COL1A2, SSPN, NDUFAF1, INTS8, VSX1, ARHGAP…	1262	3140	17825	1.09757	0.992336	0.599016	0.591135
UNIGENE_EST_QUARTILE	esophageal tumor_disease_3rd	216	10.7838	0.0722141	LTV1, HCP5, IL1RN, CHIC1, GORAB, MAGEA9, HENMT1, TRIM29, SNRPD1, MYC, SOX15, NIPAL2, FDXR, PRSS8, RPL37, LGALS9, HLA-H, ALG8, ACOT8, SP110, COG3, ALG3, CEL, HCG4B, DEPDC1B, IFI27, PRKAR1A, VDAC1, TRIM15, WDPCP, TRIB3, SPATA18, EPHA1, CES1, GRB7, DHX8, MTTP, PIK3R4, TRMT2B, FRG1JP, MAGEA9B, GSPT2, KLK7, OSGEP, GMCL2, PRPSAP1, HSPH1, CEP70, ZSCAN12, TRPM7, TNRC18, NUP88, S100A14, LTA4H, H4C9, STK11…	1262	2775	17825	1.09941	0.996642	0.609808	0.601784
HPA_RNA_TISSUE	esophagus	42	2.09685	0.0694721	GRB7, CDA, ECM1, IL1RN, FAM25A, NDUFA4L2, PLA2G3, UPK3BL1, UPK3BL2, PRDM1, KLK7, TP53AIP1, TRIM29, SOX15, ZNF724, RNF39, S100A14, MPZL3, MUC4, LGALS7, FAM83A, GGT6, KRT3, MYEOV, KRT13, IL18, KRT78, TMEM40, ARHGAP27, CNFN, TMPRSS13, LGALS9C, SERPINB5, ALDH3A1, C1ORF116, EHD3, ELF3, KRT15, PAX9, RHCG, EPHA1, CARD14	823	431	10914	1.29228	0.919549	0.623705	0.623705
HPA_RNA_TISSUE	vagina	17	0.848727	0.0866257	KRTDAP, EDN3, FAM25A, KRT13, PLA2G3, TMEM40, EVX1, CNFN, TP53AIP1, TRIM29, KRT15, RNF39, S100A14, RHCG, MUC4, CARD14, FAM83A	823	147	10914	1.53361	0.958052	0.623705	0.623705
HPA_RNA_TISSUE	adipose tissue	25	1.24813	0.066896	ABCD2, STEAP4, SPAAR, SHOX2, AQP7, PKD1L2, ADRA1A, DEPP1, PALMD, MYC, HAS1, CCN5, FFAR4, HAS2, ADAMTS9, STAT5A, AOC3, MYEOV, PLA2G2A, AVPR2, EN1, CIDEC, MYMX, PTX3, ACKR1	823	231	10914	1.4352	0.911376	0.623705	0.623705
UNIGENE_EST_QUARTILE	prostate_normal_3rd	347	17.324	0.0889197	CDA, RPL30, CHIC1, PGAP3, RPL34, GMFG, FCF1, AQP7, FRG1HP, ANTXR1, RPL9, H2AC18, TPRXL, RNF112, CYP2D7, HENMT1, BCRP3, TRIM29, MYC, ANPEP, NIPAL2, PSMD3, CCN5, EPC1, RPL37, UBASH3A, THSD7A, LGALS7, SAMD13, C2ORF81, RPS12, HERC6, DYNC2H1, ALG8, ENDOG, RBFOX2, RPL21, RPL23, OXSM, COG4, COG3, MYO7B, TXLNGY, PABIR3, PLPP7, DEPDC1B, CTAGE4, RFX4, MYL3, RABL3, CTAGE9, PIH1D2, LINC00887, TARS2, SPATA18,…	1262	4598	17825	1.06593	0.999156	0.64166	0.633217
UNIGENE_EST_QUARTILE	brain_normal_3rd	449	22.4164	0.0928718	CHIC1, SPAAR, NEXMIF, YWHAH-AS1, RNF112, CREB3L3, SOX15, PRR20E, C2ORF81, LINC00654, LOC613038, ACOT8, SOX14, PDYN, ZFYVE16, PRKAR1A, RFX4, ZSCAN22, MAP1A, LINC00887, HPD, LINC00642, ASTN1, TSPYL5, ZNF155, SHOX2, ACTL7B, AGAP2, A1BG, ANAPC10, TEX29, C12ORF57, PPP3R2, HSPH1, ADAMTS13, FLRT3, ALX4, MOV10L1, ALX1, LINC02731, ZNF268, GPR17, HTATSF1P2, MAPK8IP1P2, RPL23AP7, GLYATL1, CFAP70, NR2F1, L1C…	1262	6024	17825	1.05277	0.999394	0.64166	0.633217
GNF_U133A_QUARTILE	lymphomaburkittsRaji_3rd	693	34.5981	0.0189302	HCP5, CDA, RPL5, RPL30, ZNF175, NUP107, SCT, RPL34, GMFG, YWHAH-AS1, RPL9, TMEM92, H2AC18, NDST1, PSMD5, AKT2, MYC, SOX15, HOXA3, FDXR, MTERF1, RPL37, UBASH3A, PRSS8, ACOT7, MBNL2, RBFOX2, RPL21, RPL23, ARMC9, SOX14, CEL, ZNF14, CTAGE4, TFR2, MAP1A, MYL3, RFX5, RABL3, CTAGE9, TARS2, PPIEL, SNORA21, HOXB7, HPD, CFB, HOXB5, SKAP2, ZNF155, POM121, ANAPC15, COL13A1, SHOX2, ACTL7B, AGAP2, MRPL16, PLA2…	958	9441	13625	1.04397	0.774788	0.738278	0.738278
GNF_U133A_QUARTILE	Cerebellum_3rd	706	35.2471	0.0293674	CDA, RPL5, ZNF175, NUP107, PGAP3, SCT, YWHAH-AS1, H2AC18, NDST1, ISLR, PSMD5, AKT2, MYC, SOX15, HOXA3, FDXR, MTERF1, UBASH3A, PRSS8, ACOT7, MBNL2, RBFOX2, RPL21, RPL23, ARMC9, SOX14, CEL, PDYN, ZNF14, EID1, ZFYVE16, CTAGE4, TFR2, MAP1A, MYL3, RFX5, RABL3, CTAGE9, PPIEL, SNORA21, HOXB7, HPD, CFB, HOXB5, SKAP2, ZNF155, POM121, ANAPC15, COL13A1, SHOX2, ACTL7B, AGAP2, PLA2G3, GATA4, COPS7A, MAGEA9B, …	958	9668	13625	1.03858	0.902213	0.763552	0.763552
GNF_U133A_QUARTILE	Trigeminal Ganglion_3rd	118	5.89116	0.0404412	FCGBP, PLVAP, SPON1, IL1RN, PGAP3, HFE, TNC, RORC, DCAF8, RGS5, TRIM29, SOX15, NIPAL2, CCN5, ARFIP2, PRSS8, SOX4, GEM, GRIP2, ARMCX3, PSG8, ALDH3A1, C1ORF116, PSG4, PRKAR1A, CTAGE4, MAP1A, CTAGE9, SERPING1, NUPR1, STEAP1, STAM2, CFB, CES1, SLC26A2, SLC1A5, FUT2, LTBP1, PRPSAP1, CNN1, CALD1, NUP88, CYTL1, S100A14, CAV1, KIR2DS4, SLC33A1, CIDEC, MLXIPL, DIAPH2, COL1A2, BCL6, AKR1B15, LCN2, FAM30A, …	958	1431	13625	1.17277	0.960044	0.788602	0.788602
GNF_U133A_QUARTILE	Lung_3rd	222	11.0834	0.074428	CDA, IFITM1, IL1RN, IFITM2, PGAP3, AQP7, TRIM29, SOX15, ANPEP, FDXR, ARFIP2, ACOT8, ENDOG, RPL23, MYO7B, ALG3, GPR37L1, KNL1, CARHSP1, IFI27, TFR2, NINJ2, MAP1A, SERPING1, VDAC1, TRIM15, TARS2, TRIB3, EPHA1, HOXB7, HPD, CFTR, CFB, EPHA3, CES1, HOXB5, MT1E, GRB7, ANAPC15, COL13A1, SHOX2, MTTP, GATA4, CFP, PRPSAP1, C3, TRPM1, CD79B, ADAMTS13, ARSJ, HOXC5, NUP88, HAO2, H4C9, GDF2, NR0B2, BST2, GLUD2…	958	2888	13625	1.09327	0.997601	0.802122	0.802122
GNF_U133A_QUARTILE	Smooth Muscle_3rd	293	14.6281	0.0585311	RPL5, ZNF175, IL1RN, FCF1, ICAM4, ANTXR1, TMEM92, TP53AIP1, PSMD5, TRIM29, AKT2, NIPAL2, CHEK1, MTERF1, THSD7A, PTGDR, RBFOX2, MYO7B, ARMC9, FLT3LG, HNF1B, CEL, KNL1, PDYN, PSG9, STX1B, PSG8, PSG4, CTAGE4, TFR2, MYL3, CTAGE9, TARS2, SNORA21, CFTR, BLZF1, EPHA3, CES1, SKAP2, ZNF155, COL13A1, GIPR, SHOX2, MTTP, PIK3R4, AGAP2, PLA2G3, ANAPC10, TRPM1, CD79B, INE1, ARSJ, CFAP69, ZSCAN12, S100A12, NUP8…	958	3851	13625	1.08209	0.990945	0.802122	0.802122
GNF_U133A_QUARTILE	fetalThyroid_3rd	72	3.59461	0.0946078	FCGBP, SCARB1, HFE, ZNF43, LDB2, TMEM92, SERPINA5, GGTLC2, TP53AIP1, ISLR, HMGN5, PSMD5, ZC3H7B, TRIM29, SOX15, GDAP1L1, ZIC1, SCARF1, ADAMTS9, CD177, HERC6, RBMY1F, AZGP1P1, RBMY1J, ARMC9, ANK2, AP3B1, MUC3A, MID2, MED28, PSG9, GAP43, CTAGE4, HAND2, CTAGE9, CFTR, BLZF1, SLC26A2, GAGE12F, GAGE12C, GAGE12D, LAMA4, LTBP1, HRH1, CALD1, CASKIN2, NHLH1, PPP1R8, S100A12, NAALAD2, SNCG, DMD, CCT8, SLC15…	958	865	13625	1.18382	0.99957	0.802122	0.802122
GNF_U133A_QUARTILE	ADIPOCYTE_3rd	728	36.3455	0.0974354	HCP5, CDA, RPL5, ZNF175, NUP107, SCT, RPL34, GMFG, DCAF8, YWHAH-AS1, RPL9, H2AC18, NDST1, PSMD7, PSMD5, AKT2, MYC, PSMD3, HOXA3, FDXR, MTERF1, RPL37, UBASH3A, PRSS8, SAP30BP, ACOT8, ACOT7, RBFOX2, RPL21, RPL23, SOX14, ZNF14, EID1, PRKAR1A, CTAGE4, TFR2, MAP1A, MYL3, RFX5, RABL3, CTAGE9, TARS2, PPIEL, SNORA21, HOXB7, HPD, HOXB5, TSPYL5, SKAP2, POM121, ANAPC15, COL13A1, SHOX2, ACTL7B, AGAP2, MRPL16…	958	10103	13625	1.02483	0.999663	0.802122	0.802122
GNF_U133A_QUARTILE	Liver_3rd	103	5.14229	0.0637432	PLVAP, TACO1, TNC, AQP6, RORC, DCAF8, AQP7, ABHD10, PSMD5, FCGRT, ANPEP, PRSS8, ACAD10, RNF43, ACOT7, ENDOG, HNF1B, ANK2, CEL, GEM, GRIP2, PSG8, ALDH3A1, PSG4, HOXB7, HPD, MT1E, IQCA1, PROZ, KIR2DL1, CYP27B1, RNF5P1, CASKIN2, CYTL1, S100A14, HAO2, GOT1, KIR2DS4, CYP4F11, ACSF2, VIL1, EHD3, GLUD2, GJB1, PROC, TCN2, PAH, RNF186, SLC22A8, NES, TREH, HSPB7, ARHGEF10L, TSPAN12, SLC2A5, ADRA1A, SERPINA…	958	1257	13625	1.16539	0.994128	0.802122	0.802122
CGAP_SAGE_QUARTILE	147:brain_ependymoma_3rd	122	6.09086	0.0264544	DPAGT1, CLXN, CCDC167, FCGBP, RPL5, MRE11, TP53RK, TACO1, SLA, CFAP300, ANTXR1, AQP1, NDST1, SOX15, PEBP4, ARFIP1, CHCHD1, DYNC2H1, PDGFRA, RBFOX2, RPS6, KNCN, LZTFL1, PABIR3, EID1, DPM3, H4C14, RPL7L1, SERPING1, NUPR1, SPATA18, ZNF311, SKAP2, INO80B, FBLIM1, CSTF3, IGSF1, COX17, MTTP, DTX3, AGER, OSGEP, ANAPC10, GMCL2, C3, HSPH1, TMEM248, RNF5P1, DHRS7B, PMVK, CCDC30, ALX4, ALX1, COX14, BANP, H4…	1129	1462	16134	1.19251	0.999909	0.999999	0.999999
CGAP_SAGE_QUARTILE	91:peritoneum_normal_3rd	115	5.74139	0.0138636	CCDC144CP, ZNF331, MYLK2, MTFMT, STEAP4, TXNL4B, ITPRIP, CD81, RORC, SLA, CWC27, AQP1, RGS5, HENMT1, FCGRT, MYC, CD177, PDGFRA, COG4, FLT3LG, PCOLCE, GPR37L1, DGKZ, RINT1, TYROBP, SLFN11, AIPL1, PPIEL, CES1, SKAP2, LINC01973, RTN2, SLC26A2, STEAP1B, PXN, AGAP2, PLA2G3, CFP, MTLN, C3, CNN1, HSPH1, CALD1, ARSJ, CMYA5, CACNA1S, SLC15A3, APOBEC3C, GPR17, GGT6, TOR1A, CAV1, ARHGAP27, COL1A2, BCL6, SSP…	1129	1337	16134	1.22918	0.992127	0.999999	0.999999
CGAP_SAGE_QUARTILE	644:mammary gland_ER+, PR+, HER2-, grade II_3rd	70	3.49476	0.0886711	ZNF331, CDKN1A, PLVAP, PIGT, ITPRIP, PCDHGB5, PCDHGB4, ARHGEF10L, ANTXR1, AQP1, GAS6-AS1, NFKBIZ, DSE, MDP1, LGALS7, RPS9, EDN3, SSR2, PCOLCE, MID2, RNF40, SFPQ, ELF3, HAND2, COL6A3, CFB, SKAP2, PPP1R15B, TMEM161B, NFIX, TNXB, TNXA, C1R, TUFT1, PBXIP1, THBS2, DEPP1, C3, CNN1, HSPH1, IFI16, OLFML3, DGLUCY, PMVK, TNRC18, DMD, BRD4, TCEAL9, LGALS7B, LAMB3, PCDHGC5, HSPA4, PBDC1, PCDHGC3, DAB2IP, NR2…	1129	840	16134	1.19088	1	0.999999	0.999999
CGAP_SAGE_QUARTILE	129:pancreas_primary adenocarcinoma_3rd	131	6.54019	0.0253826	CCDC144CP, PLVAP, ERCC6L, IFITM1, MTFMT, ITPRIP, PGAP3, RORC, DDX60L, SAYSD1, IL1RAP, AQP1, NDST1, PSMD7, TRIM29, FCGRT, ANPEP, ARFIP2, LGALS7, HERC6, COG4, ALG3, PCOLCE, GPR37L1, C1ORF116, SLFN11, IFI27, CTAGE4, ZSCAN22, CTAGE9, NUPR1, PPIEL, ZNF311, SKAP2, LINC01973, RTN2, GRB7, ZC3HAV1, CALD1, SLC38A5, FAM83A, GGT6, ANKRD40CL, STARD10, L1CAM, BST2, IL3, NPLOC4, LSM6, COL1A2, TCN2, STT3A, SSPN,…	1129	1579	16134	1.1856	0.999867	0.999999	0.999999
CGAP_SAGE_QUARTILE	90:prostate_carcinoma_3rd	91	4.54319	0.0555121	PCSK2, CCDC144CP, CCDC167, DIRAS3, ZNF132, RBM28, ACADVL, MRPS15, MTFMT, CD81, GPR21, CPNE6, SIRPB2, DDX60L, ARHGEF10L, CWC27, C1ORF210, CHCHD5, CSTF3-DT, HENMT1, CYP2D7, FDXR, HIF1AN, HERC6, METTL17, BCKDHA, ABT1, PDGFRA, ZNF880, ACOT8, RFC3, AREL1, RBFOX2, DIMT1, GPR35, AVPR2, THOC3, GPR37L1, RNF40, MED28, TYROBP, TMSB15A, TFR2, TMSB15B, SNURF, TFF3, TRIM58, TARS2, EFHC2, LDAH, STEAP1, EPHA1, Z…	1129	1091	16134	1.19197	1	0.999999	0.999999
CGAP_SAGE_QUARTILE	355:brain_Glioblastoma_3rd	108	5.39191	0.0292781	ZNF331, FCGBP, TP53RK, GMFG, TNC, RXFP4, SLA, LOC646652, RNF112, PSMD7, FCGRT, RPL21, CD300A, SP110, UBE4A, C1ORF87, PCOLCE, PABIR3, EID1, DPM3, TYROBP, DOK4, CTAGE4, CTAGE9, STEAP1, LINC01973, COX17, PRPSAP1, C3, HRH1, SYCE1, CALD1, PMVK, COX14, LTA4H, SLC38A5, ATP5MF, NIBAN3, TOR1A, TVP23A, ARHGAP27, PARP12, BST2, LSM6, COL1A2, BPIFB3, NMT1, DCHS1, SAE1, FERMT3, GPR21, SNAP23, TREM2, WDR46, RBM…	1129	1282	16134	1.20388	0.999967	0.999999	0.999999
CGAP_EST_QUARTILE	16049:uteru_uncharacterized histology_3rd	18	0.898652	0.077662	BCKDHA, ITPRIP, DHX8, TUFT1, ARMC9, PDE4DIP, IL2RG, RPL9, SFPQ, NPLOC4, NARS1, NMT1, CCSER2, VDAC1, SAE1, GBP2, CFB, METTL17	1162	165	16356	1.53553	1	1	1
HPA_NORMAL_TISSUE_CELLTYPE	skin 1; cells in corneal layer	12	0.599101	0.0754514	IL4I1, ACADVL, ECM1, TACO1, KRT15, TMEM119, CCR7, LDB2, S100A14, CNFN, KLK7, SERPINB5	807	93	11043	1.76568	1	1	1
CGAP_EST_QUARTILE	21492:uncharacterized tissue_neoplasia_3rd	7	0.349476	0.0968145	DIAPH2, ZFYVE16, HM13, LCN2, S100A12, MTREX, RASGRP4	1162	45	16356	2.18956	1	1	1
CGAP_EST_QUARTILE	1118:brain_normal_3rd	7	0.349476	0.0743387	RPL5, EHD3, RPL23, LDAH, STAM2, FTH1P3, BEST1	1162	42	16356	2.34596	1	1	1
CGAP_EST_QUARTILE	21777:placenta_normal_3rd	8	0.399401	0.0732391	DIAPH2, CYP11A1, KIAA1143, AP3B1, THSD7A, PRLR, STAM2, HERC6	1162	52	16356	2.1655	1	1	1
CGAP_EST_QUARTILE	19563:mammary gland_normal_3rd	6	0.299551	0.0728986	ZNF671, COL1A2, PRKAR1A, ARFIP2, PRSS8, FLI1	1162	32	16356	2.6392	1	1	1
CGAP_EST_QUARTILE	20954:colon_neoplasia_3rd	10	0.499251	0.0726514	MOV10, RAB6C, STIL, RAB6D, CBX5, NMT1, LTA4H, ACAD10, PABIR3, SKAP2	1162	73	16356	1.92818	1	1	1
CGAP_EST_QUARTILE	786:uncharacterized tissue_uncharacterized histology_3rd	6	0.299551	0.0651426	CKMT2, PCDHGB5, PCDHGB4, PCDHGC5, PCDHGC3, HARS2	1162	31	16356	2.72434	1	1	1
CGAP_EST_QUARTILE	39007:uncharacterized tissue_neoplasia_3rd	44	2.1967	0.070849	NKAPD1, DIRAS3, SP100, ENY2, CHIC1, CRCP, AHCY, DHX8, MTIF2, FRG1JP, ING4, RGS5, IFI16, OLFML3, PPP1R8, NAALAD2, NLRP3, TK2, GET1, UGGT2, MARK3, METTL17, SLC35A2, MDH1, DIMT1, GPR35, PTCH1, ELAC2, DHPS, ERAL1, LZTFL1, COPS4, IMMP1L, GAP43, NSG2, GSTA4, SERBP1, PCCB, NMT1, VPS45, CDO1, COPS8, ASB3, IRF9	1162	482	16356	1.28492	1	1	1
UP_TISSUE	Insulinoma	6	0.299551	0.0658691	PCSK2, ZNF155, ZNF132, ZNF138, ZNF136, ZNF134	1317	31	18482	2.71614	1	1	1
CGAP_EST_QUARTILE	11376:uncharacterized tissue_neoplasia_3rd	9	0.449326	0.0708287	HSPH1, CALD1, SGIP1, DIRAS2, COL6A3, POLR1F, THBS2, SAE1, LINC01278	1162	62	16356	2.04325	1	1	1
CGAP_EST_QUARTILE	23412:colon_neoplasia_3rd	9	0.449326	0.0708287	FCGBP, ELF3, MYC, CASKIN2, TNC, LCN2, EPC1, S100A14, NES	1162	62	16356	2.04325	1	1	1
CGAP_EST_QUARTILE	38081:kidney_normal_3rd	29	1.44783	0.0708059	DPAGT1, RBM28, RPL5, AHCY, RDM1, PSMD7, NARS1, ZNF649, DHRS7B, CHEK1, RPS3, RIOK2, CCT8, NOP58, RPS7, NONO, ZBTB33, MLH1, TNFRSF1A, COPS4, ETAA1, EBNA1BP2, SLFN11, HAX1, FANCD2, ZNF317, DLD, MBTPS2, BLZF1	1162	295	16356	1.38372	1	1	1
HPA_NORMAL_TISSUE_CELLTYPE	skin 2; cells in corneal layer	16	0.798802	0.0780381	ACADVL, ECM1, COX17, KRT13, CNFN, KLK7, SERPINB5, IL4I1, TUBA1A, KRT15, CEP70, NFKBIZ, TMEM119, CCR7, S100A14, RHCG	807	138	11043	1.58655	1	1	1
CGAP_EST_QUARTILE	21104:genitourinary_neoplasia_3rd	5	0.249626	0.0663269	DIAPH2, POM121L10P, POM121L4P, BCRP3, IWS1	1162	22	16356	3.19903	1	1	1
CGAP_EST_QUARTILE	40130:uncharacterized tissue_uncharacterized histology_3rd	8	0.399401	0.0673003	SH3BGRL, C1R, SERPING1, A1BG, DHRS3, CFB, AGT, CES1	1162	51	16356	2.20796	1	1	1
CGAP_EST_QUARTILE	19105:head and neck_neoplasia_3rd	15	0.748877	0.066458	SPAG17, CD81, PXN, MX1, ALG3, C2ORF49, PDZK1IP1, FTH1P3, BEST1, VMP1, ETAA1, MXI1, CCSER2, LGALS9, HERC6	1162	127	16356	1.66249	1	1	1
CGAP_EST_QUARTILE	19258:cerebrum_normal_3rd	4	0.1997	0.0721019	DYNC2H1, ATP5F1B, ZNF302, LDAH	1162	14	16356	4.02164	1	1	1
HPA_NORMAL_TISSUE_CELLTYPE	nasopharynx; basal cells	57	2.84573	0.0783867	DPAGT1, SETD4, RBM28, ACADVL, MRPS15, CRCP, GEMIN2, CWC27, SERPINA5, RBM3, CDH6, NARS1, ARFIP2, HIF1AN, RPS12, RBM6, DYNC2H1, ELAC2, RPS6, DHPS, IL18, KIAA1143, ANK2, KCNMA1, SGK1, SPATA18, RBMS2, COL13A1, PRCC, ATP5MC2, DNAJC24, DTX3, SLC1A5, NOL6, IFI16, SCFD2, MXI1, EMC3, MVB12A, ZNF346, GBP2, SLC35A2, NOP58, TCAF1, STK11IP, MGA, NDUFA1, TYSND1, FMO4, L1CAM, MLH1, VMP1, CDKN2AIPNL, UBLCP1, RAB…	807	637	11043	1.22447	1	1	1
CGAP_EST_QUARTILE	10855:mammary gland_neoplasia_3rd	7	0.349476	0.0968145	FAM25BP, RBM47, FANCD2, HSPA4, FAM25A, NONO, THBS2	1162	45	16356	2.18956	1	1	1
CGAP_EST_QUARTILE	20932:colon_neoplasia_3rd	6	0.299551	0.0811348	PAN2, CDX2, ARMC9, RPS3, FTH1P3, BEST1	1162	33	16356	2.55922	1	1	1
CGAP_EST_QUARTILE	13849:stomach_neoplasia_3rd	10	0.499251	0.0944136	RPL5, DIAPH2, RAB6C, RAB6D, MDH1, MYC, PLA2G2A, SAE1, ACAD10, FERMT3	1162	77	16356	1.82802	1	1	1
CGAP_EST_QUARTILE	20572:placenta_normal_3rd	9	0.449326	0.0943726	GRB7, TNXB, COL1A2, TNXA, CGB8, CGB5, SIRPB2, DCHS1, CGB3	1162	66	16356	1.91942	1	1	1
CGAP_EST_QUARTILE	16212:ovary_neoplasia_3rd	13	0.649026	0.0947283	RAB6C, RAB6D, CRCP, PRORSD1P, HSPA4, HM13, KIAA1671, ATP5MC2, PDE4DIP, MLH1, PRPSAP1, CYB561, MDN1	1162	111	16356	1.64851	1	1	1
CGAP_EST_QUARTILE	19767:prostate_normal_3rd	9	0.449326	0.0943726	CNN1, CDKN1A, ELF3, TAF1C, NONO, SSR2, STARD10, DHRS3, BRD4	1162	66	16356	1.91942	1	1	1
CGAP_EST_QUARTILE	31450:uncharacterized tissue_uncharacterized histology_3rd	11	0.549176	0.0934947	GABRA2, CHRNB1, PON3, ALDH3A1, PTGIR, STEAP1B, TCN2, CCKBR, CYP11A1, PCCB, TNFRSF1A	1162	88	16356	1.75947	1	1	1
CGAP_EST_QUARTILE	16279:cerebrum_normal_3rd	8	0.399401	0.0928474	CDH6, ATP5F1B, TAF1C, MX2, SNURF, LGALS9, RNF185, ZNF233	1162	55	16356	2.04738	1	1	1
CGAP_EST_QUARTILE	1657:brain_neoplasia_3rd	12	0.599101	0.0919447	RPL5, NOP58, NUDC, RPS9, AHCY, LINC00847, FCGRT, IGSF1, RPS6, RPL37A, RPL37, CYB561	1162	99	16356	1.70615	1	1	1
CGAP_EST_QUARTILE	21257:kidney_neoplasia_3rd	7	0.349476	0.0889589	TPX2, IZUMO1, DAB2IP, PMS2P3, LOC100289561, LY6G5B, LRPPRC	1162	44	16356	2.23932	1	1	1
CGAP_EST_QUARTILE	11403:uncharacterized tissue_neoplasia_3rd	7	0.349476	0.0889589	C3, PLEKHG4, TNXB, CHEK2P2, TNXA, ATP5MC2, ZNF300	1162	44	16356	2.23932	1	1	1
CGAP_EST_QUARTILE	19538:mammary gland_normal_3rd	7	0.349476	0.0889589	PSG9, FCGBP, ECM1, ATP5F1B, SERPING1, PLAC1, ZNF136	1162	44	16356	2.23932	1	1	1
UP_TISSUE	Corpus callosum	16	0.798802	0.0885643	RPAIN, NTRK2, STEAP1B, H4C9, UQCC1, TIMM23, PLD4, RNF7, MLH1, CNDP1, HCK, H4C14, HIF1AN, COPS8, SLC18B1, SGK1	1317	144	18482	1.55927	1	1	1
CGAP_EST_QUARTILE	40165:uncharacterized tissue_uncharacterized histology_3rd	14	0.698952	0.0877394	HCP5, C1R, PXN, XIAP, SLC2A3, STAM, THBS2, DEPP1, PLPP7, TIMM10B, CALD1, LTA4H, DLD, DBN1	1162	121	16356	1.6286	1	1	1
CGAP_EST_QUARTILE	16250:ovary_neoplasia_3rd	8	0.399401	0.0794774	EDN3, CD81, RPS6, RPL37A, NR2F1, RPS3, LTA4H, ARAP1	1162	53	16356	2.12464	1	1	1
CGAP_EST_QUARTILE	20363:uncharacterized tissue_normal_3rd	17	0.848727	0.0876481	ANKRD49, DIMT1, TACO1, RPF1, COPS4, LYRM1, QARS1, SCFD2, RBBP5, TMEM139, SERBP1, FDXR, COPS8, LDAH, HOXB7, GUSBP4, RUNX1T1	1162	156	16356	1.53389	1	1	1
CGAP_EST_QUARTILE	10881:mammary gland_neoplasia_3rd	5	0.249626	0.0862721	C3, TNXB, TNXA, ELF3, SNCG	1162	24	16356	2.93244	1	1	1
CGAP_EST_QUARTILE	57:stomach_neoplasia_3rd	16	0.798802	0.0948085	PCSK2, GPR17, POM121L10P, NFIX, HSPA4, NR2F1-AS1, WFDC1, TEX29, REC8, POM121L4P, FANCD2, BCRP3, DGLUCY, ATG4C, SKAP2, LRRC4B	1162	146	16356	1.54255	1	1	1
CGAP_EST_QUARTILE	11569:testi_neoplasia_3rd	8	0.399401	0.0860141	BST2, TPX2, ZNF175, SUPT16H, ATP5F1B, CD81, TAF7, MEF2D	1162	54	16356	2.08529	1	1	1
CGAP_EST_QUARTILE	38123:synovium_uncharacterized histology_3rd	26	1.29805	0.062836	DPAGT1, RBM28, PIGT, TXNL4B, SLC2A5, WDR46, QARS1, IFI16, RBBP5, ANPEP, PDPN, LTA4H, GBP2, PDGFRA, VTA1, CAV1, LRRC49, LOC100289561, MLH1, TOMM40L, TIMM10B, TBX15, SLFN11, PMS2P3, SMPDL3B, CFB	1162	255	16356	1.43517	1	1	1
CGAP_EST_QUARTILE	19822:uncharacterized tissue_neoplasia_3rd	4	0.1997	0.0855471	FAM25BP, DYNC2H1, SFPQ, FAM25A	1162	15	16356	3.75353	1	1	1
UP_TISSUE	Aortic smooth muscle	3	0.149775	0.0837185	VCAN, KCNMA1, AGER	1317	7	18482	6.01432	1	1	1
CGAP_EST_QUARTILE	40213:heart_uncharacterized histology_3rd	14	0.698952	0.0834445	ACADVL, NOP58, PIGT, GOT1, C1R, NONO, HSPB7, AMT, AGT, OLFML3, SERPING1, TAF7, RNF185, BANP	1162	120	16356	1.64217	1	1	1
CGAP_EST_QUARTILE	19698:prostate_normal_3rd	3	0.149775	0.0832573	ZNF331, KIFC3, DGKZ	1162	7	16356	6.03246	1	1	1
CGAP_EST_QUARTILE	6112:mammary gland_neoplasia_3rd	3	0.149775	0.0832573	COG3, RBM34, IRF9	1162	7	16356	6.03246	1	1	1
CGAP_EST_QUARTILE	20324:testi_normal_3rd	3	0.149775	0.0832573	NDST1, TNXB, TNXA	1162	7	16356	6.03246	1	1	1
CGAP_EST_QUARTILE	384:nervou_normal_3rd	12	0.599101	0.0822274	STAT5A, TBX15, C19ORF81, FANCD2, CD81, PNLDC1, LEO1, ERCC6L2-AS1, PLD4, ZNF385D, PFDN6, SLC8A2	1162	97	16356	1.74133	1	1	1
CGAP_EST_QUARTILE	28348:lung_normal_3rd	6	0.299551	0.0811348	CLXN, SPAG17, INO80B, C1ORF116, MID1IP1, CHST5	1162	33	16356	2.55922	1	1	1
CGAP_EST_QUARTILE	872:uncharacterized tissue_uncharacterized histology_3rd	5	0.249626	0.0862721	RBFOX2, CASKIN2, APOC1, RPL37, APOC1P1	1162	24	16356	2.93244	1	1	1
CGAP_EST_QUARTILE	21746:placenta_normal_3rd	4	0.1997	0.0855471	PSG8, PSG4, PBDC1, RPL9	1162	15	16356	3.75353	1	1	1
CGAP_EST_QUARTILE	38097:stomach_neoplasia_3rd	36	1.7973	0.0589455	DPAGT1, RPAIN, TXNL4B, AHCY, MRPL16, TRMT2B, CT55, BEST1, CCNB1, NARS1, MYC, CHEK1, NUP88, COX8A, SLC35A2, ACOT8, ANKRD49, GOT1, RPS7, OXSM, ELAC2, LOC100289561, RPA2, MLH1, FTH1P3, LRPPRC, BST2, GJB1, HAX1, IFI27, TRMT6, PMS2P3, RBM41, NAXD, DLD, SRSF8	1162	375	16356	1.35127	1	1	1
CGAP_EST_QUARTILE	11345:thyroid_neoplasia_3rd	7	0.349476	0.0611973	C3, TNXB, CHEK2P2, TNXA, DHX8, MYC, RPS6	1162	40	16356	2.46325	1	1	1
CGAP_EST_QUARTILE	27817:uncharacterized tissue_uncharacterized histology_3rd	3	0.149775	0.0435816	POM121L10P, POM121L4P, BCRP3	1162	5	16356	8.44544	1	1	1
CGAP_EST_QUARTILE	21435:uncharacterized tissue_neoplasia_3rd	8	0.399401	0.0420696	ANPEP, TLDC2, LAPTM5, LCN2, PRTN3, LTA4H, ARAP1, LTF	1162	46	16356	2.44795	1	1	1
CGAP_EST_QUARTILE	40318:uteru_uncharacterized histology_3rd	24	1.1982	0.04179	AOC3, PLEKHG4, PPP1R15B, ECM1, SGIP1, NONO, COG3, HNF1B, PCOLCE, GPATCH2L, WDR46, TNFRSF1A, PRPSAP1, EID1, BCL9, PRKAR1A, OLFML3, P2RX1, SERPING1, UPRT, VDAC1, HAP1, SGK1, ZNF134	1162	221	16356	1.52859	1	1	1
CGAP_EST_QUARTILE	16811:mammary gland_neoplasia_3rd	5	0.249626	0.0415344	RAB6C, RAB6D, CBX5, SYT1, LOC729080	1162	19	16356	3.70414	1	1	1
CGAP_EST_QUARTILE	11025:colon_neoplasia_3rd	9	0.449326	0.0391577	LTV1, DPAGT1, LINC01123, AHCY, CEACAM7, ZNF439, GDAP1L1, PMS2P3, DNAJC24	1162	55	16356	2.3033	1	1	1
CGAP_EST_QUARTILE	906:cerebellum_normal_3rd	9	0.449326	0.0391577	COX8A, SHF, RNF113A, DIRAS2, DHPS, NDUFA1, ATG2A, SNURF, SIRT2	1162	55	16356	2.3033	1	1	1
CGAP_EST_QUARTILE	21240:kidney_neoplasia_3rd	11	0.549176	0.0386583	LTV1, SFPQ, RPS6, STARD10, PRCC, PDE4DIP, ARAP1, LRPPRC, FTH1P3, RUNX1T1, BEST1	1162	75	16356	2.06444	1	1	1
CGAP_EST_QUARTILE	40199:nervou_normal_3rd	24	1.1982	0.0382943	PLPPR1, TXNL4B, ZNF350, NONO, VTA1, SLA, RSPH9, WDR46, REC8, PLPPR5-AS1, NSG2, PPP1R8, TAF7, MTERF1, VPS45, RPL37, ZNF302, CHST5, CCDC184, GUSBP4, HDX, DBN1, LINC01512, RUNX1T1	1162	219	16356	1.54255	1	1	1
CGAP_EST_QUARTILE	10977:colon_neoplasia_3rd	4	0.1997	0.0382721	DAD1, POLR1F, FTH1P3, BEST1	1162	11	16356	5.11845	1	1	1
CGAP_EST_QUARTILE	29989:liver_normal_3rd	12	0.599101	0.0375855	GJB1, C1R, CD81, VDAC1, A1BG, ERAL1, RAB17, HPD, AGT, DEPP1, CES1, MT1E	1162	85	16356	1.98716	1	1	1
CGAP_EST_QUARTILE	11497:stomach_neoplasia_3rd	11	0.549176	0.0356803	NOP58, HSPH1, IFI16, PBDC1, ATG2A, PMS2P3, LTA4H, S100A14, ZC3HAV1, IL2RG, RBMS2	1162	74	16356	2.09234	1	1	1
HPA_NORMAL_TISSUE_CELLTYPE	appendix; enterocytes - Microvilli	23	1.14828	0.0347412	CLXN, PDGFRA, SLC26A2, ACY3, KRT20, HAPLN4, DDO, VIL1, VCAN, CEACAM1, SCIN, MECOM, PALMD, ANPEP, CDHR2, LEO1, TLDC2, TMEM119, TFF2, VILL, S100A14, PTGDR, CD177	807	200	11043	1.57366	0.999745	1	1
UP_TISSUE	Plasma	31	1.54768	0.030094	PON3, C1QA, FCGBP, ECM1, IL1RN, TNXB, C1R, TNC, A1BG, CFP, CWC27, CNDP1, SERPINA5, C3, C4B, CDH6, ADAMTS13, ANPEP, AOC3, NTRK2, ITGA1, L1CAM, AGT, MFAP4, CEACAM1, LRG1, PROC, LCN2, SERPING1, COL6A3, CFB	1317	294	18482	1.47971	0.999913	1	1
CGAP_EST_QUARTILE	17575:thyroid_neoplasia_3rd	10	0.499251	0.0300528	ECM1, PLVAP, PCDHGB5, PCDHGB4, PCDHGC5, PCDHGC3, DAB2IP, LAPTM5, ARHGEF10L, TUBGCP3	1162	62	16356	2.27028	1	1	1
UP_TISSUE	Lung	216	10.7838	0.0295337	RPL5, IFITM2, GMFG, ICAM4, RPL9, TMEM92, AQP1, MAGEA9, TIAL1, ALKBH3, NDST1, PSMD7, PSMD3, CCN5, FDXR, ARFIP2, RPL37, ISY1-RAB43, SP110, ZNF14, ZFYVE16, NINJ2, SPATA13, VDAC1, TARS2, ALG10B, CES1, SKAP2, MT1E, GRB7, MRPL16, GATA4, MAGEA9B, PRPSAP1, C12ORF57, CD79B, POM121C, SCFD2, NUP88, LTA4H, NTNG1, GLYATL1, PLK1, NR2F1, TYSND1, SLC16A11, CIDEC, TPX2, BPIFB1, SSPN, CCSER2, CDK10, ZNF136, FERMT3…	1317	2681	18482	1.13063	0.999896	1	1
CGAP_EST_QUARTILE	895:uncharacterized tissue_uncharacterized histology_3rd	9	0.449326	0.0291221	MFAP4, IFITM1, PCDHGB5, PCDHGB4, PCDHGC5, RPL37A, PCDHGC3, FTH1P3, BEST1	1162	52	16356	2.43618	1	1	1
CGAP_EST_QUARTILE	40263:head and neck_normal_3rd	15	0.748877	0.0290148	CAV1, WFIKKN2, HSPB7, PDE4DIP, CLEC14A, PYGM, ZNF45, SERPINB5, AQP1, TNFRSF1A, PLPP7, DGLUCY, TAF7, SGK1, CD34	1162	113	16356	1.86846	1	1	1
UP_TISSUE	Colon	108	5.39191	0.0263902	RPL5, ERCC6L, TP53RK, PGAP3, HFE, RORC, NARS1, TRIM29, MTERF1, PRSS8, RPL37, LGALS9, CD177, RPS9, ACOT7, RPL21, MUCL3, RPS6, HNF1B, CEL, LGALS9C, DOK4, TRIM15, SNRPF, CARD14, CFB, HOXB5, INO80B, GIPR, TRMT2B, FUT2, PCDH18, SCFD2, TMEM248, ADGRG5, NLRP3, TRPM7, CYTL1, GTF2IRD2B, GGT6, GTF2IRD2, VTA1, ANKRD40CL, PLK1, LIF, B3GALT5, ERAL1, CYP4F11, ZWINT, CIDEC, SLC6A7, PROC, SRPRB, CDK10, SAE1, ALP…	1317	1251	18482	1.21152	0.999721	1	1
HPA_NORMAL_TISSUE_CELLTYPE	cerebellum; processes in granular layer	24	1.1982	0.0256822	SNAP25, GPR17, BRSK1, LINGO1, CMTM5, PXN, MARS1, CPNE6, IL18, L1CAM, RNF112, GAP43, CACNG8, ZFYVE16, TYROBP, NDUFS5, MAP1A, TMEM119, SNCG, EFHC2, SAE1, CD68, DBN1, BRD4	807	205	11043	1.60203	0.99773	1	1
CGAP_EST_QUARTILE	16006:uteru_uncharacterized histology_3rd	17	0.848727	0.0247487	HLA-H, SP100, ACOT8, TNXB, TNXA, RPL23, MGA, RPS6, KIAA1671, FRG1JP, HCG4B, USE1, IFI27, SERPING1, TBL1X, MARK3, HERC6	1162	132	16356	1.81278	1	1	1
CGAP_EST_QUARTILE	40294:prostate_normal_3rd	29	1.44783	0.0225768	PCSK2, ACADVL, PIGT, AHCY, C1R, PXN, SLC2A3, SLC2A5, DEPP1, IWS1, QARS1, ZMYM3, CALD1, FCGRT, CEP70, IDH3B, LTA4H, GBP2, CD177, RBFOX2, TMOD3, CAV1, NONO, SLC50A1, C1ORF116, ELF5, TAF7, LINC01278, CFB	1162	265	16356	1.54036	1	1	1
UP_TISSUE	Mammary cancer	15	0.748877	0.0209928	SP100, CCNT1, GEMIN2, AVPR2, SLC2A5, DEPDC1B, ELF3, PSMD5, PPP1R8, SNCG, POTEF, TFF1, IKBKG, NUPR1, METTL17	1317	108	18482	1.94908	0.998485	1	1
CGAP_EST_QUARTILE	11015:colon_neoplasia_3rd	14	0.698952	0.0194143	ABCA1, HLA-H, RBM47, NUDC, RPS9, MTFMT, HFE, HCG4B, SERPINB5, POLR3B, UBN2, ZNF737, RPL37A, GBP2	1162	97	16356	2.03155	1	1	1
CGAP_EST_QUARTILE	11067:colon_neoplasia_3rd	4	0.1997	0.0152412	C3, TNXB, TNXA, KRT20	1162	8	16356	7.03787	1	1	1
UP_TISSUE	Esophagus	16	0.798802	0.0111917	IL1RN, H4C9, KRT78, MAGEA9B, SLC1A5, SERPINB5, MAGEA9, CEACAM7, H4C14, SOX15, PAX9, RARA, LCN2, RHCG, LINC00696, CES1	1317	110	18482	2.04122	0.968063	1	1
CGAP_EST_QUARTILE	38079:muscle_normal_3rd	41	2.04693	0.00518873	DPAGT1, MAGEH1, ENY2, TXNL4B, AHCY, DHX8, C1R, CWC25, PBXIP1, CWC27, EFNB1, SH3BGRL, QARS1, SGCA, ZMYM3, CA3, OLFML3, ARFIP2, GET1, SLC35A2, CHRNB1, RAB6C, RAB6D, H4C9, CAV1, NONO, TNNC2, SLC33A1, PDE4DIP, PCOLCE, MLH1, NPM3, MFAP4, NSA2, DOK4, CDKN2AIPNL, H4C14, ZNF439, CLDN12, UPRT, BLZF1	1162	370	16356	1.55974	1	1	1
CGAP_EST_QUARTILE	834:lung_neoplasia_3rd	10	0.499251	0.00383861	CD81, RPL34, SSR2, RPL37A, PMS2P3, LOC100289561, TAF7, IKBKG, NAXD, UGGT2	1162	45	16356	3.12794	1	1	1
CGAP_EST_QUARTILE	23374:colon_normal_3rd	3	0.149775	0.0435816	SLC26A2, IFI27, ELOVL6	1162	5	16356	8.44544	1	1	1
CGAP_EST_QUARTILE	28056:uncharacterized tissue_uncharacterized histology_3rd	3	0.149775	0.0435816	POM121L10P, POM121L4P, BCRP3	1162	5	16356	8.44544	1	1	1
CGAP_EST_QUARTILE	20216:pituitary gland_neoplasia_3rd	24	1.1982	0.0436232	DIRAS3, TBC1D19, ZRANB2, ZNF184, COX17, NDUFC2, COX7A2, MLH1, RGS5, CHCHD5, ERLEC1, FSTL5, EID1, MRPL50, DEPDC1B, RNF169, DAD1, ARFIP1, COX14, UGGT2, TMEM14A, CKLF, ZIM2, CDH18	1162	222	16356	1.5217	1	1	1
CGAP_EST_QUARTILE	11353:thyroid_neoplasia_3rd	7	0.349476	0.0442728	HLA-H, COL1A2, TNC, COL6A3, NDUFC2, ZC3HAV1, HCG4B	1162	37	16356	2.66298	1	1	1
CGAP_EST_QUARTILE	174:mammary gland_neoplasia_3rd	12	0.599101	0.0608321	MAGEH1, C1ORF116, ZNF790, CALD1, FCGRT, FAM120C, PLA2G2A, PMVK, MOSPD3, CYB561, RNF40, NOL6	1162	92	16356	1.83596	1	1	1
CGAP_EST_QUARTILE	23423:colon_neoplasia_3rd	9	0.449326	0.060555	TIMM10B, ACADVL, NPLOC4, HM13, ERBB2, STYK1, LCN2, GET1, RAPGEF6	1162	60	16356	2.11136	1	1	1
CGAP_EST_QUARTILE	13787:colon_normal_3rd	9	0.449326	0.060555	HLA-H, COL1A2, RPL34, KIAA1671, LAPTM5, COL6A3, ARFIP1, RPL37, HCG4B	1162	60	16356	2.11136	1	1	1
CGAP_EST_QUARTILE	23670:head and neck_neoplasia_3rd	14	0.698952	0.0604952	NKAPD1, GRID2, ELAC2, PXN, PYGM, AQP1, FCGRT, PCCB, TRMT6, SERPING1, EPHA1, ZNF311, METTL17, FERMT3	1162	114	16356	1.7286	1	1	1
CGAP_EST_QUARTILE	40271:stomach_uncharacterized histology_3rd	14	0.698952	0.0604952	ACOT7, PIGT, DHPS, FRG1JP, DEPP1, TNFRSF1A, RGS5, OLFML3, PSMD3, SERPING1, RIOK2, PRSS8, CD34, LTF	1162	114	16356	1.7286	1	1	1
UP_TISSUE	Fetal skeletal muscle	4	0.1997	0.0601657	SFPQ, LOC654780, SCN7A, SLC2A3	1317	13	18482	4.31797	1	1	1
CGAP_EST_QUARTILE	21149:head and neck_neoplasia_3rd	10	0.499251	0.058574	BCKDHA, NPLOC4, PIGT, PCDHGB5, PCDHGB4, PCDHGC5, CASKIN2, PCDHGC3, ACKR3, CYP4F11	1162	70	16356	2.01082	1	1	1
CGAP_EST_QUARTILE	8578:uncharacterized tissue_uncharacterized histology_3rd	20	0.998502	0.0585205	LINC01121, MRE11, ZNF350, TAF12, TRPC3, LINC01193, CMTM5, FLT3LG, FAM218A, FRG1HP, NPAS4, TTC8, KIFBP, CCDC30, SHOX, CFAP36, KCNJ5-AS1, SRSF8, METTL18, LAIR1	1162	182	16356	1.54678	1	1	1
CGAP_EST_QUARTILE	11286:head and neck_neoplasia_3rd	6	0.299551	0.0578726	RPS9, BPIFB1, TNXB, TNXA, LY6G5B, RPL37	1162	30	16356	2.81515	1	1	1
UP_TISSUE	Carcinoma	8	0.399401	0.0571273	MRPL50, STK11IP, TFR2, OXSM, CA9, INTS8, OSGEP, BRD4	1317	49	18482	2.29117	1	1	1
CGAP_EST_QUARTILE	19923:brain_neoplasia_3rd	12	0.599101	0.0570426	INO80B, GPR17, NEU4, PCDHGB5, PCDHGB4, PCDHGC5, CD81, CMTM5, GDAP1L1, PCDHGC3, L1CAM, SIRT2	1162	91	16356	1.85614	1	1	1
CGAP_EST_QUARTILE	20467:colon_neoplasia_3rd	7	0.349476	0.0551851	NOP58, PXN, PSMD3, LEO1, SAE1, CFAP43, MDN1	1162	39	16356	2.52641	1	1	1
CGAP_EST_QUARTILE	501:liver_normal_3rd	10	0.499251	0.0543037	C4B, C3, ACOX2, AZGP1P1, APOC1, SERPING1, APOC3, CYP4F11, CFB, APOC1P1	1162	69	16356	2.03996	1	1	1
CGAP_EST_QUARTILE	27978:uncharacterized tissue_uncharacterized histology_3rd	3	0.149775	0.0623414	POM121L10P, POM121L4P, BCRP3	1162	6	16356	7.03787	1	1	1
CGAP_EST_QUARTILE	39127:nervou_normal_3rd	13	0.649026	0.053899	ZNF155, ZNF880, TMEM161B, MRE11, RPEL1, SEMA6D, FAM218A, LZTFL1, TTC8, TRIM6, ATG4C, TRIM6-TRIM34, ASB3	1162	101	16356	1.81173	1	1	1
HPA_NORMAL_TISSUE_CELLTYPE	rectum; enterocytes - Microvilli	22	1.09835	0.0533699	PDGFRA, SLC26A2, ACY3, GDF15, CYP4F11, KRT20, HAPLN4, DDO, VIL1, CEACAM1, SCIN, MECOM, PALMD, CDHR2, LEO1, TMEM119, TFF2, ACKR1, VILL, ALPG, PTGDR, CD177	807	198	11043	1.52045	0.999997	1	1
CGAP_EST_QUARTILE	21685:brain_neoplasia_3rd	16	0.798802	0.0528911	FCGBP, ZNF582, NOP58, PCDHGB5, PCDHGB4, PCDHGC5, NTRK3, PCDHGC3, C4B, IGSF21, BCL6, MAP1A, LY6G5B, ZNF582-DT, SGK1, METTL15	1162	134	16356	1.68068	1	1	1
CGAP_EST_QUARTILE	16247:ovary_neoplasia_3rd	21	1.04843	0.051996	TBC1D8B, CBX5, GFM2, COG4, FTH1P3, CXCL5, BEST1, BST2, NARS1, ELF3, GSTA4, TMEM248, DHRS7B, CCT8, ASIC2, COPS8, SLC18B1, NES, MARK3, TMEM14A, PFDN6	1162	191	16356	1.54759	1	1	1
CGAP_EST_QUARTILE	19252:cerebrum_normal_3rd	6	0.299551	0.0510918	SUPT16H, NAALAD2, RPA2, UBE4A, ELOVL6, RAPGEF6	1162	29	16356	2.91222	1	1	1
UP_TISSUE	Pancreas	83	4.14378	0.0504966	ACADVL, IL1RN, TP53RK, MPG, GORAB, HIF3A, CFAP300, ZDHHC1, ABCC12, GGTLC2, SGCA, MECOM, ANPEP, PSMD3, RTTN, LGALS9, SLC25A45, COX8A, LEFTY1, SAP30BP, PTGIR, RPL21, DCAKD, RPS6, AP3B1, CEL, ARAP1, LGALS9C, H2BC18, PABIR3, ALDH3A1, GPRIN2, DPM3, DEPDC1B, DOK4, CDC42EP5, RPL37A, PCCB, NUPR1, LDAH, PFDN6, SKAP2, GIPR, LAMA4, PBXIP1, MOSPD3, APOL4, CALD1, MVB12A, VILL, S100A14, TENT2, TBL1X, SLC15A3, …	1317	962	18482	1.21078	1	1	1
CGAP_EST_QUARTILE	19296:cerebrum_normal_3rd	5	0.249626	0.0490973	GABBR1, RABL3, RAPGEF5, PABIR3, SLC8A2	1162	20	16356	3.51893	1	1	1
CGAP_EST_QUARTILE	21440:uncharacterized tissue_neoplasia_3rd	27	1.34798	0.0483732	HM13, CWC27, RPL9, WDR46, ATP5F1B, HENMT1, LEO1, ZNF346, METTL17, BANP, BCKDHA, COG3, TACR2, IL18, RPA2, STAM, FLI1, LSM6, NPLOC4, XPOT, P2RX1, CWF19L1, ATG2A, STAM2, MRRF, BLZF1, LTF	1162	260	16356	1.46171	1	1	1
UP_TISSUE	Lymphoblast	35	1.74738	0.0478061	RPL5, RPL30, RPL9, HSPH1, ATP5F1B, QARS1, IFI16, RPS18, CEP70, CNTRL, DHX15, RPS3, RTTN, CCT8, RPS12, SLC35A2, LOC654780, RPS9, H4C9, RPS7, PLK1, MARS1, KRT9, SFPQ, CARHSP1, FANCD2, PRKAR1A, NME7, H4C14, CROCC, SERBP1, RFX5, TUBGCP3, SNRPF, GLA	1317	355	18482	1.38358	1	1	1
CGAP_EST_QUARTILE	40091:genitourinary_normal_3rd	16	0.798802	0.0474286	SLC35A2, SP100, C1R, MID1IP1, MX1, FAM218A, FRG1JP, TSPAN12, QRSL1, WDR46, DEPP1, AQP1, CEP70, CFAP36, SERPING1, CFB	1162	132	16356	1.70615	1	1	1
CGAP_EST_QUARTILE	13800:colon_normal_3rd	8	0.399401	0.0465279	RPL5, IFI27, ANPEP, AKR1B15, RPL23, TRIB3, LY6G5B, RPL9	1162	47	16356	2.39587	1	1	1
CGAP_EST_QUARTILE	7767:thyroid_normal_3rd	8	0.399401	0.0465279	HCP5, FSTL5, NTRK3, RPL34, RFX4, P2RX1, DSE, LOC441179	1162	47	16356	2.39587	1	1	1
CGAP_EST_QUARTILE	21946:uteru_neoplasia_3rd	22	1.09835	0.0462345	MRPS15, ACADVL, NUDC, ZNF681, GOT1, RPS7, DHX8, TRMT2B, ANTXR1, PSMB10, TOMM40L, ZBTB40, GMCL2, TYROBP, AKR1B15, ADGRG5, WDR5, CA9, UBASH3A, LGALS9, SAE1, UGGT2	1162	200	16356	1.54833	1	1	1
CGAP_EST_QUARTILE	40296:uncharacterized tissue_uncharacterized histology_3rd	16	0.798802	0.0448514	RPL5, RAB6C, RAB6D, C1R, LRRC49, PDE4DIP, CLEC14A, PYGM, RPL9, WDR46, MOV10, QARS1, DGLUCY, ZNF613, LTA4H, RNF185	1162	131	16356	1.71917	1	1	1
CGAP_EST_QUARTILE	13723:uncharacterized tissue_neoplasia_3rd	12	0.599101	0.053413	PRPSAP1, RPAIN, PCDHGB5, PCDHGB4, PCDHGC5, SSR2, RPS6, RPL37A, PCDHGC3, SERPING1, RBMS2, H2AC18	1162	90	16356	1.87676	1	1	1
CGAP_EST_QUARTILE	40171:uncharacterized tissue_uncharacterized histology_3rd	13	0.649026	0.099628	SNAP25, PIGT, ATL1, RPA2, ETNPPL, RGS5, EID1, NSG2, TK2, UPRT, LTA4H, LGALS9, CDO1	1162	112	16356	1.63379	1	1	1

## Sheet: Lung
DDX11L1
LOC101928626
ISG15
SCNN1D
ACOT7
CAMTA1-AS2
SLC2A5
C1orf167-AS1
NPPA-AS1
SNORA59A
MIR6730
DHRS3
PDPN
CTRC
SLC25A34-AS1
FBLIM1
HSPB7
CLCNKA
NECAP2
RNU1-1
ESPNP
MST1L
MIR3675
RNU1-2
CROCC
PADI1
MIR3972
PADI6
RCC2-AS1
ARHGEF10L
IGSF21
KLHDC7A
MIR4695
NBL1
PLA2G2E
PLA2G2F
LINC01757
VWA5B1
CDA
CELA3A
ZBTB40
MIR6127
C1QA
MIR4253
LOC101928163
MYOM3
MIR4425
PAFAH2
EXTL1
LIN28A
GPN2
NR0B2
NUDC
PPP1R8
RPA2
SMPDL3B
DNAJC8
TAF12-DT
TAF12
LAPTM5
ZBTB8B
MIR552
GJB4
SFPQ
TFAP2E
AGO4
MRPS15
CSF3R
EPHA10
MANEAL
MACF1
PPIEL
FOXO6-AS1
HIVEP3
GUCA2B
CCDC30
CFAP57
MIR6733
EBNA1BP2
C1orf210
MPL
MIR6735
MIR6079
KLF17
RNU5F-1
MMACHC
P3R3URF
FAAHP1
KNCN
PDZK1IP1
TAL1
AGBL4-AS1
MIR4421
MIR6500
TTC39A-AS1
CDCP2
BSND
FYB2
C1orf87
ATG4C
MIR6068
PDE4B
SGIP1
DYNLT5
SERBP1
ZRANB2-DT
ZRANB2
MSH4
PTGFR
SAMD13
RPF1
GBP2
BTBD8
RPL5
DNTTIP2
PLPPR5-AS1
PALMD
OLFM3
COL11A1
NTNG1
HENMT1
PRPF38B
MYBPHL
CSF1
LRIF1
WNT2B
MOV10
LINC01356
OLFML3
SPAG17
LOC105378933
PHGDH
RNVU1-4
NUDT17
POLR3C
FMO5
BCL9
NBPF11
LINC02805
RNVU1-15
LOC105371215
RNVU1-17
RNVU1-18
LINC02591
H2BP2
H2BC18
H4C14
H3C14
H2AC19
H2BC20P
H3C15
H4C15
H2BC21
H2AC21
MTMR11
VPS45
LINC02988
MRPS21
ECM1
MIR4257
GOLPH3L
SETDB1
ANXA9
LYSMD1
RFX5-AS1
RFX5
SELENBP1
TUFT1
CELF3
RORC
LCE3B
PGLYRP3
PGLYRP4
S100A9
S100A3
S100A14
MIR8083
LOC343052
HAX1
PMVK
PBXIP1
MIR4258
DCST1
SLC50A1
DPM3
POU5F1P4
MSTO1
MSTO2P
RXFP4
SSR2
SEMA4A
SLC25A44
MEF2D
LOC101928177
NES
PRCC
LOC105371458
IFI16
AIM2
LINC01133
DCAF8-DT
DCAF8
NHLH1
CD244
FCER1G
TOMM40L
MIR5187
DUSP12
CCDC190
NUF2
RGS5
TMCO1-AS1
MIR3658
BLZF1
NME7
CCDC181
SELL
GORAB
PRRX1
FMO4
MIR199A2
DNM3OS
DARS2
ASTN1
BRINP2
AXDND1
KIAA1614-AS1
RNASEL
LINC01686
COLGALT2
HMCN1
BRINP3-DT
CACNA1S
ASCL5
IGFN1
MIR5191
IPO9-AS1
ELF3
ELF3-AS1
GPR37L1
ADORA1
CHI3L1
ATP2B4
KISS1
PLEKHA6
PPP1R15B
RBBP5
RAB29
MIR6769B
FCMR
C1orf116
MIR29B2CHG
CD34
LINC02767
LAMB3
LINC00467
LINC01693
RPS6KC1
PROX1-AS1
PROX1
TGFB2-AS1
HHIPL2
CAPN2
LOC101927143
LEFTY1
LEFTY2
LINC02809
MIR3620
MIR6742
TRIM17
LINC01682
AGT
GNPAT
C1orf131
RBM34
HEATR1
EXO1
KIF26B-AS1
NLRP3
TRIM58
MIR5699
CALML5
MIR3155A
LINP1
PROSER2-AS1
CDC123
NUDT5
UCMA
DCLRE1C
C1QL3
SLC39A12
LINC02643
LOC100130992
ARMC3
C10orf67-AS1
GPR158
APBB1IP
LINC03028
EPC1
HSD17B7P2
LINC00839
LINC01518
LINC01264
MIR5100
DEPP1
AGAP10P
FAM25E
GPRIN2
FAM25BP
ANTXRLP1
AGAP9
AGAP13P
AGAP12P
ARHGAP22
TMEM273
DRGX
TIMM23
AGAP6
ZWINT
TMEM26
ADO
PBLD
KIFBP
LOC101928994
TACR2
COL13A1
TYSND1
NODAL
TBATA
CDH23-AS1
C10orf105
MIR7152
SPOCK2
CFAP70
USP54
CHCHD1
SFTPA2
SFTPD
CCSER2
OPN4
SNCG
FAM25A
LIPJ
CH25H
NUDT9P1
FFAR4
TLL2
RRP12
HPS1-AS1
GOT1
CWF19L1
PKD2L1
HIF1AN
TLX1NB
MIR3158-2
NPM3
CYP17A1
SH3PXD2A-AS1
CFAP43
LOC103344931
TDRD1
ABLIM1
PNLIPRP2
ENO4
TIAL1
C10orf88
EEF1AKMT2
AS-PTPRE
LINC01163
CTAGE7P
LRRC27
LINC02870
LINC01167
LINC01168
SCART1
SYCE1
IFITM2
IFITM1
SCT
LINC02688
MUC5AC
TOLLIP
KRTAP5-3
KRTAP5-4
CD81
MRGPRG
OR51D1
TRIM6-TRIM34
CCKBR
TIMM10B
ARFIP2
DNHD1
DCHS1
NLRP10
LINC02709
MICAL2
SPON1
CALCA
CALCB
LINC02751
LINC02729
TPH1
LDHC
IGSF22
DBX1
LGR4-AS1
METTL15
KIF18A
DNAJC24
DCDC1
IMMP1L
PAX6-AS1
CSTF3-DT
CSTF3
NAT10
ELF5
MIR1343
LOC101928510
ALKBH3
ALX4
PRDM11
LINC02696
LINC02687
LINC02716
CRY2
DGKZ
F2
MIR6745
MIR4487
C1QTNF4
SERPING1
MIR130A
CLP1
GLYATL1
LOC283194
FAM111B
DTX4
ZP1
SLC15A3
CD6
CD5
BEST1
SCGB1D1
SCGB2A1
UQCC3
FERMT3
SLC22A11
PYGM
MIR192
MIR6750
ATG2A
GPHA2
MIR6879
SPDYC
SLC25A45
MIR612
TALAM1
CTSW
TSGA10IP
NPAS4
C11orf86
ACY3
MYEOV
SHANK2-AS1
KRTAP5-10
ANAPC15
FOLR1
MIR139
ARAP1-AS2
ARAP1
PLEKHB1
MIR4696
RNF169
KLHL35
GUCY2EP
OMP
NDUFC2
KCTD21-AS1
ALG8
RAB30-DT
ANKRD42
TMEM126A
CCDC89
CCDC81
MIR3166
RAB38
NAALAD2
ANKRD49
MRE11
SRSF8
LNCRNA-IUR
MIR1260B
CFAP300
BIRC3
DYNC2H1
DDI1
GRIA4
CUL5
C11orf87
LINC02550
COLCA2
NKAPD1
PIH1D2
IL18
NCAM1
NCAM1-AS1
TMPRSS5
HTR3A
APOC3
APOA1-AS
APOA1
TMPRSS13
TMPRSS4
SMIM35
MPZL3
UBE4A
ARCN1
TREH
UPK2
DPAGT1
TRIM29
MIR100HG
VWA5A
PANX3
STT3A
STT3A-AS1
CHEK1
LOC118567325
FLI1
LOC101929538
KCNJ5-AS1
TP53AIP1
LINC02551
LINC02731
FAM138D
SLC6A13
NINJ2-AS1
LINC00942
LRTM2
CACNA2D4
CACNA1C-IT3
CACNA1C-AS2
THCAT155
KCNA1
NTF3
ING4
COPS7A
LAG3
C12orf57
RNU7-1
C1S
C1R
C1RL
POU5F1P3
CLEC12A-AS1
EIF2S3B
STYK1
DDX47
H4-16
ARHGDIB
RERG
KCNJ8
ABCC9
SSPN
LINC00941
DENND5B-AS1
ALG10B
ABCD2
PDZRN4
SLC38A4
CCDC184
CCNT1
MIR4701
TROAP-AS1
LINC02395
LINC02396
AQP2
AQP6
COX14
LIMA1
TMPRSS12
TFCP2
LINC00592
LINC02874
KRT7-AS
KRT3
KRT4
KRT78
MIR9898
LOC122455340
PFDN5
SP7
ATP5MC2
MIR196A2
HOXC5
MIR615
LOC100240735
CBX5
GPR84-AS1
ZNF385A
METTL7B
DNAJC14
LOC105369781
PAN2
RBMS2
SNORD59A
ATP5F1B
NACA
PRIM1
NDUFA4L2
INHBE
GLI1
ARHGAP9
MARS1
DTX3
ARHGEF25
LOC101927583
AGAP2
MIR10527
XPOT
LINC02454
LGR5
GLIPR1L2
CAPS2
SYT1
LRRIQ1
TSPAN19
ALX1
RASSF9
C12orf29
CCER1
SOCS2
CRADD
MIR5700
SNRPF
SNRPF-DT
LTA4H
SLC17A8
GAS2L3
LINC00485
PAH
GLT8D2
RFX4
TMEM119
SELPLG
MIR4496
DAO
LINC01405
LINC01404
MIR6760
ACAD10
OAS2
RBM19
TBX5
TBX5-AS1
TMEM233
HNF1A
CAMKK2
MIR7107
HPD
LINC02985
ZCCHC8
PITPNM2
SCARB1
LINC02405
RIMBP2
ADGRD1-AS1
ZNF268
LOC107984132
LOC101928697
TUBA3C
GRK6P1
SPATA13
C1QTNF9
TPTE2P1
NUP58
RPL21
LINC00543
CDX2
LOC102723345
LINC00365
LINC00384
ALOX5AP
LINC00398
TEX26
TEX26-AS1
HSPH1
RFC3
LINC00445
DCLK1
UFM1
FREM2
LINC00437
LOC101929140
KBTBD6
COG3
ERICH6B
LINC01198
NUDT15
MED4
CDADC1
LOC105370203
ARL11
LINC02333
TPTE2P3
PCDH8
MIR1297
PRR20A
PRR20B
PRR20C
PRR20D
PRR20E
LINC01075
LINC00395
LINC00383
LINC00351
MIR622
GPC6
MBNL2
MIR623
LINC01039
CLYBL-AS3
LINC00554
ARGLU1
MIR8073
NAXD
TEX29
TUBGCP3
ATP11A-AS1
F10-AS1
PROZ
ADPRHL1
GAS6-AS1
C13orf46
POTEM
METTL17
SLC39A2
LOC101929718
RNASE7
SUPT16H
DAD1
AJUBA
PSMB11
CMTM5
MIR208A
MHRT
MIR208B
MYH7
ZFHX2
CPNE6
NRL
IRF9
REC8
MDP1
GMPR2
NEDD8-MDP1
TGM1
RIPK3
LINC02282
LINC02313
RNU6-8
RALGAPA1
PAX9
LOC112268136
CLEC14A
GEMIN2
LINC02315
LINC02302
LRR1
NEMF
RN7SL3
MIR6076
LINC01588
ATL1
RTRAF
OTX2-AS1
SIX6
MNAT1
RHOJ
ZBTB25
GPX2
LINC02324
ZFYVE26
LOC100996664
RBM25
VSX2
FCF1
AREL1
YLPM1
BATF
GPATCH2L
MIR1260A
ADCK1
NRXN3
TTC8
LINC00642
LOC105370619
DGLUCY
GPR68
TRIP11
ASB2
CCDC197
IFI27
SERPINA2
SERPINA1
SERPINA5
TCL1B
LINC01550
MIR342
MIR493
RTL1
MIR377
LINC02285
LINC00524
LOC105378183
MARK3
LINC00638
PLD4
FAM30A
CHEK2P2
MIR5701-1
LINC01193
IGHV1OR15-3
MIR1268A
GOLGA6L2
SNURF
SNORD115-5
SNORD115-15
SNORD115-16
SNORD115-17
SNORD115-18
SNORD115-22
PWAR4
SNORD115-23
SNORD115-24
SNORD115-26
SNORD115-28
SNORD115-29
SNORD115-31
SNORD115-32
SNORD115-33
SNORD115-39
SNORD115-40
SNORD115-41
MIR4715
GABRA5
HERC2P10
NUTM1
NOP10
MIR1233-1
MIR1233-2
DPH6-DT
LOC145845
PHGR1
KNSTRN
NDUFAF1
LTK
MGA
GANC
SNAP23
UBR1
MAP1A
SPG11
LOC100419583
SHF
SLC28A2-AS1
SEMA6D
EID1
SHC4
GALK2
MIR4716
MIR4713HG
TMOD3
LEO1
RNF111
FOXB1
MIR6085
PIF1
MTFMT
MIR4311
LINC02206
MAP2K5
LRRC49
THAP10
GOLGA6B
REC114
GOLGA6A
ISLR
STRA6
CCDC33
CYP11A1
LINC02255
MIR4513
MIR631
MIR4313
LINGO1-AS2
LINGO1
GOLGA6FP
SH2D7
DNAJA4
LOC100129540
ANKRD34C-AS1
MIR5572
GOLGA6L10
LOC727751
GOLGA6L5P
SLC28A1
GOLGA6L3
LINC02883
MIR1276
AGBL1
NTRK3-AS1
NTRK3
RLBP1
MIR6766
MIR9-3HG
RHCG
ANPEP
ZNF710-AS1
UNC45A
IRAIN
SPATA41
PRKXP1
GCAWKR
PCSK6-AS1
MPG
MIR4717
SRRM2-AS1
PRSS33
PRSS30P
LINC00921
GLIS2
MIR6769A
TMEM114
CARHSP1
TVP23A
CIITA
PRM2
NPIPA3
BMERB1
SYT17
LYRM1
CRYM-AS1
TNRC6A
LINC01567
IL27
NUPR1
SULT1A2
SULT1A1
ATP2A1
SNX29P2
LOC606724
SULT1A4
LOC388242
MIR3680-2
MVP
TLCD3B
SULT1A3
LOC613038
SEPTIN1
RNF40
STX1B
VKORC1
PRSS8
PYDC1
ITGAM
ITGAX
ITGAD
TP53TG3D
TP53TG3
TP53TG3C
TP53TG3B
CCNYL3
LOC112268173
TP53TG3HP
LINC02167
LINC02192
ABCC12
CES1P1
CES1
GNAO1-AS1
MT4
MT1E
MT1B
SLC12A3
CETP
CCL22
DOK4
ADGRG5
DRC7
MIR6772
KIFC3
TEPP
APOOP5
LINC00920
CKLF
CKLF-CMTM1
CDH16
PLEKHG4
ZDHHC1
PSMB10
MIR6773
MIR140
DDX19A-DT
SF3B3
COG4
VAC14-AS1
HYDIN
CHST4
TAT-AS1
DHX38
TXNL4B
ZFHX3-AS1
LINC01572
PSMD7
MLKL
WWOX
LINC01229
MAFTRR
DYNLRB2
LINC01227
C16orf46
PKD1L2
MIR6504
LOC654780
KCNG4
WFDC1
KIAA0513
LINC02139
MIR5093
LOC101928557
MIR6774
LINC00917
FOXL1
LINC02181
JPH3
KLHDC4
BANP
LINC02182
LOC100287036
SNORA119
LOC105371430
TIMM22
SCARF1
SERPINF1
LOC101927911
OR3A2
TRPV1
P2RX1
LINC01975
GGT6
TM4SF5
VMO1
GLTPD2
SCIMP
AIPL1
SLC16A11
ASGR2
ASGR1
MIR324
ACAP1
CHRNB1
CD68
SOX15
TP53
ALOX15B
RNF222
RCVRN
MYH3
DNAH9
ELAC2
CDRT15P2
LINC02087
SNORD49B
SNORD49A
SNORD65
KRT17P1
TNFRSF13B
LINC02090
RAI1-AS1
SMCR5
MYO15A
LINC02076
LGALS9C
TBC1D28
PRPSAP2
GRAPL
SNORD3A
MFAP4
RNF112
SNORA59B
ALDH3A1
CCDC144CP
LGALS9B
CDRT15L2
LOC100287072
LINC02088
CCDC144NL-AS1
CCDC144NL
LOC339260
DHRS7B
LGALS9
PYY2
PPY2P
SEBOX
SLC13A2
FOXN1
ERAL1
NSRP1
MIR423
SMURF2P1-LRRC37BP1
MIR4725
MIR365B
LOC105371730
ASIC2
UNC45B
LOC105371933
SLFN11
GAS2L2
RDM1
TBC1D3B
TBC1D3I
TBC1D3H
TBC1D3F
HNF1B
TBC1D3L
TBC1D3G
MIR4727
CWC25
SNORA21
RPL23
MIR6779
LOC101929578
ERBB2
MIR4728
GRB7
PSMD3
CSF3
MED24
RAPGEFL1
MIR6867
RARA
RARA-AS1
GJD3
CCR7
KRTAP2-1
KRTAP4-9
KRTAP9-2
KRTAP9-7
KRT33A
KRT33B
KRT34
KRT31
KRT13
KRT15
KRT9
KRT14
HAP1
STAT5A
BECN1
MIR6781
AOC2
AOC3
IFI35
TMEM106A
CCDC200
LINC00910
DHX8
LOC105371789
SLC4A1
MIR6783
NMT1
DCAKD
ARHGAP27
MAPK8IP1P2
STH
PRR15L
HOXB1
HOXB-AS1
HOXB-AS2
HOXB4
MIR10A
HOXB-AS3
HOXB3
HOXB5
HOXB7
MIR196A1
PRAC2
PRAC1
MIR3185
HOXB13
B4GALNT2
MIR6165
SGCA
TMEM92
ACSF2
CACNA1G-AS1
MIR8059
ANKRD40CL
HLF
MSX2P1
TSPOAP1
MIR4736
RNF43
VMP1
PTRH2
HEATR6-DT
HEATR6
INTS2
TBC1D3P2
CYB561
CSH2
GH1
CD79B
SCN4A
PRR29-AS1
TEX2
PRKAR1A
LINC01152
LINC02092
DNAI2
CD300A
CD300LD-AS1
OTOP3
MRPL58
CASKIN2
SMIM6
LOC122455342
MXRA7
LINC00868
MGAT5B
LOC105371899
SNHG20
SEC14L1
SCARNA16
MIR6516
LINC01973
LOC105371910
DNAH17
CEP295NL
C1QTNF1-AS1
LINC01977
LINC01979
MIR1268B
CARD14
NPLOC4
TSPAN10
TEX19
HEXD-IT1
ZNF750
MIR8078
CETN1
ADCYAP1
NDC80
SLC35G4
MIR7153
LINC01443
SNRPD1
CTAGE1
SLC25A52
MIR187
SYT4
SIGLEC15
LOXHD1
MIR1539
C18orf32
BOD1L2
NARS1
ALPK2
GRP
SERPINB5
LOC105372179
RTTN
C18orf63
CNDP1
PARD6G-AS1
PRTN3
GNA15
GNA15-DT
TEKTIP1
MATK
NMRK2
SNORD37
CREB3L3
STAP2
LRG1
MIR7-3HG
MIR7-3
CD70
C3
VAV1
RETN
PRAM1
MYO1F
ACTL9
ZNF317
ZNF266
ZNF560
ZGLP1
MIR1238
MIR6793
MIR6886
LOC105372273
ANGPTL8
MIR7974
CNN1
ZNF439
ZNF69
ZNF763
ZNF136
DHPS
GNG14
SNORD135
RTBDN
DNASE2
NFIX
RLN3
CLEC17A
ADGRE2
BRD4
PGLYRP2
CYP4F24P
OR10H1
CLEC4OP
CYP4F11
LINC00905
HSH2D
FAM32A
USE1
PLVAP
CCDC194
BISPR
MVB12A
BST2
NIBAN3
SNORA68
PDE4C
GDF15
MIR3189
LRRC25
NR2C2AP
HAPLN4
ZNF14
ZNF56P
LINC00663
ZNF253
ZNF486
ZNF737
ZNF708
ZNF738
ZNF43
ZNF729
GOLGA2P9
LOC100996349
ZNF99
ZNF728
ZNF730
ZNF724
LINC01224
RPSAP58
ZNF681
NUDT19
CHST8
ZNF302
ZNF807P
LINC01801
MIR6887
MIR5196
FFAR3
GPR42
SBSN
GAPDHS
UPK1A
PSENEN
U2AF1L4
NPHS1
TYROBP
ZNF529-AS1
LOC728485
ZNF790
ZNF345
ZNF875
ZNF540
ZNF573
RASGRP4
CAPN12
LGALS7
LGALS7B
SARS2
SYCN
IFNL3
MIR6719
FCGBP
AKT2
MIR641
HIPK4
MIA-RAB4B
CYP2B7P
CYP2F1
BCKDHA
EXOSC5
ERICH4
PCAT19
CEACAM4
CEACAM6
MIR6797
CD79A
CNFN
LOC101930071
LIPE-AS1
CEACAM1
PSG8
PSG10P
PSG1
PSG7
PSG11
PSG9
CD177
ZNF283
ZNF45
ZNF221
ZNF230
ZNF230-DT
ZNF223
ZNF225-AS1
ZNF234
ZNF233
IGSF23
MIR4531
APOC1
APOC1P1
GEMIN7
MARK4
RTN2
GIPR
MEIOSIN
HIF3A
PTGIR
GNG8
MIR320E
SLC1A5
SAE1
C5AR2
SLC8A2
NOP53
CRX
TPRX2
SNAR-A12
SNAR-C5
SNAR-A1
SNAR-A3
SNAR-C2
SNAR-C4
SNAR-A13
SNAR-C3
SNAR-C1
FUT2
IZUMO1
PLEKHA4
CGB3
CGB5
CGB8
SLC6A16
FLT3LG
SNORD33
SNORD34
SNORD35A
FCGRT
MIR6799
MED25
IL4I1
SNAR-A4
SNAR-A14
SNAR-A5
SNAR-A6
SNAR-A7
SNAR-A9
SNAR-A10
SNAR-A11
SNAR-B1
IZUMO2
NAPSA
LRRC4B
SNAR-F
SNORD88B
SNORD88A
KLK1
LOC105372441
KLK3
KLK5
KLK7
KLK14
SIGLEC9
SIGLEC7
CD33
IGLON5
VSIG10L
C19orf84
SIGLEC8
SIGLEC5
HAS1
ZNF649
ZNF613
ZNF350
ZNF836
ZNF480
ZNF880
ZNF578
ZNF665
ZNF677
ZNF331
CACNG8
LILRB3
LAIR1
CDC42EP5
LILRA2
KIR3DL3
KIR3DL1
KIR2DS4
KIR3DL2
NCR1
BRSK1
SHISA7
LINC01864
ZIM2
AURKC
ZNF543
ZNF17
ZNF550
ZNF530
ZNF134
ZSCAN4
ZNF671
ZNF587B
ZNF587
ZSCAN22
LOC105372480
MIR6806
A1BG
MIR10394
ZNF132
SLC27A5
MIR6807
LINC01865
LOC102723730
TRAPPC12-AS1
RPS7
ALLC
LOC105373394
LOC400940
MIR4261
RN7SL832P
LPIN1
MYCNUT
MYCN
VSNL1
OSR1
HS1BP3-IT1
LDAH
APOB
TDRD15
MIR1301
TCF23
DNAJC5G
FTH1P3
TOGARAM2
EHD3
DPY30
LTBP1
MORN2
OXER1
ABCG8
LRPPRC
PREPL
CAMKMT
LINC01121
LINC02583
LINC01119
EPCAM-DT
MSH2-OT1
CHAC2
ERLEC1
ASB3
MTIF2
PRORSD1P
MDH1
WDPCP
LINC02579
LINC01829
ETAA1
CNRIP1
ANTXR1
TIA1
SNRPG
ATP6V1B1
DUSP11
C2orf81
INO80B-WBP1
INO80B
LINC01291
SNAR-H
LRRTM1
LINC01815
VAMP8
MIR6071
LOC284950
IMMT
MIR4436A
GGT8P
KCNIP3
NEURL3
LOC105373496
MIR3127
LINC02611
MITD1
NPAS2-AS1
MRPS9-AS1
C2orf49
SULT1C2
MIR4265
LINC01123
MIR4267
MIR4436B1
MTLN
ACOXL-AS1
ZC3H6
CHCHD5
IL1RN
PSD4
PAX8
CBWD2
RABL2A
RPL23AP7
LINC02992
EN1
C1QL2
STEAP3-AS1
SCTR-AS1
CNTNAP5
CNTNAP5-DT
CYP27C1
PROC
GPR17
LIMS2
SFT2D3
LOC101927881
LINC02572
LINC01856
RAB6C
FAR2P1
MED15P9
POTEF
CYP4F62P
POTEJ
CYP4F30P
AMER3
POTEKP
ZNF285CP
FAM201B
RAB3GAP1
MMADHC-DT
LINC01876
LINC01806
LOC101929633
SCN7A
METAP1D
LINC01305
HOXD12
HOXD9
HOXD3
CHROMR
SCHLAP1
NEUROD1
ZNF804A
AOX1
CFLAR
CASP8
ZDBF2
FAM237A
PLEKHM3
RPL37A
MIR6809
TNS1
TNS1-AS1
MIR6513
TMBIM1
MIR6810
CATIP
CATIP-AS2
SLC11A1
VIL1
PLCD4
TUBA4B
SPEGNB
MIR3132
STK11IP
CCDC140
SP110
SP100
ARMC9
TEX44
ALPG
PRSS56
EFHD1
NGEF
NEU2
IQCA1
ACKR3
COPS8
COL6A3
RAB17
MIR4440
MIR4441
MGC16025
MIR4269
MIR4786
OR6B3
GPR35
AGXT
NEU4
FAM240C
TRIB3
SLC52A3
SIRPB2
LOC388780
ZNF343
TMC2
IDH3B
C20orf141
TMEM239
UBOX5
GFRA4
SPEF1
LINC01730
LINC01433
PRND
LOC643406
LINC00654
SHLD1
MCM8
TRMT6
LRRN4
SNAP25
PCSK2
RBBP9
LINC00237
LOC112268271
NKX2-2
LINC00261
CST9
CST2
CST5
VSX1
FRG1BP
HM13
TPX2
MYLK2
FOXS1
HCK
C20orf203
BPIFB3
BPIFB1
AHCY
MIR499A
MIR499B
UQCC1
GDF5
FER1L4
RBM39
TLDC2
SRC
BPI
LBP
SNORA71D
SGK2
JPH2
GDAP1L1
R3HDML
HNF4A-AS1
MIR3646
CCN5
PIGT
ACOT8
LOC100131496
LOC101927377
ZMYND8
LINC00494
CSE1L
CSE1L-DT
RIPOR3-AS1
DPM1
LINC01429
LOC105372672
GCNT7
BMP7-AS1
MIR296
MIR298
EDN3
PHACTR3-AS1
LOC729296
LOC100128310
LINC00659
SEPTIN14P20
MIR10396A
ANKRD30BP2
CYP4F29P
LOC110091776
ABCC13
MIR125B2
LINC01683
MIR155HG
JAM2
CCT8
LINC00945
LINC01548
IFNGR2
LOC101928126
SETD4
GET1
SH3BGR
B3GALT5
B3GALT5-AS1
MX2
MX1
LINC00111
LINC00112
LINC00479
SNORA91
TFF3
TFF2
TFF1
TMPRSS3
UBASH3A
CBS
LINC00322
LINC02575
TSPEAR-AS2
KRTAP10-7
KRTAP10-11
C21orf58
S100B
POTEH
LINC01665
GAB4
CECR7
CECR3
MIR648
USP18
GGT3P
LINC00895
CCDC188
MIR1286
RIMBP3
LOC102724728
POM121L8P
RIMBP3C
VPREB1
GGTLC2
POM121L1P
MIR650
DRICH1
C22orf15
LOC100652871
GSTT4
BCRP3
POM121L10P
KIAA1671
CRYBB1
MIAT
MIATNB
ZNRF3-AS1
SNORD125
HORMAD2
HORMAD2-AS1
LIF-AS1
LIF
KIAA1656
LOC105372990
SEC14L3
GAL3ST1
TCN2
PLA2G3
RNF185
MIR3928
MIR7109
YWHAH-AS1
AP1B1P1
MIR3909
MIR6069
APOL6
RBFOX2
APOL3
APOL2
APOL1
CACNG2-DT
CSF2RB
IL2RB
C1QTNF6
CYTH4
NOL12
GALR3
MIR4534
SNORA92
KCNJ4
APOBEC3A
APOBEC3B
APOBEC3B-AS1
APOBEC3C
SNORD83A
SNORD139
MGAT3-AS1
ENTHD1
LOC112268293
L3MBTL2-AS1
ZC3H7B
CSDC2
LOC105373044
CYP2D6
CYP2D7
SCUBE1-AS1
LINC01639
EFCAB6-AS1
SHISAL1
MIR1249
LOC339685
EPIC1
LINC00898
LOC284933
MOV10L1
ACR
LOC105373100
CIDEC
EMC3-AS1
EMC3
ATP2B2-IT2
LINC00606
HRH1
VGLL4
TSEN2
TMEM40
SNORA93
LINC00620
TPRXL
GRIP2
CCDC174
LINC02011
MRPS25
EAF1
METTL6
ZNF385D
UBE2E1-AS1
THRB-AS1
OXSM
LRRC3B
GADL1
ARPP21
MLH1
VILL
SLC22A14
ENTPD3-AS1
ZNF619
CCK
CCDC13-AS1
GASK1A
C3orf86
ZNF501
MIR564
TMEM42
CLEC3B
LZTFL1
CCRL2
CCR5AS
LTF
RTP3
MYL3
PTH1R
MIR711
MIR6890
QARS1
AMT
TRAIP
RBM6
GNAT1
LSMEM2
HYAL1
TUSC2
GPR62
LINC00696
TLR9
MIR135A1
ITIH3
ITIH4-AS1
WNT5A
SPATA12
RPP14
ACOX2
C3orf14
PTPRG-AS1
PRICKLE2-AS3
ADAMTS9
[truncated: 947 more rows]

[truncated: 20 more sheets: Lung_DAVID, Kidney, Kidney_DAVID, Breast, Breast_DAVID, Cardiovascular, Cardiovascular_DAVID, Digestive tract, Digestive_tract_DAVID, Epidermis, Epidermis_DAVID, Muscle, Muscle_DAVID, Pancreas, Pancreas_DAVID, Prostate, Prostate_DAVID, Uterus, Uterus_DAVID, CORE]
